# Supplementary material for: MLL-AF4 and a murinized pSer-variant thereof are turning on the nucleolar stress pathway
Source: Springer Nature journal article supplement (doi:10.1186/s13578-022-00781-y), 2022-04-25

## Supplemental Data file

### Supplemental data files (Excel):

The first set of 5 files (MACE-data) contains the gene entries with gene identifier, gene symbol, gene name, mean exp, mean mock, fold change log<sub>2</sub>, pvalue, -log<sub>10</sub>(pvalue), var-log<sub>2</sub>, chromosome number (with beginning and end), classification (into pseudogene (PG), non-annotated gene (NA), LINC RNA gene (LINC), MIR gene (MIR), SNO gene (SNO), MT gene (MT) and protein coding gene (PCG)).

Data sets 6 and 7 contain the data used for heatmap analysis.

Data sets 8-12 contain the data used for volcano plot analysis

1. MA4 gene signature.xlsx
2. MA4m gene signature.xlsx
3. A4M gene signature.xlsx
4. MA4\_A4M gene signature.xlsx
5. MA4m\_A4M gene signature.xlsx
6. Heatmap dataset 1.xlsx
7. Heatmap dataset 2.xlsx
8. MA4 volcano.xlsx
9. MA4m volcano.xlsx
10. A4M volcano.xlsx
11. MA4\_A4M volcano.xlsx
12. MA4m\_A4M volcano.xlsx

### Supplemental Figure legends:

#### Figure S1: Bioinformatic analysis of MACE-Seq data-I

**Heatmaps analysis.** MACE experiments were performed and resulting data were analyzed by Bioconductor software to create output Excel files. Various bioinformatic tools were used to analyze these data: heatmaps with <http://www.heatmapper.ca/expression/>. Only protein coding genes have been analyzed.

#### Figure S2: Bioinformatic analysis of MACE-Seq data-II

**Volcano plot analysis.** MACE experiments were performed and resulting data were analyzed by Bioconductor software to create output Excel files. Various bioinformatic tools were used to analyze these data: volcano plots with [huygens.science.uva.nl](http://huygens.science.uva.nl). Only protein coding genes have been analyzed.

#### Figure S3: Investigation of protein coding genes which are common and unique for MA4 and MA4m cells

From the MACE-Seq data, all protein coding genes were extracted that are expressed only in MA4 or MA4m cells. These gene sets ( $\log_2 \pm 1$ ) were separated for up- and down-regulated genes and then analyzed for overlapping and idiosyncratic genes. As displayed, MA4 and MA4m share 7 commonly up-regulated genes, while 44 and 61 uniquely up-regulated genes, respectively. Similarly, MA4 and MA4m share 26 commonly down-regulated genes, while 79 and 76 uniquely down-regulated genes, respectively.

**Figure S4: Investigation of protein coding genes which are common and unique for CO and COm cells**

From the MACE-Seq data, all protein coding genes were extracted that are expressed only in CO or COm cells. These gene sets ( $\log_2 \pm 2$ ) were separated for up- and down-regulated genes and then analyzed for overlapping and idiosyncratic genes. As displayed, CO and COm share 18 commonly up-regulated genes, while 84 and 18 uniquely up-regulated genes, respectively. Similarly, CO and COm share 7 commonly down-regulated genes, while 112 and 14 uniquely down-regulated genes, respectively.

Figure S1

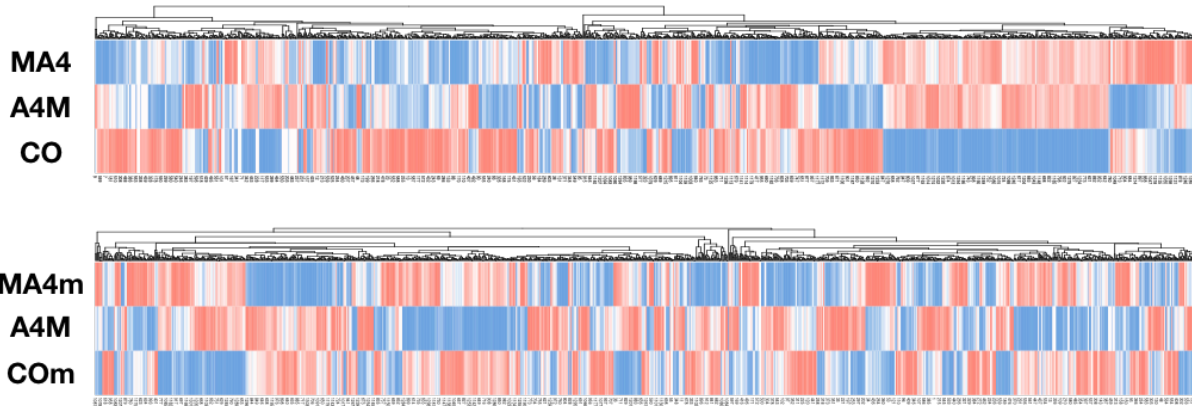

Figure S2

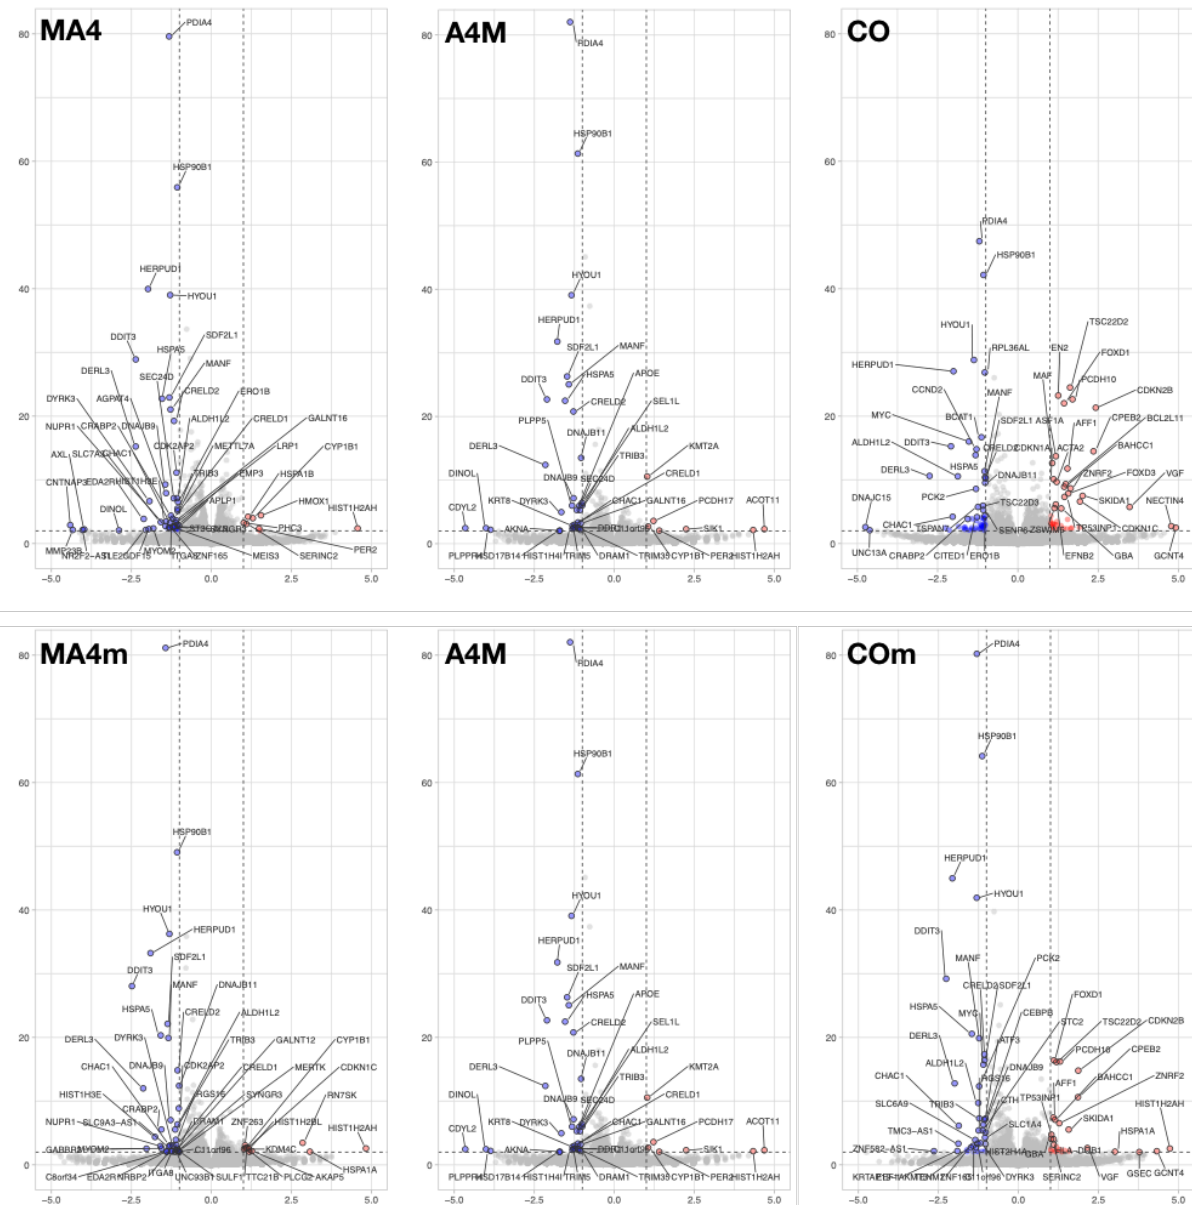

**Figure S3**

**common and unique PCG genes in MLL-AF4 and MLL-AF4m (>2 -fold)  
completely absent in A4M/Co/Com**

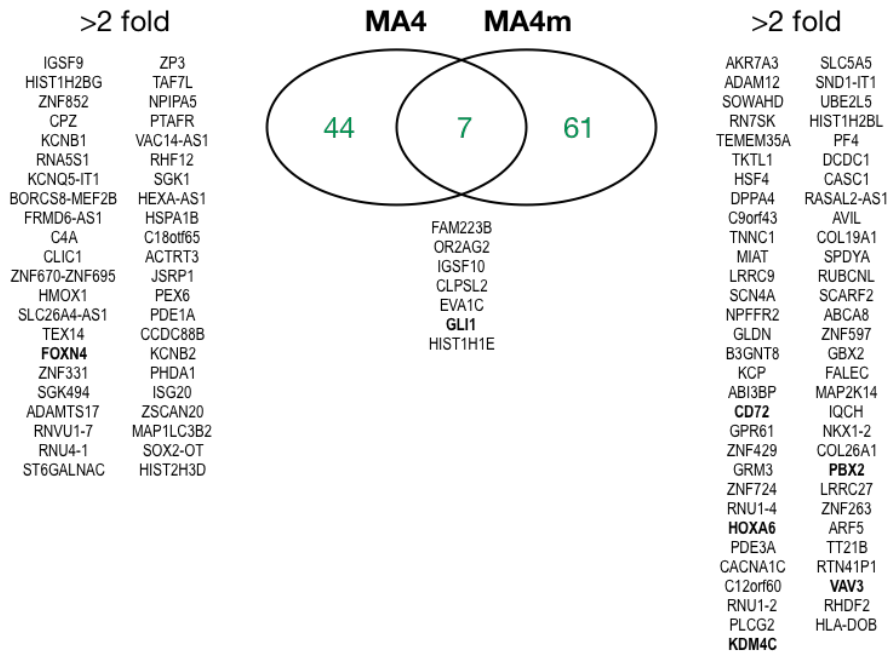

**common and unique PCG genes in MLL-AF4 and MLL-AF4m (<2 -fold)  
completely absent in A4M/Co/Com**

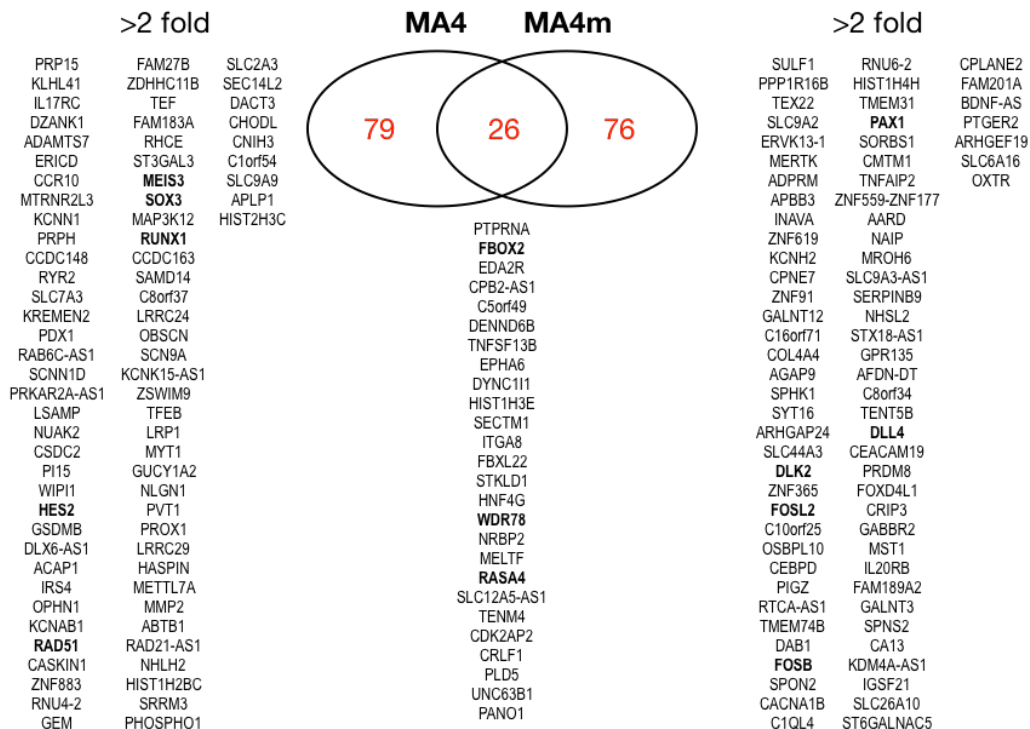

**Figure S4**

**common and unique PCG genes in CO and COm (>4 -fold)  
absent in MA4, MA4m, A4M**

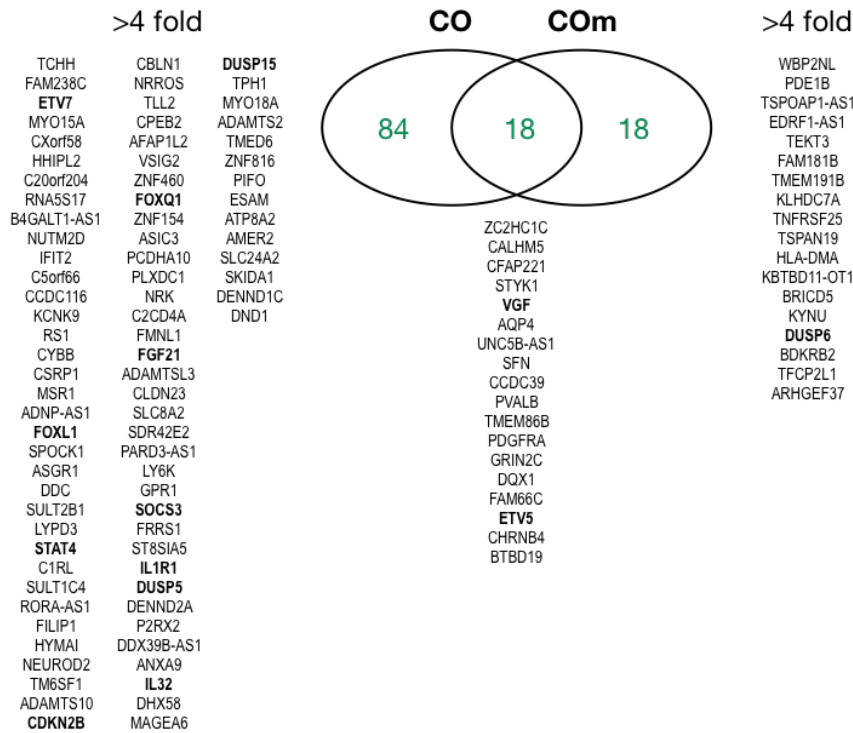

**common and unique PCG genes in CO and COm (>4 -fold)  
absent in MA4, MA4m, A4M**

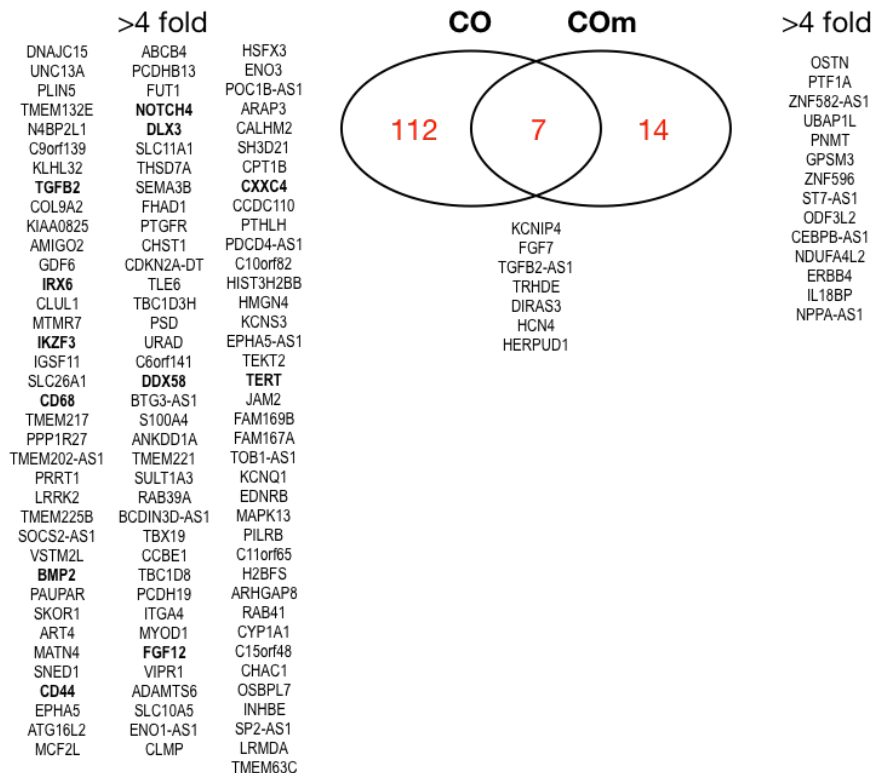

Supplement: MOESM13 [file 13578_2022_781_MOESM13_ESM.pdf]
