# Supplementary material for: MLL-AF4 and a murinized pSer-variant thereof are turning on the nucleolar stress pathway
Source: Cell Biosci. 2022 Apr 25;12:47. doi: 10.1186/s13578-022-00781-y (PMC9036721; doi:10.1186/s13578-022-00781-y)
Supplement: Supplementary file 1 — Additional file 1: MA4 gene signature. [file 13578_2022_781_MOESM1_ESM.xlsx]

## Sheet: Sheet1
ID	gene symbol	gene name	mean exp	mean Mock	log2	pvalue	minus log 10	log2 rolf	chrom	Anfang	Ende	PG	NA	LINC	MIR	SNO	MT	ProCodG
ENSG00000274997	HIST1H2AH	histone cluster 1 H2A family member h	4.86751	0	4.56754	0.00414441	2.38254	?	6	27147513	27147515							1
ENSG00000228150	AL357140.2	NA	4.46463	0	4.40932	0.00722982	2.14087	?	1	9949638	9949974		1					0
ENSG00000256849	TCP1P3	t-complex 1 pseudogene 3	3.7702	0	4.08058	0.0167376	1.77631	?	12	19941521	19943018	1						0
ENSG00000260014	LSM3P5	LSM3 homolog, U6 small nuclear RNA and mRNA degradation associated pseudogene 5	3.29122	0	3.96448	0.0181122	1.74203	?	16	78355529	78355834	1						0
ENSG00000273063	AC007250.1	NA	3.20192	0	3.95133	0.0191864	1.71701	?	2	58241349	58241686		1					0
ENSG00000254676	AP000873.4	NA	3.25128	0	3.89618	0.02631	1.57988	?	11	83184082	83184520		1					0
ENSG00000176928	GCNT4	glucosaminyl (N-acetyl) transferase 4, core 2	3.15096	0	3.86666	0.0181494	1.74114	?	5	75025346	75028675							1
ENSG00000232485	AC098820.1	NA	3.16668	0	3.84931	0.0563196	1.24934	?	2	216487804	216488243		1					0
ENSG00000278576	AL162171.3	NA	2.89466	0	3.79201	0.0452552	1.34433	?	14	88589231	88592408		1					0
ENSG00000269692	FKBP4P2	FK506 binding protein 4 pseudogene 2	2.89936	0	3.74067	0.040286	1.39485	?	9	39631046	39632416	1						0
ENSG00000083635 #or# ENSG00000223732	AL359706.1	NUFIP1, FMR1 interacting protein 1 #or# NA	2.63204	0	3.65001	0.047043	1.3275	?	13	44982077	44982154		1					0
ENSG00000237154	MCFD2P1	multiple coagulation factor deficiency 2 pseudogene 1	2.69241	0	3.61718	0.0676738	1.16958	?	6	27407697	27407996	1						0
ENSG00000229299	AL121845.1	NA	2.59209	0	3.57608	0.0595493	1.22512	?	20	63745823	63745958		1					0
ENSG00000105877	DNAH11	dynein axonemal heavy chain 11	2.54744	0	3.55846	0.0407442	1.38993	?	7	21901007	21901116							1
ENSG00000271816	AC022400.5	NA	2.53642	0	3.55721	0.089921	1.04614	?	10	73699151	73699588		1					0
ENSG00000226375	AL022310.1	NA	2.42038	0	3.53995	0.117913	0.92844	?	1	173174300	173174574		1					0
ENSG00000116544	DLGAP3	DLG associated protein 3	2.5968	0	3.5374	0.0907999	1.04191	?	1	34905165	34905434							1
ENSG00000130024 #or# ENSG00000232640 /// ENSG00000232640	AL354892.2	NA /// PHD finger protein 10 #or# NA	2.43611	0	3.51653	0.0789533	1.10263	?	6	169725091	169725316		1					0
ENSG00000176463	SLCO3A1	solute carrier organic anion transporter family member 3A1	2.33579	0	3.49002	0.0521418	1.28281	?	15	92170872	92172435							1
ENSG00000265055	AC145343.1	NA	2.38044	0	3.48964	0.0933916	1.02969	?	17	68096102	68096478		1					0
ENSG00000173110	HSPA6	heat shock protein family A (Hsp70) member 6	2.28012	0	3.44863	0.0946565	1.02385	?	1	161526591	161526910							1
ENSG00000154957	ZNF18	zinc finger protein 18	2.1798	0	3.42997	0.0648294	1.18823	?	17	11992830	11992911							1
ENSG00000222724	RNU2-63P	RNA, U2 small nuclear 63, pseudogene	2.39616	0	3.42662	0.0602965	1.21971	?	2	88016354	88016547	1						0
ENSG00000085552	IGSF9	immunoglobulin superfamily member 9	2.29584	0	3.40584	0.10206	0.991142	?	1	159927042	159927344							1
ENSG00000277901	AL390037.1	NA	2.28482	0	3.39728	0.120487	0.919061	?	20	23320958	23321209		1					0
ENSG00000270557	AC013731.1	NA	2.24017	0	3.37205	0.0710734	1.14829	?	2	157877683	157878565		1					0
ENSG00000182791	CCDC87	coiled-coil domain containing 87	2.24017	0	3.36651	0.0544344	1.26413	?	11	66590176	66590465							1
ENSG00000100276	RASL10A	RAS like family 10 member A	2.13986	0	3.33736	0.0654432	1.18414	?	22	29313535	29313987							1
ENSG00000105650 #or# ENSG00000285188 /// ENSG00000285188	AC008397.2	NA /// phosphodiesterase 4C #or# NA	2.13986	0	3.33461	0.0895662	1.04786	?	19	18207961	18210928		1					0
ENSG00000260259	LINC02166	long intergenic non-protein coding RNA 2166	5.783	0.73113	3.32574	0.0277395	1.5569	2.98362	16	89682620	89682842			1				0
ENSG00000282885	AL627171.2	NA	2.12884	0	3.31962	0.135312	0.868664	?	14	49861603	49862316		1					0
ENSG00000280832	GSEC	G-quadruplex forming sequence containing lncRNA	5.91006	0.73113	3.30699	0.02532	1.59654	3.01497	11	126350172	126351777							1
ENSG00000275092	AL031710.2	NA	5.54712	0.461841	3.26774	0.0455317	1.34169	3.58627	16	1707252	1707973		1					0
ENSG00000231690	LINC00574	long intergenic non-protein coding RNA 574	2.08889	0	3.25191	0.158424	0.80018	?	6	169800831	169802873			1				0
ENSG00000182747	SLC35D3	solute carrier family 35 member D3	5.43578	0.73113	3.20119	0.0362441	1.44076	2.89429	6	136924697	136925639							1
ENSG00000272681	FAM223B	family with sequence similarity 223 member B (non-protein coding)	2.03322	0	3.18864	0.0872275	1.05935	?	0	154632475	154633182							1
ENSG00000143502	SUSD4	sushi domain containing 4	5.1952	0.461841	3.15252	0.0366457	1.43598	3.49171	1	223358825	223359121							1
ENSG00000243753	HLA-L	major histocompatibility complex, class I, L (pseudogene)	4.21773	0.461841	2.85224	0.0658875	1.1812	3.191	6	30261587	30261703	1						0
ENSG00000245482	AC046130.1	NA	4.06174	0.73113	2.79321	0.07279	1.13793	2.4739	12	34022281	34024134		1					0
ENSG00000215158	AC138409.2	NA	3.86581	0.461841	2.73836	0.0844949	1.07317	3.0653	5	34199797	34200921		1					0
ENSG00000178301	AQP11	aquaporin 11	7.63131	1.19297	2.7256	0.0168008	1.77467	2.67737	11	77609378	77610355							1
ENSG00000204389	HSPA1A	heat shock protein family A (Hsp70) member 1A	7.30361	1.19297	2.72411	0.0189464	1.72247	2.61405	6	31817683	31817946							1
ENSG00000275769	AC068792.1	NA	3.96613	0.73113	2.71685	0.0949588	1.02246	2.43953	12	31443792	31444208		1					0
ENSG00000273243	Z82243.1	NA	3.60951	0.461841	2.69064	0.105532	0.976614	2.96634	22	45155539	45156011		1					0
ENSG00000103154	NECAB2	N-terminal EF-hand calcium binding protein 2	3.56486	0.461841	2.68387	0.0975913	1.01059	2.94838	16	84002347	84002776							1
ENSG00000280353	AC011466.4	NA	3.35321	0.461841	2.65595	0.0807549	1.09283	2.86007	19	48198107	48199720		1					0
ENSG00000260905	AC009021.1	NA	3.65886	0.461841	2.6475	0.111616	0.952274	2.98593	16	22612543	22612887		1					0
ENSG00000111846	GCNT2	glucosaminyl (N-acetyl) transferase 2 (I blood group)	3.65886	0.461841	2.63739	0.102217	0.990478	2.98593	6	10626608	10629368							1
ENSG00000232388 #or# ENSG00000284776	AL121900.2	small integral membrane protein 26 #or# NA	3.82587	0.73113	2.62341	0.0863757	1.06361	2.38759	20	18567453	18567478		1					0
ENSG00000055955 #or# ENSG00000243696 /// ENSG00000055955	ITIH4	inter-alpha-trypsin inhibitor heavy chain family member 4 /// inter-alpha-trypsin inhibitor heavy chain family member 4 #or# NA	3.5139	0.461841	2.61347	0.109618	0.960119	2.9276	3	52829860	52830670							1
ENSG00000268140	PCGF7P	polycomb group ring finger 7 pseudogene	3.34689	0.461841	2.56748	0.10115	0.995033	2.85735	19	22137931	22138981	1						0
ENSG00000137440	FGFBP1	fibroblast growth factor binding protein 1	3.24657	0.73113	2.51052	0.113949	0.943289	2.15072	4	15935569	15935927							1
ENSG00000270182	AC004080.4	NA	3.24657	0.73113	2.50359	0.120934	0.917452	2.15072	7	27158344	27158976		1					0
ENSG00000274667	AC090517.2	NA	3.24657	0.73113	2.49476	0.130502	0.884384	2.15072	15	56729932	56730611		1					0
ENSG00000100867	DHRS2	dehydrogenase/reductase 2	6.09027	0.923681	2.47744	0.0441596	1.35498	2.72104	14	23643045	23645639							1
ENSG00000118690	ARMC2	armadillo repeat containing 2	3.10161	0.73113	2.47322	0.128236	0.891989	2.08482	6	108964980	108965117							1
ENSG00000252947	SCARNA1	small Cajal body-specific RNA 1	3.15096	0.461841	2.45944	0.129347	0.888243	2.77032	1	27834401	27834566							1
ENSG00000189369	GSPT2	G1 to S phase transition 2	3.05064	0.461841	2.44584	0.177889	0.749851	2.72365	0	51745514	51746232							1
ENSG00000188295	ZNF669	zinc finger protein 669	3.00599	0.461841	2.43243	0.140248	0.853103	2.70237	1	247104200	247104365							1
ENSG00000183246	RIMBP3C	RIMS binding protein 3C	2.95032	0.461841	2.41773	0.133378	0.874915	2.67541	22	21545678	21546056							1
ENSG00000264940	SNORD3C	small nucleolar RNA, C/D box 3C	3.06166	0.73113	2.40752	0.130062	0.885851	2.06611	17	19190029	19190245					1		0
ENSG00000176593	AC008969.1	NA	2.93931	0.461841	2.40659	0.166628	0.778251	2.67001	19	58009331	58009930		1					0
ENSG00000228232	GAPDHP1	glyceraldehyde-3-phosphate dehydrogenase pseudogene 1	3.15096	0.73113	2.40611	0.154021	0.81242	2.10759	0	39787132	39788136	1						0
ENSG00000132031	MATN3	matrilin 3	2.88364	0.461841	2.39081	0.152837	0.815771	2.64242	2	19994337	19994409							1
ENSG00000136040	PLXNC1	plexin C1	6.05032	1.19297	2.38679	0.04166	1.38028	2.34245	12	94279472	94279986							1
ENSG00000116329	OPRD1	opioid receptor delta 1	2.93931	0.73113	2.38579	0.12254	0.911721	2.00728	1	28812142	28812383							1
ENSG00000276408	AC025287.2	NA	2.99968	0.461841	2.38493	0.205965	0.686207	2.69934	16	75556392	75557059		1					0
ENSG00000271020	AC112220.2	NA	2.95032	0.73113	2.37246	0.142771	0.84536	2.01267	3	33797149	33797681		1					0
ENSG00000249098	AC055733.1	NA	8.95438	1.65481	2.34999	0.0157542	1.8026	2.43593	3	130918226	130918703		1					0
ENSG00000109927	TECTA	tectorin alpha	2.89936	0.461841	2.34166	0.188521	0.72464	2.65027	11	121190706	121191339							1
ENSG00000234386	OR7E162P	olfactory receptor family 7 subfamily E member 162 pseudogene	2.83899	0.73113	2.33757	0.152724	0.816093	1.95718	4	3901566	3902594	1						0
ENSG00000275236	AC009120.5	NA	2.84369	0.461841	2.33273	0.229924	0.638415	2.6223	16	74289593	74291052		1					0
ENSG00000196189	SEMA4A	semaphorin 4A	2.73867	0.73113	2.32923	0.145888	0.835979	1.90528	1	156176405	156176656							1
ENSG00000242861	AL591895.1	NA	5.74305	1.19297	2.30943	0.0602582	1.21998	2.26726	1	225840883	225841187		1					0
ENSG00000218980	FTH1P15	ferritin heavy chain 1 pseudogene 15	2.79904	0.461841	2.30702	0.178623	0.748063	2.59947	6	57004520	57004799	1						0
ENSG00000283545 /// ENSG00000283414 /// ENSG00000283575 /// ENSG00000283418	RF00026	NA	2.79904	0.461841	2.30236	0.162723	0.78855	2.59947	1	180758722	180758817		1					0
ENSG00000279822	AC016397.2	NA	2.68771	0.461841	2.26926	0.170039	0.769452	2.54091	10	48443836	48445820		1					0
ENSG00000083828	ZNF586	zinc finger protein 586	2.75439	0.73113	2.26116	0.148342	0.828736	1.91353	19	57779348	57780544							1
ENSG00000273802	HIST1H2BG	histone cluster 1 H2B family member g	2.70343	0.461841	2.2459	0.271907	0.56558	2.54932	6	26215159	26216262							1
ENSG00000213590	AL807752.1	NA	2.69872	0.73113	2.23086	0.173655	0.760313	1.88408	9	136935840	136937161		1					0
ENSG00000272767	JMJD1C-AS1	JMJD1C antisense RNA 1	2.53172	0.73113	2.21124	0.157506	0.802702	1.79192	10	63465229	63466563							1
ENSG00000184838	PRR16	proline rich 16	8.06782	1.9241	2.20862	0.0304367	1.5166	2.06799	5	120686710	120686925							1
ENSG00000233057	EEF1A1P14	eukaryotic translation elongation factor 1 alpha 1 pseudogene 14	2.7591	0.461841	2.20538	0.17861	0.748095	2.57873	1	194188967	194190342	1						0
ENSG00000283568 /// ENSG00000278294 /// ENSG00000276871 /// ENSG00000275877 /// ENSG00000283291	RF00002	NA	2.59209	0.461841	2.18198	0.243502	0.613497	2.48865	20	30484925	30485076		1					0
ENSG00000272768	AC004854.2	NA	2.59209	0.461841	2.17464	0.226118	0.645665	2.48865	7	44884953	44886393		1					0
ENSG00000278879	AP000560.1	NA	2.80375	0.73113	2.17094	0.195361	0.709162	1.93916	11	74830574	74832510		1					0
ENSG00000267248	AC025048.2	NA	2.59209	0.461841	2.16276	0.202946	0.692619	2.48865	17	60134622	60135644		1					0
ENSG00000215246	AC116351.1	NA	2.59209	0.461841	2.15999	0.198299	0.702679	2.48865	5	987180	990623		1					0
ENSG00000280160	AC135050.7	NA	2.49177	0.461841	2.14066	0.229817	0.638617	2.43171	16	31093727	31095944		1					0
ENSG00000178917	ZNF852	zinc finger protein 852	2.49177	0.461841	2.13693	0.215734	0.666081	2.43171	3	44499576	44503110							1
ENSG00000229052	AL449283.1	NA	2.43611	0.461841	2.11606	0.215567	0.666419	2.39911	1	92931579	92932091		1					0
ENSG00000250770	AC005865.2	NA	2.43611	0.461841	2.11377	0.19911	0.700906	2.39911	12	3298696	3300441		1					0
ENSG00000175061 #or# ENSG00000277512	SNORD65	LRRC75A antisense RNA 1 #or# small nucleolar RNA, C/D box 65	4.7766	0.923681	2.10975	0.10356	0.984807	2.37052	17	16441226	16441298					1		0
ENSG00000272662	AC073352.1	NA	2.39146	0.461841	2.10736	0.213191	0.67123	2.37242	3	119497678	119498181		1					0
ENSG00000279452	AC006277.1	NA	5.02349	1.46226	2.10618	0.0869054	1.06095	1.78049	19	2949035	2950644		1					0
ENSG00000188124	OR2AG2	olfactory receptor family 2 subfamily AG member 2	2.59209	0.73113	2.10013	0.228559	0.641001	1.82592	11	6767987	6768006							1
ENSG00000162992	NEUROD1	neuronal differentiation 1	2.34681	0.461841	2.09901	0.218599	0.660352	2.34523	2	181676467	181677789							1
ENSG00000225882	LINC01456	long intergenic non-protein coding RNA 1456	2.54744	0.73113	2.09123	0.228112	0.641853	1.80085	0	17970197	17970430			1				0
ENSG00000165060 #or# ENSG00000285130 /// ENSG00000285130	AL358113.1	NA /// frataxin #or# NA	2.33579	0.461841	2.08985	0.20618	0.685753	2.33844	9	69216339	69216366		1					0
ENSG00000109625 #or# ENSG00000155269	CPZ	carboxypeptidase Z #or# G protein-coupled receptor 78	2.33579	0.461841	2.08653	0.241359	0.617337	2.33844	4	8619262	8619487							1
ENSG00000143217	NECTIN4	nectin cell adhesion molecule 4	2.28012	0.461841	2.08312	0.183409	0.73658	2.30364	1	161072140	161072885							1
ENSG00000267741	UBE2L4	ubiquitin conjugating enzyme E2 L4 (pseudogene)	4.98355	1.46226	2.08231	0.0781159	1.10726	1.76897	19	9774497	9774960	1						0
ENSG00000134245	WNT2B	Wnt family member 2B	6.68908	1.38552	2.0719	0.0543197	1.26504	2.27138	1	112516140	112516417							1
ENSG00000275550	AL096712.1	NA	2.28012	0.461841	2.0603	0.294658	0.530682	2.30364	6	37295584	37295742		1					0
ENSG00000244490	RWDD4P1	RWD domain containing 4 pseudogene 1	2.23547	0.461841	2.05991	0.228451	0.641206	2.27511	7	105301522	105302086	1						0
ENSG00000129673	AANAT	aralkylamine N-acetyltransferase	2.44081	0.461841	2.04327	0.256894	0.590246	2.40189	17	76468610	76468632							1
ENSG00000186326	RGS9BP	regulator of G protein signaling 9 binding protein	2.45183	0.461841	2.03963	0.238348	0.622788	2.40839	19	32676972	32678300							1
ENSG00000258813	AL442663.3	NA	2.38514	0.461841	2.03333	0.282874	0.548406	2.36861	14	73057925	73058784		1					0
ENSG00000158445	KCNB1	potassium voltage-gated channel subfamily B member 1	2.38044	0.73113	2.02301	0.251987	0.598622	1.70303	20	49482571	49482646							1
ENSG00000213753 #or# ENSG00000285138	AC016629.3	CENPB DNA-binding domains containing 1 pseudogene 1 #or# NA	2.1798	0.461841	2.02146	0.29744	0.5266	2.23873	19	58581426	58581912		1					0
ENSG00000269907	AL158827.2	NA	2.34049	0.461841	2.02059	0.288056	0.540523	2.34135	9	96910076	96910405		1					0
ENSG00000280033	AC116407.4	NA	2.34049	0.461841	2.01219	0.272655	0.564386	2.34135	17	32159311	32160371		1					0
ENSG00000257135	AC007249.2	NA	1.02212	4.11749	-2.00411	0.172636	0.762868	-2.0102	2	10450436	10450794		1					0
ENSG00000149380	P4HA3	prolyl 4-hydroxylase subunit alpha 3	0.659185	2.65523	-2.00695	0.297095	0.527105	-2.01008	11	74285433	74285985							1
ENSG00000179292	TMEM151A	transmembrane protein 151A	0.866135	3.8482	-2.01176	0.153785	0.813086	-2.15152	11	66295654	66296664							1
ENSG00000203914	HSP90B3P	heat shock protein 90 beta family member 3, pseudogene	3.45823	13.3543	-2.02445	0.00354382	2.45053	-1.9492	1	91642516	91644082	1						0
ENSG00000277744	AC011462.4	NA	1.21805	4.96443	-2.02671	0.0762998	1.11748	-2.02705	19	41373971	41374419		1					0
ENSG00000215914	MMP23A	matrix metallopeptidase 23A (pseudogene)	0.614536	2.65523	-2.03227	0.291215	0.535786	-2.11127	1	1701608	1701782	1						0
ENSG00000049768	FOXP3	forkhead box P3	0.503199	2.38594	-2.03599	0.293773	0.531989	-2.24536	0	49251334	49251336							1
ENSG00000065717	TLE2	transducin like enhancer of split 2	3.05535	11.853	-2.04914	0.00733791	2.13443	-1.95584	19	3019702	3019773							1
ENSG00000255182	AC084125.2	NA	0.714854	2.57849	-2.04926	0.1986	0.702021	-1.85081	8	144499334	144499522		1					0
ENSG00000260747	AC022968.1	NA	0.866135	4.11749	-2.05051	0.116488	0.933719	-2.2491	18	68277802	68278243		1					0
ENSG00000056558	TRAF1	TNF receptor associated factor 1	1.58099	6.34996	-2.06909	0.0361939	1.44136	-2.00592	9	120902393	120905019							1
ENSG00000245970	AP003352.1	NA	0.659185	2.3092	-2.0691	0.14667	0.833658	-1.80864	8	98043735	98044121		1					0
ENSG00000251550	AC091133.4	NA	2.49648	9.46703	-2.07581	0.0145332	1.83764	-1.92302	17	49037122	49037429		1					0
ENSG00000197245	FAM110D	family with sequence similarity 110 member D	0.754799	3.8482	-2.07595	0.139839	0.854372	-2.35002	1	26162108	26163962							1
ENSG00000218682	AC064847.1	NA	0.503199	2.38594	-2.07796	0.379603	0.420671	-2.24536	2	25856461	25856966		1					0
ENSG00000269886	AC022382.1	NA	0.659185	2.57849	-2.08023	0.224757	0.648286	-1.96777	3	9812762	9813097		1					0
ENSG00000104321	TRPA1	transient receptor potential cation channel subfamily A member 1	0.659185	2.57849	-2.09236	0.195825	0.708131	-1.96777	8	72053389	72053867							1
ENSG00000136378	ADAMTS7	ADAM metallopeptidase with thrombospondin type 1 motif 7	1.41398	6.69598	-2.0981	0.0332097	1.47873	-2.24353	15	78770795	78771829							1
ENSG00000089091	DZANK1	double zinc ribbon and ankyrin repeat domains 1	2.09521	8.92845	-2.09819	0.0104986	1.97887	-2.09132	20	18412720	18412853							1
ENSG00000171992	SYNPO	synaptopodin	0.614536	2.57849	-2.09866	0.216569	0.664404	-2.06896	5	150650334	150652337							1
ENSG00000137841	PLCB2	phospholipase C beta 2	1.16238	4.8877	-2.1011	0.0715469	1.14541	-2.07207	15	40303887	40304078							1
ENSG00000234546	LINC01759	long intergenic non-protein coding RNA 1759	1.87253	9.27448	-2.10603	0.00572718	2.24206	-2.30827	1	9191393	9191967			1				0
ENSG00000131080	EDA2R	ectodysplasin A2 receptor	5.13483	23.4743	-2.11385	0.000134723	3.87056	-2.19269	0	66599484	66599486							1
ENSG00000223467	CALM1P1	calmodulin 1 pseudogene 1	0.614536	2.57849	-2.1141	0.169882	0.769853	-2.06896	0	95499604	95500036	1						0
ENSG00000188916	FAM196A	family with sequence similarity 196 member A	0.910785	4.04075	-2.11985	0.0969614	1.0134	-2.14944	10	127136194	127137836							1
ENSG00000213943	KRT18P17	keratin 18 pseudogene 17	0.910785	4.04075	-2.12221	0.107506	0.968569	-2.14944	3	12787393	12788671	1						0
ENSG00000250746	AC105250.1	NA	0.614536	2.92452	-2.14176	0.258438	0.587644	-2.25063	4	164188311	164190367		1					0
ENSG00000237343	AC246785.3	NA	0.810467	4.04075	-2.15052	0.0896108	1.04764	-2.3178	1	144418113	144418370		1					0
ENSG00000258377	AL139099.1	NA	0.558868	2.57849	-2.15193	0.16382	0.785632	-2.20595	14	49620815	49621048		1					0
ENSG00000207472	RNU6-41P	RNA, U6 small nuclear 41, pseudogene	1.06677	4.57933	-2.16451	0.0840367	1.07553	-2.10189	1	182982212	182982318	1						0
ENSG00000269894	AC018809.1	NA	1.78162	7.08109	-2.16686	0.0246438	1.60829	-1.99078	3	9935706	9936258		1					0
ENSG00000270061	AC068790.5	NA	0.659185	2.84778	-2.17211	0.202756	0.693026	-2.11108	12	123969990	123970344		1					0
ENSG00000242083	RPL7AP31	ribosomal protein L7a pseudogene 31	0.659185	2.84778	-2.17607	0.175904	0.754723	-2.11108	4	56356135	56356932	1						0
ENSG00000285184	AC244033.2	NA	0.659185	2.84778	-2.1784	0.160327	0.794993	-2.11108	1	150047834	150047945		1					0
ENSG00000214248	AC010336.1	NA	1.27372	5.69556	-2.18099	0.0678123	1.16869	-2.16079	19	7898804	7903542		1					0
ENSG00000233830	EIF4HP1	eukaryotic translation initiation factor 4H pseudogene 1	0.614536	2.84778	-2.1891	0.152741	0.816045	-2.21227	7	27458163	27458849	1						0
ENSG00000202314	SNORD6	small nucleolar RNA, C/D box 6	0.614536	2.84778	-2.18923	0.141628	0.848852	-2.21227	11	93731502	93731574					1		0
ENSG00000277728	AC097641.2	NA	0.614536	2.84778	-2.18939	0.131757	0.880228	-2.21227	17	73202968	73203431		1					0
ENSG00000260992	DOCK9-DT	DOCK9 divergent transcript	0.754799	4.04075	-2.18975	0.100522	0.997739	-2.42046	13	99087819	99088625							1
ENSG00000267291	AC008649.1	NA	1.37404	5.96485	-2.193	0.0580062	1.23653	-2.11806	19	38601413	38601694		1					0
ENSG00000145020 /// ENSG00000145020 #or# ENSG00000283189	AMT	aminomethyltransferase /// aminomethyltransferase #or# NA	0.503199	2.57849	-2.2001	0.219556	0.658455	-2.35733	3	49421741	49422271							1
ENSG00000196660	SLC30A10	solute carrier family 30 member 10	0.966453	4.2333	-2.20399	0.105217	0.977916	-2.13101	1	219915154	219915448							1
ENSG00000227071	FOCAD-AS1	FOCAD antisense RNA 1	0.815171	3.04033	-2.21843	0.16542	0.781413	-1.89905	9	20683389	20683541							1
ENSG00000244161	FLNB-AS1	FLNB antisense RNA 1	1.425	7.50385	-2.21844	0.0373874	1.42727	-2.39667	3	58163973	58164312							1
ENSG00000224349	AL365226.1	NA	0.558868	2.84778	-2.22354	0.139025	0.856908	-2.34926	6	70412828	70413062		1					0
ENSG00000163702	IL17RC	interleukin 17 receptor C	0.558868	2.84778	-2.22436	0.141329	0.849767	-2.34926	3	9932608	9932958							1
ENSG00000270681	AC095055.1	NA	0.558868	2.84778	-2.22474	0.142422	0.846424	-2.34926	4	151139991	151141103		1					0
ENSG00000268144	NIFKP6	nucleolar protein interacting with the FHA domain of MKI67 pseudogene 6	1.06677	4.50259	-2.22674	0.0820056	1.08616	-2.07751	19	51396755	51397109	1						0
ENSG00000255366	AC120036.4	NA	1.11774	5.69556	-2.2288	0.0429478	1.36706	-2.34926	8	47190772	47193262		1					0
ENSG00000116661	FBXO2	F-box protein 2	1.06207	5.69556	-2.23431	0.0304606	1.51626	-2.42296	1	11650737	11650834							1
ENSG00000234432	AC092171.3	NA	0.558868	2.84778	-2.23791	0.184024	0.735126	-2.34926	7	5426277	5428927		1					0
ENSG00000260325	HSPB9	heat shock protein family B (small) member 9	0.503199	2.84778	-2.25886	0.138325	0.859098	-2.50064	17	42123331	42123352							1
ENSG00000233967	AL359715.1	NA	0.659185	3.11707	-2.26457	0.21631	0.664924	-2.24144	6	80462872	80463207		1					0
ENSG00000213760	ATP6V1G2	ATPase H+ transporting V1 subunit G2	0.966453	4.50259	-2.26514	0.0731368	1.13586	-2.21998	6	31545756	31546209							1
ENSG00000149573	MPZL2	myelin protein zero like 2	1.02212	4.77188	-2.28358	0.0874443	1.05827	-2.22299	11	118262720	118262850							1
ENSG00000006747	SCIN	scinderin	0.910785	4.84862	-2.30564	0.0908093	1.04187	-2.41239	7	12625762	12626541							1
ENSG00000227165	WDR11-AS1	WDR11 antisense RNA 1	0.558868	2.77104	-2.30949	0.167784	0.77525	-2.30985	10	120821203	120821354							1
ENSG00000272888 #or# ENSG00000279765 /// ENSG00000279765	AC013394.1	NA /// long intergenic non-protein coding RNA 1578 #or# NA	0.558868	3.11707	-2.31934	0.156231	0.806232	-2.47961	15	92948952	92949230		1					0
ENSG00000272097	AL024498.1	NA	0.815171	3.30962	-2.32165	0.123056	0.909898	-2.02149	6	10746953	10747229		1					0
ENSG00000239474	KLHL41	kelch like family member 41	0.866135	4.77188	-2.3421	0.0543713	1.26463	-2.46189	2	169520861	169521007							1
ENSG00000175197	DDIT3	DNA damage inducible transcript 3	39.3023	205.349	-2.36242	1.25746e-29	28.9005	-2.38539	12	57517476	57517542							1
ENSG00000277491	AC087392.5	NA	0.503199	3.11707	-2.36341	0.150793	0.821618	-2.63099	17	795306	795794		1					0
ENSG00000099958	DERL3	derlin 3	20.8591	104.674	-2.36373	5.791e-16	15.2372	-2.32716	22	23836767	23837154							1
ENSG00000237922	AL450309.1	NA	0.921804	4.69514	-2.36588	0.0872651	1.05916	-2.34864	1	236285976	236286276		1					0
ENSG00000253346	AC109329.1	NA	0.558868	3.38636	-2.38577	0.126936	0.896416	-2.59916	8	30331961	30332277		1					0
ENSG00000206975	RNU6-13P	RNA, U6 small nuclear 13, pseudogene	1.32939	6.61925	-2.39244	0.0338965	1.46984	-2.3159	8	56917084	56917190	1						0
ENSG00000262772	LINC01977	long intergenic non-protein coding RNA 1977	0.558868	3.04033	-2.39864	0.103257	0.986081	-2.44365	17	79826084	79827704			1				0
ENSG00000250917 /// ENSG00000101444 #or# ENSG00000250917	AL035458.2	adenosylhomocysteinase #or# NA /// NA	0.614536	3.30962	-2.42933	0.0896164	1.04761	-2.4291	20	34234840	34235030		1					0
ENSG00000103489	XYLT1	xylosyltransferase 1	1.56527	9.46703	-2.43272	0.012504	1.90295	-2.5965	16	17355228	17355415							1
ENSG00000249306	LINC01411	long intergenic non-protein coding RNA 1411	0.714854	3.8482	-2.50565	0.0664679	1.17739	-2.42846	5	174532035	174532457			1				0
ENSG00000166446	CDYL2	chromodomain Y like 2	1.02212	5.42627	-2.5089	0.0640446	1.19352	-2.4084	16	80684604	80685129							1
ENSG00000280286	FRG1KP	FSHD region gene 1 family member K, pseudogene	0.503199	3.30962	-2.50895	0.118752	0.925361	-2.71746	9	65646982	65647018	1						0
ENSG00000246528	AC079089.1	NA	0.558868	3.57891	-2.52026	0.0811816	1.09054	-2.67894	8	69854672	69854971		1					0
ENSG00000182511	FES	FES proto-oncogene, tyrosine kinase	0.558868	3.57891	-2.53571	0.102559	0.989026	-2.67894	15	90890366	90890525							1
ENSG00000274756	AC243732.1	NA	0.558868	3.57891	-2.55809	0.147384	0.83155	-2.67894	17	36574462	36575325		1					0
ENSG00000231615	AL645568.2	NA	0.714854	3.77146	-2.56259	0.100871	0.996232	-2.3994	1	173362397	173363733		1					0
ENSG00000275713	HIST1H2BH	histone cluster 1 H2B family member h	0.659185	3.50217	-2.56281	0.0780026	1.10789	-2.40949	6	26252032	26253710							1
ENSG00000237505	PKN2-AS1	PKN2 antisense RNA 1	0.810467	5.15699	-2.57432	0.0623584	1.20511	-2.6697	1	88540303	88540659							1
ENSG00000153563	CD8A	CD8a molecule	0.910785	5.42627	-2.58313	0.028761	1.5412	-2.57478	2	86785920	86785922							1
ENSG00000283010	AL589826.2	NA	0.407586	2.19339	-2.59954	0.227651	0.64273	-2.42799	6	98829967	98830409		1					0
ENSG00000155749	ALS2CR12	amyotrophic lateral sclerosis 2 chromosome region 12	0.307268	2.11665	-2.64898	0.450632	0.346178	-2.78422	2	201351405	201351451							1
ENSG00000199150	MIRLET7G	microRNA let-7g	0.2516	2.19339	-2.65452	0.390953	0.407875	-3.12396	3	52268278	52268361				1			0
ENSG00000273464	AP000238.1	NA	0.307268	2.11665	-2.65565	0.326969	0.485494	-2.78422	21	29657406	29657831		1					0
ENSG00000243795	LINC02044	long intergenic non-protein coding RNA 2044	0.2516	2.11665	-2.65962	0.277912	0.556092	-3.07258	3	113142350	113144335			1				0
ENSG00000172404	DNAJB7	DnaJ heat shock protein family (Hsp40) member B7	0.307268	2.11665	-2.66289	0.245902	0.609237	-2.78422	22	40859549	40861064							1
ENSG00000175564	UCP3	uncoupling protein 3	0.407586	2.11665	-2.66376	0.238385	0.622721	-2.37661	11	74007043	74007304							1
ENSG00000270604 /// ENSG00000231074 #or# ENSG00000270604	HCG17	HLA complex group 18 (non-protein coding) #or# HLA complex group 17 (non-protein coding) /// HLA complex group 17 (non-protein coding)	0.307268	2.11665	-2.67355	0.173698	0.760205	-2.78422	6	30234039	30234268							1
ENSG00000078795	PKD2L2	polycystin 2 like 2, transient receptor potential cation channel	0.2516	2.11665	-2.67409	0.170972	0.767075	-3.07258	5	137894353	137894355							1
ENSG00000267332	BOLA3P2	bolA family member 3 pseudogene 2	0.614536	4.11749	-2.67468	0.155413	0.808513	-2.7442	19	9019787	9019984	1						0
ENSG00000143850	PLEKHA6	pleckstrin homology domain containing A6	0.407586	2.11665	-2.67874	0.149894	0.824216	-2.37661	1	204273626	204273740							1
ENSG00000150722	PPP1R1C	protein phosphatase 1 regulatory inhibitor subunit 1C	0.307268	2.11665	-2.68188	0.137861	0.86056	-2.78422	2	182117207	182117917							1
ENSG00000225462	FDPSP1	farnesyl diphosphate synthase pseudogene 1	0.407586	2.11665	-2.6836	0.131891	0.879785	-2.37661	1	187563061	187564131	1						0
ENSG00000168427	KLHL30	kelch like family member 30	0.307268	2.11665	-2.68417	0.129986	0.886104	-2.78422	2	238151066	238152947							1
ENSG00000233707	RPL22P11	ribosomal protein L22 pseudogene 11	0.2516	2.11665	-2.68485	0.127822	0.893393	-3.07258	2	109737139	109737523	1						0
ENSG00000273456	AC064836.3	NA	0.407586	2.11665	-2.69674	0.0970789	1.01288	-2.37661	2	202374932	202375604		1					0
ENSG00000275630	AC004816.2	NA	0.503199	3.77146	-2.71805	0.111353	0.953299	-2.90592	14	70823820	70823984		1					0
ENSG00000198987	MIR16-2	microRNA 16-2	0.866135	6.31088	-2.76748	0.107607	0.968158	-2.86518	3	160404745	160404825				1			0
ENSG00000270720	AC104785.1	NA	0.307268	2.38594	-2.7848	0.127515	0.89444	-2.95699	4	89119284	89119871		1					0
ENSG00000251221	LINC01337	long intergenic non-protein coding RNA 1337	0.307268	2.38594	-2.78634	0.134653	0.870783	-2.95699	5	80608623	80608945			1				0
ENSG00000178162	FAR2P2	fatty acyl-CoA reductase 2 pseudogene 2	0.307268	2.38594	-2.78738	0.139886	0.854225	-2.95699	2	130426192	130426263	1						0
ENSG00000234779	BNC2-AS1	BNC2 antisense RNA 1	0.407586	2.38594	-2.78757	0.140879	0.851153	-2.54938	9	16727315	16727524							1
ENSG00000223714	AL109797.1	NA	0.307268	2.38594	-2.78775	0.141848	0.848178	-2.95699	0	41276089	41276778		1					0
ENSG00000166046	TCP11L2	t-complex 11 like 2	0.2516	2.38594	-2.78877	0.147539	0.831093	-3.24536	12	106323938	106324056							1
ENSG00000134873	CLDN10	claudin 10	0.407586	2.38594	-2.78899	0.148787	0.827434	-2.54938	13	95560468	95560938							1
ENSG00000231064	AC234582.1	NA	0.2516	2.38594	-2.78982	0.153788	0.813078	-3.24536	1	155205035	155205367		1					0
ENSG00000159784	FAM131B	family with sequence similarity 131 member B	0.2516	2.38594	-2.79086	0.160453	0.794652	-3.24536	7	143358887	143359024							1
ENSG00000255107	AC079089.2	NA	0.2516	2.38594	-2.79379	0.182278	0.739267	-3.24536	8	69859264	69860540		1					0
ENSG00000242608	RPS23P5	ribosomal protein S23 pseudogene 5	0.307268	2.38594	-2.79445	0.18795	0.725958	-2.95699	5	13250235	13250662	1						0
ENSG00000243709	LEFTY1	left-right determination factor 1	0.307268	2.38594	-2.79779	0.221904	0.653835	-2.95699	1	225887977	225888032							1
ENSG00000163885	CFAP100	cilia and flagella associated protein 100	0.407586	2.38594	-2.79784	0.222539	0.652594	-2.54938	3	126436291	126436556							1
ENSG00000272933	AL391121.1	NA	1.06677	6.88854	-2.8331	0.0208977	1.6799	-2.69095	10	102642792	102644140		1					0
ENSG00000176532	PRR15	proline rich 15	0.2516	2.65523	-2.8381	0.0723598	1.1405	-3.39964	7	29566185	29566329							1
ENSG00000028277	POU2F2	POU class 2 homeobox 2	0.614536	4.50259	-2.859	0.0377891	1.42263	-2.87319	19	42122093	42122182							1
ENSG00000213144	AC084880.1	NA	0.2516	2.65523	-2.86753	0.0910519	1.04071	-3.39964	12	119194850	119195394		1					0
ENSG00000285244	DINOL	damage induced long noncoding RNA	0.910785	6.88854	-2.88784	0.00846694	2.07227	-2.91901	6	36677609	36678559							1
ENSG00000214961	FO393409.1	NA	0.2516	2.65523	-2.92831	0.210489	0.676771	-3.39964	0	134272287	134273658		1					0
ENSG00000272183	AC005041.3	NA	0.307268	2.57849	-2.94668	0.236622	0.625945	-3.06896	2	74501717	74502365		1					0
ENSG00000123892	RAB38	RAB38, member RAS oncogene family	0.407586	2.57849	-2.9553	0.172869	0.762282	-2.66135	11	88113612	88113987							1
ENSG00000100985	MMP9	matrix metallopeptidase 9	0.407586	2.57849	-2.95963	0.150214	0.823289	-2.66135	20	46016369	46016561							1
ENSG00000251470	ASNSP4	asparagine synthetase pseudogene 4	0.2516	2.57849	-2.96381	0.132276	0.87852	-3.35733	8	46698479	46698688	1						0
ENSG00000270030	AC136475.7	NA	0.407586	2.92452	-3.03721	0.158773	0.799223	-2.84302	11	325703	326294		1					0
ENSG00000155093	PTPRN2	protein tyrosine phosphatase, receptor type N2	0.307268	2.84778	-3.06416	0.0567089	1.24635	-3.21227	7	158110825	158110827							1
ENSG00000111913	RIPOR2	RHO family interacting cell polarization regulator 2	0.307268	2.84778	-3.06422	0.0577666	1.23832	-3.21227	6	25014952	25015583							1
ENSG00000242882	RPL5P11	ribosomal protein L5 pseudogene 11	0.407586	2.84778	-3.06429	0.0589686	1.22938	-2.80466	4	173419245	173420137	1						0
ENSG00000243886	AC117440.1	NA	0.307268	2.84778	-3.0645	0.0629029	1.20133	-3.21227	3	137535572	137536142		1					0
ENSG00000241404	EGFL8	EGF like domain multiple 8	0.2516	2.84778	-3.06538	0.0859057	1.06598	-3.50064	6	32167910	32168281							1
ENSG00000230732	AC016949.1	NA	0.2516	2.84778	-3.06545	0.0881396	1.05483	-3.50064	3	196913860	196914579		1					0
ENSG00000198242 #or# ENSG00000238597	SNORD4B	ribosomal protein L23a #or# small nucleolar RNA, C/D box 4B	0.307268	2.84778	-3.06569	0.0972973	1.0119	-3.21227	17	28723682	28723753					1		0
ENSG00000257556	LINC02298	long intergenic non-protein coding RNA 2298	0.558868	5.23372	-3.08178	0.0221971	1.6537	-3.22726	14	105095540	105095767			1				0
ENSG00000178726	THBD	thrombomodulin	0.659185	5.57975	-3.09096	0.0716571	1.14474	-3.08144	20	23045633	23047776							1
ENSG00000220205 #or# ENSG00000263620	AC129492.3	vesicle associated membrane protein 2 #or# NA	0.307268	3.11707	-3.1372	0.0528361	1.27707	-3.34262	17	8162880	8162975		1					0
ENSG00000282851 /// ENSG00000141971 #or# ENSG00000282851	BISPR	multivesicular body subunit 12A #or# BST2 interferon stimulated positive regulator (non-protein coding) /// BST2 interferon stimulated positive regulator (non-protein coding)	0.307268	3.11707	-3.17345	0.142437	0.846376	-3.34262	19	17414136	17414347							1
ENSG00000114841	DNAH1	dynein axonemal heavy chain 1	0.558868	5.42627	-3.17664	0.0186102	1.73025	-3.27938	3	52395308	52395409							1
ENSG00000262420	AC007613.1	NA	0.2516	3.38636	-3.22032	0.0522577	1.28185	-3.75053	16	11741910	11744506		1					0
ENSG00000207605	MIR191	microRNA 191	0.307268	3.38636	-3.2726	0.120806	0.917913	-3.46217	3	49020618	49020709				1			0
ENSG00000129910	CDH15	cadherin 15	0.614536	6.23414	-3.29127	0.0317606	1.49811	-3.34262	16	89195156	89195492							1
ENSG00000279879	AC091152.4	NA	0.407586	3.30962	-3.29434	0.0876637	1.05718	-3.02149	17	44689858	44693340		1					0
ENSG00000235787	AC092047.1	NA	0.307268	3.30962	-3.298	0.0556048	1.25489	-3.4291	3	42469640	42469879		1					0
ENSG00000278952	AP003068.4	NA	0.307268	3.30962	-3.30276	0.0352721	1.45257	-3.4291	11	65118310	65119111		1					0
ENSG00000205795	CYS1	cystin 1	0.307268	3.57891	-3.36702	0.0351832	1.45367	-3.54195	2	10058614	10058958							1
ENSG00000227953	LINC01341	long intergenic non-protein coding RNA 1341	0.2516	3.57891	-3.37175	0.0439969	1.35658	-3.83032	1	246792057	246792385			1				0
ENSG00000199072	MIRLET7F1	microRNA let-7f-1	0.407586	3.57891	-3.38218	0.0852423	1.06934	-3.13435	9	94176347	94176433				1			0
ENSG00000142961	MOB3C	MOB kinase activator 3C	0.2516	3.8482	-3.44124	0.0374203	1.42689	-3.93498	1	46610002	46610204							1
ENSG00000272405	AL365181.3	NA	0.2516	3.8482	-3.45687	0.0548406	1.2609	-3.93498	1	156641666	156644887		1					0
ENSG00000250091	DNAH10OS	dynein axonemal heavy chain 10 opposite strand	0.407586	3.8482	-3.46181	0.0635349	1.19699	-3.23901	12	123926424	123930543							1
ENSG00000261766	AC133550.2	NA	0.307268	3.8482	-3.48331	0.152852	0.815728	-3.64662	16	28862166	28862530		1					0
ENSG00000152208	GRID2	glutamate ionotropic receptor delta type subunit 2	0.2516	3.77146	-3.49339	0.0495813	1.30468	-3.90592	4	93806874	93810157							1
ENSG00000235218	AC092638.2	NA	0	2.19339	-3.53596	0.0740772	1.13032	?	2	193276668	193277614		1					0
ENSG00000279204 /// ENSG00000245812 #or# ENSG00000279204	AC134043.2	NA /// long intergenic non-protein coding RNA 2202 #or# NA	0	2.19339	-3.59669	0.165432	0.78138	?	5	159106380	159108617		1					0
ENSG00000270083	AL021878.2	NA	0.2516	3.96401	-3.61565	0.025115	1.60007	-3.97776	22	42089630	42090028		1					0
ENSG00000223652	AC106786.1	NA	0	2.19339	-3.61887	0.256977	0.590106	?	5	123087634	123087939		1					0
ENSG00000199552	RF00092	NA	0	2.11665	-3.62043	0.148524	0.828203	?	3	183453814	183453944		1					0
ENSG00000176697	BDNF	brain derived neurotrophic factor	0	2.19339	-3.62188	0.275597	0.559726	?	11	27654893	27657820							1
ENSG00000198768	APCDD1L	APC down-regulated 1 like	0	2.11665	-3.62505	0.111681	0.952021	?	20	58513899	58513987							1
ENSG00000214455	RCN1P2	reticulocalbin 1 pseudogene 2	0	2.11665	-3.6254	0.10944	0.960823	?	13	45390353	45391267	1						0
ENSG00000212027	MIR374B	microRNA 374b	0	2.19339	-3.6261	0.305704	0.514699	?	0	74218547	74218618				1			0
ENSG00000256293	AC135279.2	NA	0	2.11665	-3.62924	0.0881268	1.05489	?	12	64338178	64338797		1					0
ENSG00000188869	TMC3	transmembrane channel like 3	0.307268	4.31004	-3.63056	0.0302461	1.51933	-3.81013	15	81337642	81337924							1
ENSG00000278993	AC002350.1	NA	0	2.11665	-3.63056	0.0821031	1.08564	?	12	110501614	110503441		1					0
ENSG00000269420	PLA2G4C-AS1	PLA2G4C antisense RNA 1	0	2.19339	-3.63238	0.361993	0.4413	?	19	48061913	48062222							1
ENSG00000101282	RSPO4	R-spondin 4	0	2.19339	-3.63368	0.375889	0.42494	?	20	960254	960356							1
ENSG00000268364	SMC5-AS1	SMC5 antisense RNA 1 (head to head)	0	2.11665	-3.63626	0.0614787	1.21128	?	9	70193997	70194555							1
ENSG00000200211	RNY4P27	RNA, Ro-associated Y4 pseudogene 27	0	2.19339	-3.63975	0.455108	0.341886	?	13	95336106	95336201	1						0
ENSG00000165076	PRSS37	serine protease 37	0	2.19339	-3.64192	0.491067	0.308859	?	7	141836359	141836535							1
ENSG00000199094	MIR30C2	microRNA 30c-2	0	2.19339	-3.64192	0.491067	0.308859	?	6	71376960	71377031				1			0
ENSG00000118898	PPL	periplakin	0	2.11665	-3.64457	0.0421261	1.37545	?	16	4892755	4893370							1
ENSG00000253854	AC010834.3	NA	0	2.38594	-3.73789	0.0256568	1.5908	?	8	93720769	93721167		1					0
ENSG00000224358	AL451074.2	NA	0	2.38594	-3.75613	0.0761772	1.11818	?	1	165773474	165775176		1					0
ENSG00000246792	AC106038.1	NA	0	2.38594	-3.7576	0.0855229	1.06792	?	8	90656514	90656598		1					0
ENSG00000224888	AC138028.2	NA	0	2.38594	-3.7624	0.130464	0.88451	?	16	88738504	88741425		1					0
ENSG00000271973	AC141002.1	NA	0	2.38594	-3.7627	0.134282	0.871981	?	3	48672455	48672733		1					0
ENSG00000279115	AC006386.2	NA	0	2.38594	-3.77112	0.375018	0.425948	?	0	25307729	25307803		1					0
ENSG00000128422	KRT17	keratin 17	0.2516	4.77188	-3.78325	0.0126994	1.89622	-4.24536	17	41622873	41623032							1
ENSG00000261105	LMO7-AS1	LMO7 antisense RNA 1	0	2.65523	-3.838	0.0277041	1.55746	?	13	75604826	75604945							1
ENSG00000085514	PILRA	paired immunoglobin like type 2 receptor alpha	0	2.3092	-3.86118	0.0246552	1.60809	?	7	100376121	100376413							1
ENSG00000281741	AC241377.3	NA	0.307268	4.96443	-3.88449	0.0105688	1.97597	-4.01406	1	120913184	120914238		1					0
ENSG00000262319	AC007952.6	NA	0	2.65523	-3.88964	0.0947943	1.02322	?	17	19141017	19143689		1					0
ENSG00000184731	FAM110C	family with sequence similarity 110 member C	0	2.65523	-3.90603	0.177423	0.750989	?	2	41221	41627							1
ENSG00000198974	MIR30E	microRNA 30e	0	2.65523	-3.92001	0.374073	0.427044	?	1	40754355	40754446				1			0
ENSG00000167601	AXL	AXL receptor tyrosine kinase	0.407586	5.50301	-3.97011	0.00609838	2.21479	-3.75505	19	41259905	41260204							1
ENSG00000247809	NR2F2-AS1	NR2F2 antisense RNA 1	0.2516	5.42627	-4.02141	0.00733571	2.13456	-4.43076	15	96290445	96290783							1
ENSG00000227361	RPS24P7	ribosomal protein S24 pseudogene 7	0	2.92452	-4.02205	0.108778	0.96346	?	2	61803143	61803388	1						0
ENSG00000162004	CCDC78	coiled-coil domain containing 78	0	2.84778	-4.02654	0.0166241	1.77926	?	16	725123	725293							1
ENSG00000152292	SH2D6	SH2 domain containing 6	0	2.84778	-4.02884	0.0928846	1.03206	?	2	85436466	85436738							1
ENSG00000156968	MPV17L	MPV17 mitochondrial inner membrane protein like	0	2.84778	-4.0298	0.358115	0.445977	?	16	15407933	15408118							1
ENSG00000189149	CRYM-AS1	CRYM antisense RNA 1	0	3.11707	-4.11555	0.0205333	1.68754	?	16	21338924	21339037							1
ENSG00000189409	MMP23B	matrix metallopeptidase 23B	0	3.57891	-4.33004	0.00738629	2.13157	?	1	1635159	1635263							1
ENSG00000267226	AC104971.1	NA	0	3.57891	-4.33638	0.0122703	1.91114	?	18	58670009	58670808		1					0
ENSG00000274536 #or# ENSG00000284567	AL034397.3	NA #or# microRNA 223	0.2516	7.04201	-4.33849	0.0232873	1.63288	-4.80679	0	66018824	66020422		1					0
ENSG00000106714 #or# ENSG00000243695 /// ENSG00000106714	CNTNAP3	contactin associated protein like 3 /// contactin associated protein like 3 #or# NA	0.2516	7.08109	-4.4094	0.00125637	2.90088	-4.81477	9	39172786	39174540							1
ENSG00000201470	RNY4P7	RNA, Ro-associated Y4 pseudogene 7	0	5.04117	-4.80334	0.00220523	2.65655	?	2	127798903	127798998	1						0
ENSG00000273189	AC010619.2	NA	0	5.69556	-5.02599	0.000371349	3.43022	?	19	49487017	49487637		1					0
