# Supplementary material for: MLL-AF4 and a murinized pSer-variant thereof are turning on the nucleolar stress pathway
Source: Cell Biosci. 2022 Apr 25;12:47. doi: 10.1186/s13578-022-00781-y (PMC9036721; doi:10.1186/s13578-022-00781-y)
Supplement: Supplementary file 2 — Additional file 2: MA4m gene signature [file 13578_2022_781_MOESM2_ESM.xlsx]

## Sheet: Sheet1
ID	gene symbol	gene name	mean exp	mean Mock	log2	pvalue	minus log 10	log2 rolf	chrom	Anfang	Ende	PG	NA	LINC	MIR	SNO	MT	ProCodG
ENSG00000274997	HIST1H2AH	histone cluster 1 H2A family member h	6.06901	0	4.82827	0.0026659	2.57416	?	6	27147513	27147515							1
ENSG00000200488	RN7SKP203	RNA, 7SK small nuclear pseudogene 203	39.1145	1.65481	4.53225	1.81523e-05	4.74107	4.56296	2	76445079	76445410	1						0
ENSG00000232531	AC027612.3	NA	3.83263	0	4.16474	0.0302684	1.51901	?	2	91747940	91748986		1					0
ENSG00000271394	RF00100	NA	17.1466	0.923681	3.98179	0.00321413	2.49294	4.21438	6	52995620	52995950		1					0
ENSG00000257272	AL162311.1	NA	2.90907	0	3.76444	0.0985163	1.00649	?	14	35874780	35875303		1					0
ENSG00000260461	AL133355.1	NA	2.88465	0	3.75385	0.075437	1.12242	?	10	103877374	103879761		1					0
ENSG00000228150	AL357140.2	NA	2.87651	0	3.75099	0.0269449	1.56952	?	1	9949638	9949974		1					0
ENSG00000230626	AC011005.1	NA	2.87651	0	3.75063	0.0512723	1.29012	?	7	129130749	129130793		1					0
ENSG00000162482	AKR7A3	aldo-keto reductase family 7 member A3	2.86837	0	3.74781	0.0430346	1.36618	?	1	19282558	19282730							1
ENSG00000266173	STRADA	STE20-related kinase adaptor alpha	2.86837	0	3.74731	0.063705	1.19583	?	17	63725704	63728413							1
ENSG00000248122	APOOP4	apolipoprotein O pseudogene 4	2.86023	0	3.74405	0.0646852	1.1892	?	4	68304343	68304939	1						0
ENSG00000201428	RN7SKP71	RNA, 7SK small nuclear pseudogene 71	52.9871	4.2333	3.60349	0.000500506	3.30059	3.64579	12	112267077	112267394	1						0
ENSG00000235546	AC087499.4	NA	2.5768	0	3.58792	0.0449713	1.34706	?	17	20612667	20614008		1					0
ENSG00000271002	AC129492.5	NA	2.56865	0	3.58627	0.144675	0.839607	?	17	8199123	8199437		1					0
ENSG00000148848	ADAM12	ADAM metallopeptidase domain 12	2.56865	0	3.58593	0.0908586	1.04163	?	10	126135368	126135660							1
ENSG00000272156	AC008280.3	NA	2.56865	0	3.58578	0.0775868	1.11021	?	2	54084570	54085066		1					0
ENSG00000162390	ACOT11	acyl-CoA thioesterase 11	2.55237	0	3.57958	0.0397378	1.4008	?	1	54599296	54599658							1
ENSG00000272681	FAM223B	family with sequence similarity 223 member B (non-protein coding)	2.55237	0	3.57896	0.0596264	1.22456	?	0	154632475	154633182							1
ENSG00000205041	AC118344.1	NA	2.55237	0	3.57846	0.102197	0.99056	?	19	40273489	40273630		1					0
ENSG00000117595	IRF6	interferon regulatory factor 6	2.55237	0	3.5784	0.110918	0.954998	?	1	209790738	209790887							1
ENSG00000272940	U62317.4	NA	2.55237	0	3.57813	0.173957	0.759557	?	22	50597152	50597599		1					0
ENSG00000199135	MIR101-1	microRNA 101-1	2.26894	0	3.40737	0.490466	0.309391	?	1	65058434	65058508				1			0
ENSG00000160117	ANKLE1	ankyrin repeat and LEM domain containing 1	2.2608	0	3.40043	0.137812	0.860713	?	19	17282864	17283177							1
ENSG00000187808	SOWAHD	sosondowah ankyrin repeat domain family member D	2.2608	0	3.39975	0.106992	0.97065	?	0	119759616	119760164							1
ENSG00000273233	AC097724.1	NA	2.25266	0	3.39729	0.557796	0.253524	?	2	28810281	28810706		1					0
ENSG00000105877	DNAH11	dynein axonemal heavy chain 11	2.2608	0	3.39713	0.0573875	1.24118	?	7	21901007	21901116							1
ENSG00000204577	LILRB3	leukocyte immunoglobulin like receptor B3	2.25266	0	3.39617	0.144394	0.840451	?	19	54222977	54223087							1
ENSG00000273598	AC211486.3	NA	2.25266	0	3.39569	0.107403	0.968985	?	7	75316048	75316140		1					0
ENSG00000243759	ST13P15	ST13, Hsp70 interacting protein pseudogene 15	2.25266	0	3.39494	0.0760015	1.11918	?	3	143517123	143518229	1						0
ENSG00000117601	SERPINC1	serpin family C member 1	2.24452	0	3.3921	0.355047	0.449714	?	1	173911980	173912014							1
ENSG00000249819	AC112240.1	NA	2.24452	0	3.39202	0.26035	0.584442	?	4	157204462	157204855		1					0
ENSG00000130600	H19	H19, imprinted maternally expressed transcript (non-protein coding)	2.24452	0	3.39182	0.152505	0.816716	?	11	1997076	1997514							1
ENSG00000237877	LINC01473	long intergenic non-protein coding RNA 1473	2.24452	0	3.39178	0.139864	0.854294	?	2	186033531	186033802			1				0
ENSG00000248854	HNRNPH1P3	heterogeneous nuclear ribonucleoprotein H1 pseudogene 3	2.24452	0	3.39164	0.109756	0.95957	?	5	55838801	55840025	1						0
ENSG00000273493	AC098479.1	NA	2.24452	0	3.39149	0.089078	1.05023	?	3	58329965	58330118		1					0
ENSG00000258334	AC125611.4	NA	2.24452	0	3.39141	0.080851	1.09231	?	12	49292631	49293896		1					0
ENSG00000188316	ENO4	enolase 4	2.24452	0	3.39139	0.0793152	1.10064	?	10	116911573	116911788							1
ENSG00000182791	CCDC87	coiled-coil domain containing 87	2.23638	0	3.38802	0.0582416	1.23477	?	11	66590176	66590465							1
ENSG00000269692	FKBP4P2	FK506 binding protein 4 pseudogene 2	2.23638	0	3.3878	0.0740274	1.13061	?	9	39631046	39632416	1						0
ENSG00000170827	CELP	carboxyl ester lipase pseudogene	2.23638	0	3.38727	0.215208	0.667142	?	9	133086786	133087253	1						0
ENSG00000267742	SINHCAFP2	SINHCAF pseudogene 2	2.23638	0	3.38724	0.230672	0.637004	?	18	60016778	60017441	1						0
ENSG00000250329	KDELC1P1	KDEL motif containing 1 pseudogene 1	2.22824	0	3.38462	0.0656247	1.18293	?	5	128109486	128110994	1						0
ENSG00000246350	AL049543.1	NA	2.22824	0	3.38285	0.166586	0.778363	?	6	28589229	28591747		1					0
ENSG00000224509	AC010884.1	NA	2.2201	0	3.38182	0.0599609	1.22213	?	2	104936241	104936765		1					0
ENSG00000083635 #or# ENSG00000223732	AL359706.1	NUFIP1, FMR1 interacting protein 1 #or# NA	2.2201	0	3.38065	0.0764505	1.11662	?	13	44982077	44982154		1					0
ENSG00000224035	SFPQP1	splicing factor proline and glutamine rich pseudogene 1	2.21196	0	3.37147	0.560824	0.251174	?	0	13094575	13095805	1						0
ENSG00000280832	GSEC	G-quadruplex forming sequence containing lncRNA	5.43702	0.73113	3.23259	0.0307421	1.51227	2.89462	11	126350172	126351777							1
ENSG00000200312	RN7SKP255	RNA, 7SK small nuclear pseudogene 255	16.798	1.9241	3.19685	0.0493607	1.30662	3.12603	14	89712511	89712823	1						0
ENSG00000274705	MIR486-1	microRNA 486-1	11.6607	1.46226	3.18605	0.0471463	1.32655	2.99538	8	41660441	41660508				1			0
ENSG00000143502	SUSD4	sushi domain containing 4	5.09661	0.461841	3.16245	0.0384244	1.41539	3.46407	1	223358825	223359121							1
ENSG00000233057	EEF1A1P14	eukaryotic translation elongation factor 1 alpha 1 pseudogene 14	4.78875	0.461841	3.07761	0.0605925	1.21758	3.37418	1	194188967	194190342	1						0
ENSG00000204389	HSPA1A	heat shock protein family A (Hsp70) member 1A	9.60193	1.19297	3.0758	0.00868004	2.06148	3.00877	6	31817683	31817946							1
ENSG00000251235	SNRPCP2	small nuclear ribonucleoprotein polypeptide C pseudogene 2	4.18119	0.461841	2.88853	0.111796	0.951572	3.17845	5	76376675	76377149	1						0
ENSG00000074527	NTN4	netrin 4	4.18119	0.461841	2.87549	0.0727324	1.13827	3.17845	12	95787413	95787468							1
ENSG00000202198 #or# ENSG00000283293	RN7SK	NA #or# RNA, 7SK small nuclear	246.063	33.8664	2.85008	0.000350123	3.45578	2.8611	6	52995621	52995948							1
ENSG00000260259	LINC02166	long intergenic non-protein coding RNA 2166	4.15676	0.73113	2.8401	0.0664886	1.17725	2.50726	16	89682620	89682842			1				0
ENSG00000240125	RPL23AP75	ribosomal protein L23a pseudogene 75	4.15676	0.73113	2.82877	0.0827242	1.08237	2.50726	17	40439467	40439917	1						0
ENSG00000259295	CSPG4P12	chondroitin sulfate proteoglycan 4 pseudogene 12	4.16491	0.73113	2.81846	0.101792	0.992288	2.51008	15	85207702	85213905	1						0
ENSG00000208012	MIRLET7F2	microRNA let-7f-2	3.87333	0.461841	2.80319	0.274293	0.561785	3.06811	0	53557192	53557274				1			0
ENSG00000199065	MIR101-2	microRNA 101-2	17.8274	2.65523	2.77137	0.324591	0.488663	2.74719	9	4850297	4850375				1			0
ENSG00000283545 /// ENSG00000283414 /// ENSG00000283575 /// ENSG00000283418	RF00026	NA	3.84891	0.461841	2.76137	0.0977551	1.00986	3.05898	1	180758722	180758817		1					0
ENSG00000243753	HLA-L	major histocompatibility complex, class I, L (pseudogene)	3.85705	0.461841	2.75729	0.0808194	1.09248	3.06203	6	30261587	30261703	1						0
ENSG00000083828	ZNF586	zinc finger protein 586	3.84891	0.73113	2.72489	0.0822855	1.08468	2.39625	19	57779348	57780544							1
ENSG00000182747	SLC35D3	solute carrier family 35 member D3	3.84891	0.73113	2.72483	0.0823682	1.08424	2.39625	6	136924697	136925639							1
ENSG00000122986	HVCN1	hydrogen voltage gated channel 1	3.5085	0.461841	2.63611	0.139469	0.855522	2.92539	12	110682655	110683264							1
ENSG00000279822	AC016397.2	NA	3.52478	0.461841	2.63506	0.11587	0.936028	2.93206	10	48443836	48445820		1					0
ENSG00000111846	GCNT2	glucosaminyl (N-acetyl) transferase 2 (I blood group)	3.52478	0.461841	2.63338	0.110127	0.958107	2.93206	6	10626608	10629368							1
ENSG00000232388 #or# ENSG00000284776	AL121900.2	small integral membrane protein 26 #or# NA	3.51664	0.73113	2.59971	0.0939224	1.02723	2.266	20	18567453	18567478		1					0
ENSG00000264940	SNORD3C	small nucleolar RNA, C/D box 3C	3.51664	0.73113	2.59126	0.108148	0.965981	2.266	17	19190029	19190245					1		0
ENSG00000188033 #or# ENSG00000269693	AC010422.6	zinc finger protein 490 #or# NA	3.53292	0.73113	2.58958	0.118065	0.927881	2.27266	19	12525720	12527916		1					0
ENSG00000187601	MAGEH1	MAGE family member H1	3.52478	0.73113	2.5892	0.115146	0.938753	2.26933	0	55453035	55453566							1
ENSG00000143450 #or# ENSG00000232937 /// ENSG00000143450	OAZ3	ornithine decarboxylase antizyme 3 #or# NA /// ornithine decarboxylase antizyme 3	7.02513	1.46226	2.58717	0.0278212	1.55562	2.26433	1	151771220	151771330							1
ENSG00000135917	SLC19A3	solute carrier family 19 member 3	3.51664	0.73113	2.58594	0.11744	0.930184	2.266	2	227701607	227702320							1
ENSG00000213590	AL807752.1	NA	3.51664	0.73113	2.58457	0.119864	0.921312	2.266	9	136935840	136937161		1					0
ENSG00000197182 #or# ENSG00000284520 /// ENSG00000197182 #or# ENSG00000241990 /// ENSG00000197182 #or# ENSG00000283990 /// ENSG00000197182	MIRLET7BHG	MIRLET7B host gene #or# PRR34 antisense RNA 1 /// MIRLET7B host gene #or# microRNA let-7b /// MIRLET7B host gene #or# microRNA let-7a-3 /// MIRLET7B host gene	6.79869	1.19297	2.55678	0.0921498	1.03551	2.5107	22	46109764	46113928				1			0
ENSG00000131400	NAPSA	napsin A aspartic peptidase	3.22506	0.461841	2.51501	0.17955	0.745814	2.80386	19	50361909	50362313		1					0
ENSG00000232389	AL583856.1	NA	3.16808	0.461841	2.51339	0.31073	0.507617	2.77814	6	70608234	70609334		1					0
ENSG00000189050 #or# ENSG00000267104	TBC1D3P1-DHX40P1	ring finger protein, transmembrane 1 #or# TBC1D3P1-DHX40P1 readthrough, transcribed pseudogene	3.20878	0.461841	2.50513	0.161903	0.790744	2.79656	17	59962363	59962616	1						0
ENSG00000151651	ADAM8	ADAM metallopeptidase domain 8	3.21692	0.461841	2.50438	0.148204	0.82914	2.80021	10	133273305	133273430							1
ENSG00000013364	MVP	major vault protein	3.1925	0.461841	2.49921	0.160239	0.795232	2.78922	16	29841596	29841790							1
ENSG00000229052	AL449283.1	NA	3.18436	0.461841	2.49448	0.150876	0.82138	2.78554	1	92931579	92932091		1					0
ENSG00000188295	ZNF669	zinc finger protein 669	3.1925	0.461841	2.49429	0.138856	0.857436	2.78922	1	247104200	247104365							1
ENSG00000165060 #or# ENSG00000285130 /// ENSG00000285130	AL358113.1	NA /// frataxin #or# NA	3.18436	0.461841	2.49112	0.135729	0.867327	2.78554	9	69216339	69216366		1					0
ENSG00000280353	AC011466.4	NA	3.1925	0.461841	2.48624	0.108013	0.966523	2.78922	19	48198107	48199720		1					0
ENSG00000197153 /// ENSG00000197153 #or# ENSG00000278677	HIST1H3J	histone cluster 1 H3 family member j #or# histone cluster 1 H2A family member m /// histone cluster 1 H3 family member j	6.36872	1.19297	2.47622	0.0634255	1.19774	2.41645	6	27890635	27890810							1
ENSG00000196189	SEMA4A	semaphorin 4A	3.1925	0.73113	2.45134	0.13214	0.878966	2.12649	1	156176405	156176656							1
ENSG00000274667	AC090517.2	NA	3.21692	0.73113	2.44949	0.148049	0.829594	2.13748	15	56729932	56730611		1					0
ENSG00000235454	HAUS6P3	HAUS augmin like complex subunit 6 pseudogene 3	3.20064	0.73113	2.43346	0.170904	0.767248	2.13016	7	53862233	53863339	1						0
ENSG00000178301	AQP11	aquaporin 11	6.10971	1.19297	2.42174	0.0375449	1.42545	2.35655	11	77609378	77610355							1
ENSG00000231443	AC124944.2	NA	2.89279	0.461841	2.35721	0.20082	0.697193	2.64699	3	195938430	195938739		1					0
ENSG00000126950	TMEM35A	transmembrane protein 35A	2.86023	0.461841	2.35188	0.242255	0.615727	2.63066	0	101094573	101094939							1
ENSG00000007350	TKTL1	transketolase like 1	2.86023	0.461841	2.35071	0.235084	0.628777	2.63066	0	154329516	154329688							1
ENSG00000260060	AC009088.1	NA	2.86837	0.461841	2.35045	0.214567	0.668437	2.63476	16	31196131	31196963		1					0
ENSG00000137501	SYTL2	synaptotagmin like 2	2.88465	0.461841	2.3495	0.180268	0.744082	2.64293	11	85757760	85758069							1
ENSG00000252947	SCARNA1	small Cajal body-specific RNA 1	2.90093	0.461841	2.3488	0.157347	0.803141	2.65105	1	27834401	27834566							1
ENSG00000143217	NECTIN4	nectin cell adhesion molecule 4	2.89279	0.461841	2.33992	0.13699	0.863312	2.64699	1	161072140	161072885							1
ENSG00000136040	PLXNC1	plexin C1	5.75302	1.19297	2.33763	0.0500476	1.30062	2.26976	12	94279472	94279986							1
ENSG00000183246	RIMBP3C	RIMS binding protein 3C	2.86023	0.461841	2.33611	0.15606	0.806708	2.63066	22	21545678	21546056							1
ENSG00000250999	AC136604.3	NA	2.87651	0.73113	2.29505	0.170191	0.769062	1.97612	5	179664323	179664430		1					0
ENSG00000249098	AC055733.1	NA	8.29725	1.65481	2.29485	0.0207932	1.68208	2.32597	3	130918226	130918703		1					0
ENSG00000271020	AC112220.2	NA	2.86837	0.73113	2.29478	0.166294	0.779125	1.97203	3	33797149	33797681		1					0
ENSG00000279689	AC022400.9	NA	2.89279	0.73113	2.28395	0.2039	0.690584	1.98426	10	73769264	73772862		1					0
ENSG00000267416	AC025048.4	NA	2.87651	0.73113	2.27858	0.204145	0.690061	1.97612	17	60088161	60088695		1					0
ENSG00000257195	HNRNPA1P50	heterogeneous nuclear ribonucleoprotein A1 pseudogene 50	2.86837	0.73113	2.25768	0.241856	0.616443	1.97203	12	92883773	92884700	1						0
ENSG00000283450	MIR486-2	microRNA 486-2	14.5616	3.11707	2.24817	0.262946	0.580134	2.22391	8	41660444	41660507				1			0
ENSG00000256943	AC148477.3	NA	2.86837	0.73113	2.22296	0.314271	0.502695	1.97203	12	132277257	132278329		1					0
ENSG00000274827	LINC01297	long intergenic non-protein coding RNA 1297	2.55237	0.461841	2.20692	0.430223	0.366307	2.46637	14	19348216	19348698			1				0
ENSG00000257894	AC027288.3	NA	2.56051	0.461841	2.20098	0.34708	0.459571	2.47097	12	79393672	79393925		1					0
ENSG00000102878	HSF4	heat shock transcription factor 4	2.58494	0.461841	2.19923	0.26646	0.574369	2.48466	16	67169728	67169941							1
ENSG00000213950	RPS10P2	ribosomal protein S10 pseudogene 2	2.56051	0.461841	2.19671	0.317839	0.497793	2.47097	20	14757563	14758056	1						0
ENSG00000261168	AL592424.1	NA	2.55237	0.461841	2.19516	0.334583	0.475496	2.46637	1	151130075	151131610		1					0
ENSG00000240401 /// ENSG00000162997 #or# ENSG00000240401	AC012358.3	NA /// prolyl-tRNA synthetase associated domain containing 1, pseudogene #or# NA	2.58494	0.461841	2.19379	0.241287	0.617466	2.48466	2	55316879	55317212		1					0
ENSG00000213147	RPL23AP60	ribosomal protein L23a pseudogene 60	2.56865	0.461841	2.19024	0.258091	0.588226	2.47555	10	133778246	133778699	1						0
ENSG00000002587	HS3ST1	heparan sulfate-glucosamine 3-sulfotransferase 1	5.46144	1.46226	2.18885	0.0852663	1.06922	1.90108	4	11400006	11400113							1
ENSG00000213358	AC092933.1	NA	2.56051	0.461841	2.18778	0.264352	0.577818	2.47097	3	196527339	196528032		1					0
ENSG00000220785	MTMR9LP	myotubularin related protein 9-like, pseudogene	2.54423	0.461841	2.18478	0.2911	0.535957	2.46176	1	32231847	32231969	1						0
ENSG00000103154	NECAB2	N-terminal EF-hand calcium binding protein 2	2.5768	0.461841	2.17865	0.194336	0.711446	2.48011	16	84002347	84002776							1
ENSG00000168283 #or# ENSG00000269897	COMMD3-BMI1	BMI1 proto-oncogene, polycomb ring finger #or# COMMD3-BMI1 readthrough	2.54423	0.461841	2.17671	0.242329	0.615595	2.46176	10	22326431	22326521							1
ENSG00000215158	AC138409.2	NA	2.56865	0.461841	2.17365	0.185991	0.730507	2.47555	5	34199797	34200921		1					0
ENSG00000269800	PLEKHA3P1	pleckstrin homology domain containing A3 pseudogene 1	2.53609	0.461841	2.16965	0.220791	0.656018	2.45714	19	41521043	41521787	1						0
ENSG00000281404	LINC01176	long intergenic non-protein coding RNA 1176	2.55237	0.461841	2.16928	0.189003	0.723532	2.46637	7	30412331	30412375			1				0
ENSG00000267655	AC125437.1	NA	4.8376	0.923681	2.16528	0.134262	0.872048	2.38882	18	79117207	79117920		1					0
ENSG00000220522	AL590002.1	NA	5.13731	1.19297	2.16266	0.109497	0.960597	2.10645	6	127416535	127416952		1					0
ENSG00000243678	NME2	NME/NM23 nucleoside diphosphate kinase 2	4.80503	0.923681	2.13867	0.110321	0.957341	2.37908	17	51171487	51171608							1
ENSG00000137440	FGFBP1	fibroblast growth factor binding protein 1	2.56051	0.73113	2.13242	0.192872	0.71473	1.80823	4	15935569	15935927							1
ENSG00000272767	JMJD1C-AS1	JMJD1C antisense RNA 1	2.53609	0.73113	2.13239	0.180681	0.743087	1.79441	10	63465229	63466563							1
ENSG00000128408	RIBC2	RIB43A domain with coiled-coils 2	4.78875	0.923681	2.1263	0.099657	1.00149	2.37418	22	45430900	45431016							1
ENSG00000111328	CDK2AP1	cyclin dependent kinase 2 associated protein 1	2.56865	0.73113	2.12141	0.222746	0.65219	1.81281	12	123267254	123267282							1
ENSG00000272008	AL139274.2	NA	2.53609	0.73113	2.11631	0.211993	0.673679	1.79441	6	87151159	87155285		1					0
ENSG00000228232	GAPDHP1	glyceraldehyde-3-phosphate dehydrogenase pseudogene 1	2.54423	0.73113	2.11128	0.227483	0.64305	1.79903	0	39787132	39788136	1						0
ENSG00000111834	RSPH4A	radial spoke head 4 homolog A	2.55237	0.73113	2.10997	0.235971	0.627142	1.80364	6	116632439	116632441							1
ENSG00000230319	AL022476.1	NA	2.54423	0.73113	2.10516	0.240285	0.619273	1.79903	22	43052055	43052366		1					0
ENSG00000260518	BMS1P8	BMS1, ribosome biogenesis factor pseudogene 8	2.54423	0.73113	2.09578	0.25999	0.585043	1.79903	16	33694696	33695115	1						0
ENSG00000202058	RN7SKP80	RNA, 7SK small nuclear pseudogene 80	54.9401	12.5464	2.0923	0.0527353	1.2779	2.13058	22	42565048	42565330	1						0
ENSG00000241088	RPL17P44	ribosomal protein L17 pseudogene 44	2.56865	0.73113	2.07206	0.330862	0.480353	1.81281	18	62415678	62416227	1						0
ENSG00000182902	SLC25A18	solute carrier family 25 member 18	4.50532	0.923681	2.07152	0.166484	0.778629	2.28616	22	17569924	17570393							1
ENSG00000280107	AL022393.1	NA	4.81317	1.19297	2.07048	0.117954	0.928287	2.01243	6	28170845	28172521		1					0
ENSG00000121570	DPPA4	developmental pluripotency associated 4	2.54423	0.73113	2.0687	0.316897	0.499081	1.79903	3	109333396	109333993							1
ENSG00000213126	AC092642.1	NA	5.09661	1.46226	2.06386	0.129422	0.887992	1.80134	2	179814251	179814675		1					0
ENSG00000272562	AL512343.2	NA	2.5768	0.73113	2.05944	0.364981	0.437729	1.81738	1	226060712	226061081		1					0
ENSG00000277715	AC079174.2	NA	2.53609	0.73113	2.05713	0.334036	0.476207	1.79441	12	106250759	106252786		1					0
ENSG00000185519	FAM131C	family with sequence similarity 131 member C	4.5216	0.923681	2.05021	0.131501	0.88107	2.29137	1	16058279	16058717							1
ENSG00000163359	COL6A3	collagen type VI alpha 3 chain	4.50532	0.923681	2.03951	0.123213	0.909343	2.28616	2	237386454	237386583							1
ENSG00000225558	UBE2D3P2	ubiquitin conjugating enzyme E2 D3 pseudogene 2	2.53609	0.73113	2.03308	0.383409	0.416337	1.79441	3	37134658	37135102	1						0
ENSG00000213080	AL354714.2	NA	2.53609	0.73113	2.03091	0.387825	0.411365	1.79441	1	160894980	160896076		1					0
ENSG00000138623	SEMA7A	semaphorin 7A (John Milton Hagen blood group)	4.50532	0.923681	2.03004	0.112007	0.950756	2.28616	15	74410968	74411356							1
ENSG00000234193	AC013476.1	NA	2.25266	0.461841	2.01444	0.387274	0.411982	2.28616	2	222917387	222917789		1					0
ENSG00000203711	C6orf99	chromosome 6 open reading frame 99	8.95366	2.11665	2.00911	0.0467138	1.33055	2.08069	6	158909967	158910236							1
ENSG00000157653	C9orf43	chromosome 9 open reading frame 43	2.25266	0.461841	2.00882	0.352408	0.452954	2.28616	9	113429387	113429684							1
ENSG00000244459	AC147067.1	NA	2.25266	0.461841	2.005	0.330777	0.480465	2.28616	4	1574062	1574544		1					0
ENSG00000269883	AC007375.3	NA	2.25266	0.461841	2.00455	0.328343	0.483672	2.28616	14	77140683	77142996		1					0
ENSG00000114854	TNNC1	troponin C1, slow skeletal and cardiac type	2.25266	0.461841	2.00226	0.316254	0.499964	2.28616	3	52451439	52451527							1
ENSG00000262319	AC007952.6	NA	0.648269	2.65523	-2.00059	0.405191	0.392341	-2.03417	17	19141017	19143689		1					0
ENSG00000259803	SLC22A31	solute carrier family 22 member 31	0.964263	3.77146	-2.00139	0.14883	0.827308	-1.96763	16	89199412	89199655							1
ENSG00000222019	URAHP	urate (hydroxyiso-) hydrolase, pseudogene	0.964263	3.77146	-2.00384	0.136286	0.865549	-1.96763	16	90043914	90043989	1						0
ENSG00000273181	AC131235.4	NA	0.964263	4.11749	-2.01597	0.193489	0.713343	-2.09427	3	184132942	184133561		1					0
ENSG00000036448	MYOM2	myomesin 2	3.84891	15.9705	-2.0282	0.00287976	2.54064	-2.05288	8	2144664	2144766							1
ENSG00000100985	MMP9	matrix metallopeptidase 9	0.640128	2.57849	-2.04469	0.327498	0.484791	-2.01009	20	46016369	46016561							1
ENSG00000204860	FAM201A	family with sequence similarity 201 member A	1.28026	4.8877	-2.04609	0.0606559	1.21713	-1.93272	9	38621832	38624990							1
ENSG00000128254	C22orf24	chromosome 22 open reading frame 24	0.648269	2.57849	-2.05739	0.227859	0.642333	-1.99186	22	31934348	31934449							1
ENSG00000149575	SCN2B	sodium voltage-gated channel beta subunit 2	1.2884	5.50301	-2.05924	0.0946312	1.02397	-2.09464	11	118161951	118166886							1
ENSG00000245281	AC124242.1	NA	0.956122	4.04075	-2.06294	0.119537	0.922498	-2.07936	8	18088000	18088041		1					0
ENSG00000260992	DOCK9-DT	DOCK9 divergent transcript	0.956122	4.04075	-2.06417	0.131937	0.879634	-2.07936	13	99087819	99088625							1
ENSG00000275056	AC020663.3	NA	0.640128	2.57849	-2.06752	0.2167	0.664141	-2.01009	16	4839244	4840334		1					0
ENSG00000120049	KCNIP2	potassium voltage-gated channel interacting protein 2	0.640128	2.92452	-2.07719	0.252013	0.598576	-2.19177	10	101828267	101828459							1
ENSG00000273514	FOXD4L6	forkhead box D4 like 6	0.631988	2.57849	-2.0872	0.171729	0.765157	-2.02856	9	41126430	41127129							1
ENSG00000236862	RPS20P24	ribosomal protein S20 pseudogene 24	0.631988	2.57849	-2.09154	0.159656	0.796814	-2.02856	9	72655832	72656192	1						0
ENSG00000124257	NEURL2	neuralized E3 ubiquitin protein ligase 2	1.28026	5.7723	-2.09428	0.0655791	1.18323	-2.17271	20	45888634	45888757							1
ENSG00000272933	AL391121.1	NA	1.58811	6.88854	-2.10492	0.0726368	1.13884	-2.11689	10	102642792	102644140		1					0
ENSG00000176406	RIMS2	regulating synaptic membrane exocytosis 2	0.947982	4.31004	-2.10495	0.0824597	1.08376	-2.18477	8	104223364	104223651							1
ENSG00000259275	AC087477.2	NA	1.2884	5.08025	-2.10814	0.0775698	1.11031	-1.97932	15	96390284	96395016		1					0
ENSG00000104808	DHDH	dihydrodiol dehydrogenase	1.28026	5.08025	-2.11336	0.0753279	1.12304	-1.98847	19	48944824	48944968							1
ENSG00000275601	AC011330.2	NA	0.964263	4.31004	-2.11454	0.115956	0.935706	-2.1602	15	43642389	43643023		1					0
ENSG00000262003	AC087392.1	NA	0.964263	4.31004	-2.11503	0.117302	0.930696	-2.1602	17	910694	911212		1					0
ENSG00000225400	RAB28P5	RAB28, member RAS oncogene family pseudogene 5	1.92039	8.27406	-2.12452	0.0208856	1.68015	-2.1072	0	136847384	136848034	1						0
ENSG00000099958	DERL3	derlin 3	23.7255	104.674	-2.13029	9.9105e-13	12.0039	-2.1414	22	23836767	23837154							1
ENSG00000245573	BDNF-AS	BDNF antisense RNA	0.964263	3.96401	-2.14062	0.0901374	1.0451	-2.03946	11	27676982	27677807							1
ENSG00000272501	AL662844.4	NA	0.640128	2.84778	-2.14926	0.163331	0.786932	-2.15341	6	31195200	31198037		1					0
ENSG00000182329	KIAA2012	KIAA2012	0.640128	2.84778	-2.15025	0.20913	0.679585	-2.15341	2	202196800	202197862							1
ENSG00000198242 #or# ENSG00000238597	SNORD4B	ribosomal protein L23a #or# small nucleolar RNA, C/D box 4B	0.640128	2.84778	-2.15078	0.24288	0.614608	-2.15341	17	28723682	28723753					1		0
ENSG00000215278	RPS7P6	ribosomal protein S7 pseudogene 6	0.640128	2.84778	-2.15117	0.274503	0.561453	-2.15341	4	17427696	17428274	1						0
ENSG00000273189	AC010619.2	NA	1.27212	5.69556	-2.1522	0.0500145	1.3009	-2.16261	19	49487017	49487637		1					0
ENSG00000236499	LINC00896	long intergenic non-protein coding RNA 896	1.61253	7.08109	-2.16277	0.0432145	1.36437	-2.13464	22	20206577	20207183			1				0
ENSG00000259826	AC072061.1	NA	0.972404	4.2333	-2.1659	0.134604	0.870942	-2.12216	7	39947522	39949755		1					0
ENSG00000240065	PSMB9	proteasome subunit beta 9	0.964263	4.57933	-2.17355	0.111616	0.952275	-2.24764	6	32858364	32858722							1
ENSG00000269993	KC877982.1	NA	10.5336	47.797	-2.19276	3.8578e-09	8.41366	-2.18192	0	151182386	151182855		1					0
ENSG00000135318	NT5E	5'-nucleotidase ecto	0.648269	3.11707	-2.22242	0.172823	0.762398	-2.26553	6	85491127	85491325							1
ENSG00000109321	AREG	amphiregulin	0.640128	3.11707	-2.22982	0.173615	0.760412	-2.28376	4	74450380	74450532							1
ENSG00000125384	PTGER2	prostaglandin E receptor 2	0.956122	4.50259	-2.23556	0.0630631	1.20022	-2.23549	14	52327455	52328606							1
ENSG00000234694	AL139289.2	NA	0.956122	4.50259	-2.23558	0.0619127	1.20822	-2.23549	1	43354684	43355006		1					0
ENSG00000130656	HBZ	hemoglobin subunit zeta	0.640128	3.11707	-2.24208	0.214628	0.668313	-2.28376	16	154401	154503							1
ENSG00000006747	SCIN	scinderin	0.956122	4.84862	-2.24622	0.113994	0.943117	-2.34231	7	12625762	12626541							1
ENSG00000233547	AL158212.2	NA	0.631988	3.11707	-2.25665	0.236363	0.626421	-2.30222	10	112950646	112951007		1					0
ENSG00000233967	AL359715.1	NA	0.631988	3.11707	-2.25833	0.243565	0.613385	-2.30222	6	80462872	80463207		1					0
ENSG00000250327	RPSAP70	ribosomal protein SA pseudogene 70	0.631988	2.77104	-2.26305	0.142824	0.845198	-2.13246	4	186158650	186158843	1						0
ENSG00000142632	ARHGEF19	Rho guanine nucleotide exchange factor 19	0.956122	4.77188	-2.27372	0.0538707	1.26865	-2.31929	1	16205849	16205926							1
ENSG00000232021	LEF1-AS1	LEF1 antisense RNA 1	0.648269	3.04033	-2.30375	0.160642	0.794142	-2.22956	4	108256645	108256836							1
ENSG00000122877	EGR2	early growth response 2	0.631988	3.04033	-2.30977	0.18776	0.726397	-2.26626	10	62814433	62814468							1
ENSG00000279799	AC006077.2	NA	2.55237	12.5074	-2.31415	0.0036972	2.43213	-2.29287	5	134905235	134905691		1					0
ENSG00000270933	AC010719.1	NA	2.54423	12.5074	-2.31676	0.00308806	2.51031	-2.29748	7	25948657	25949403		1					0
ENSG00000251568	ALG3P1	ALG3, alpha-1,3- mannosyltransferase pseudogene 1	0.640128	3.04033	-2.31733	0.142295	0.84681	-2.2478	5	5375723	5376836	1						0
ENSG00000224800	RPS27AP6	ribosomal protein S27a pseudogene 6	0.964263	5.04117	-2.31812	0.0583587	1.23389	-2.38626	1	150881236	150881683	1						0
ENSG00000272516	AL158211.4	NA	0.631988	3.04033	-2.31877	0.155535	0.808171	-2.26626	10	22332404	22332987		1					0
ENSG00000207605	MIR191	microRNA 191	0.640128	3.38636	-2.35766	0.273753	0.562641	-2.4033	3	49020618	49020709				1			0
ENSG00000275263	AC135048.3	NA	1.61253	8.62009	-2.367	0.0106645	1.97206	-2.41837	16	30956872	30957199		1					0
ENSG00000108018	SORCS1	sortilin related VPS10 domain containing receptor 1	0.964263	4.96443	-2.38296	0.0679679	1.1677	-2.36413	10	106667084	106667308							1
ENSG00000273366	Z83851.2	NA	0.648269	3.30962	-2.38325	0.108754	0.963555	-2.352	22	42278188	42278846		1					0
ENSG00000159307	SCUBE1	signal peptide, CUB domain and EGF like domain containing 1	0.648269	3.30962	-2.38449	0.10261	0.988812	-2.352	22	43316958	43317110							1
ENSG00000227398	KIF9-AS1	KIF9 antisense RNA 1	0.640128	3.30962	-2.38998	0.0977837	1.00973	-2.37023	3	47242979	47246601							1
ENSG00000101115	SALL4	spalt like transcription factor 4	0.640128	3.23288	-2.42553	0.177492	0.750821	-2.33639	20	51792068	51792352							1
ENSG00000063127	SLC6A16	solute carrier family 6 member 16	0.648269	3.57891	-2.4318	0.0676861	1.1695	-2.46486	19	49306085	49306087							1
ENSG00000279355	AGPAT4-IT1	AGPAT4 intronic transcript 1	0.947982	5.23372	-2.43812	0.0605342	1.218	-2.46491	6	161160105	161161982							1
ENSG00000227953	LINC01341	long intergenic non-protein coding RNA 1341	0.648269	3.57891	-2.44987	0.133373	0.874931	-2.46486	1	246792057	246792385			1				0
ENSG00000279407	AC007191.1	NA	0.631988	3.57891	-2.45802	0.11079	0.9555	-2.50155	19	45714387	45717381		1					0
ENSG00000176933	TOB2P1	transducer of ERBB2, 2 pseudogene 1	0.964263	5.15699	-2.46972	0.0682573	1.16585	-2.41903	6	28217643	28218634	1						0
ENSG00000175197	DDIT3	DNA damage inducible transcript 3	36.7219	205.349	-2.48186	8.84957e-29	28.0531	-2.48336	12	57517476	57517542							1
ENSG00000166446	CDYL2	chromodomain Y like 2	0.956122	5.42627	-2.51922	0.077798	1.10903	-2.50469	16	80684604	80685129							1
ENSG00000166816	LDHD	lactate dehydrogenase D	0.640128	3.8482	-2.52054	0.106269	0.973592	-2.58775	16	75114526	75114685							1
ENSG00000223692	DIP2A-IT1	DIP2A intronic transcript 1	0.640128	3.8482	-2.53599	0.137993	0.860143	-2.58775	21	46469146	46469306							1
ENSG00000120055	C10orf95	chromosome 10 open reading frame 95	0.640128	3.77146	-2.58115	0.124217	0.905819	-2.55869	10	102449837	102450451							1
ENSG00000267332	BOLA3P2	bolA family member 3 pseudogene 2	0.631988	4.11749	-2.64622	0.184492	0.734022	-2.7038	19	9019787	9019984	1						0
ENSG00000281357	ARRDC3-AS1	ARRDC3 antisense RNA 1	0.631988	4.04075	-2.65501	0.0926089	1.03335	-2.67666	5	91422778	91422963							1
ENSG00000257543	AC063948.1	NA	0.956122	5.88812	-2.65841	0.0204544	1.68921	-2.62254	12	101408372	101408531		1					0
ENSG00000130822	PNCK	pregnancy up-regulated nonubiquitous CaM kinase	0.315994	2.19339	-2.70488	0.297553	0.526436	-2.79519	0	153686625	153686683							1
ENSG00000261764	KRT18P18	keratin 18 pseudogene 18	0.324135	2.19339	-2.71175	0.345235	0.461885	-2.7585	16	72728616	72729894	1						0
ENSG00000279204 /// ENSG00000245812 #or# ENSG00000279204	AC134043.2	NA /// long intergenic non-protein coding RNA 2202 #or# NA	0.315994	2.19339	-2.72411	0.346068	0.460839	-2.79519	5	159106380	159108617		1					0
ENSG00000273464	AP000238.1	NA	0.324135	2.11665	-2.7327	0.364736	0.438022	-2.70712	21	29657406	29657831		1					0
ENSG00000235555	SUMO1P4	SUMO1 pseudogene 4	0.315994	2.11665	-2.74536	0.357426	0.446814	-2.74382	19	49275119	49275420	1						0
ENSG00000176697	BDNF	brain derived neurotrophic factor	0.315994	2.19339	-2.75005	0.454758	0.34222	-2.79519	11	27654893	27657820							1
ENSG00000172404	DNAJB7	DnaJ heat shock protein family (Hsp40) member B7	0.315994	2.11665	-2.75157	0.284563	0.545821	-2.74382	22	40859549	40861064							1
ENSG00000214455	RCN1P2	reticulocalbin 1 pseudogene 2	0.315994	2.11665	-2.75224	0.278395	0.555338	-2.74382	13	45390353	45391267	1						0
ENSG00000270604 /// ENSG00000231074 #or# ENSG00000270604	HCG17	HLA complex group 18 (non-protein coding) #or# HLA complex group 17 (non-protein coding) /// HLA complex group 17 (non-protein coding)	0.324135	2.11665	-2.75469	0.214374	0.668829	-2.70712	6	30234039	30234268							1
ENSG00000164845	FAM86FP	family with sequence similarity 86 member F, pseudogene	0.315994	2.11665	-2.75652	0.244116	0.612404	-2.74382	12	8234342	8234425	1						0
ENSG00000278993	AC002350.1	NA	0.315994	2.11665	-2.75699	0.240815	0.618316	-2.74382	12	110501614	110503441		1					0
ENSG00000118514	ALDH8A1	aldehyde dehydrogenase 8 family member A1	0.315994	2.11665	-2.75818	0.232833	0.632956	-2.74382	6	134942539	134942564							1
ENSG00000221184	MIR1254-1	microRNA 1254-1	0.315994	2.11665	-2.76067	0.21763	0.66228	-2.74382	10	68759318	68759414				1			0
ENSG00000101282	RSPO4	R-spondin 4	0.315994	2.19339	-2.76228	0.541808	0.266155	-2.79519	20	960254	960356							1
ENSG00000248587	GDNF-AS1	GDNF antisense RNA 1	0.315994	2.11665	-2.76254	0.20743	0.683129	-2.74382	5	37874701	37875799							1
ENSG00000264186	SNRPCP4	small nuclear ribonucleoprotein polypeptide C pseudogene 4	0.315994	2.11665	-2.76262	0.207003	0.684023	-2.74382	18	2990652	2991078	1						0
ENSG00000271387	AL445228.2	NA	0.324135	2.11665	-2.76343	0.180014	0.744693	-2.70712	1	184385753	184386704		1					0
ENSG00000232654	FAM136BP	family with sequence similarity 136 member B, pseudogene	0.964263	6.96527	-2.76835	0.0103555	1.98483	-2.85268	6	3045384	3045800	1						0
ENSG00000200211	RNY4P27	RNA, Ro-associated Y4 pseudogene 27	0.315994	2.19339	-2.76861	0.605861	0.217627	-2.79519	13	95336106	95336201	1						0
ENSG00000204052	LRRC73	leucine rich repeat containing 73	0.640128	4.57933	-2.77217	0.0762399	1.11782	-2.8387	6	43506969	43507237							1
ENSG00000180914	OXTR	oxytocin receptor	0.315994	2.11665	-2.77534	0.156103	0.806589	-2.74382	3	8768443	8768591							1
ENSG00000278840	AC009878.1	NA	0.315994	2.11665	-2.77579	0.154712	0.810475	-2.74382	15	26557598	26557937		1					0
ENSG00000242248	RPL7AP57	ribosomal protein L7a pseudogene 57	0.315994	2.11665	-2.7786	0.146669	0.833661	-2.74382	11	92161106	92161889	1						0
ENSG00000223875	NBEAP3	neurobeachin pseudogene 3	0.315994	2.11665	-2.78829	0.124101	0.906226	-2.74382	22	15893137	15893942	1						0
ENSG00000215217	C5orf49	chromosome 5 open reading frame 49	0.324135	2.38594	-2.86124	0.142542	0.846058	-2.87989	5	7831398	7831849							1
ENSG00000269892	AC125494.2	NA	0.324135	2.38594	-2.86646	0.165357	0.781579	-2.87989	12	6742985	6743641		1					0
ENSG00000272354	AC092354.1	NA	0.315994	2.38594	-2.86646	0.145254	0.837873	-2.91659	5	65020614	65020989		1					0
ENSG00000149573	MPZL2	myelin protein zero like 2	0.648269	4.77188	-2.86685	0.0594251	1.22603	-2.87989	11	118262720	118262850							1
ENSG00000270076	AF131215.7	NA	0.324135	2.38594	-2.86723	0.169545	0.770715	-2.87989	8	11202965	11203671		1					0
ENSG00000278963	AC005921.3	NA	0.315994	2.38594	-2.86895	0.153622	0.813548	-2.91659	17	50722074	50724224		1					0
ENSG00000228412	AL022068.1	NA	0.315994	2.38594	-2.87394	0.173923	0.759644	-2.91659	6	19803716	19803910		1					0
ENSG00000255107	AC079089.2	NA	0.324135	2.38594	-2.87405	0.222923	0.651846	-2.87989	8	69859264	69860540		1					0
ENSG00000125337	KIF25	kinesin family member 25	0.631988	4.77188	-2.87467	0.0493603	1.30662	-2.91659	6	168035752	168036147							1
ENSG00000234779	BNC2-AS1	BNC2 antisense RNA 1	0.315994	2.38594	-2.87524	0.180116	0.744447	-2.91659	9	16727315	16727524							1
ENSG00000264204	AGAP7P	ArfGAP with GTPase domain, ankyrin repeat and PH domain 7, pseudogene	0.315994	2.38594	-2.87675	0.188021	0.725794	-2.91659	10	46129883	46131358	1						0
ENSG00000166924	NYAP1	neuronal tyrosine phosphorylated phosphoinositide-3-kinase adaptor 1	0.315994	2.38594	-2.87719	0.190432	0.72026	-2.91659	7	100493646	100494086							1
ENSG00000049768	FOXP3	forkhead box P3	0.315994	2.38594	-2.87944	0.203826	0.690741	-2.91659	0	49251334	49251336							1
ENSG00000273137	AL022328.2	NA	0.315994	2.38594	-2.88557	0.251996	0.598606	-2.91659	22	50208461	50208769		1					0
ENSG00000081665	ZNF506	zinc finger protein 506	0.315994	2.65523	-2.92942	0.110013	0.958554	-3.07087	19	19820255	19820666							1
ENSG00000130755	GMFG	glia maturation factor gamma	0.324135	2.65523	-2.93781	0.117734	0.929098	-3.03417	19	39332904	39333126							1
ENSG00000245522	AC026250.1	NA	0.324135	2.65523	-2.94422	0.122703	0.911144	-3.03417	11	9755129	9756898		1					0
ENSG00000263080	AC009121.2	NA	0.640128	4.96443	-2.97553	0.0228284	1.64152	-2.9552	16	11344351	11344770		1					0
ENSG00000279491	AP003733.4	NA	0.324135	2.65523	-2.99166	0.194312	0.7115	-3.03417	11	61967794	61969490		1					0
ENSG00000184731	FAM110C	family with sequence similarity 110 member C	0.315994	2.65523	-3.03385	0.346291	0.460559	-3.07087	2	41221	41627							1
ENSG00000161040	FBXL13	F-box and leucine rich repeat protein 13	0.324135	2.57849	-3.04029	0.189086	0.72334	-2.99186	7	103074771	103074811							1
ENSG00000229728	AL136531.1	NA	0.315994	2.57849	-3.07014	0.115344	0.938004	-3.02856	20	1362397	1362585		1					0
ENSG00000113763	UNC5A	unc-5 netrin receptor A	0.324135	2.57849	-3.07835	0.0951668	1.02151	-2.99186	5	176874264	176874400							1
ENSG00000178726	THBD	thrombomodulin	0.631988	5.57975	-3.08142	0.0894433	1.04845	-3.14223	20	23045633	23047776							1
ENSG00000270030	AC136475.7	NA	0.315994	2.92452	-3.12566	0.19784	0.703686	-3.21023	11	325703	326294		1					0
ENSG00000234917	AC098484.2	NA	0.324135	2.84778	-3.14749	0.119122	0.924008	-3.13517	1	42681194	42681659		1					0
ENSG00000272843	AC211476.2	NA	0.315994	2.84778	-3.15099	0.0908282	1.04178	-3.17187	7	72924418	72925125		1					0
ENSG00000152292	SH2D6	SH2 domain containing 6	0.315994	2.84778	-3.15599	0.240098	0.619612	-3.17187	2	85436466	85436738							1
ENSG00000267291	AC008649.1	NA	0.631988	5.96485	-3.19812	0.0236149	1.62681	-3.23852	19	38601413	38601694		1					0
ENSG00000069535	MAOB	monoamine oxidase B	0.324135	3.11707	-3.23369	0.105489	0.976793	-3.26553	0	43843800	43843934							1
ENSG00000260886	TAT-AS1	TAT antisense RNA 1	0.324135	3.11707	-3.24279	0.130139	0.885591	-3.26553	16	71578065	71578187							1
ENSG00000277369	AC010654.1	NA	0.315994	3.11707	-3.25336	0.142995	0.844679	-3.30222	16	11797468	11798275		1					0
ENSG00000235872	AC078777.1	NA	0.315994	3.11707	-3.25592	0.152614	0.816406	-3.30222	12	67658991	67659584		1					0
ENSG00000258552	AC007375.1	NA	0.315994	3.38636	-3.30314	0.0799803	1.09702	-3.42177	14	77173075	77173652		1					0
ENSG00000179284	DAND5	DAN domain BMP antagonist family member 5	0.315994	3.04033	-3.30735	0.0956883	1.01914	-3.26626	19	12973635	12974762							1
ENSG00000279879	AC091152.4	NA	0.324135	3.30962	-3.37539	0.123072	0.909839	-3.352	17	44689858	44693340		1					0
ENSG00000242338	BMS1P4	BMS1, ribosome biogenesis factor pseudogene 4	0.324135	3.8482	-3.53638	0.0807931	1.09263	-3.56952	10	73717115	73717192	1						0
ENSG00000162631	NTNG1	netrin G1	0.315994	3.8482	-3.5366	0.0730054	1.13664	-3.60622	1	107333949	107334023							1
ENSG00000251050	AC112184.1	NA	0.324135	3.77146	-3.57809	0.068996	1.16118	-3.54046	5	80019609	80019920		1					0
ENSG00000224842	AL161908.1	NA	0.324135	3.77146	-3.58109	0.0605195	1.2181	-3.54046	9	126608278	126608461		1					0
ENSG00000204044	SLC12A5-AS1	SLC12A5 and MMP9 antisense RNA 1	0.315994	4.31004	-3.69088	0.0307896	1.5116	-3.76973	20	46020619	46020905							1
ENSG00000229852	AC019205.1	NA	0.315994	4.96443	-3.97486	0.0178681	1.74792	-3.97366	6	73290533	73291340		1					0
ENSG00000157103	SLC6A1	solute carrier family 6 member 1	0	2.19339	-4.15601	0.1338	0.873544	?	3	11036862	11039169							1
ENSG00000149654	CDH22	cadherin 22	0	2.11665	-4.1784	0.244374	0.611945	?	20	46209821	46210560							1
ENSG00000165591	FAAH2	fatty acid amide hydrolase 2	0	2.11665	-4.1899	0.108272	0.965483	?	0	57452131	57452166							1
ENSG00000011465	DCN	decorin	0	2.11665	-4.19055	0.104111	0.982504	?	12	91179199	91179732							1
ENSG00000212027	MIR374B	microRNA 374b	0	2.19339	-4.1921	0.284486	0.545939	?	0	74218547	74218618				1			0
ENSG00000232656	IDI2-AS1	IDI2 antisense RNA 1	0	2.11665	-4.19591	0.0770404	1.11328	?	10	1043761	1044024							1
ENSG00000269420	PLA2G4C-AS1	PLA2G4C antisense RNA 1	0	2.19339	-4.19839	0.339946	0.46859	?	19	48061913	48062222							1
ENSG00000165076	PRSS37	serine protease 37	0	2.19339	-4.20795	0.469657	0.32822	?	7	141836359	141836535							1
ENSG00000199094	MIR30C2	microRNA 30c-2	0	2.19339	-4.20795	0.469657	0.32822	?	6	71376960	71377031				1			0
ENSG00000261488	AC128688.2	NA	0	2.11665	-4.20854	0.0424775	1.37184	?	3	112133423	112135359		1					0
ENSG00000183186	C2CD4C	C2 calcium dependent domain containing 4C	0	2.11665	-4.21209	0.0367529	1.43471	?	19	405438	407095							1
ENSG00000129910	CDH15	cadherin 15	0.324135	6.23414	-4.2498	0.0248785	1.60418	-4.26553	16	89195156	89195492							1
ENSG00000240207	AC080013.1	NA	0	2.38594	-4.30782	0.0297451	1.52658	?	3	158742781	158743336		1					0
ENSG00000068976	PYGM	glycogen phosphorylase, muscle associated	0	2.38594	-4.32047	0.0621743	1.20639	?	11	64753671	64753682							1
ENSG00000163885	CFAP100	cilia and flagella associated protein 100	0	2.38594	-4.32561	0.09286	1.03217	?	3	126436291	126436556							1
ENSG00000218682	AC064847.1	NA	0	2.38594	-4.32747	0.10967	0.959912	?	2	25856461	25856966		1					0
ENSG00000262692	AC116914.2	NA	0	2.38594	-4.32789	0.114135	0.942582	?	17	3722389	3722488		1					0
ENSG00000224888	AC138028.2	NA	0	2.38594	-4.3284	0.119753	0.921715	?	16	88738504	88741425		1					0
ENSG00000232803	SLCO4A1-AS1	SLCO4A1 antisense RNA 1	0	2.3092	-4.33195	0.178446	0.748494	?	20	62663031	62663487							1
ENSG00000279115	AC006386.2	NA	0	2.38594	-4.33713	0.355115	0.44963	?	0	25307729	25307803		1					0
ENSG00000272892	AL133551.1	NA	0	2.65523	-4.39804	0.0246322	1.6085	?	10	67849525	67850746		1					0
ENSG00000274536 #or# ENSG00000284567	AL034397.3	NA #or# microRNA 223	0.324135	7.04201	-4.41934	0.0426445	1.37014	-4.44132	0	66018824	66020422		1					0
ENSG00000163993	S100P	S100 calcium binding protein P	0	2.65523	-4.43218	0.0463623	1.33383	?	4	6696893	6697170							1
ENSG00000150628	SPATA4	spermatogenesis associated 4	0	2.65523	-4.44474	0.0635455	1.19691	?	4	176192972	176193076							1
ENSG00000224215	AL606469.1	NA	0	2.65523	-4.44491	0.0638457	1.19487	?	10	23344424	23345181		1					0
ENSG00000214961	FO393409.1	NA	0	2.65523	-4.45608	0.0894253	1.04854	?	0	134272287	134273658		1					0
ENSG00000121410	A1BG	alpha-1-B glycoprotein	0	2.65523	-4.45615	0.0896473	1.04746	?	19	58350594	58350651							1
ENSG00000272183	AC005041.3	NA	0	2.57849	-4.47445	0.108259	0.965538	?	2	74501717	74502365		1					0
ENSG00000270061	AC068790.5	NA	0	2.84778	-4.59326	0.0257241	1.58966	?	12	123969990	123970344		1					0
ENSG00000156968	MPV17L	MPV17 mitochondrial inner membrane protein like	0	2.84778	-4.59581	0.34214	0.465796	?	16	15407933	15408118							1
ENSG00000282851 /// ENSG00000141971 #or# ENSG00000282851	BISPR	multivesicular body subunit 12A #or# BST2 interferon stimulated positive regulator (non-protein coding) /// BST2 interferon stimulated positive regulator (non-protein coding)	0	3.11707	-4.70122	0.0540064	1.26755	?	19	17414136	17414347							1
ENSG00000227071	FOCAD-AS1	FOCAD antisense RNA 1	0	3.04033	-4.74863	0.0164864	1.78287	?	9	20683389	20683541							1
ENSG00000153902	LGI4	leucine rich repeat LGI family member 4	0	3.57891	-4.89824	0.0100362	1.99843	?	19	35131532	35131555							1
ENSG00000261766	AC133550.2	NA	0	3.8482	-5.01107	0.0668499	1.1749	?	16	28862166	28862530		1					0
