# Supplementary material for: MLL-AF4 and a murinized pSer-variant thereof are turning on the nucleolar stress pathway
Source: Cell Biosci. 2022 Apr 25;12:47. doi: 10.1186/s13578-022-00781-y (PMC9036721; doi:10.1186/s13578-022-00781-y)
Supplement: Supplementary file 3 — Additional file 3: A4M gene signature. [file 13578_2022_781_MOESM3_ESM.xlsx]

## Sheet: Sheet1
ID	gene symbol	gene name	mean exp	mean Mock	log2	pvalue	minus log 10	log2 rolf	chrom	Anfang	Ende	PG	NA	LINC	MIR	SNO	MT	ProCodG
ENSG00000162390	ACOT11	acyl-CoA thioesterase 11	5.48059	0	4.68553	0.00514065	2.28898	?	1	54599296	54599658							1
ENSG00000274997	HIST1H2AH	histone cluster 1 H2A family member h	4.28097	0	4.33688	0.0071413	2.14622	?	6	27147513	27147515							1
ENSG00000228150	AL357140.2	NA	4.0002	0	4.21654	0.0110975	1.95478	?	1	9949638	9949974		1					0
ENSG00000235546	AC087499.4	NA	3.95223	0	4.20839	0.0152437	1.81691	?	17	20612667	20614008		1					0
ENSG00000229182	MRPS16P1	mitochondrial ribosomal protein S16 pseudogene 1	3.94871	0	4.20757	0.0194103	1.71197	?	8	91917507	91917918	1						0
ENSG00000162105	SHANK2	SH3 and multiple ankyrin repeat domains 2	3.90383	0	4.1947	0.0385002	1.41454	?	11	71174693	71174844							1
ENSG00000229419	RALGAPA1P1	Ral GTPase activating protein catalytic alpha subunit 1 pseudogene 1	3.59226	0	4.06535	0.0253714	1.59566	?	9	105520128	105526359	1						0
ENSG00000273063	AC007250.1	NA	3.57862	0	4.06064	0.0166913	1.77751	?	2	58241349	58241686		1					0
ENSG00000272650	AC110792.3	NA	3.56145	0	4.05779	0.0441386	1.35518	?	4	53997415	53997712		1					0
ENSG00000254676	AP000873.4	NA	3.54781	0	4.05426	0.0212974	1.67167	?	11	83184082	83184520		1					0
ENSG00000266173	STRADA	STE20-related kinase adaptor alpha	3.18432	0	3.89356	0.0462429	1.33495	?	17	63725704	63728413							1
ENSG00000100276	RASL10A	RAS like family 10 member A	3.14999	0	3.88334	0.030921	1.50975	?	22	29313535	29313987							1
ENSG00000105877	DNAH11	dynein axonemal heavy chain 11	3.12579	0	3.87804	0.0257704	1.58888	?	7	21901007	21901116							1
ENSG00000280353	AC011466.4	NA	7.89743	0.461841	3.79145	0.0112156	1.95018	4.09592	19	48198107	48199720		1					0
ENSG00000238198	AL357055.3	NA	2.8041	0	3.70579	0.0496114	1.30442	?	1	113011687	113013839		1					0
ENSG00000271926	AC008972.1	NA	2.78694	0	3.70201	0.0925878	1.03345	?	5	72953635	72954274		1					0
ENSG00000230555	AL450326.1	NA	2.78342	0	3.6994	0.054011	1.26752	?	10	43421670	43422100		1					0
ENSG00000082196	C1QTNF3	C1q and TNF related 3	2.7799	0	3.69873	0.0700968	1.1543	?	5	34033065	34033458							1
ENSG00000179978	AC140134.1	NA	2.7799	0	3.69798	0.0485164	1.31411	?	5	70094659	70095023		1					0
ENSG00000263155	MYZAP	myocardial zonula adherens protein	2.77638	0	3.69679	0.0469025	1.3288	?	15	57684423	57684791							1
ENSG00000250329	KDELC1P1	KDEL motif containing 1 pseudogene 1	2.77638	0	3.69644	0.0391532	1.40723	?	5	128109486	128110994	1						0
ENSG00000260014	LSM3P5	LSM3 homolog, U6 small nuclear RNA and mRNA degradation associated pseudogene 5	2.77638	0	3.69583	0.0303793	1.51742	?	16	78355529	78355834	1						0
ENSG00000251544	MTND5P12	mitochondrially encoded NADH:ubiquinone oxidoreductase core subunit 5 pseudogene 12	2.76626	0	3.69374	0.053688	1.27012	?	5	94567461	94568909	1						0
ENSG00000254481	PTP4A2P2	protein tyrosine phosphatase type IVA, member 2 pseudogene 2	2.73853	0	3.68614	0.0393559	1.40499	?	11	134123828	134124329	1						0
ENSG00000249858	SNX5P1	sorting nexin 5 pseudogene 1	2.72489	0	3.68154	0.0445189	1.35146	?	4	76344550	76345590	1						0
ENSG00000237064	EIF3IP1	eukaryotic translation initiation factor 3 subunit I pseudogene 1	2.71433	0	3.67516	0.0661981	1.17915	?	7	109959218	109960184	1						0
ENSG00000277186	AC131212.1	NA	2.40628	0	3.48263	0.0596773	1.22419	?	12	132593031	132593698		1					0
ENSG00000239393	AC146507.1	NA	2.379	0	3.4752	0.148606	0.827962	?	5	177346073	177346426		1					0
ENSG00000244361	RPL30P7	ribosomal protein L30 pseudogene 7	2.37548	0	3.47288	0.0684451	1.16466	?	5	10488820	10489142	1						0
ENSG00000138075	ABCG5	ATP binding cassette subfamily G member 5	2.37196	0	3.47169	0.0914463	1.03883	?	2	43812843	43813309							1
ENSG00000247081	BAALC-AS1	BAALC antisense RNA 1	2.36844	0	3.47002	0.175124	0.756655	?	8	103285733	103285902							1
ENSG00000222370 #or# ENSG00000281696	SNORA36B	small nucleolar RNA, H/ACA box 36B #or# microRNA 664a	2.35831	0	3.46573	0.112217	0.949942	?	1	220200546	220200676					1		0
ENSG00000083635 #or# ENSG00000223732	AL359706.1	NUFIP1, FMR1 interacting protein 1 #or# NA	2.35128	0	3.46473	0.0632853	1.1987	?	13	44982077	44982154		1					0
ENSG00000258314	AL589182.1	NA	2.34776	0	3.46448	0.0540517	1.26719	?	14	19055390	19055551		1					0
ENSG00000239791	AC002310.2	NA	2.35479	0	3.46431	0.10534	0.977407	?	16	30582530	30583860		1					0
ENSG00000203780	FANK1	fibronectin type III and ankyrin repeat domains 1	2.34776	0	3.46364	0.0623265	1.20533	?	10	126009054	126009590							1
ENSG00000229927 /// ENSG00000165874 #or# ENSG00000229927	RHEBP1	RHEB pseudogene 1 /// family with sequence similarity 35 member B, pseudogene #or# RHEB pseudogene 1	2.35128	0	3.46318	0.0932999	1.03012	?	10	46634911	46635466	1						0
ENSG00000271784	AL031055.1	NA	2.34424	0	3.4586	0.13945	0.85558	?	20	46689659	46690289		1					0
ENSG00000123999	INHA	inhibin subunit alpha	2.33059	0	3.45201	0.144058	0.841463	?	2	219575527	219575713							1
ENSG00000280832	GSEC	G-quadruplex forming sequence containing lncRNA	5.88193	0.73113	3.35243	0.0241632	1.61684	3.00809	11	126350172	126351777							1
ENSG00000205918	PDPK2P	3-phosphoinositide dependent protein kinase 2, pseudogene	2.0397	0	3.25186	0.482503	0.3165	?	16	2633898	2634827	1						0
ENSG00000006534	ALDH3B1	aldehyde dehydrogenase 3 family member B1	2.00186	0	3.2213	0.142164	0.847211	?	11	68024229	68024615							1
ENSG00000251726	RNU7-41P	RNA, U7 small nuclear 41 pseudogene	2.00186	0	3.21913	0.103704	0.984203	?	14	34845300	34845360	1						0
ENSG00000279623	AL359697.1	NA	2.00186	0	3.21705	0.0815321	1.08867	?	10	21865335	21865921		1					0
ENSG00000176463	SLCO3A1	solute carrier organic anion transporter family member 3A1	2.00186	0	3.21683	0.0796902	1.0986	?	15	92170872	92172435							1
ENSG00000151651	ADAM8	ADAM metallopeptidase domain 8	5.12809	0.461841	3.18034	0.0573455	1.2415	3.47295	10	133273305	133273430							1
ENSG00000143502	SUSD4	sushi domain containing 4	5.09685	0.461841	3.16626	0.0371107	1.4305	3.46414	1	223358825	223359121							1
ENSG00000283545 /// ENSG00000283414 /// ENSG00000283575 /// ENSG00000283418	RF00026	NA	4.74083	0.461841	3.06324	0.060289	1.21976	3.35967	1	180758722	180758817		1					0
ENSG00000232388 #or# ENSG00000284776	AL121900.2	small integral membrane protein 26 #or# NA	4.74039	0.73113	3.02998	0.0471819	1.32622	2.69681	20	18567453	18567478		1					0
ENSG00000083828	ZNF586	zinc finger protein 586	4.74743	0.73113	3.02805	0.0499545	1.30143	2.69895	19	57779348	57780544							1
ENSG00000243753	HLA-L	major histocompatibility complex, class I, L (pseudogene)	4.40814	0.461841	2.94136	0.0593496	1.22658	3.2547	6	30261587	30261703	1						0
ENSG00000116329	OPRD1	opioid receptor delta 1	4.37382	0.73113	2.90752	0.0584214	1.23343	2.58069	1	28812142	28812383							1
ENSG00000245482	AC046130.1	NA	4.31881	0.73113	2.89493	0.064429	1.19092	2.56243	12	34022281	34024134		1					0
ENSG00000272008	AL139274.2	NA	4.36017	0.73113	2.89067	0.077051	1.11322	2.57619	6	87151159	87155285		1					0
ENSG00000161328	LRRC56	leucine rich repeat containing 56	3.96588	0.461841	2.80555	0.0937219	1.02816	3.10217	11	554277	554916							1
ENSG00000264940	SNORD3C	small nucleolar RNA, C/D box 3C	3.90383	0.73113	2.75058	0.0835454	1.07808	2.41669	17	19190029	19190245					1		0
ENSG00000197332	AC008543.1	NA	3.5751	0.461841	2.65608	0.118099	0.927755	2.95252	19	11684876	11686569		1					0
ENSG00000207264	RNU6-15P	RNA, U6 small nuclear 15, pseudogene	3.54429	0.461841	2.64789	0.115369	0.937909	2.94003	10	21321961	21322067	1						0
ENSG00000250770	AC005865.2	NA	3.55793	0.461841	2.64773	0.105399	0.977165	2.94557	12	3298696	3300441		1					0
ENSG00000074527	NTN4	netrin 4	3.56145	0.461841	2.64553	0.097528	1.01087	2.947	12	95787413	95787468							1
ENSG00000215158	AC138409.2	NA	3.55442	0.461841	2.6449	0.0994625	1.00234	2.94415	5	34199797	34200921		1					0
ENSG00000268140	PCGF7P	polycomb group ring finger 7 pseudogene	3.56497	0.461841	2.64463	0.093725	1.02814	2.94842	19	22137931	22138981	1						0
ENSG00000182747	SLC35D3	solute carrier family 35 member D3	3.52361	0.73113	2.60706	0.0955032	1.01998	2.26885	6	136924697	136925639							1
ENSG00000227617	CERS6-AS1	CERS6 antisense RNA 1	3.54077	0.73113	2.60419	0.102642	0.988677	2.27586	2	168783139	168783471							1
ENSG00000103196	CRISPLD2	cysteine rich secretory protein LCCL domain containing 2	3.53373	0.73113	2.59136	0.118947	0.924648	2.27299	16	84920397	84920768							1
ENSG00000284689	OR7E84P	olfactory receptor family 7 subfamily E member 84 pseudogene	3.56497	0.73113	2.58172	0.144638	0.839718	2.28569	4	9468974	9469983	1						0
ENSG00000178301	AQP11	aquaporin 11	6.69077	1.19297	2.56006	0.026706	1.57339	2.48761	11	77609378	77610355							1
ENSG00000279114	Z99129.3	NA	3.53725	0.73113	2.55635	0.175445	0.755859	2.27443	6	122477851	122484161		1					0
ENSG00000138623	SEMA7A	semaphorin 7A (John Milton Hagen blood group)	6.29647	0.923681	2.51925	0.0427855	1.3687	2.76908	15	74410968	74411356							1
ENSG00000203808	BVES-AS1	BVES antisense RNA 1	3.17772	0.461841	2.49525	0.178343	0.748743	2.78252	6	105159018	105159037							1
ENSG00000260905	AC009021.1	NA	3.16716	0.461841	2.48178	0.141065	0.850581	2.77772	16	22612543	22612887		1					0
ENSG00000165060 #or# ENSG00000285130 /// ENSG00000285130	AL358113.1	NA /// frataxin #or# NA	3.16716	0.461841	2.47916	0.132876	0.876554	2.77772	9	69216339	69216366		1					0
ENSG00000183281	PLGLB1	plasminogen-like B1	3.15351	0.461841	2.47723	0.136771	0.864006	2.77149	2	87015652	87015949							1
ENSG00000103154	NECAB2	N-terminal EF-hand calcium binding protein 2	3.15351	0.461841	2.4759	0.132186	0.878813	2.77149	16	84002347	84002776							1
ENSG00000183246	RIMBP3C	RIMS binding protein 3C	3.14647	0.461841	2.47313	0.127923	0.89305	2.76827	22	21545678	21546056							1
ENSG00000240005	AC106047.1	NA	5.88501	0.923681	2.44416	0.0690987	1.16053	2.67158	4	26859809	26860028		1					0
ENSG00000273679	AC100757.1	NA	5.98138	0.923681	2.44159	0.0547086	1.26194	2.69501	15	22371736	22373570		1					0
ENSG00000196189	SEMA4A	semaphorin 4A	3.14999	0.73113	2.43345	0.131443	0.881264	2.10715	1	156176405	156176656							1
ENSG00000267741	UBE2L4	ubiquitin conjugating enzyme E2 L4 (pseudogene)	6.35851	1.46226	2.43276	0.0394201	1.40428	2.12049	19	9774497	9774960	1						0
ENSG00000188033 #or# ENSG00000269693	AC010422.6	zinc finger protein 490 #or# NA	3.16716	0.73113	2.43222	0.138581	0.858296	2.11499	19	12525720	12527916		1					0
ENSG00000128408	RIBC2	RIB43A domain with coiled-coils 2	5.90569	0.923681	2.42993	0.0542313	1.26575	2.67664	22	45430900	45431016							1
ENSG00000172350	ABCG4	ATP binding cassette subfamily G member 4	3.1742	0.73113	2.42948	0.145804	0.836232	2.11819	11	119158234	119158495							1
ENSG00000114656	KIAA1257	KIAA1257	3.19136	0.73113	2.42461	0.161527	0.791754	2.12597	3	128977013	128977066							1
ENSG00000139899	CBLN3	cerebellin 3 precursor	3.19136	0.73113	2.42442	0.161884	0.790797	2.12597	14	24427605	24427788							1
ENSG00000136040	PLXNC1	plexin C1	5.93341	1.19297	2.38036	0.0443693	1.35292	2.3143	12	94279472	94279986							1
ENSG00000154856	APCDD1	APC down-regulated 1	5.52547	0.923681	2.31902	0.0551682	1.25831	2.58063	18	10487590	10487814							1
ENSG00000275542	AC027601.3	NA	2.7557	0.461841	2.31151	0.324891	0.488262	2.57695	17	81339183	81339691		1					0
ENSG00000279923	AC022417.1	NA	2.78342	0.461841	2.30083	0.206763	0.684528	2.59139	5	31558573	31559875		1					0
ENSG00000102057	KCND1	potassium voltage-gated channel subfamily D member 1	2.77638	0.461841	2.29959	0.211369	0.67496	2.58774	0	48966090	48966305							1
ENSG00000229052	AL449283.1	NA	2.8041	0.461841	2.29914	0.180454	0.743632	2.60207	1	92931579	92932091		1					0
ENSG00000229832	AL360091.1	NA	2.76274	0.461841	2.29708	0.220788	0.656024	2.58063	1	212357916	212358353		1					0
ENSG00000259413	AC011270.1	NA	2.77638	0.461841	2.29601	0.19726	0.704961	2.58774	15	78382573	78383155		1					0
ENSG00000274272 /// ENSG00000205307 #or# ENSG00000274272	AC069281.2	NA /// Sin3A associated protein 25 #or# NA	2.74557	0.461841	2.29537	0.244583	0.611574	2.57164	7	100572232	100572571		1					0
ENSG00000101546 #or# ENSG00000267127 /// ENSG00000261126 #or# ENSG00000267127 /// ENSG00000267127	AC090360.1	ribosome binding factor A #or# NA /// NA /// RBFA downstream neighbor (non-protein coding) #or# NA	2.76274	0.461841	2.29395	0.206507	0.685065	2.58063	18	80095288	80095457		1					0
ENSG00000249098	AC055733.1	NA	8.27104	1.65481	2.2913	0.0200205	1.69852	2.3214	3	130918226	130918703		1					0
ENSG00000188596	CFAP54	cilia and flagella associated protein 54	2.76626	0.461841	2.28981	0.185095	0.732606	2.58247	12	96765077	96765270							1
ENSG00000234213	FHP1	fumarate hydratase pseudogene 1	2.74909	0.461841	2.28974	0.207454	0.683078	2.57349	13	42255873	42256575	1						0
ENSG00000004838	ZMYND10	zinc finger MYND-type containing 10	2.72489	0.461841	2.28847	0.250385	0.601391	2.56073	3	50344839	50344958							1
ENSG00000055955 #or# ENSG00000243696 /// ENSG00000055955	ITIH4	inter-alpha-trypsin inhibitor heavy chain family member 4 /// inter-alpha-trypsin inhibitor heavy chain family member 4 #or# NA	2.76626	0.461841	2.28568	0.170106	0.769281	2.58247	3	52829860	52830670							1
ENSG00000273447	AC004067.1	NA	2.75922	0.461841	2.28564	0.17666	0.752861	2.57879	4	109692004	109692703		1					0
ENSG00000122986	HVCN1	hydrogen voltage gated channel 1	2.72489	0.461841	2.27999	0.195794	0.7082	2.56073	12	110682655	110683264							1
ENSG00000198723	TEX45	testis expressed 45	5.47355	1.19297	2.26269	0.0832894	1.07941	2.19792	19	7508206	7508447							1
ENSG00000206932	RNU6-4P	RNA, U6 small nuclear 4, pseudogene	7.8631	1.38552	2.26192	0.0306764	1.5132	2.50467	3	181231737	181231843	1						0
ENSG00000272767	JMJD1C-AS1	JMJD1C antisense RNA 1	2.7799	0.73113	2.2524	0.154389	0.811382	1.92683	10	63465229	63466563							1
ENSG00000275993	SIK1B	salt inducible kinase 1B (putative)	10.6637	2.11665	2.25123	0.0111447	1.95293	2.33285	21	6112739	6112956							1
ENSG00000260259	LINC02166	long intergenic non-protein coding RNA 2166	2.75922	0.73113	2.25078	0.151923	0.818375	1.91606	16	89682620	89682842			1				0
ENSG00000142178	SIK1	salt inducible kinase 1	13.4022	2.84778	2.24346	0.00512697	2.29014	2.23456	21	43425306	43425523							1
ENSG00000136960	ENPP2	ectonucleotide pyrophosphatase/phosphodiesterase 2	2.76274	0.73113	2.24128	0.169377	0.771145	1.9179	8	119616269	119616384							1
ENSG00000271020	AC112220.2	NA	2.76274	0.73113	2.23919	0.173067	0.761786	1.9179	3	33797149	33797681		1					0
ENSG00000267390	AC036176.1	NA	2.75922	0.73113	2.23636	0.176799	0.752521	1.91606	18	63381377	63381629		1					0
ENSG00000213658 /// ENSG00000213658 #or# ENSG00000261067	LAT	linker for activation of T cells /// linker for activation of T cells #or# NA	2.76626	0.73113	2.23192	0.187541	0.726903	1.91973	16	28990189	28990455							1
ENSG00000050767	COL23A1	collagen type XXIII alpha 1 chain	2.74557	0.73113	2.22702	0.187947	0.725964	1.90891	5	178523505	178523713							1
ENSG00000281207	SLFNL1-AS1	SLFNL1 antisense RNA 1	2.77638	0.73113	2.22192	0.210796	0.676138	1.925	1	41043115	41043890							1
ENSG00000225882	LINC01456	long intergenic non-protein coding RNA 1456	2.74557	0.73113	2.21774	0.203975	0.690423	1.90891	0	17970197	17970430			1				0
ENSG00000259744	AC009269.4	NA	2.7799	0.73113	2.21392	0.228053	0.641964	1.92683	15	70848883	70849098		1					0
ENSG00000204282	TNRC6C-AS1	TNRC6C antisense RNA 1	2.77286	0.73113	2.21202	0.227755	0.642533	1.92317	17	78107398	78107840							1
ENSG00000282458	AC008993.1	NA	2.74205	0.73113	2.20188	0.230316	0.637675	1.90706	19	70652	71626		1					0
ENSG00000124743	KLHL31	kelch like family member 31	2.73853	0.73113	2.19343	0.243604	0.613315	1.9052	6	53651598	53651600							1
ENSG00000241281	AC010683.1	NA	5.17957	1.19297	2.17171	0.0957026	1.01908	2.11827	4	147425974	147426351		1					0
ENSG00000236668	AC006450.3	NA	7.91811	2.19339	2.1532	0.0309966	1.50869	1.85199	9	124006277	124008091		1					0
ENSG00000143450 #or# ENSG00000232937 /// ENSG00000143450	OAZ3	ornithine decarboxylase antizyme 3 #or# NA /// ornithine decarboxylase antizyme 3	5.13821	1.46226	2.13437	0.0715235	1.14555	1.81307	1	151771220	151771330							1
ENSG00000270996	AC005034.4	NA	2.39264	0.461841	2.08607	0.279297	0.553934	2.37314	2	75719120	75720018		1					0
ENSG00000176593	AC008969.1	NA	2.4098	0.461841	2.08159	0.240932	0.618106	2.38345	19	58009331	58009930		1					0
ENSG00000224066	AL049795.1	NA	2.35128	0.461841	2.08046	0.349522	0.456525	2.34798	1	32205498	32205758		1					0
ENSG00000249593	AC011405.1	NA	2.35128	0.461841	2.07723	0.32687	0.485625	2.34798	5	139051002	139051203		1					0
ENSG00000129673	AANAT	aralkylamine N-acetyltransferase	2.3856	0.461841	2.07691	0.253613	0.595828	2.36888	17	76468610	76468632							1
ENSG00000221857 #or# ENSG00000266964	AC020907.2	NA #or# FXYD domain containing ion transport regulator 1	2.39264	0.461841	2.07689	0.244426	0.611853	2.37314	19	35151254	35151336		1					0
ENSG00000229939	AL589880.1	NA	2.38912	0.461841	2.07682	0.248557	0.604574	2.37101	0	111618808	111619094		1					0
ENSG00000255394	C8orf49	chromosome 8 open reading frame 49 (putative)	2.39264	0.461841	2.07671	0.243813	0.612943	2.37314	8	11761387	11762800							1
ENSG00000226944	AL031847.1	NA	2.35128	0.461841	2.07448	0.308929	0.510141	2.34798	1	6204840	6204982		1					0
ENSG00000227425	MRPS21P2	mitochondrial ribosomal protein S21 pseudogene 2	2.37196	0.461841	2.07202	0.253236	0.596475	2.36061	1	157861197	157861460	1						0
ENSG00000272417	AC034229.4	NA	2.36844	0.461841	2.07199	0.258738	0.58714	2.35847	5	10203600	10204040		1					0
ENSG00000089199	CHGB	chromogranin B	2.34776	0.461841	2.06942	0.286894	0.542278	2.34582	20	5916826	5917980							1
ENSG00000215007	DNAJA1P3	DnaJ heat shock protein family (Hsp40) member A1 pseudogene 3	2.37196	0.461841	2.06912	0.241192	0.617637	2.36061	0	107351650	107352843	1						0
ENSG00000233057	EEF1A1P14	eukaryotic translation elongation factor 1 alpha 1 pseudogene 14	2.3856	0.461841	2.0658	0.215655	0.66624	2.36888	1	194188967	194190342	1						0
ENSG00000260464	AL049796.1	NA	2.35128	0.461841	2.06508	0.254705	0.593962	2.34798	1	93847174	93848939		1					0
ENSG00000261187	AC079322.1	NA	2.35128	0.461841	2.06425	0.250345	0.601461	2.34798	15	72465128	72466262		1					0
ENSG00000126759	CFP	complement factor properdin	2.35479	0.461841	2.06374	0.241819	0.61651	2.35013	0	47628122	47628277							1
ENSG00000241489 #or# ENSG00000241769 /// ENSG00000241769	LINC00893	long intergenic non-protein coding RNA 893 /// NA #or# long intergenic non-protein coding RNA 893	2.34776	0.461841	2.06213	0.245458	0.610023	2.34582	0	149536173	149536255			1				0
ENSG00000187688	TRPV2	transient receptor potential cation channel subfamily V member 2	2.35128	0.461841	2.06203	0.238977	0.621644	2.34798	17	16436789	16437003							1
ENSG00000273243	Z82243.1	NA	2.35128	0.461841	2.05999	0.228883	0.640387	2.34798	22	45155539	45156011		1					0
ENSG00000107104 #or# ENSG00000226403	AL392089.1	KN motif and ankyrin repeat domains 1 #or# NA	4.78176	1.19297	2.05909	0.0999806	1.00008	2.00298	9	549107	549531		1					0
ENSG00000278570	NR2E3	nuclear receptor subfamily 2 group E member 3	2.33411	0.461841	2.05908	0.254131	0.594943	2.33741	15	71818214	71818248							1
ENSG00000143217	NECTIN4	nectin cell adhesion molecule 4	2.379	0.461841	2.05763	0.195647	0.708528	2.36489	1	161072140	161072885							1
ENSG00000272662	AC073352.1	NA	2.33763	0.461841	2.0565	0.230818	0.63673	2.33958	3	119497678	119498181		1					0
ENSG00000225930	LINC02249	long intergenic non-protein coding RNA 2249	4.76811	1.19297	2.05435	0.114237	0.942192	1.99886	15	30210408	30210806			1				0
ENSG00000123407	HOXC12	homeobox C12	2.33763	0.461841	2.05334	0.211799	0.674076	2.33958	12	53956567	53958956							1
ENSG00000136059	VILL	villin like	4.71971	1.19297	2.0518	0.097803	1.00965	1.98414	3	38006181	38006204							1
ENSG00000267249	AP005482.3	NA	2.38912	0.73113	2.02038	0.225809	0.646259	1.70828	18	12670426	12671145		1					0
ENSG00000137440	FGFBP1	fibroblast growth factor binding protein 1	2.35128	0.73113	2.01722	0.217267	0.663005	1.68524	4	15935569	15935927							1
ENSG00000225447	RPS15AP10	ribosomal protein S15a pseudogene 10	4.35313	0.923681	2.01556	0.155192	0.80913	2.23659	1	45645816	45646197	1						0
ENSG00000265393	AC084125.4	NA	4.33245	0.923681	2.01493	0.160666	0.794075	2.22972	8	144513606	144513672		1					0
ENSG00000270182	AC004080.4	NA	2.35479	0.73113	2.01349	0.225159	0.64751	1.6874	7	27158344	27158976		1					0
ENSG00000103647	CORO2B	coronin 2B	2.43048	0.73113	2.01314	0.266255	0.574702	1.73304	15	68725975	68727803							1
ENSG00000228232	GAPDHP1	glyceraldehyde-3-phosphate dehydrogenase pseudogene 1	2.3856	0.73113	2.01051	0.244481	0.611755	1.70615	0	39787132	39788136	1						0
ENSG00000272696	AL359091.4	NA	4.31177	0.923681	2.00633	0.15561	0.807963	2.22281	9	128316337	128316909		1					0
ENSG00000115423	DNAH6	dynein axonemal heavy chain 6	4.32541	0.923681	2.00025	0.143807	0.842221	2.22737	2	84697575	84697842							1
ENSG00000103489	XYLT1	xylosyltransferase 1	2.37548	9.46703	-2.00433	0.0371687	1.42982	-1.99469	16	17355228	17355415							1
ENSG00000108797	CNTNAP1	contactin associated protein 1	1.96402	8.42753	-2.00946	0.0326099	1.48665	-2.1013	17	42690739	42690921							1
ENSG00000213935	RPL22P16	ribosomal protein L22 pseudogene 16	0.774518	3.04033	-2.01076	0.217083	0.663375	-1.97286	7	4865432	4865804	1						0
ENSG00000269694	AC005197.1	NA	0.778038	3.38636	-2.01564	0.205784	0.686589	-2.12182	19	18883087	18883376		1					0
ENSG00000133636	NTS	neurotensin	0.815881	3.04033	-2.01573	0.161056	0.793023	-1.8978	12	85882223	85882799							1
ENSG00000214192	UBE2V1P2	ubiquitin conjugating enzyme E2 V1 pseudogene 2	0.774518	3.04033	-2.0192	0.188631	0.724386	-1.97286	3	175718231	175718670	1						0
ENSG00000259448	LINC02352	long intergenic non-protein coding RNA 2352	0.815881	3.30962	-2.0701	0.170158	0.769148	-2.02024	15	31223995	31224445			1				0
ENSG00000170961	HAS2	hyaluronan synthase 2	0.798719	3.30962	-2.07582	0.185219	0.732315	-2.05091	8	121612116	121614108							1
ENSG00000283057	AC010653.3	NA	0.795199	3.30962	-2.0769	0.192635	0.715265	-2.05728	16	71777603	71777834		1					0
ENSG00000272189	AL024508.2	NA	0.781558	3.30962	-2.08491	0.180435	0.74368	-2.08224	6	136550661	136552554		1					0
ENSG00000117586	TNFSF4	TNF superfamily member 4	0.778038	3.30962	-2.08779	0.161402	0.792091	-2.08875	1	173188464	173188569							1
ENSG00000154080	CHST9	carbohydrate sulfotransferase 9	1.9605	8.27406	-2.08779	0.0188315	1.72511	-2.07738	18	26915779	26917327							1
ENSG00000255458	AC108471.2	NA	0.778038	3.30962	-2.08808	0.157048	0.803969	-2.08875	4	39666123	39666568		1					0
ENSG00000175197	DDIT3	DNA damage inducible transcript 3	47.7098	205.349	-2.104	2.06887e-23	22.6843	-2.10572	12	57517476	57517542							1
ENSG00000185482	STAC3	SH3 and cysteine rich domain 3	0.795199	3.23288	-2.11421	0.224615	0.648561	-2.02343	12	57249019	57249308							1
ENSG00000182600 /// ENSG00000182600 #or# ENSG00000204120	SNORC	secondary ossification center associated regulator of chondrocyte maturation /// secondary ossification center associated regulator of chondrocyte maturation #or# GRB10 interacting GYF protein 2	1.16882	5.23372	-2.1279	0.0682431	1.16594	-2.16279	2	232878452	232878708					1		0
ENSG00000244146	AC106872.3	NA	1.16882	5.23372	-2.1321	0.0843791	1.07377	-2.16279	4	164920618	164921063		1					0
ENSG00000279355	AGPAT4-IT1	AGPAT4 intronic transcript 1	1.1653	5.23372	-2.13401	0.087694	1.05703	-2.16714	6	161160105	161161982							1
ENSG00000280164	CU638689.5	NA	1.59392	7.15782	-2.14763	0.047322	1.32494	-2.16694	21	6724393	6725209		1					0
ENSG00000153936 #or# ENSG00000267561 /// ENSG00000267272 #or# ENSG00000267561	AC093155.3	long intergenic non-protein coding RNA 1140 #or# NA /// heparan sulfate 2-O-sulfotransferase 1 #or# NA	0.781558	3.23288	-2.15183	0.165537	0.781106	-2.0484	1	87168177	87169204		1					0
ENSG00000099958	DERL3	derlin 3	23.3323	104.674	-2.1538	4.06047e-13	12.3914	-2.16551	22	23836767	23837154							1
ENSG00000274756	AC243732.1	NA	0.795199	3.57891	-2.15658	0.218487	0.660575	-2.17013	17	36574462	36575325		1					0
ENSG00000244161	FLNB-AS1	FLNB antisense RNA 1	1.57676	7.50385	-2.15818	0.0512406	1.29039	-2.25067	3	58163973	58164312							1
ENSG00000213237	AC008155.1	NA	0.387259	2.19339	-2.18879	0.206642	0.684782	-2.50179	7	138404195	138404523		1					0
ENSG00000178726	THBD	thrombomodulin	1.16882	5.57975	-2.19318	0.174391	0.758475	-2.25515	20	23045633	23047776							1
ENSG00000153563	CD8A	CD8a molecule	1.20314	5.42627	-2.21741	0.059331	1.22672	-2.17316	2	86785920	86785922							1
ENSG00000142961	MOB3C	MOB kinase activator 3C	0.798719	3.8482	-2.21795	0.150897	0.82132	-2.26842	1	46610002	46610204							1
ENSG00000243444	PALM2	paralemmin 2	0.774518	3.8482	-2.23023	0.149288	0.825977	-2.31281	9	109923735	109923849							1
ENSG00000000971	CFH	complement factor H	0.387259	2.19339	-2.23065	0.235328	0.628326	-2.50179	1	196740619	196741086							1
ENSG00000272405	AL365181.3	NA	0.795199	3.8482	-2.23463	0.188848	0.723888	-2.2748	1	156641666	156644887		1					0
ENSG00000117115	PADI2	peptidyl arginine deiminase 2	1.18246	5.96485	-2.28954	0.0348791	1.45743	-2.3347	1	17079031	17079259							1
ENSG00000187595	ZNF385C	zinc finger protein 385C	0.774518	3.77146	-2.29343	0.10446	0.98105	-2.28375	17	42061239	42063058							1
ENSG00000257135	AC007249.2	NA	0.795199	4.11749	-2.29753	0.148081	0.829501	-2.37238	2	10450436	10450794		1					0
ENSG00000157103	SLC6A1	solute carrier family 6 member 1	0.387259	2.19339	-2.30483	0.352841	0.452422	-2.50179	3	11036862	11039169							1
ENSG00000273181	AC131235.4	NA	0.778038	4.11749	-2.30676	0.146524	0.834091	-2.40385	3	184132942	184133561		1					0
ENSG00000176720	BOK	BOK, BCL2 family apoptosis regulator	1.18598	5.61883	-2.31023	0.0483414	1.31568	-2.24419	2	241572423	241574138							1
ENSG00000279204 /// ENSG00000245812 #or# ENSG00000279204	AC134043.2	NA /// long intergenic non-protein coding RNA 2202 #or# NA	0.387259	2.19339	-2.31152	0.372712	0.428626	-2.50179	5	159106380	159108617		1					0
ENSG00000267332	BOLA3P2	bolA family member 3 pseudogene 2	0.798719	4.11749	-2.32491	0.215768	0.666013	-2.36601	19	9019787	9019984	1						0
ENSG00000176697	BDNF	brain derived neurotrophic factor	0.390779	2.19339	-2.33671	0.481813	0.317121	-2.48874	11	27654893	27657820							1
ENSG00000165591	FAAH2	fatty acid amide hydrolase 2	0.387259	2.11665	-2.33872	0.315117	0.501528	-2.45041	0	57452131	57452166							1
ENSG00000011465	DCN	decorin	0.390779	2.11665	-2.33937	0.309026	0.510005	-2.43736	12	91179199	91179732							1
ENSG00000172404	DNAJB7	DnaJ heat shock protein family (Hsp40) member B7	0.40794	2.11665	-2.33949	0.308002	0.511447	-2.37535	22	40859549	40861064							1
ENSG00000214455	RCN1P2	reticulocalbin 1 pseudogene 2	0.40794	2.11665	-2.34021	0.301482	0.520738	-2.37535	13	45390353	45391267	1						0
ENSG00000175564	UCP3	uncoupling protein 3	0.387259	2.11665	-2.34035	0.30026	0.522503	-2.45041	11	74007043	74007304							1
ENSG00000212027	MIR374B	microRNA 374b	0.390779	2.19339	-2.34093	0.508459	0.293744	-2.48874	0	74218547	74218618				1			0
ENSG00000227583	RPS3AP37	ribosomal protein S3a pseudogene 37	0.387259	2.11665	-2.34459	0.266816	0.573788	-2.45041	10	68674356	68675100	1						0
ENSG00000232656	IDI2-AS1	IDI2 antisense RNA 1	0.40794	2.11665	-2.34473	0.265843	0.575374	-2.37535	10	1043761	1044024							1
ENSG00000278993	AC002350.1	NA	0.390779	2.11665	-2.34537	0.261374	0.582737	-2.43736	12	110501614	110503441		1					0
ENSG00000181585	TMIE	transmembrane inner ear	0.40794	2.11665	-2.34576	0.258729	0.587155	-2.37535	3	46709689	46710886							1
ENSG00000269420	PLA2G4C-AS1	PLA2G4C antisense RNA 1	0.390779	2.19339	-2.34722	0.555834	0.255055	-2.48874	19	48061913	48062222							1
ENSG00000271643	AC112220.4	NA	1.1895	5.88812	-2.35031	0.0373679	1.4275	-2.30745	3	33795688	33796950		1					0
ENSG00000078795	PKD2L2	polycystin 2 like 2, transient receptor potential cation channel	0.40794	2.11665	-2.35068	0.228783	0.640577	-2.37535	5	137894353	137894355							1
ENSG00000268364	SMC5-AS1	SMC5 antisense RNA 1 (head to head)	0.390779	2.11665	-2.35108	0.226628	0.644686	-2.43736	9	70193997	70194555							1
ENSG00000203739	AL645568.1	NA	0.390779	2.11665	-2.35414	0.211053	0.675609	-2.43736	1	173418074	173418622		1					0
ENSG00000259146	AC005476.2	NA	0.40794	2.11665	-2.35429	0.210346	0.677066	-2.37535	14	71307170	71307363		1					0
ENSG00000233864	TTTY15	testis-specific transcript, Y-linked 15 (non-protein coding)	0.390779	2.11665	-2.35633	0.201004	0.696794	-2.43736	0	12687685	12688255							1
ENSG00000184788	SATL1	spermidine/spermine N1-acetyl transferase like 1	0.40794	2.11665	-2.3568	0.198969	0.701216	-2.37535	0	85208776	85212077							1
ENSG00000123243	ITIH5	inter-alpha-trypsin inhibitor heavy chain family member 5	0.387259	2.11665	-2.35947	0.187941	0.725979	-2.45041	10	7576892	7577012							1
ENSG00000260176	AC141586.2	NA	0.390779	2.11665	-2.36017	0.185222	0.732308	-2.43736	16	2644084	2644190		1					0
ENSG00000225462	FDPSP1	farnesyl diphosphate synthase pseudogene 1	0.40794	2.11665	-2.3602	0.185136	0.732508	-2.37535	1	187563061	187564131	1						0
ENSG00000232612	RPL31P35	ribosomal protein L31 pseudogene 35	0.390779	2.11665	-2.3606	0.183594	0.736142	-2.43736	7	54656358	54656734	1						0
ENSG00000130545	CRB3	crumbs 3, cell polarity complex component	0.390779	2.11665	-2.36063	0.183479	0.736413	-2.43736	19	6466673	6466769							1
ENSG00000233707	RPL22P11	ribosomal protein L22 pseudogene 11	0.40794	2.11665	-2.36144	0.180469	0.743598	-2.37535	2	109737139	109737523	1						0
ENSG00000272864	AC135803.1	NA	0.387259	2.11665	-2.36177	0.179284	0.746458	-2.45041	1	74698769	74699333		1					0
ENSG00000258778	AL161670.2	NA	0.387259	2.11665	-2.36245	0.176832	0.752439	-2.45041	14	63734697	63735923		1					0
ENSG00000270207	AC068313.1	NA	0.387259	2.11665	-2.36285	0.175423	0.755913	-2.45041	3	7606890	7607897		1					0
ENSG00000144158	AL078621.1	NA	0.390779	2.11665	-2.36316	0.174321	0.758649	-2.43736	2	113657908	113658675		1					0
ENSG00000188738	FSIP2	fibrous sheath interacting protein 2	0.390779	2.11665	-2.3635	0.173167	0.761535	-2.43736	2	185833090	185833289							1
ENSG00000139329	LUM	lumican	0.387259	2.11665	-2.36393	0.171704	0.765218	-2.45041	12	91104139	91104319							1
ENSG00000105398	SULT2A1	sulfotransferase family 2A member 1	0.390779	2.11665	-2.37324	0.144486	0.840175	-2.43736	19	47870466	47871454							1
ENSG00000184305	CCSER1	coiled-coil serine rich protein 1	0.390779	2.11665	-2.37582	0.138213	0.859452	-2.43736	4	90951114	90951312							1
ENSG00000250821	EXOC1L	exocyst complex component 1 like	0.774518	4.31004	-2.37811	0.0651718	1.18594	-2.47633	4	55837085	55837382							1
ENSG00000188869	TMC3	transmembrane channel like 3	0.795199	4.31004	-2.40891	0.124469	0.904937	-2.43831	15	81337642	81337924							1
ENSG00000264066 #or# ENSG00000284565	MIR451A	NA #or# microRNA 451a	3.2292	17.3169	-2.42134	0.143706	0.842525	-2.42293	17	28861369	28861440				1			0
ENSG00000142552	RCN3	reticulocalbin 3	0.40794	2.38594	-2.44867	0.131443	0.881264	-2.54813	19	49543214	49543633							1
ENSG00000253854	AC010834.3	NA	0.40794	2.38594	-2.4527	0.143152	0.844201	-2.54813	8	93720769	93721167		1					0
ENSG00000224282	AC010469.1	NA	0.390779	2.38594	-2.45638	0.156011	0.806844	-2.61013	5	31822561	31823136		1					0
ENSG00000277945	AC107308.1	NA	0.390779	2.38594	-2.45698	0.158332	0.80043	-2.61013	12	65830750	65831050		1					0
ENSG00000012779	ALOX5	arachidonate 5-lipoxygenase	0.387259	2.38594	-2.45797	0.162369	0.789496	-2.62319	10	45443728	45444214							1
ENSG00000278963	AC005921.3	NA	0.390779	2.38594	-2.45834	0.163901	0.785419	-2.61013	17	50722074	50724224		1					0
ENSG00000042781	USH2A	usherin	0.40794	2.38594	-2.4595	0.168991	0.772137	-2.54813	1	216173946	216175237							1
ENSG00000125730	C3	complement C3	0.40794	2.38594	-2.46109	0.17648	0.753304	-2.54813	19	6719355	6719403							1
ENSG00000228412	AL022068.1	NA	0.390779	2.38594	-2.46297	0.186249	0.729905	-2.61013	6	19803716	19803910		1					0
ENSG00000178162	FAR2P2	fatty acyl-CoA reductase 2 pseudogene 2	0.387259	2.38594	-2.46397	0.191918	0.716885	-2.62319	2	130426192	130426263	1						0
ENSG00000214198	TTC41P	tetratricopeptide repeat domain 41, pseudogene	0.40794	2.38594	-2.46666	0.208975	0.679906	-2.54813	12	103914962	103916083	1						0
ENSG00000239978	OR7E53P	olfactory receptor family 7 subfamily E member 53 pseudogene	0.40794	2.38594	-2.46702	0.211497	0.674696	-2.54813	3	125734295	125735198	1						0
ENSG00000273137	AL022328.2	NA	0.387259	2.38594	-2.47356	0.270382	0.568023	-2.62319	22	50208461	50208769		1					0
ENSG00000243709	LEFTY1	left-right determination factor 1	0.387259	2.38594	-2.47438	0.28002	0.552811	-2.62319	1	225887977	225888032							1
ENSG00000218682	AC064847.1	NA	0.387259	2.38594	-2.47629	0.305436	0.515079	-2.62319	2	25856461	25856966		1					0
ENSG00000271973	AC141002.1	NA	0.390779	2.38594	-2.47752	0.324154	0.489249	-2.61013	3	48672455	48672733		1					0
ENSG00000118298	CA14	carbonic anhydrase 14	0.774518	4.2333	-2.48158	0.0543334	1.26493	-2.45041	1	150264691	150264891							1
ENSG00000134363	FST	follistatin	0.798719	4.50259	-2.51394	0.0466547	1.3311	-2.495	5	53485689	53486092							1
ENSG00000268144	NIFKP6	nucleolar protein interacting with the FHA domain of MKI67 pseudogene 6	0.781558	4.50259	-2.51696	0.0755676	1.12166	-2.52633	19	51396755	51397109	1						0
ENSG00000268006	PTOV1-AS1	PTOV1 antisense RNA 1	0.778038	4.50259	-2.51777	0.0539624	1.26791	-2.53284	19	49839227	49840076							1
ENSG00000244242 #or# ENSG00000250644 /// ENSG00000244242	IFITM10	interferon induced transmembrane protein 10 #or# NA /// interferon induced transmembrane protein 10	0.778038	4.50259	-2.51784	0.0576324	1.23933	-2.53284	11	1747930	1748119							1
ENSG00000188107	EYS	eyes shut homolog (Drosophila)	0.778038	4.50259	-2.51863	0.0841656	1.07487	-2.53284	6	65490660	65490707							1
ENSG00000178403	NEUROG2	neurogenin 2	1.20314	6.88854	-2.52609	0.0231235	1.63595	-2.51739	4	112513516	112514656							1
ENSG00000271151	AC016737.1	NA	0.40794	2.65523	-2.54061	0.130451	0.884552	-2.70241	2	173968351	173969418		1					0
ENSG00000227176	AC092641.1	NA	0.390779	2.65523	-2.56064	0.153057	0.815147	-2.76441	2	170077224	170077594		1					0
ENSG00000229589	ACVR2B-AS1	ACVR2B antisense RNA 1	0.390779	2.65523	-2.56854	0.164962	0.782615	-2.76441	3	38451027	38453225							1
ENSG00000269843	AC008537.2	NA	0.40794	2.65523	-2.5718	0.170519	0.768227	-2.70241	19	40831221	40831577		1					0
ENSG00000271819	RNU6-94P	RNA, U6 small nuclear 94, pseudogene	0.390779	2.65523	-2.57419	0.174896	0.757219	-2.76441	15	50347423	50347529	1						0
ENSG00000262319	AC007952.6	NA	0.390779	2.65523	-2.60446	0.2633	0.579549	-2.76441	17	19141017	19143689		1					0
ENSG00000121410	A1BG	alpha-1-B glycoprotein	0.387259	2.65523	-2.60498	0.265659	0.575676	-2.77747	19	58350594	58350651							1
ENSG00000184731	FAM110C	family with sequence similarity 110 member C	0.387259	2.65523	-2.62086	0.365489	0.437125	-2.77747	2	41221	41627							1
ENSG00000161040	FBXL13	F-box and leucine rich repeat protein 13	0.390779	2.57849	-2.63644	0.198837	0.701503	-2.7221	7	103074771	103074811							1
ENSG00000272078	AL139423.1	NA	0.390779	2.57849	-2.63928	0.18501	0.732806	-2.7221	1	10647248	10654333		1					0
ENSG00000129682	FGF13	fibroblast growth factor 13	0.40794	2.57849	-2.65771	0.12337	0.90879	-2.6601	0	138857642	138857679							1
ENSG00000164621	SMAD5-AS1	SMAD5 antisense RNA 1	0.795199	4.96443	-2.66212	0.0646278	1.18958	-2.64224	5	136129507	136129781							1
ENSG00000154655	L3MBTL4	L3MBTL4, histone methyl-lysine binding protein	0.40794	2.92452	-2.68276	0.158475	0.80004	-2.84177	18	6356709	6356807							1
ENSG00000180229	HERC2P3	hect domain and RLD 2 pseudogene 3	0.815881	5.23372	-2.70369	0.0547211	1.26185	-2.68141	15	20462408	20462446	1						0
ENSG00000270030	AC136475.7	NA	0.387259	2.92452	-2.7138	0.207978	0.681982	-2.91683	11	325703	326294		1					0
ENSG00000167680	SEMA6B	semaphorin 6B	1.17234	7.81222	-2.73172	0.0135776	1.86718	-2.73635	19	4545790	4546274							1
ENSG00000233830	EIF4HP1	eukaryotic translation initiation factor 4H pseudogene 1	0.390779	2.84778	-2.74103	0.0944308	1.02489	-2.86541	7	27458163	27458849	1						0
ENSG00000217791	ASS1P9	argininosuccinate synthetase 1 pseudogene 9	0.387259	2.84778	-2.74121	0.0990127	1.00431	-2.87847	5	53859166	53860401	1						0
ENSG00000229241	PNPT1P1	polyribonucleotide nucleotidyltransferase 1 pseudogene 1	0.387259	2.84778	-2.7414	0.10431	0.981675	-2.87847	3	3981981	3984295	1						0
ENSG00000196263	ZNF471	zinc finger protein 471	0.387259	2.84778	-2.74186	0.119915	0.921127	-2.87847	19	56511517	56511571							1
ENSG00000215278	RPS7P6	ribosomal protein S7 pseudogene 6	0.390779	2.84778	-2.74269	0.160618	0.794205	-2.86541	4	17427696	17428274	1						0
ENSG00000267296	CEBPA-DT	CEBPA divergent transcript	1.20314	8.08151	-2.75395	0.0121277	1.91622	-2.74782	19	33302857	33305054							1
ENSG00000261783	AC009054.2	NA	1.1895	8.08151	-2.75646	0.0115247	1.93837	-2.76427	16	75379818	75380134		1					0
ENSG00000149575	SCN2B	sodium voltage-gated channel beta subunit 2	0.795199	5.50301	-2.75733	0.0460216	1.33704	-2.79083	11	118161951	118166886							1
ENSG00000205853	RFPL3S	RFPL3 antisense	0.387259	3.11707	-2.80838	0.0761657	1.11824	-3.00882	22	32362974	32363058							1
ENSG00000109321	AREG	amphiregulin	0.390779	3.11707	-2.8213	0.0932813	1.03021	-2.99577	4	74450380	74450532							1
ENSG00000272888 #or# ENSG00000279765 /// ENSG00000279765	AC013394.1	NA /// long intergenic non-protein coding RNA 1578 #or# NA	0.387259	3.11707	-2.82612	0.101987	0.991455	-3.00882	15	92948952	92949230		1					0
ENSG00000111679	PTPN6	protein tyrosine phosphatase, non-receptor type 6	0.390779	3.11707	-2.83605	0.126284	0.898652	-2.99577	12	6961126	6961316							1
ENSG00000214248	AC010336.1	NA	0.815881	5.69556	-2.83672	0.0416187	1.38071	-2.80341	19	7898804	7903542		1					0
ENSG00000235872	AC078777.1	NA	0.40794	3.11707	-2.8444	0.157399	0.802998	-2.93376	12	67658991	67659584		1					0
ENSG00000282851 /// ENSG00000141971 #or# ENSG00000282851	BISPR	multivesicular body subunit 12A #or# BST2 interferon stimulated positive regulator (non-protein coding) /// BST2 interferon stimulated positive regulator (non-protein coding)	0.390779	3.11707	-2.85004	0.187744	0.726433	-2.99577	19	17414136	17414347							1
ENSG00000208006	MIR16-1	microRNA 16-1	0.778038	6.04159	-2.87713	0.0526875	1.27829	-2.95702	13	50048973	50049061				1			0
ENSG00000122877	EGR2	early growth response 2	0.40794	3.04033	-2.89318	0.102652	0.988632	-2.8978	10	62814433	62814468							1
ENSG00000272516	AL158211.4	NA	0.40794	3.04033	-2.90341	0.0827924	1.08201	-2.8978	10	22332404	22332987		1					0
ENSG00000270574	AC010680.2	NA	0.387259	3.04033	-2.93497	0.0484266	1.31492	-2.97286	2	178578790	178580906		1					0
ENSG00000207605	MIR191	microRNA 191	0.390779	3.38636	-2.94919	0.162091	0.790242	-3.11531	3	49020618	49020709				1			0
ENSG00000279879	AC091152.4	NA	0.390779	3.30962	-2.97093	0.123517	0.908274	-3.08224	17	44689858	44693340		1					0
ENSG00000260326	PHBP21	prohibitin pseudogene 21	0.40794	3.30962	-2.97372	0.0915151	1.03851	-3.02024	16	52934813	52935635	1						0
ENSG00000280286	FRG1KP	FSHD region gene 1 family member K, pseudogene	0.387259	3.30962	-2.97526	0.0793946	1.10021	-3.0953	9	65646982	65647018	1						0
ENSG00000005238	FAM214B	family with sequence similarity 214 member B	0.390779	3.30962	-2.98566	0.039399	1.40451	-3.08224	9	35108345	35108737							1
ENSG00000227514	AC107890.1	NA	0.390779	3.57891	-3.04637	0.0632158	1.19917	-3.1951	8	113377065	113377227		1					0
ENSG00000264644	KRT18P8	keratin 18 pseudogene 8	0.40794	3.57891	-3.05088	0.0769031	1.11406	-3.13309	18	9678248	9679493	1						0
ENSG00000099840	IZUMO4	IZUMO family member 4	0.40794	3.57891	-3.05484	0.0942069	1.02592	-3.13309	19	2099255	2099588							1
ENSG00000199072	MIRLET7F1	microRNA let-7f-1	0.390779	3.57891	-3.05878	0.119597	0.922279	-3.1951	9	94176347	94176433				1			0
ENSG00000064300	NGFR	nerve growth factor receptor	0.390779	3.8482	-3.07756	0.0354164	1.4508	-3.29976	17	49513010	49513372							1
ENSG00000144908	ALDH1L1	aldehyde dehydrogenase 1 family member L1	0.387259	3.8482	-3.08476	0.0379816	1.42043	-3.31281	3	126158598	126158639							1
ENSG00000262904	TMPOP2	thymopoietin pseudogene 2	0.390779	3.8482	-3.10256	0.0468647	1.32915	-3.29976	16	74667506	74668706	1						0
ENSG00000268220	AC008040.5	NA	0.390779	3.8482	-3.11093	0.052927	1.27632	-3.29976	3	170087810	170089590		1					0
ENSG00000166816	LDHD	lactate dehydrogenase D	0.40794	3.8482	-3.11201	0.0538348	1.26894	-3.23775	16	75114526	75114685							1
ENSG00000179292	TMEM151A	transmembrane protein 151A	0.387259	3.8482	-3.11466	0.0562131	1.25016	-3.31281	11	66295654	66296664							1
ENSG00000274536 #or# ENSG00000284567	AL034397.3	NA #or# microRNA 223	0.781558	7.04201	-3.12644	0.0859724	1.06564	-3.17156	0	66018824	66020422		1					0
ENSG00000152208	GRID2	glutamate ionotropic receptor delta type subunit 2	0.40794	3.77146	-3.16998	0.0747874	1.12617	-3.20869	4	93806874	93810157							1
ENSG00000223508	RPL23AP53	ribosomal protein L23a pseudogene 53	0.390779	3.77146	-3.18217	0.0393196	1.40539	-3.2707	8	230008	230170	1						0
ENSG00000189120	SP6	Sp6 transcription factor	0.40794	3.77146	-3.18284	0.038198	1.41796	-3.20869	17	47844914	47847298							1
ENSG00000267787	AC027097.2	NA	0	2.19339	-3.26643	0.187396	0.72724	?	18	57737762	57738044		1					0
ENSG00000261764	KRT18P18	keratin 18 pseudogene 18	0	2.19339	-3.27246	0.204246	0.689846	?	16	72728616	72729894	1						0
ENSG00000159640	ACE	angiotensin I converting enzyme	0.40794	3.96401	-3.28129	0.0535234	1.27146	-3.28053	17	63496798	63496985							1
ENSG00000164342	TLR3	toll like receptor 3	0	2.19339	-3.28693	0.257616	0.589027	?	4	186082320	186082717							1
ENSG00000155749	ALS2CR12	amyotrophic lateral sclerosis 2 chromosome region 12	0	2.11665	-3.28736	0.349201	0.456925	?	2	201351405	201351451							1
ENSG00000149654	CDH22	cadherin 22	0	2.11665	-3.28902	0.309768	0.508963	?	20	46209821	46210560							1
ENSG00000199150	MIRLET7G	microRNA let-7g	0	2.19339	-3.29291	0.287243	0.54175	?	3	52268278	52268361				1			0
ENSG00000229835	KHSRPP1	KH-type splicing regulatory protein pseudogene 1	0	2.11665	-3.29337	0.233252	0.632174	?	9	21695176	21696943	1						0
ENSG00000235555	SUMO1P4	SUMO1 pseudogene 4	0	2.11665	-3.29444	0.21869	0.660172	?	19	49275119	49275420	1						0
ENSG00000130234	ACE2	angiotensin I converting enzyme 2	0	2.19339	-3.29574	0.303398	0.517988	?	0	15594887	15595003							1
ENSG00000229000	SEPT7P8	septin 7 pseudogene 8	0	2.11665	-3.29649	0.194143	0.711877	?	19	53772506	53773280	1						0
ENSG00000274922	AL139384.1	NA	0	2.11665	-3.30597	0.119647	0.922097	?	13	112686769	112689815		1					0
ENSG00000101282	RSPO4	R-spondin 4	0	2.19339	-3.31032	0.419853	0.376903	?	20	960254	960356							1
ENSG00000186481 /// ENSG00000186481 #or# ENSG00000283294	ANKRD20A5P	ankyrin repeat domain 20 family member A5, pseudogene #or# NA /// ankyrin repeat domain 20 family member A5, pseudogene	0	2.11665	-3.31607	0.0777341	1.10939	?	18	14251966	14252140	1						0
ENSG00000200211	RNY4P27	RNA, Ro-associated Y4 pseudogene 27	0	2.19339	-3.3164	0.496157	0.304381	?	13	95336106	95336201	1						0
ENSG00000143850	PLEKHA6	pleckstrin homology domain containing A6	0	2.11665	-3.31713	0.0745788	1.12738	?	1	204273626	204273740							1
ENSG00000165076	PRSS37	serine protease 37	0	2.19339	-3.31858	0.530365	0.275426	?	7	141836359	141836535							1
ENSG00000199094	MIR30C2	microRNA 30c-2	0	2.19339	-3.31858	0.530365	0.275426	?	6	71376960	71377031				1			0
ENSG00000244513	AC109587.1	NA	0	2.11665	-3.32876	0.0491965	1.30807	?	3	69056033	69056241		1					0
ENSG00000196660	SLC30A10	solute carrier family 30 member 10	0.40794	4.2333	-3.35205	0.035608	1.44845	-3.37535	1	219915154	219915448							1
ENSG00000176732	PFN4	profilin family member 4	0	2.38594	-3.41865	0.049401	1.30626	?	2	24122536	24122547							1
ENSG00000165501 #or# ENSG00000258568	RHOQP1	leucine rich repeat protein 1 #or# ras homolog family member Q pseudogene 1	0	2.38594	-3.42089	0.054656	1.26236	?	14	49599994	49600572	1						0
ENSG00000241723	AC074276.1	NA	0	2.38594	-3.42231	0.0584684	1.23308	?	3	158275809	158276421		1					0
ENSG00000225531	AL807761.2	NA	0	2.38594	-3.42516	0.0674452	1.17105	?	9	107116829	107117557		1					0
ENSG00000271964	AC090948.1	NA	0	2.38594	-3.42954	0.0860457	1.06527	?	3	16314439	16314987		1					0
ENSG00000262692	AC116914.2	NA	0	2.38594	-3.43851	0.160157	0.795454	?	17	3722389	3722488		1					0
ENSG00000224888	AC138028.2	NA	0	2.38594	-3.43901	0.166887	0.777577	?	16	88738504	88741425		1					0
ENSG00000232803	SLCO4A1-AS1	SLCO4A1 antisense RNA 1	0	2.3092	-3.44257	0.234278	0.630269	?	20	62663031	62663487							1
ENSG00000279115	AC006386.2	NA	0	2.38594	-3.44776	0.417352	0.379498	?	0	25307729	25307803		1					0
ENSG00000149573	MPZL2	myelin protein zero like 2	0.390779	4.77188	-3.46435	0.0282837	1.54846	-3.61013	11	118262720	118262850							1
ENSG00000237922	AL450309.1	NA	0.390779	4.69514	-3.50379	0.0298653	1.52483	-3.58675	1	236285976	236286276		1					0
ENSG00000149380	P4HA3	prolyl 4-hydroxylase subunit alpha 3	0	2.65523	-3.54724	0.0782518	1.10651	?	11	74285433	74285985							1
ENSG00000224215	AL606469.1	NA	0	2.65523	-3.55553	0.0946895	1.0237	?	10	23344424	23345181		1					0
ENSG00000108309	RUNDC3A	RUN domain containing 3A	0.387259	5.23372	-3.60376	0.0112808	1.94766	-3.75647	17	44318096	44318670							1
ENSG00000225976	CKS1BP2	CDC28 protein kinase regulatory subunit 1B pseudogene 2	0.387259	4.8877	-3.60415	0.018396	1.73528	-3.65778	10	29697935	29698174	1						0
ENSG00000275532	AC006449.2	NA	0	2.57849	-3.6054	0.0592766	1.22712	?	17	38703480	38703757		1					0
ENSG00000171992	SYNPO	synaptopodin	0	2.57849	-3.61336	0.0441643	1.35493	?	5	150650334	150652337							1
ENSG00000249395	CASC9	cancer susceptibility 9 (non-protein coding)	0	2.57849	-3.63199	0.0245193	1.61049	?	8	75223898	75224358							1
ENSG00000228506	AL513550.1	NA	0	2.92452	-3.63876	0.0515361	1.28789	?	6	99430713	99431373		1					0
ENSG00000273472	AC096733.2	NA	0.387259	5.50301	-3.65896	0.0176071	1.75431	-3.82885	4	140756528	140757921		1					0
ENSG00000227361	RPS24P7	ribosomal protein S24 pseudogene 7	0	2.92452	-3.69867	0.14028	0.853005	?	2	61803143	61803388	1						0
ENSG00000273300	AC000068.3	NA	0	2.84778	-3.70319	0.0282522	1.54895	?	22	19454179	19454605		1					0
ENSG00000135835	KIAA1614	KIAA1614	0	2.84778	-3.70345	0.0320664	1.49395	?	1	180950534	180950925							1
ENSG00000156968	MPV17L	MPV17 mitochondrial inner membrane protein like	0	2.84778	-3.70644	0.398001	0.400116	?	16	15407933	15408118							1
ENSG00000283638 #or# ENSG00000284538 /// ENSG00000283638 #or# ENSG00000284043 /// ENSG00000283638 #or# ENSG00000284107 /// ENSG00000283638 #or# ENSG00000284157 /// ENSG00000283638 #or# ENSG00000283931	AC002407.1	NA #or# microRNA 106a /// NA #or# microRNA 19b-2 /// NA #or# microRNA 92a-2 /// NA #or# microRNA 18b /// NA #or# microRNA 20b	0	2.92452	-3.73465	0.439096	0.357441	?	0	134168911	134170352		1					0
ENSG00000277369	AC010654.1	NA	0	3.11707	-3.80378	0.0522656	1.28178	?	16	11797468	11798275		1					0
ENSG00000117600	PLPPR4	phospholipid phosphatase related 4	0.390779	6.15741	-3.86457	0.006548	2.18389	-3.9779	1	99307011	99309590							1
ENSG00000285244	DINOL	damage induced long noncoding RNA	0.390779	6.88854	-4.00971	0.0035294	2.4523	-4.13977	6	36677609	36678559							1
ENSG00000261766	AC133550.2	NA	0	3.8482	-4.12169	0.0907419	1.04219	?	16	28862166	28862530		1					0
ENSG00000166446	CDYL2	chromodomain Y like 2	0	5.42627	-4.65474	0.00353073	2.45214	?	16	80684604	80685129							1
