# Supplementary material for: MLL-AF4 and a murinized pSer-variant thereof are turning on the nucleolar stress pathway
Source: Cell Biosci. 2022 Apr 25;12:47. doi: 10.1186/s13578-022-00781-y (PMC9036721; doi:10.1186/s13578-022-00781-y)
Supplement: Supplementary file 4 — Additional file 4: MA4_A4M gene signature. [file 13578_2022_781_MOESM4_ESM.xlsx]

## Sheet: Sheet1
ID	gene symbol	gene name	mean exp	mean Mock	log2	pvalue	minus log 10	log2 rolf	chrom	Anfang	Ende	PG	NA	LINC	MIR	SNO	MT	ProCodG
ENSG00000224509	AC010884.1	NA	6.75493	0	4.9535	0.00553092	2.2572	?	2	104936241	104936765		1					0
ENSG00000176928	GCNT4	glucosaminyl (N-acetyl) transferase 4, core 2	6.52994	0	4.9183	0.00332379	2.47837	?	5	75025346	75028675							1
ENSG00000143217	NECTIN4	nectin cell adhesion molecule 4	15.8461	0.461841	4.77588	0.00184942	2.73296	5.10059	1	161072140	161072885							1
ENSG00000138119	MYOF	myoferlin	5.12244	0	4.55508	0.0220122	1.65734	?	10	93426071	93426158							1
ENSG00000256849	TCP1P3	t-complex 1 pseudogene 3	4.67247	0	4.4695	0.0126276	1.89868	?	12	19941521	19943018	1						0
ENSG00000182950	ODF3L1	outer dense fiber of sperm tails 3 like 1	4.67247	0	4.45786	0.0567207	1.24626	?	15	75727541	75727688							1
ENSG00000249819	AC112240.1	NA	4.64368	0	4.42116	0.14397	0.841729	?	4	157204462	157204855		1					0
ENSG00000279700	AC131212.2	NA	4.44748	0	4.41311	0.031237	1.50533	?	12	132565071	132566425		1					0
ENSG00000188613	NANOS1	nanos C2HC-type zinc finger 1	870.379	41.7554	4.32749	1.7275e-104	103.763	4.38161	10	119030681	119031533		1					0
ENSG00000119703	ZC2HC1C	zinc finger C2HC-type containing 1C	4.41869	0	4.3042	0.0192895	1.71468	?	14	75077532	75077819							1
ENSG00000270487	AL355297.2	NA	4.19371	0	4.26684	0.0258306	1.58787	?	6	156780327	156780455		1					0
ENSG00000273063	AC007250.1	NA	3.96872	0	4.22158	0.0179617	1.74565	?	2	58241349	58241686		1					0
ENSG00000188316	ENO4	enolase 4	3.96872	0	4.21943	0.0317909	1.4977	?	10	116911573	116911788							1
ENSG00000159450	TCHH	trichohyalin	3.96872	0	4.21859	0.042386	1.37278	?	1	152106317	152107384							1
ENSG00000243759	ST13P15	ST13, Hsp70 interacting protein pseudogene 15	3.74373	0	4.17059	0.0324536	1.48874	?	3	143517123	143518229	1						0
ENSG00000164690	SHH	sonic hedgehog	3.74373	0	4.15912	0.0550262	1.25943	?	7	155806582	155806839							1
ENSG00000267117	AC010525.1	NA	3.74373	0	4.15204	0.0827159	1.08241	?	19	55694118	55694558		1					0
ENSG00000213109	AL365223.1	NA	3.71494	0	4.10379	0.266363	0.574526	?	6	136900378	136901157		1					0
ENSG00000204666	AC010624.1	NA	3.51874	0	4.05853	0.247122	0.607088	?	19	50066075	50066793		1					0
ENSG00000249599	BMPR1B-DT	BMPR1B divergent transcript	3.48996	0	4.00459	0.114179	0.942413	?	4	94743800	94744094							1
ENSG00000105650 #or# ENSG00000285188 /// ENSG00000285188	AC008397.2	NA /// phosphodiesterase 4C #or# NA	3.48996	0	3.98539	0.0558476	1.253	?	19	18207961	18210928		1					0
ENSG00000283709	FAM238C	family with sequence similarity 238 member C (non-protein coding)	3.48996	0	3.97617	0.0435162	1.36135	?	10	26931276	26931562							1
ENSG00000178033	CALHM5	calcium homeostasis modulator family member 5	3.48996	0	3.96645	0.034933	1.45676	?	6	116515990	116524792							1
ENSG00000265100	AC005332.1	NA	3.26497	0	3.92446	0.0778816	1.10857	?	17	68246629	68247938		1					0
ENSG00000010030	ETV7	ETS variant 7	3.26497	0	3.92391	0.071748	1.14419	?	6	36366195	36366644							1
ENSG00000091536	MYO15A	myosin XVA	3.26497	0	3.92365	0.0691705	1.16008	?	17	18178717	18178870							1
ENSG00000236914	LINC01852	long intergenic non-protein coding RNA 1852	3.26497	0	3.92361	0.0686974	1.16306	?	15	38072018	38072959			1				0
ENSG00000111729 #or# ENSG00000284697	AC006511.5	C-type lectin domain family 4 member A #or# NA	3.26497	0	3.92348	0.0675197	1.17057	?	12	8138140	8138548		1					0
ENSG00000232622	AC114482.1	NA	3.26497	0	3.92332	0.0659923	1.18051	?	1	84636158	84636258		1					0
ENSG00000243225	AC007686.1	NA	3.26497	0	3.92302	0.0632967	1.19862	?	14	76968683	76969145		1					0
ENSG00000207110	RNU1-106P	RNA, U1 small nuclear 106, pseudogene	3.26497	0	3.92218	0.0567742	1.24585	?	8	127999131	127999294	1						0
ENSG00000213285	RPL23AP45	ribosomal protein L23a pseudogene 45	3.26497	0	3.92165	0.0531704	1.27433	?	5	181471963	181472430	1						0
ENSG00000154957	ZNF18	zinc finger protein 18	3.26497	0	3.92063	0.0471479	1.32654	?	17	11992830	11992911							1
ENSG00000163075	CFAP221	cilia and flagella associated protein 221	3.26497	0	3.92055	0.0467602	1.33012	?	2	119656362	119656660							1
ENSG00000254481	PTP4A2P2	protein tyrosine phosphatase type IVA, member 2 pseudogene 2	3.26497	0	3.9187	0.0385104	1.41442	?	11	134123828	134124329	1						0
ENSG00000274997	HIST1H2AH	histone cluster 1 H2A family member h	3.03998	0	3.88549	0.0249789	1.60243	?	6	27147513	27147515							1
ENSG00000229037	BX323845.3	NA	3.03998	0	3.86783	0.0450357	1.34644	?	0	53808389	53808623		1					0
ENSG00000263843	AC022211.2	NA	3.03998	0	3.8656	0.0492954	1.30719	?	17	75273412	75273722		1					0
ENSG00000278576	AL162171.3	NA	3.03998	0	3.8617	0.058361	1.23388	?	14	88589231	88592408		1					0
ENSG00000231700	AL356276.2	NA	3.03998	0	3.85677	0.0739844	1.13086	?	1	157709086	157709643		1					0
ENSG00000165182	CXorf58	chromosome X open reading frame 58	3.03998	0	3.853	0.0905866	1.04294	?	0	23916365	23916501							1
ENSG00000280832	GSEC	G-quadruplex forming sequence containing lncRNA	8.6124	0.73113	3.83294	0.0118561	1.92606	3.55821	11	126350172	126351777							1
ENSG00000060140	STYK1	serine/threonine/tyrosine kinase 1	2.815	0	3.80838	0.0555136	1.2556	?	12	10634619	10634686							1
ENSG00000228140	AL031283.1	NA	2.815	0	3.77936	0.0984662	1.00671	?	1	15402979	15407907		1					0
ENSG00000232482	AL357134.1	NA	2.815	0	3.76505	0.138511	0.858516	?	1	23412102	23412146		1					0
ENSG00000143502	SUSD4	sushi domain containing 4	7.23369	0.461841	3.6616	0.0189674	1.72199	3.96926	1	223358825	223359121							1
ENSG00000225934	AL592310.1	NA	2.78621	0	3.65885	0.168502	0.773394	?	1	227598424	227599094		1					0
ENSG00000182257	PRR34	proline rich 34	2.78621	0	3.65272	0.149385	0.825694	?	22	46049478	46051826							1
ENSG00000259696	AC104759.1	NA	2.78621	0	3.64688	0.134449	0.871444	?	15	31453201	31454139		1					0
ENSG00000173110	HSPA6	heat shock protein family A (Hsp70) member 6	2.78621	0	3.6305	0.104085	0.982612	?	1	161526591	161526910							1
ENSG00000229927 /// ENSG00000165874 #or# ENSG00000229927	RHEBP1	RHEB pseudogene 1 /// family with sequence similarity 35 member B, pseudogene #or# RHEB pseudogene 1	2.78621	0	3.62878	0.101599	0.993112	?	10	46634911	46635466	1						0
ENSG00000132031	MATN3	matrilin 3	7.2049	0.461841	3.60857	0.0359444	1.44437	3.96351	2	19994337	19994409							1
ENSG00000229419	RALGAPA1P1	Ral GTPase activating protein catalytic alpha subunit 1 pseudogene 1	2.78621	0	3.59603	0.0695545	1.15767	?	9	105520128	105526359	1						0
ENSG00000039987	BEST2	bestrophin 2	2.56122	0	3.57618	0.422549	0.374123	?	19	12756300	12756706							1
ENSG00000267369	AC015911.7	NA	2.56122	0	3.57452	0.373308	0.427933	?	17	35498218	35499175		1					0
ENSG00000283463	HSFX4	heat shock transcription factor family, X-linked member 4	2.56122	0	3.56723	0.240186	0.619452	?	0	149931106	149931287							1
ENSG00000134323	MYCN	MYCN proto-oncogene, bHLH transcription factor	2.56122	0	3.5665	0.231305	0.635814	?	2	15946098	15947007							1
ENSG00000143512	HHIPL2	HHIP like 2	2.56122	0	3.56335	0.198446	0.702358	?	1	222538729	222538774							1
ENSG00000178146	AL672207.1	NA	2.56122	0	3.56262	0.1919	0.716926	?	0	101778969	101780538		1					0
ENSG00000172752	COL6A5	collagen type VI alpha 5 chain	2.56122	0	3.56131	0.181072	0.742149	?	3	130476891	130477338							1
ENSG00000196421	C20orf204	chromosome 20 open reading frame 204	2.56122	0	3.5603	0.17333	0.761126	?	20	64038622	64039778							1
ENSG00000205403	CFI	complement factor I	2.56122	0	3.55834	0.159837	0.796323	?	4	109766775	109766824							1
ENSG00000177173	NAP1L4P1	nucleosome assembly protein 1 like 4 pseudogene 1	2.56122	0	3.55816	0.158721	0.799365	?	1	116532936	116534092	1						0
ENSG00000270052	BX546450.2	NA	2.56122	0	3.55641	0.148206	0.829133	?	0	151497985	151498354		1					0
ENSG00000280441	FP236383.1	NA	92.4342	7.54293	3.55582	1.53266e-14	13.8146	3.61523	21	8410179	8410645		1					0
ENSG00000200370	RNA5S17	RNA, 5S ribosomal 17	2.56122	0	3.55537	0.142517	0.846135	?	1	228646040	228646158							1
ENSG00000111788	AC009533.1	NA	2.56122	0	3.55501	0.140633	0.851914	?	12	9313105	9313241		1					0
ENSG00000233131	AC096649.2	NA	2.56122	0	3.55434	0.137175	0.862726	?	2	175184215	175184607		1					0
ENSG00000226453	LINC02542	long intergenic non-protein coding RNA 2542	2.56122	0	3.55054	0.120183	0.920157	?	6	81845185	81845909			1				0
ENSG00000266921	AC006213.1	NA	2.56122	0	3.5504	0.119637	0.922133	?	19	43996899	43997795		1					0
ENSG00000233554	B4GALT1-AS1	B4GALT1 antisense RNA 1	2.56122	0	3.54318	0.0958937	1.01821	?	9	33179325	33179983							1
ENSG00000277007	AC096642.1	NA	2.56122	0	3.54204	0.0928733	1.03211	?	1	219270774	219273387		1					0
ENSG00000242294	STAG3L5P	stromal antigen 3-like 5 pseudogene	2.56122	0	3.53984	0.0874868	1.05806	?	7	100338772	100338886	1						0
ENSG00000279457	FO538757.1	NA	2.56122	0	3.53936	0.0863894	1.06354	?	1	185217	185350		1					0
ENSG00000258334	AC125611.4	NA	2.56122	0	3.53764	0.0826432	1.08279	?	12	49292631	49293896		1					0
ENSG00000214562	NUTM2D	NUT family member 2D	2.56122	0	3.53567	0.0786841	1.10411	?	10	87365932	87366491							1
ENSG00000260743	AC007823.1	NA	2.56122	0	3.53509	0.0775897	1.1102	?	3	179340322	179341887		1					0
ENSG00000176463	SLCO3A1	solute carrier organic anion transporter family member 3A1	2.56122	0	3.53096	0.070472	1.15198	?	15	92170872	92172435							1
ENSG00000128564	VGF	VGF nerve growth factor inducible	37.5471	3.04033	3.478	1.80803e-06	5.74279	3.6264	7	101162516	101162995							1
ENSG00000260014	LSM3P5	LSM3 homolog, U6 small nuclear RNA and mRNA degradation associated pseudogene 5	2.33623	0	3.47786	0.0603235	1.21951	?	16	78355529	78355834	1						0
ENSG00000105877	DNAH11	dynein axonemal heavy chain 11	2.33623	0	3.47571	0.0671847	1.17273	?	7	21901007	21901116							1
ENSG00000182791	CCDC87	coiled-coil domain containing 87	2.33623	0	3.47568	0.0672935	1.17203	?	11	66590176	66590465							1
ENSG00000260259	LINC02166	long intergenic non-protein coding RNA 2166	6.52994	0.73113	3.47533	0.0277986	1.55598	3.15887	16	89682620	89682842			1				0
ENSG00000254676	AP000873.4	NA	2.33623	0	3.47437	0.0721244	1.14192	?	11	83184082	83184520		1					0
ENSG00000279623	AL359697.1	NA	2.33623	0	3.4729	0.0782082	1.10675	?	10	21865335	21865921		1					0
ENSG00000229299	AL121845.1	NA	2.33623	0	3.46973	0.09451	1.02452	?	20	63745823	63745958		1					0
ENSG00000255655	AC007570.1	NA	2.33623	0	3.4695	0.0958943	1.01821	?	12	109445410	109445581		1					0
ENSG00000260088	AL445483.1	NA	2.33623	0	3.46882	0.100175	0.999242	?	1	200693753	200694250		1					0
ENSG00000119922	IFIT2	interferon induced protein with tetratricopeptide repeats 2	2.33623	0	3.46842	0.102817	0.987934	?	10	89307412	89308919							1
ENSG00000237154	MCFD2P1	multiple coagulation factor deficiency 2 pseudogene 1	2.33623	0	3.46746	0.109574	0.960294	?	6	27407697	27407996	1						0
ENSG00000224186	C5orf66	chromosome 5 open reading frame 66	2.33623	0	3.46457	0.134981	0.869726	?	5	135355049	135355564							1
ENSG00000280157	AL359510.2	NA	2.33623	0	3.4642	0.138846	0.857466	?	1	228121523	228123771		1					0
ENSG00000161180	CCDC116	coiled-coil domain containing 116	2.33623	0	3.46419	0.139022	0.856917	?	22	21637071	21637327							1
ENSG00000118785	SPP1	secreted phosphoprotein 1	2.33623	0	3.46105	0.180323	0.743949	?	4	87980046	87980188							1
ENSG00000133962 /// ENSG00000133962 #or# ENSG00000165929	CATSPERB	cation channel sperm associated auxiliary subunit beta /// cation channel sperm associated auxiliary subunit beta #or# tandem C2 domains, nuclear	2.33623	0	3.46074	0.185489	0.731682	?	14	91778975	91779070							1
ENSG00000225706	PTPRD-AS1	PTPRD antisense RNA 1	2.33623	0	3.46016	0.195602	0.708627	?	9	8859956	8861724							1
ENSG00000242094	FOXP1-IT1	FOXP1 intronic transcript 1	2.33623	0	3.45934	0.211381	0.674933	?	3	71570255	71572830							1
ENSG00000180233 #or# ENSG00000281593 /// ENSG00000281593	AC006978.2	NA /// zinc and ring finger 2 #or# NA	2.33623	0	3.45909	0.216675	0.664191	?	7	30412331	30412502		1					0
ENSG00000255310	AF131215.5	NA	2.33623	0	3.45906	0.2173	0.66294	?	8	11107788	11109726		1					0
ENSG00000272754	AL133245.1	NA	2.33623	0	3.45877	0.223561	0.650603	?	2	32321638	32323002		1					0
ENSG00000259626	MTND3P12	mitochondrially encoded NADH:ubiquinone oxidoreductase core subunit 3 pseudogene 12	2.33623	0	3.45856	0.228458	0.641194	?	15	58150635	58150962	1						0
ENSG00000223336	RNU2-6P	RNA, U2 small nuclear 6, pseudogene	2.33623	0	3.45794	0.243508	0.613487	?	13	46374401	46374590	1						0
ENSG00000206888	RNU6-48P	RNA, U6 small nuclear 48, pseudogene	2.33623	0	3.45789	0.244733	0.611307	?	1	27325219	27325325	1						0
ENSG00000249860	MTRNR2L5	MT-RNR2 like 5	2.33623	0	3.45764	0.25122	0.599946	?	10	55599975	55600041							1
ENSG00000254208	AC011773.1	NA	2.33623	0	3.45722	0.262901	0.580208	?	8	85177522	85177798		1					0
ENSG00000281404	LINC01176	long intergenic non-protein coding RNA 1176	6.07996	0.461841	3.45589	0.0367066	1.43526	3.7186	7	30412331	30412375			1				0
ENSG00000230651	RGPD4-AS1	RGPD4 antisense RNA 1 (head to head)	2.33623	0	3.45581	0.309152	0.509828	?	2	107825885	107826126							1
ENSG00000225032	AL162586.1	NA	2.33623	0	3.45572	0.312313	0.50541	?	9	127821290	127821431		1					0
ENSG00000258711	AL358334.2	NA	2.33623	0	3.45505	0.339541	0.469107	?	14	50956259	50960615		1					0
ENSG00000196611	MMP1	matrix metallopeptidase 1	2.33623	0	3.4543	0.374844	0.426149	?	11	102789920	102790411							1
ENSG00000169427	KCNK9	potassium two pore domain channel subfamily K member 9	6.52994	0.73113	3.45246	0.0551933	1.25811	3.15887	8	139618006	139618257							1
ENSG00000272767	JMJD1C-AS1	JMJD1C antisense RNA 1	6.30495	0.73113	3.45153	0.0303483	1.51787	3.10829	10	63465229	63466563							1
ENSG00000116329	OPRD1	opioid receptor delta 1	6.07996	0.73113	3.43238	0.0300935	1.52153	3.05586	1	28812142	28812383							1
ENSG00000171885	AQP4	aquaporin 4	2.11125	0	3.41934	0.0789968	1.10239	?	18	26861254	26861295							1
ENSG00000275485	AL512652.1	NA	2.11125	0	3.40125	0.10073	0.996842	?	13	20768876	20769375		1					0
ENSG00000205041	AC118344.1	NA	2.11125	0	3.37836	0.141956	0.847847	?	19	40273489	40273630		1					0
ENSG00000278996	FP671120.1	NA	92.6592	8.19732	3.37823	7.7327e-14	13.1117	3.49871	21	8227180	8227646		1					0
ENSG00000102104	RS1	retinoschisin 1	2.11125	0	3.37217	0.157016	0.804057	?	0	18641924	18642156							1
ENSG00000251306	NDUFB4P2	NADH:ubiquinone oxidoreductase subunit B4 pseudogene 2	2.11125	0	3.36701	0.17134	0.766142	?	5	59528861	59529251	1						0
ENSG00000165168	CYBB	cytochrome b-245 beta chain	2.11125	0	3.3553	0.21136	0.674977	?	0	37803877	37804079							1
ENSG00000176945 #or# ENSG00000242086 /// ENSG00000176945	MUC20	mucin 20, cell surface associated #or# MUC20 overlapping transcript /// mucin 20, cell surface associated	2.11125	0	3.33478	0.322054	0.492071	?	3	195740988	195741123							1
ENSG00000185681	MORN5	MORN repeat containing 5	2.11125	0	3.32929	0.366287	0.436178	?	9	122174496	122174754							1
ENSG00000173715	C11orf80	chromosome 11 open reading frame 80	2.11125	0	3.32532	0.404632	0.39294	?	11	66828716	66828797							1
ENSG00000268140	PCGF7P	polycomb group ring finger 7 pseudogene	5.82619	0.461841	3.32449	0.0404334	1.39326	3.65709	19	22137931	22138981	1						0
ENSG00000243753	HLA-L	major histocompatibility complex, class I, L (pseudogene)	5.37622	0.461841	3.27407	0.0433429	1.36308	3.54112	6	30261587	30261703	1						0
ENSG00000083828	ZNF586	zinc finger protein 586	5.6012	0.73113	3.26821	0.0421154	1.37556	2.93754	19	57779348	57780544							1
ENSG00000173231	TERF1P1	telomeric repeat binding factor 1 pseudogene 1	5.6012	0.73113	3.24292	0.0701717	1.15384	2.93754	21	13776086	13777266	1						0
ENSG00000197588	KLKP1	kallikrein pseudogene 1	5.37622	0.73113	3.20815	0.0714868	1.14577	2.87839	19	50887866	50888268	1						0
ENSG00000159176	CSRP1	cysteine and glycine rich protein 1	5.12244	0.461841	3.15552	0.0975634	1.01071	3.47136	1	201495599	201496304							1
ENSG00000111846	GCNT2	glucosaminyl (N-acetyl) transferase 2 (I blood group)	5.12244	0.461841	3.12694	0.0647866	1.18851	3.47136	6	10626608	10629368							1
ENSG00000237512	UNC5B-AS1	UNC5B antisense RNA 1	4.89745	0.461841	3.09862	0.0752275	1.12362	3.40656	10	71217224	71217635							1
ENSG00000188295	ZNF669	zinc finger protein 669	4.89745	0.461841	3.09721	0.0727147	1.13838	3.40656	1	247104200	247104365							1
ENSG00000038945	MSR1	macrophage scavenger receptor 1	5.12244	0.73113	3.08022	0.0819744	1.08632	2.80863	8	16467764	16468036							1
ENSG00000233057	EEF1A1P14	eukaryotic translation elongation factor 1 alpha 1 pseudogene 14	4.44748	0.461841	3.02879	0.076019	1.11908	3.26752	1	194188967	194190342	1						0
ENSG00000232388 #or# ENSG00000284776	AL121900.2	small integral membrane protein 26 #or# NA	4.44748	0.73113	3.01231	0.0606207	1.21738	2.60479	20	18567453	18567478		1					0
ENSG00000272008	AL139274.2	NA	4.67247	0.73113	3.01184	0.0804703	1.09436	2.67598	6	87151159	87155285		1					0
ENSG00000172350	ABCG4	ATP binding cassette subfamily G member 4	4.67247	0.73113	3.00891	0.0836204	1.07769	2.67598	11	119158234	119158495							1
ENSG00000233621	LINC01137	long intergenic non-protein coding RNA 1137	4.44748	0.73113	2.94452	0.114005	0.943076	2.60479	1	37454879	37455912			1				0
ENSG00000175793	SFN	stratifin	4.41869	0.461841	2.91808	0.12317	0.909496	3.25815	1	26863960	26864457							1
ENSG00000219163	HMGB1P20	high mobility group box 1 pseudogene 20	4.41869	0.461841	2.91796	0.123029	0.909993	3.25815	6	53235621	53236297	1						0
ENSG00000280369	AC012640.5	NA	4.19371	0.461841	2.87213	0.135826	0.867016	3.18276	5	10342813	10343131		1					0
ENSG00000280353	AC011466.4	NA	4.19371	0.461841	2.82978	0.0791384	1.10161	3.18276	19	48198107	48199720		1					0
ENSG00000272574	AL596325.2	NA	3.96872	0.461841	2.82613	0.168317	0.773872	3.10321	1	162593659	162593754		1					0
ENSG00000186326	RGS9BP	regulator of G protein signaling 9 binding protein	3.96872	0.461841	2.81684	0.120901	0.917569	3.10321	19	32676972	32678300							1
ENSG00000284862 /// as__ENSG00000145075 /// ENSG00000145075 /// ENSG00000145075 #or# ENSG00000284862	CCDC39	coiled-coil domain containing 39 #or# coiled-coil domain containing 39 /// coiled-coil domain containing 39	3.96872	0.461841	2.81322	0.105066	0.978536	3.10321	3	180614588	180614920							1
ENSG00000196189	SEMA4A	semaphorin 4A	4.19371	0.73113	2.805	0.0968087	1.01409	2.52003	1	156176405	156176656							1
ENSG00000245482	AC046130.1	NA	3.96872	0.73113	2.77602	0.0950312	1.02213	2.44047	12	34022281	34024134		1					0
ENSG00000222017	AC011997.1	NA	4.19371	0.73113	2.77527	0.175815	0.754944	2.52003	2	197774016	197774823		1					0
ENSG00000215246	AC116351.1	NA	3.74373	0.461841	2.77468	0.116849	0.932375	3.01901	5	987180	990623		1					0
ENSG00000227617	CERS6-AS1	CERS6 antisense RNA 1	3.96872	0.73113	2.77295	0.0992397	1.00331	2.44047	2	168783139	168783471							1
ENSG00000182747	SLC35D3	solute carrier family 35 member D3	3.74373	0.73113	2.75118	0.0950222	1.02217	2.35628	6	136924697	136925639							1
ENSG00000264940	SNORD3C	small nucleolar RNA, C/D box 3C	3.74373	0.73113	2.74028	0.1041	0.982551	2.35628	17	19190029	19190245					1		0
ENSG00000274667	AC090517.2	NA	3.74373	0.73113	2.72154	0.121817	0.914291	2.35628	15	56729932	56730611		1					0
ENSG00000259456	ADNP-AS1	ADNP antisense RNA 1	3.96872	0.73113	2.71164	0.198428	0.702396	2.44047	20	50944357	50944717							1
ENSG00000259469	AC084757.2	NA	3.74373	0.73113	2.69642	0.149741	0.824659	2.35628	15	48729080	48729186		1					0
ENSG00000204389	HSPA1A	heat shock protein family A (Hsp70) member 1A	7.68366	1.19297	2.69624	0.0293593	1.53225	2.68724	6	31817683	31817946							1
ENSG00000178301	AQP11	aquaporin 11	7.45867	1.19297	2.67892	0.0274899	1.56083	2.64436	11	77609378	77610355							1
ENSG00000100362	PVALB	parvalbumin	6.78371	0.923681	2.67677	0.0501473	1.29975	2.87661	22	36817006	36817012							1
ENSG00000176678	FOXL1	forkhead box L1	3.71494	0.461841	2.6531	0.190846	0.719317	3.00787	16	86579762	86582160							1
ENSG00000152377	SPOCK1	SPARC (osteonectin), cwcv and kazal like domains proteoglycan 1	7.0087	1.19297	2.63505	0.048612	1.31326	2.55459	5	137267015	137267055							1
ENSG00000276508	AC243830.3	NA	3.48996	0.461841	2.63122	0.312253	0.505494	2.91774	17	36684754	36685129		1					0
ENSG00000180089	TMEM86B	transmembrane protein 86B	3.71494	0.461841	2.59588	0.142796	0.845284	3.00787	19	55226751	55228784							1
ENSG00000272054	AC007390.2	NA	3.48996	0.461841	2.58703	0.194887	0.710217	2.91774	2	37208875	37212677		1					0
ENSG00000183246	RIMBP3C	RIMS binding protein 3C	3.71494	0.461841	2.57996	0.134674	0.870717	3.00787	22	21545678	21546056							1
ENSG00000238137	ARPC3P2	actin related protein 2/3 complex subunit 3 pseudogene 2	3.48996	0.461841	2.57834	0.18112	0.742035	2.91774	1	211442274	211442806	1						0
ENSG00000197301	AC090673.1	NA	3.48996	0.461841	2.57529	0.176755	0.752628	2.91774	12	65873812	65874189		1					0
ENSG00000267248	AC025048.2	NA	3.48996	0.461841	2.55968	0.157559	0.802556	2.91774	17	60134622	60135644		1					0
ENSG00000134853	PDGFRA	platelet derived growth factor receptor alpha	3.48996	0.461841	2.55783	0.155584	0.808035	2.91774	4	54281581	54281977							1
ENSG00000141505	ASGR1	asialoglycoprotein receptor 1	9.56992	1.38552	2.5512	0.0242048	1.6161	2.78808	17	7178564	7178899							1
ENSG00000269929	AL158152.1	NA	3.26497	0.461841	2.54707	0.299244	0.523974	2.8216	9	94176458	94177892		1					0
ENSG00000275557	AC242842.1	NA	3.26497	0.461841	2.54342	0.279263	0.553987	2.8216	1	149612364	149612402		1					0
ENSG00000074527	NTN4	netrin 4	3.48996	0.461841	2.53749	0.137297	0.862338	2.91774	12	95787413	95787468							1
ENSG00000231137	RBM22P5	RNA binding motif protein 22 pseudogene 5	3.26497	0.461841	2.53424	0.236318	0.626504	2.8216	9	76286494	76287449	1						0
ENSG00000233901	LINC01503	long intergenic non-protein coding RNA 1503	3.26497	0.461841	2.53181	0.226406	0.645112	2.8216	9	129359336	129359538			1				0
ENSG00000132437	DDC	dopa decarboxylase	3.26497	0.461841	2.53098	0.223188	0.651329	2.8216	7	50544086	50544113							1
ENSG00000100867	DHRS2	dehydrogenase/reductase 2	6.30495	0.923681	2.53076	0.0548895	1.26051	2.77102	14	23643045	23645639							1
ENSG00000088002	SULT2B1	sulfotransferase family 2B member 1	10.0487	1.9241	2.52907	0.0338302	1.4707	2.38475	19	48599135	48599423							1
ENSG00000249483	AC026726.1	NA	3.26497	0.461841	2.52467	0.200487	0.697914	2.8216	5	81851601	81852201		1					0
ENSG00000275450	AL845472.1	NA	3.26497	0.461841	2.52437	0.199492	0.700074	2.8216	9	41280259	41282846		1					0
ENSG00000272417	AC034229.4	NA	3.26497	0.461841	2.52258	0.193685	0.712905	2.8216	5	10203600	10204040		1					0
ENSG00000124466	LYPD3	LY6/PLAUR domain containing 3	3.26497	0.461841	2.52147	0.190198	0.720794	2.8216	19	43464005	43464456							1
ENSG00000109927	TECTA	tectorin alpha	3.26497	0.461841	2.52088	0.18836	0.725011	2.8216	11	121190706	121191339							1
ENSG00000260464	AL049796.1	NA	3.26497	0.461841	2.52085	0.188276	0.725204	2.8216	1	93847174	93848939		1					0
ENSG00000282386	AL358472.4	NA	3.26497	0.461841	2.51966	0.184673	0.733596	2.8216	1	153964361	153965070		1					0
ENSG00000013364	MVP	major vault protein	3.26497	0.461841	2.51708	0.177195	0.751547	2.8216	16	29841596	29841790							1
ENSG00000271396	AC091167.4	NA	3.26497	0.461841	2.51638	0.175271	0.756291	2.8216	15	90284376	90284646		1					0
ENSG00000259066 /// ENSG00000012963 #or# ENSG00000259066 /// ENSG00000153485 #or# ENSG00000259066	AL110118.2	ubiquitin protein ligase E3 component n-recognin 7 (putative) #or# NA /// NA /// transmembrane protein 251 #or# NA	3.26497	0.461841	2.51488	0.17117	0.766572	2.8216	14	93186260	93186275		1					0
ENSG00000162992	NEUROD1	neuronal differentiation 1	3.26497	0.461841	2.51341	0.167319	0.776454	2.8216	2	181676467	181677789							1
ENSG00000161509	GRIN2C	glutamate ionotropic receptor NMDA type subunit 2C	3.26497	0.461841	2.51022	0.15936	0.797622	2.8216	17	74853517	74855107							1
ENSG00000250770	AC005865.2	NA	3.26497	0.461841	2.50745	0.152895	0.815608	2.8216	12	3298696	3300441		1					0
ENSG00000123407	HOXC12	homeobox C12	3.26497	0.461841	2.50447	0.146379	0.834521	2.8216	12	53956567	53958956							1
ENSG00000136960	ENPP2	ectonucleotide pyrophosphatase/phosphodiesterase 2	3.48996	0.73113	2.50179	0.146847	0.833134	2.25501	8	119616269	119616384							1
ENSG00000138378	STAT4	signal transducer and activator of transcription 4	6.52994	1.19297	2.49962	0.0610179	1.21454	2.45251	2	191148204	191148204							1
ENSG00000139178	C1RL	complement C1r subcomponent like	3.48996	0.73113	2.49883	0.190828	0.719357	2.25501	12	7108145	7108479							1
ENSG00000198075	SULT1C4	sulfotransferase family 1C member 4	3.48996	0.73113	2.497	0.199635	0.699764	2.25501	2	108387433	108387640							1
ENSG00000245534	RORA-AS1	RORA antisense RNA 1	3.48996	0.73113	2.4934	0.214372	0.668833	2.25501	15	60547718	60547964							1
ENSG00000213212	NCLP1	nucleolin pseudogene 1	3.48996	0.73113	2.48931	0.228974	0.640213	2.25501	9	136812788	136813625	1						0
ENSG00000224557	HLA-DPB2	major histocompatibility complex, class II, DP beta 2 (pseudogene)	3.03998	0.461841	2.46921	0.337468	0.471767	2.7186	6	33129065	33129084	1						0
ENSG00000215158	AC138409.2	NA	3.03998	0.461841	2.46865	0.152341	0.817184	2.7186	5	34199797	34200921		1					0
ENSG00000243429	OR7E29P	olfactory receptor family 7 subfamily E member 29 pseudogene	3.03998	0.461841	2.46845	0.320027	0.494814	2.7186	3	125712139	125713045	1						0
ENSG00000207264	RNU6-15P	RNA, U6 small nuclear 15, pseudogene	3.03998	0.461841	2.46663	0.173077	0.761761	2.7186	10	21321961	21322067	1						0
ENSG00000118407	FILIP1	filamin A interacting protein 1	3.03998	0.461841	2.466	0.184754	0.733407	2.7186	6	75308092	75308690							1
ENSG00000224903	AC005534.1	NA	3.03998	0.461841	2.46595	0.251373	0.599682	2.7186	7	156654185	156654687		1					0
ENSG00000264365	AC023983.1	NA	3.03998	0.461841	2.46576	0.243787	0.612989	2.7186	18	24367503	24367984		1					0
ENSG00000227564	LINC00376	long intergenic non-protein coding RNA 376	3.03998	0.461841	2.46547	0.225565	0.646727	2.7186	13	63183101	63183328			1				0
ENSG00000283122	HYMAI	hydatidiform mole associated and imprinted (non-protein coding)	3.03998	0.461841	2.46545	0.207873	0.682202	2.7186	6	144004916	144008262							1
ENSG00000267249	AP005482.3	NA	3.26497	0.73113	2.46122	0.16055	0.79439	2.15887	18	12670426	12671145		1					0
ENSG00000118690	ARMC2	armadillo repeat containing 2	3.26497	0.73113	2.46103	0.160988	0.793207	2.15887	6	108964980	108965117							1
ENSG00000226080	AC062028.2	NA	6.27616	0.923681	2.45596	0.0842102	1.07464	2.76442	2	11102142	11102997		1					0
ENSG00000171532	NEUROD2	neuronal differentiation 2	3.26497	0.73113	2.45366	0.177981	0.749627	2.15887	17	39604780	39605450							1
ENSG00000262691	AC040160.1	NA	3.26497	0.73113	2.44619	0.194709	0.710614	2.15887	16	67261108	67263784		1					0
ENSG00000271732	AL137798.1	NA	6.07996	1.19297	2.43892	0.0867293	1.06183	2.3495	1	16617391	16617729		1					0
ENSG00000246308	AC116535.1	NA	3.26497	0.73113	2.43656	0.215875	0.665797	2.15887	11	10820732	10822931		1					0
ENSG00000136404	TM6SF1	transmembrane 6 superfamily member 1	3.26497	0.73113	2.43653	0.215941	0.665664	2.15887	15	83144540	83144854							1
ENSG00000142303	ADAMTS10	ADAM metallopeptidase with thrombospondin type 1 motif 10	5.82619	0.923681	2.43565	0.129324	0.88832	2.65709	19	8604936	8605358							1
ENSG00000147883	CDKN2B	cyclin dependent kinase inhibitor 2B	186.611	34.6352	2.42395	4.7849e-22	21.3201	2.42972	9	22005987	22006247							1
ENSG00000187601	MAGEH1	MAGE family member H1	3.03998	0.73113	2.42334	0.16501	0.78249	2.05586	0	55453035	55453566							1
ENSG00000135917	SLC19A3	solute carrier family 19 member 3	3.03998	0.73113	2.42153	0.167221	0.776708	2.05586	2	227701607	227702320							1
ENSG00000151651	ADAM8	ADAM metallopeptidase domain 8	2.815	0.461841	2.41958	0.186032	0.730412	2.60767	10	133273305	133273430							1
ENSG00000275769	AC068792.1	NA	3.03998	0.73113	2.41725	0.172516	0.763172	2.05586	12	31443792	31444208		1					0
ENSG00000175061 #or# ENSG00000277512	SNORD65	LRRC75A antisense RNA 1 #or# small nucleolar RNA, C/D box 65	6.05118	0.923681	2.4137	0.0814415	1.08915	2.71175	17	16441226	16441298					1		0
ENSG00000103196	CRISPLD2	cysteine rich secretory protein LCCL domain containing 2	3.03998	0.73113	2.41317	0.1777	0.750312	2.05586	16	84920397	84920768							1
ENSG00000260576	EIF5A2P1	eukaryotic translation initiation factor 5A2 pseudogene 1	2.815	0.461841	2.41133	0.207377	0.683239	2.60767	15	72041194	72041653	1						0
ENSG00000278879	AP000560.1	NA	3.03998	0.73113	2.41076	0.180804	0.742792	2.05586	11	74830574	74832510		1					0
ENSG00000168283 #or# ENSG00000269897	COMMD3-BMI1	BMI1 proto-oncogene, polycomb ring finger #or# COMMD3-BMI1 readthrough	2.815	0.461841	2.40899	0.214545	0.668481	2.60767	10	22326431	22326521							1
ENSG00000272744	AC107214.2	NA	6.30495	1.46226	2.40802	0.0704466	1.15214	2.10829	4	183516894	183517527		1					0
ENSG00000271687	MTND5P10	mitochondrially encoded NADH:ubiquinone oxidoreductase core subunit 5 pseudogene 10	2.815	0.461841	2.40093	0.244447	0.611816	2.60767	5	100046977	100048785	1						0
ENSG00000276509	AC239799.2	NA	3.03998	0.73113	2.39267	0.205308	0.687595	2.05586	1	146235806	146237807		1					0
ENSG00000102924	CBLN1	cerebellin 1 precursor	5.82619	0.923681	2.39178	0.0893567	1.04887	2.65709	16	49279312	49279403							1
ENSG00000174004	NRROS	negative regulator of reactive oxygen species	3.03998	0.73113	2.38555	0.215475	0.666603	2.05586	3	196654527	196654993							1
ENSG00000095587	TLL2	tolloid like 2	11.6812	2.38594	2.37821	0.0106849	1.97123	2.29155	10	96395193	96395382							1
ENSG00000144045	DQX1	DEAQ-box RNA dependent ATPase 1	3.03998	0.73113	2.35562	0.261004	0.583353	2.05586	2	74524267	74524307							1
ENSG00000137449	CPEB2	cytoplasmic polyadenylation element binding protein 2	124.576	23.8985	2.35349	3.32954e-15	14.4776	2.38204	4	15063741	15063871							1
ENSG00000169129	AFAP1L2	actin filament associated protein 1 like 2	5.6012	0.923681	2.34919	0.0796417	1.09886	2.60027	10	114323177	114323261							1
ENSG00000019102	VSIG2	V-set and immunoglobulin domain containing 2	3.03998	0.73113	2.34709	0.274666	0.561195	2.05586	11	124748106	124748385							1
ENSG00000197714	ZNF460	zinc finger protein 460	5.82619	1.19297	2.31931	0.100404	0.998249	2.28799	19	57284551	57284643							1
ENSG00000154856	APCDD1	APC down-regulated 1	5.15123	0.923681	2.30082	0.0749824	1.12504	2.47945	18	10487590	10487814							1
ENSG00000143450 #or# ENSG00000232937 /// ENSG00000143450	OAZ3	ornithine decarboxylase antizyme 3 #or# NA /// ornithine decarboxylase antizyme 3	6.05118	1.46226	2.29616	0.0677636	1.169	2.04902	1	151771220	151771330							1
ENSG00000164379	FOXQ1	forkhead box Q1	13.9886	2.84778	2.28401	0.0105908	1.97507	2.29634	6	1313917	1314748							1
ENSG00000179909	ZNF154	zinc finger protein 154	2.78621	0.461841	2.27527	0.366187	0.436297	2.59284	19	57697367	57697841							1
ENSG00000276334	AL133243.2	NA	5.37622	1.19297	2.26305	0.102162	0.99071	2.17203	2	32521927	32523547		1					0
ENSG00000213199	ASIC3	acid sensing ion channel subunit 3	5.37622	1.19297	2.26055	0.107349	0.969201	2.17203	7	151052166	151052732							1
ENSG00000279352	AC006557.6	NA	2.815	0.73113	2.26019	0.312742	0.504814	1.94493	18	14010153	14010527		1					0
ENSG00000249158 #or# ENSG00000250120 /// ENSG00000250120	PCDHA10	protocadherin alpha 11 #or# protocadherin alpha 10 /// protocadherin alpha 10	5.12244	0.923681	2.24406	0.176942	0.752168	2.47136	5	141009938	141012344							1
ENSG00000161381	PLXDC1	plexin domain containing 1	5.37622	1.19297	2.24004	0.16332	0.786961	2.17203	17	39126939	39127004							1
ENSG00000268034	AC243960.2	NA	2.78621	0.461841	2.23927	0.302692	0.518999	2.59284	19	41506152	41506898		1					0
ENSG00000225580	AL358942.1	NA	5.6012	1.46226	2.23592	0.0899343	1.04607	1.93754	6	112616703	112617880		1					0
ENSG00000123572	NRK	Nik related kinase	2.78621	0.461841	2.23245	0.293623	0.532211	2.59284	0	105955601	105956593							1
ENSG00000198535	C2CD4A	C2 calcium dependent domain containing 4A	7.68366	1.38552	2.22106	0.0808582	1.09228	2.47136	15	62068724	62070917							1
ENSG00000189369	GSPT2	G1 to S phase transition 2	2.78621	0.461841	2.20887	0.267377	0.572876	2.59284	0	51745514	51746232							1
ENSG00000184922	FMNL1	formin like 1	5.6012	1.46226	2.19586	0.124928	0.90334	1.93754	17	45246210	45246475							1
ENSG00000105550	FGF21	fibroblast growth factor 21	2.56122	0.461841	2.19354	0.441079	0.355483	2.47136	19	48758221	48758333							1
ENSG00000156218	ADAMTSL3	ADAMTS like 3	2.56122	0.461841	2.17445	0.367383	0.434881	2.47136	15	83982273	83982305							1
ENSG00000253958	CLDN23	claudin 23	2.56122	0.461841	2.17054	0.355191	0.449538	2.47136	8	8703278	8704106							1
ENSG00000275092	AL031710.2	NA	2.78621	0.461841	2.16835	0.235666	0.627703	2.59284	16	1707252	1707973		1					0
ENSG00000118160	SLC8A2	solute carrier family 8 member A2	2.56122	0.461841	2.16018	0.32657	0.486024	2.47136	19	47466170	47466199							1
ENSG00000183921	SDR42E2	short chain dehydrogenase/reductase family 42E, member 2	2.56122	0.461841	2.15949	0.324804	0.488379	2.47136	16	22190394	22191754							1
ENSG00000248441	LINC01197	long intergenic non-protein coding RNA 1197	4.89745	0.923681	2.15929	0.13646	0.864996	2.40656	15	95288288	95288468			1				0
ENSG00000226386	PARD3-AS1	PARD3 antisense RNA 1	2.56122	0.461841	2.15704	0.318778	0.496511	2.47136	10	34816120	34816386							1
ENSG00000160886	LY6K	lymphocyte antigen 6 family member K	2.56122	0.461841	2.15532	0.314701	0.502102	2.47136	8	142702844	142703460							1
ENSG00000183671	GPR1	G protein-coupled receptor 1	2.56122	0.461841	2.15408	0.311806	0.506116	2.47136	2	206177248	206177275							1
ENSG00000258813	AL442663.3	NA	2.56122	0.461841	2.14774	0.297887	0.525948	2.47136	14	73057925	73058784		1					0
ENSG00000280106	AC008555.8	NA	4.89745	0.923681	2.14437	0.121658	0.91486	2.40656	19	34949038	34951205		1					0
ENSG00000273650	AC100793.4	NA	2.56122	0.461841	2.14087	0.28424	0.546314	2.47136	17	42751289	42751717		1					0
ENSG00000226711	FAM66C	family with sequence similarity 66 member C	4.89745	0.923681	2.14071	0.11825	0.9272	2.40656	12	8195277	8195652							1
ENSG00000235236	AC137630.2	NA	2.56122	0.461841	2.14036	0.283277	0.547788	2.47136	3	48979932	48980346		1					0
ENSG00000283183	AC116565.2	NA	2.56122	0.461841	2.1383	0.279474	0.553659	2.47136	4	584279	584866		1					0
ENSG00000242137	RPL11P5	ribosomal protein L11 pseudogene 5	2.56122	0.461841	2.13695	0.277042	0.557454	2.47136	12	120594015	120594548	1						0
ENSG00000215007	DNAJA1P3	DnaJ heat shock protein family (Hsp40) member A1 pseudogene 3	2.56122	0.461841	2.12903	0.263707	0.578878	2.47136	0	107351650	107352843	1						0
ENSG00000184557	SOCS3	suppressor of cytokine signaling 3	2.56122	0.461841	2.12728	0.260951	0.583441	2.47136	17	78359096	78359149							1
ENSG00000156869	FRRS1	ferric chelate reductase 1	2.78621	0.73113	2.12478	0.294064	0.531558	1.9301	1	99747595	99748768							1
ENSG00000101638	ST8SIA5	ST8 alpha-N-acetyl-neuraminide alpha-2,8-sialyltransferase 5	2.78621	0.73113	2.12477	0.297145	0.527031	1.9301	18	46730206	46730361							1
ENSG00000232486	AL592437.2	NA	2.78621	0.73113	2.12411	0.311762	0.506176	1.9301	9	105758370	105760755		1					0
ENSG00000244490	RWDD4P1	RWD domain containing 4 pseudogene 1	2.56122	0.461841	2.12344	0.255147	0.593209	2.47136	7	105301522	105302086	1						0
ENSG00000261519	AC010542.4	NA	2.78621	0.73113	2.12278	0.268923	0.570372	1.9301	16	66549280	66551189		1					0
ENSG00000267519	AC020916.1	NA	2.78621	0.73113	2.12147	0.334423	0.475704	1.9301	19	13834516	13836289		1					0
ENSG00000250687	AC146944.2	NA	2.78621	0.73113	2.11835	0.352084	0.453354	1.9301	5	70478482	70478581		1					0
ENSG00000279822	AC016397.2	NA	2.56122	0.461841	2.11568	0.244317	0.612047	2.47136	10	48443836	48445820		1					0
ENSG00000273398 /// ENSG00000243667 #or# ENSG00000273398 /// ENSG00000221823 #or# ENSG00000273398	AC017083.3	NA /// WD repeat domain 92 #or# NA /// protein phosphatase 3 regulatory subunit B, alpha #or# NA	5.12244	1.19297	2.11417	0.144257	0.840863	2.10227	2	68131238	68131445		1					0
ENSG00000280107	AL022393.1	NA	5.12244	1.19297	2.11199	0.130921	0.88299	2.10227	6	28170845	28172521		1					0
ENSG00000252947	SCARNA1	small Cajal body-specific RNA 1	2.56122	0.461841	2.11137	0.238784	0.621994	2.47136	1	27834401	27834566							1
ENSG00000115594	IL1R1	interleukin 1 receptor type 1	7.23369	1.65481	2.09867	0.0886894	1.05213	2.12806	2	102171801	102171829							1
ENSG00000138166	DUSP5	dual specificity phosphatase 5	10.0199	2.38594	2.09597	0.0280931	1.5514	2.07024	10	110510020	110510437							1
ENSG00000146966	DENND2A	DENN domain containing 2A	7.23369	1.65481	2.09567	0.070133	1.15408	2.12806	7	140602398	140602542							1
ENSG00000187848	P2RX2	purinergic receptor P2X 2	2.33623	0.461841	2.08726	0.469661	0.328215	2.33872	12	132621510	132622340							1
ENSG00000234006	DDX39B-AS1	DDX39B antisense RNA 1	2.33623	0.461841	2.08416	0.430095	0.366435	2.33872	6	31542709	31543138							1
ENSG00000143412	ANXA9	annexin A9	2.33623	0.461841	2.08203	0.404608	0.392965	2.33872	1	150984281	150984371							1
ENSG00000274677	AC040169.3	NA	2.33623	0.461841	2.08138	0.397042	0.401164	2.33872	16	84085979	84086590		1					0
ENSG00000259692	AC104041.1	NA	2.33623	0.461841	2.08065	0.388562	0.410539	2.33872	15	81660482	81660710		1					0
ENSG00000251211	AC136632.2	NA	2.33623	0.461841	2.07927	0.372945	0.428356	2.33872	5	178165702	178166562		1					0
ENSG00000247877	AC021086.1	NA	2.33623	0.461841	2.07875	0.367225	0.435068	2.33872	5	100450935	100451097		1					0
ENSG00000008517	IL32	interleukin 32	2.33623	0.461841	2.07865	0.366089	0.436414	2.33872	16	3068990	3069411							1
ENSG00000216853	MTCYBP36	mitochondrially encoded cytochrome b pseudogene 36	2.33623	0.461841	2.07763	0.354773	0.450049	2.33872	6	94446740	94447179	1						0
ENSG00000278472	AC009268.2	NA	2.33623	0.461841	2.07623	0.339579	0.469059	2.33872	15	33972059	33972515		1					0
ENSG00000259539	AC051619.6	NA	2.33623	0.461841	2.07614	0.338569	0.470353	2.33872	15	45152664	45153217		1					0
ENSG00000244459	AC147067.1	NA	2.33623	0.461841	2.07596	0.336595	0.472893	2.33872	4	1574062	1574544		1					0
ENSG00000108771	DHX58	DExH-box helicase 58	2.33623	0.461841	2.0754	0.330542	0.480774	2.33872	17	42111893	42111893							1
ENSG00000197172	MAGEA6	MAGE family member A6	2.33623	0.461841	2.07535	0.330008	0.481475	2.33872	0	152767651	152767715							1
ENSG00000244405 /// ENSG00000058866 #or# ENSG00000244405	ETV5	ETS variant 5 /// diacylglycerol kinase gamma #or# ETS variant 5	2.33623	0.461841	2.07534	0.329884	0.481639	2.33872	3	186105410	186105496							1
ENSG00000261438	AL157394.1	NA	2.33623	0.461841	2.07509	0.327152	0.48525	2.33872	10	89015836	89017059		1					0
ENSG00000149599	DUSP15	dual specificity phosphatase 15	2.33623	0.461841	2.07447	0.320408	0.494296	2.33872	20	31870338	31870572							1
ENSG00000246130	AC107959.2	NA	4.89745	1.19297	2.07385	0.211133	0.675445	2.03747	8	23081248	23083619		1					0
ENSG00000129167	TPH1	tryptophan hydroxylase 1	2.33623	0.461841	2.07378	0.31294	0.504539	2.33872	11	18042368	18042426							1
ENSG00000196535	MYO18A	myosin XVIIIA	7.45867	1.9241	2.07332	0.0572875	1.24194	1.95473	17	29133761	29133858							1
ENSG00000280046	AC104581.4	NA	2.33623	0.461841	2.0724	0.297818	0.52605	2.33872	17	7858943	7866083		1					0
ENSG00000240401 /// ENSG00000162997 #or# ENSG00000240401	AC012358.3	NA /// prolyl-tRNA synthetase associated domain containing 1, pseudogene #or# NA	2.33623	0.461841	2.07236	0.29748	0.526542	2.33872	2	55316879	55317212		1					0
ENSG00000243388	RPL3P3	ribosomal protein L3 pseudogene 3	2.33623	0.461841	2.07202	0.293676	0.532132	2.33872	14	56978409	56979621	1						0
ENSG00000117971	CHRNB4	cholinergic receptor nicotinic beta 4 subunit	2.33623	0.461841	2.07178	0.291034	0.536056	2.33872	15	78692578	78692894							1
ENSG00000279587	AC006963.1	NA	2.33623	0.461841	2.07166	0.289688	0.53807	2.33872	0	117894632	117895683		1					0
ENSG00000261187	AC079322.1	NA	2.33623	0.461841	2.07142	0.286983	0.542144	2.33872	15	72465128	72466262		1					0
ENSG00000241489 #or# ENSG00000241769 /// ENSG00000241769	LINC00893	long intergenic non-protein coding RNA 893 /// NA #or# long intergenic non-protein coding RNA 893	2.33623	0.461841	2.07093	0.281458	0.550587	2.33872	0	149536173	149536255			1				0
ENSG00000087116	ADAMTS2	ADAM metallopeptidase with thrombospondin type 1 motif 2	11.2312	2.57849	2.06967	0.022835	1.6414	2.12291	5	179150888	179151128							1
ENSG00000272662	AC073352.1	NA	2.33623	0.461841	2.06953	0.264993	0.576765	2.33872	3	119497678	119498181		1					0
ENSG00000273243	Z82243.1	NA	2.33623	0.461841	2.06944	0.26388	0.578594	2.33872	22	45155539	45156011		1					0
ENSG00000055955 #or# ENSG00000243696 /// ENSG00000055955	ITIH4	inter-alpha-trypsin inhibitor heavy chain family member 4 /// inter-alpha-trypsin inhibitor heavy chain family member 4 #or# NA	2.33623	0.461841	2.06874	0.255135	0.59323	2.33872	3	52829860	52830670							1
ENSG00000165060 #or# ENSG00000285130 /// ENSG00000285130	AL358113.1	NA /// frataxin #or# NA	2.33623	0.461841	2.06863	0.253657	0.595753	2.33872	9	69216339	69216366		1					0
ENSG00000188033 #or# ENSG00000269693	AC010422.6	zinc finger protein 490 #or# NA	2.56122	0.73113	2.06715	0.250747	0.600764	1.80863	19	12525720	12527916		1					0
ENSG00000157315	TMED6	transmembrane p24 trafficking protein 6	2.56122	0.73113	2.06198	0.278378	0.555365	1.80863	16	69343489	69343640							1
ENSG00000267416	AC025048.4	NA	2.56122	0.73113	2.06117	0.281811	0.550042	1.80863	17	60088161	60088695		1					0
ENSG00000281207	SLFNL1-AS1	SLFNL1 antisense RNA 1	2.56122	0.73113	2.05995	0.286822	0.542387	1.80863	1	41043115	41043890							1
ENSG00000222009	BTBD19	BTB domain containing 19	2.56122	0.73113	2.0587	0.291694	0.535073	1.80863	1	44813638	44814099							1
ENSG00000180257	ZNF816	zinc finger protein 816	4.67247	1.19297	2.0559	0.131734	0.880302	1.96963	19	52956090	52956104							1
ENSG00000173947	PIFO	primary cilia formation	7.45867	1.9241	2.05361	0.102991	0.987201	1.95473	1	111351259	111351513							1
ENSG00000149564	ESAM	endothelial cell adhesion molecule	4.67247	1.19297	2.05129	0.144029	0.841549	1.96963	11	124762155	124762290							1
ENSG00000132932	ATP8A2	ATPase phospholipid transporting 8A2	4.67247	1.19297	2.04945	0.149298	0.825947	1.96963	13	25927111	25927283							1
ENSG00000279452	AC006277.1	NA	5.12244	1.46226	2.04842	0.127164	0.895637	1.80863	19	2949035	2950644		1					0
ENSG00000231464	AC024937.2	NA	2.56122	0.73113	2.04809	0.327432	0.484878	1.80863	3	195997909	195998233		1					0
ENSG00000201465 /// ENSG00000201863 /// ENSG00000206878	RF00432	NA	2.56122	0.73113	2.0428	0.343087	0.464595	1.80863	7	138187998	138188129		1					0
ENSG00000165566	AMER2	APC membrane recruitment protein 2	2.56122	0.73113	2.02766	0.383783	0.415915	1.80863	13	25169091	25169603							1
ENSG00000240125	RPL23AP75	ribosomal protein L23a pseudogene 75	2.33623	0.73113	2.02473	0.257834	0.58866	1.67598	17	40439467	40439917	1						0
ENSG00000155886	SLC24A2	solute carrier family 24 member 2	4.44748	1.19297	2.02394	0.145888	0.835981	1.89843	9	19515980	19516152							1
ENSG00000267741	UBE2L4	ubiquitin conjugating enzyme E2 L4 (pseudogene)	4.67247	1.46226	2.02118	0.117577	0.929677	1.67598	19	9774497	9774960	1						0
ENSG00000213590	AL807752.1	NA	2.33623	0.73113	2.02074	0.264298	0.577906	1.67598	9	136935840	136937161		1					0
ENSG00000180592	SKIDA1	SKI/DACH domain containing 1	66.5107	16.6249	2.01433	3.25009e-08	7.48811	2.00024	10	21519508	21519658							1
ENSG00000050767	COL23A1	collagen type XXIII alpha 1 chain	2.33623	0.73113	2.01373	0.275777	0.559442	1.67598	5	178523505	178523713							1
ENSG00000259295	CSPG4P12	chondroitin sulfate proteoglycan 4 pseudogene 12	2.33623	0.73113	2.00881	0.283911	0.546818	1.67598	15	85207702	85213905	1						0
ENSG00000134245	WNT2B	Wnt family member 2B	6.75493	1.38552	2.00566	0.088485	1.05313	2.28551	1	112516140	112516417							1
ENSG00000205744	DENND1C	DENN domain containing 1C	2.11125	0.461841	2.00518	0.318194	0.497307	2.19263	19	6479713	6479718							1
ENSG00000256453	DND1	DND microRNA-mediated repression inhibitor 1	2.11125	0.461841	2.00329	0.324865	0.488297	2.19263	5	140670794	140671292							1
ENSG00000127328 #or# ENSG00000258052	AC025263.2	RAB3A interacting protein #or# NA	2.56122	0.73113	2.00315	0.442863	0.353731	1.80863	12	69855280	69855363		1					0
ENSG00000227225	MTND1P14	mitochondrially encoded NADH:ubiquinone oxidoreductase core subunit 1 pseudogene 14	2.11125	0.461841	2.00304	0.325787	0.487067	2.19263	17	19602259	19603208	1						0
ENSG00000278791	MIR6723	microRNA 6723	4.44748	1.19297	2.00143	0.189676	0.721987	1.89843	1	632325	632413				1			0
ENSG00000272644	AC097468.3	NA	3.26497	13.392	-2.00189	0.0217197	1.66315	-2.03623	2	219069354	219069809		1					0
ENSG00000271888	AL136162.1	NA	0.928736	3.04033	-2.00246	0.232981	0.63268	-1.71089	6	15243923	15245000		1					0
ENSG00000165548 /// ENSG00000165548 #or# ENSG00000198894	TMEM63C	transmembrane protein 63C #or# CLOCK interacting pacemaker /// transmembrane protein 63C	1.85747	6.34996	-2.00261	0.110466	0.95677	-1.77341	14	77256526	77256794							1
ENSG00000245293	AC096564.1	NA	0.703749	3.04033	-2.00343	0.275254	0.560267	-2.1111	4	107886717	107886826		1					0
ENSG00000051108 #or# ENSG00000261270 /// ENSG00000051108	HERPUD1	homocysteine inducible ER protein with ubiquitin like domain 1 /// homocysteine inducible ER protein with ubiquitin like domain 1 #or# NA	115.006	463.106	-2.00652	9.05604e-28	27.0431	-2.00963	16	56943126	56943407							1
ENSG00000232368	FTLP2	ferritin light chain pseudogene 2	5.34743	20.0112	-2.00668	0.00497442	2.30326	-1.90389	0	30630298	30630825	1						0
ENSG00000148655	LRMDA	leucine rich melanocyte differentiation associated	0.703749	3.04033	-2.00736	0.264239	0.578003	-2.1111	10	76557209	76557357							1
ENSG00000262772	LINC01977	long intergenic non-protein coding RNA 1977	0.703749	3.04033	-2.00847	0.261385	0.582719	-2.1111	17	79826084	79827704			1				0
ENSG00000258802	AL139317.2	NA	0.928736	3.04033	-2.01222	0.222536	0.6526	-1.71089	14	52798904	52799061		1					0
ENSG00000234494	SP2-AS1	SP2 antisense RNA 1	0.703749	3.65565	-2.01258	0.246997	0.607309	-2.377	17	47899631	47900378							1
ENSG00000139269	INHBE	inhibin subunit beta E	1.63248	6.69598	-2.01279	0.122543	0.911711	-2.03623	12	57456094	57456638							1
ENSG00000006025	OSBPL7	oxysterol binding protein like 7	2.78621	9.65958	-2.01307	0.0488754	1.31091	-1.79366	17	47819721	47820096							1
ENSG00000235787	AC092047.1	NA	0.928736	3.30962	-2.0199	0.296653	0.527751	-1.83333	3	42469640	42469879		1					0
ENSG00000138622	HCN4	hyperpolarization activated cyclic nucleotide gated potassium channel 4	0.928736	3.30962	-2.02553	0.281081	0.551168	-1.83333	15	73319859	73322480							1
ENSG00000128965	CHAC1	ChaC glutathione specific gamma-glutamylcyclotransferase 1	12.3561	49.6053	-2.03215	6.19802e-05	4.20775	-2.00527	15	40955775	40956167							1
ENSG00000166920	C15orf48	chromosome 15 open reading frame 48	0.703749	3.04033	-2.03262	0.215744	0.666061	-2.1111	15	45431001	45431325							1
ENSG00000140465	CYP1A1	cytochrome P450 family 1 subfamily A member 1	0.928736	3.30962	-2.03406	0.258459	0.587609	-1.83333	15	74722315	74722534							1
ENSG00000255458	AC108471.2	NA	0.928736	3.30962	-2.03483	0.256468	0.590967	-1.83333	4	39666123	39666568		1					0
ENSG00000147127	RAB41	RAB41, member RAS oncogene family	0.928736	3.30962	-2.03526	0.255359	0.59285	-1.83333	0	70284644	70285002							1
ENSG00000273366	Z83851.2	NA	0.928736	3.30962	-2.03857	0.24701	0.607285	-1.83333	22	42278188	42278846		1					0
ENSG00000175773	AP002986.1	NA	0.928736	3.30962	-2.03915	0.245583	0.609802	-1.83333	11	130403301	130403657		1					0
ENSG00000241484	ARHGAP8	Rho GTPase activating protein 8	1.85747	6.61925	-2.0408	0.0944918	1.02461	-1.83333	22	44862275	44862463							1
ENSG00000234289 /// ENSG00000274559	H2BFS	H2B histone family member S	0.928736	3.30962	-2.04291	0.236416	0.626324	-1.83333	21	43565620	43565648							1
ENSG00000166323	C11orf65	chromosome 11 open reading frame 65	0.928736	3.30962	-2.04376	0.234401	0.63004	-1.83333	11	108461560	108461569							1
ENSG00000101115	SALL4	spalt like transcription factor 4	0.928736	3.23288	-2.05528	0.310794	0.507528	-1.79948	20	51792068	51792352							1
ENSG00000207605	MIR191	microRNA 191	0.703749	3.38636	-2.05721	0.383221	0.416551	-2.2666	3	49020618	49020709				1			0
ENSG00000121716	PILRB	paired immunoglobin-like type 2 receptor beta	0.703749	3.30962	-2.07063	0.238721	0.62211	-2.23353	7	100367378	100367398							1
ENSG00000117586	TNFSF4	TNF superfamily member 4	0.703749	3.30962	-2.07081	0.253958	0.595237	-2.23353	1	173188464	173188569							1
ENSG00000162595	DIRAS3	DIRAS family GTPase 3	0.703749	3.30962	-2.07092	0.258713	0.587182	-2.23353	1	68045962	68046607							1
ENSG00000261346	AC116348.3	NA	0.703749	3.30962	-2.07118	0.213377	0.670852	-2.23353	16	30477180	30477374		1					0
ENSG00000272189	AL024508.2	NA	0.703749	3.30962	-2.07129	0.270803	0.567346	-2.23353	6	136550661	136552554		1					0
ENSG00000273320	AC007032.1	NA	0.703749	3.30962	-2.07132	0.271485	0.566254	-2.23353	7	106285480	106286326		1					0
ENSG00000267355	RPL9P29	ribosomal protein L9 pseudogene 29	0.703749	3.30962	-2.07166	0.280417	0.552195	-2.23353	17	78845953	78846433	1						0
ENSG00000175197	DDIT3	DNA damage inducible transcript 3	49.4245	205.349	-2.08491	5.35291e-16	15.2714	-2.05478	12	57517476	57517542							1
ENSG00000273017	AP000240.1	NA	1.63248	6.88854	-2.09057	0.0939067	1.0273	-2.07713	21	29359002	29359453		1					0
ENSG00000258320	AC090502.4	NA	0.928736	3.57891	-2.09527	0.202236	0.694142	-1.94618	12	74170445	74171830		1					0
ENSG00000267226	AC104971.1	NA	0.928736	3.57891	-2.09538	0.281442	0.550611	-1.94618	18	58670009	58670808		1					0
ENSG00000214093	AL096701.1	NA	0.928736	3.57891	-2.09761	0.215742	0.666065	-1.94618	22	31559483	31559939		1					0
ENSG00000156711	MAPK13	mitogen-activated protein kinase 13	0.928736	3.57891	-2.09765	0.216055	0.665436	-1.94618	6	36136484	36136515							1
ENSG00000272263	AC034198.2	NA	0.928736	3.57891	-2.0984	0.248125	0.60533	-1.94618	3	12832219	12832728		1					0
ENSG00000136160	EDNRB	endothelin receptor type B	1.63248	7.15782	-2.11263	0.0798381	1.09779	-2.13245	13	77899502	77899822							1
ENSG00000273723	AL139089.1	NA	3.26497	14.3156	-2.11612	0.0149902	1.82419	-2.13245	13	52651305	52652279		1					0
ENSG00000053918	KCNQ1	potassium voltage-gated channel subfamily Q member 1	0.703749	3.57891	-2.1201	0.209016	0.679821	-2.34639	11	2848004	2848293							1
ENSG00000229980	TOB1-AS1	TOB1 antisense RNA 1	2.56122	11.006	-2.12636	0.0352516	1.45282	-2.10339	17	50909156	50909417							1
ENSG00000154319	FAM167A	family with sequence similarity 167 member A	0.703749	3.57891	-2.12714	0.220315	0.656955	-2.34639	8	11444577	11444808							1
ENSG00000261292	AC110491.1	NA	0.703749	3.57891	-2.12812	0.222053	0.653544	-2.34639	3	97759523	97761532		1					0
ENSG00000283597	FAM169B	family with sequence similarity 169 member B	0.703749	3.57891	-2.13312	0.231618	0.635228	-2.34639	15	98518800	98518892							1
ENSG00000154721	JAM2	junctional adhesion molecule 2	3.96872	18.1639	-2.1382	0.00761029	2.1186	-2.19433	21	25714640	25714889							1
ENSG00000164362	TERT	telomerase reverse transcriptase	0.928736	3.8482	-2.13884	0.193842	0.712553	-2.05084	5	1294558	1294666							1
ENSG00000227514	AC107890.1	NA	0.703749	3.57891	-2.14082	0.248943	0.603899	-2.34639	8	113377065	113377227		1					0
ENSG00000182511	FES	FES proto-oncogene, tyrosine kinase	0.703749	3.57891	-2.14196	0.251819	0.598912	-2.34639	15	90890366	90890525							1
ENSG00000281332	LINC00997	long intergenic non-protein coding RNA 997	2.33623	10.3907	-2.14365	0.036113	1.44234	-2.15304	7	32760279	32762924			1				0
ENSG00000092850	TEKT2	tektin 2	0.928736	3.8482	-2.15945	0.219965	0.657646	-2.05084	1	36087812	36088275							1
ENSG00000236499	LINC00896	long intergenic non-protein coding RNA 896	1.63248	7.08109	-2.16018	0.10446	0.981048	-2.1169	22	20206577	20207183			1				0
ENSG00000250846	EPHA5-AS1	EPHA5 antisense RNA 1	0.928736	3.8482	-2.16245	0.226721	0.644509	-2.05084	4	65697949	65698029							1
ENSG00000179292	TMEM151A	transmembrane protein 151A	0.928736	3.8482	-2.16652	0.239145	0.621339	-2.05084	11	66295654	66296664							1
ENSG00000142961	MOB3C	MOB kinase activator 3C	0.928736	3.8482	-2.16788	0.244809	0.611172	-2.05084	1	46610002	46610204							1
ENSG00000170745	KCNS3	potassium voltage-gated channel modifier subfamily S member 3	0.703749	3.8482	-2.16876	0.197237	0.705011	-2.45105	2	17930950	17931008							1
ENSG00000250091	DNAH10OS	dynein axonemal heavy chain 10 opposite strand	0.928736	3.8482	-2.17178	0.298364	0.525253	-2.05084	12	123926424	123930543							1
ENSG00000272405	AL365181.3	NA	0.928736	3.8482	-2.17187	0.282043	0.549684	-2.05084	1	156641666	156644887		1					0
ENSG00000239291	AC002558.1	NA	0.928736	3.50217	-2.17571	0.22433	0.649113	-1.91491	17	47159191	47159993		1					0
ENSG00000267185	PTP4A2P1	protein tyrosine phosphatase type IVA, member 2 pseudogene 1	0.703749	3.8482	-2.17864	0.203654	0.691108	-2.45105	17	42533532	42534009	1						0
ENSG00000239827 /// ENSG00000168852 #or# ENSG00000239827	SUGT1P3	SUGT1 pseudogene 3 /// transmembrane phosphoinositide 3-phosphatase and tensin homolog 2 pseudogene 5 #or# SUGT1 pseudogene 3	1.63248	7.6964	-2.18126	0.0862807	1.06409	-2.23712	13	40913916	40914105	1						0
ENSG00000182952	HMGN4	high mobility group nucleosomal binding domain 4	0.703749	3.8482	-2.1841	0.2077	0.682563	-2.45105	6	26539901	26539949							1
ENSG00000196890	HIST3H2BB	histone cluster 3 H2B family member b	1.63248	7.35038	-2.19476	0.0833148	1.07928	-2.17075	1	228458511	228460470							1
ENSG00000165863	C10orf82	chromosome 10 open reading frame 82	0.928736	3.50217	-2.1999	0.195768	0.708259	-1.91491	10	116664286	116665826							1
ENSG00000203497	PDCD4-AS1	PDCD4 antisense RNA 1	0.703749	3.50217	-2.21357	0.215747	0.666054	-2.31512	10	110869868	110870438							1
ENSG00000274849	AC023043.4	NA	1.63248	7.61967	-2.22405	0.081918	1.08662	-2.22266	18	36189824	36190272		1					0
ENSG00000231821	NPM1P48	nucleophosmin 1 pseudogene 48	0.928736	4.11749	-2.22465	0.211205	0.675295	-2.14843	2	4514204	4515056	1						0
ENSG00000087494	PTHLH	parathyroid hormone like hormone	0.928736	4.11749	-2.22504	0.211631	0.67442	-2.14843	12	27970011	27970134							1
ENSG00000242338	BMS1P4	BMS1, ribosome biogenesis factor pseudogene 4	0.703749	3.8482	-2.23033	0.264495	0.577583	-2.45105	10	73717115	73717192	1						0
ENSG00000272173	U47924.2	NA	0.703749	3.50217	-2.23201	0.182536	0.738651	-2.31512	12	6943508	6944604		1					0
ENSG00000168491	CCDC110	coiled-coil domain containing 110	0.928736	3.77146	-2.24618	0.190416	0.720298	-2.02178	4	185461083	185461159							1
ENSG00000260747	AC022968.1	NA	0.703749	4.11749	-2.2503	0.199966	0.699043	-2.54863	18	68277802	68278243		1					0
ENSG00000267332	BOLA3P2	bolA family member 3 pseudogene 2	0.928736	4.11749	-2.25282	0.305727	0.514666	-2.14843	19	9019787	9019984	1						0
ENSG00000168772	CXXC4	CXXC finger protein 4	3.74373	19.5494	-2.265	0.00348879	2.45733	-2.38457	4	104472175	104472366							1
ENSG00000205560	CPT1B	carnitine palmitoyltransferase 1B	0.703749	4.11749	-2.26712	0.210128	0.677515	-2.54863	22	50577916	50577934							1
ENSG00000270195	AC016773.1	NA	0.703749	4.11749	-2.26851	0.211092	0.675529	-2.54863	4	1712821	1713622		1					0
ENSG00000152208	GRID2	glutamate ionotropic receptor delta type subunit 2	0.703749	3.77146	-2.26964	0.258155	0.588119	-2.42199	4	93806874	93810157							1
ENSG00000251050	AC112184.1	NA	0.703749	3.77146	-2.26993	0.241963	0.61625	-2.42199	5	80019609	80019920		1					0
ENSG00000231615	AL645568.2	NA	0.703749	3.77146	-2.27024	0.232421	0.633724	-2.42199	1	173362397	173363733		1					0
ENSG00000214193	SH3D21	SH3 domain containing 21	0.703749	3.77146	-2.27119	0.215049	0.667462	-2.42199	1	36323770	36323965							1
ENSG00000273473	BX649601.1	NA	0.703749	3.77146	-2.27243	0.201111	0.696564	-2.42199	9	134168769	134169340		1					0
ENSG00000261766	AC133550.2	NA	0.703749	3.8482	-2.27397	0.402114	0.395651	-2.45105	16	28862166	28862530		1					0
ENSG00000224050	AL008723.1	NA	0.703749	3.77146	-2.27502	0.182531	0.738663	-2.42199	22	32276685	32277186		1					0
ENSG00000138172	CALHM2	calcium homeostasis modulator family member 2	0.703749	3.77146	-2.28117	0.157918	0.801567	-2.42199	10	103450412	103450800							1
ENSG00000275854	AC084824.4	NA	1.85747	8.08151	-2.29355	0.0570233	1.24395	-2.12128	12	32736930	32737660		1					0
ENSG00000237343	AC246785.3	NA	0.928736	4.04075	-2.29787	0.179526	0.745872	-2.12128	1	144418113	144418370		1					0
ENSG00000224805	LINC00853	long intergenic non-protein coding RNA 853	0.928736	4.04075	-2.29894	0.172729	0.762636	-2.12128	1	47179868	47180339			1				0
ENSG00000120318	ARAP3	ArfGAP with RhoGAP domain, ankyrin repeat and PH domain 3	0.928736	4.04075	-2.30016	0.163799	0.78569	-2.12128	5	141672768	141672925							1
ENSG00000270344	POC1B-AS1	POC1B antisense RNA 1	0.703749	4.04075	-2.32036	0.159975	0.795948	-2.52149	12	89540108	89548005							1
ENSG00000108515	ENO3	enolase 3	0.703749	4.04075	-2.32063	0.160657	0.794101	-2.52149	17	4956978	4957129							1
ENSG00000167680	SEMA6B	semaphorin 6B	1.4075	7.81222	-2.32529	0.0720542	1.14234	-2.4726	19	4545790	4546274							1
ENSG00000283697	HSFX3	heat shock transcription factor family, X-linked member 3	0.703749	4.04075	-2.32941	0.186758	0.728721	-2.52149	0	149548210	149548391							1
ENSG00000281357	ARRDC3-AS1	ARRDC3 antisense RNA 1	0.703749	4.04075	-2.33441	0.205654	0.686863	-2.52149	5	91422778	91422963							1
ENSG00000228801	AC064807.1	NA	1.63248	8.3508	-2.3358	0.0484296	1.31489	-2.35484	8	51911420	51911729		1					0
ENSG00000275263	AC135048.3	NA	1.85747	8.62009	-2.34011	0.0533165	1.27314	-2.21436	16	30956872	30957199		1					0
ENSG00000166250	CLMP	CXADR like membrane protein	0.928736	4.31004	-2.34112	0.151628	0.819221	-2.21436	11	123083082	123083207							1
ENSG00000270083	AL021878.2	NA	0.928736	3.96401	-2.34451	0.198851	0.701472	-2.09362	22	42089630	42090028		1					0
ENSG00000230679	ENO1-AS1	ENO1 antisense RNA 1	0.928736	4.31004	-2.34818	0.165616	0.780899	-2.21436	1	8879565	8879894							1
ENSG00000253598	SLC10A5	solute carrier family 10 member 5	0.928736	4.31004	-2.35221	0.180721	0.742991	-2.21436	8	81693607	81693655							1
ENSG00000260583	AP000223.1	NA	0.928736	4.31004	-2.35353	0.189899	0.721477	-2.21436	21	25582770	25583326		1					0
ENSG00000265750	AC090772.3	NA	0.703749	4.31004	-2.37499	0.162843	0.788232	-2.61457	18	24159509	24159828		1					0
ENSG00000262003	AC087392.1	NA	0.703749	4.31004	-2.38491	0.17442	0.758403	-2.61457	17	910694	911212		1					0
ENSG00000049192	ADAMTS6	ADAM metallopeptidase with thrombospondin type 1 motif 6	0.703749	4.31004	-2.38723	0.177546	0.750689	-2.61457	5	65451316	65451620							1
ENSG00000114812	VIPR1	vasoactive intestinal peptide receptor 1	1.4075	8.88937	-2.38845	0.0427341	1.36923	-2.65895	3	42536090	42537567							1
ENSG00000271474	AC106881.1	NA	0.703749	4.31004	-2.39464	0.188772	0.724063	-2.61457	4	95549129	95552457		1					0
ENSG00000114279	FGF12	fibroblast growth factor 12	2.33623	12.8534	-2.40127	0.0153416	1.81413	-2.45989	3	192726882	192727323							1
ENSG00000129152	MYOD1	myogenic differentiation 1	0.928736	4.57933	-2.40676	0.167245	0.776646	-2.3018	11	17721509	17722131							1
ENSG00000270933	AC010719.1	NA	2.33623	12.5074	-2.41172	0.0186573	1.72915	-2.42052	7	25948657	25949403		1					0
ENSG00000204052	LRRC73	leucine rich repeat containing 73	0.928736	4.57933	-2.41561	0.185579	0.731471	-2.3018	6	43506969	43507237							1
ENSG00000115232	ITGA4	integrin subunit alpha 4	0.703749	4.57933	-2.41774	0.149614	0.825028	-2.702	2	181524171	181524365							1
ENSG00000227252	AC105760.2	NA	0.703749	4.57933	-2.42703	0.154779	0.810288	-2.702	2	237059434	237060112		1					0
ENSG00000272763	AC103702.2	NA	2.11125	13.1227	-2.42918	0.0137542	1.86157	-2.6359	17	48636546	48636773		1					0
ENSG00000165194	PCDH19	protocadherin 19	0.928736	4.2333	-2.4443	0.128967	0.889522	-2.18844	0	100350662	100350704							1
ENSG00000240086	AC128689.1	NA	0.703749	4.2333	-2.44487	0.181876	0.740225	-2.58865	3	135379046	135379427		1					0
ENSG00000271072	PHBP20	prohibitin pseudogene 20	0.703749	4.2333	-2.45375	0.143055	0.844498	-2.58865	15	72450657	72451474	1						0
ENSG00000275834	AC084368.1	NA	0.703749	4.2333	-2.45957	0.129449	0.8879	-2.58865	7	96306810	96306874		1					0
ENSG00000204634	TBC1D8	TBC1 domain family member 8	0.928736	4.50259	-2.47334	0.139669	0.854899	-2.27742	2	101187984	101188328							1
ENSG00000226478	UPF3AP1	UPF3A pseudogene 1	0.928736	4.50259	-2.47593	0.132538	0.87766	-2.27742	17	16745636	16746761	1						0
ENSG00000262587	AC133552.2	NA	0.928736	4.50259	-2.47685	0.130054	0.885877	-2.27742	16	25058016	25058109		1					0
ENSG00000183287	CCBE1	collagen and calcium binding EGF domains 1	0.928736	4.50259	-2.48015	0.12137	0.915888	-2.27742	18	59454932	59454951							1
ENSG00000028277	POU2F2	POU class 2 homeobox 2	0.703749	4.50259	-2.49906	0.14352	0.843087	-2.67762	19	42122093	42122182							1
ENSG00000143178	TBX19	T-box 19	0.703749	4.50259	-2.49937	0.145703	0.836532	-2.67762	1	168312708	168314424							1
ENSG00000188107	EYS	eyes shut homolog (Drosophila)	0.703749	4.50259	-2.50163	0.161885	0.790793	-2.67762	6	65490660	65490707							1
ENSG00000128652 #or# ENSG00000278500	AC009336.2	homeobox D3 #or# NA	0.928736	4.77188	-2.5101	0.107939	0.96682	-2.36122	2	176171517	176173097		1					0
ENSG00000235695	AC130472.1	NA	0.928736	4.77188	-2.51896	0.152058	0.817991	-2.36122	3	47663626	47663934		1					0
ENSG00000278390	AL354696.2	NA	0.703749	4.77188	-2.52697	0.111927	0.951063	-2.76143	13	41187231	41187568		1					0
ENSG00000213453	FTH1P3	ferritin heavy chain 1 pseudogene 3	2.11125	14.3924	-2.54281	0.0115835	1.93616	-2.76914	2	27392784	27393367	1						0
ENSG00000258057	BCDIN3D-AS1	BCDIN3D antisense RNA 1	0.703749	4.77188	-2.55888	0.157973	0.801417	-2.76143	12	49840127	49840204							1
ENSG00000201470	RNY4P7	RNA, Ro-associated Y4 pseudogene 7	0.928736	5.04117	-2.57299	0.148225	0.829077	-2.44042	2	127798903	127798998	1						0
ENSG00000272812	AC004908.2	NA	0.703749	5.04117	-2.59607	0.128773	0.890176	-2.84063	8	233119	233692		1					0
ENSG00000236646	LAMTOR5P1	late endosomal/lysosomal adaptor, MAPK and MTOR activator 5 pseudogene 1	0.703749	5.31046	-2.60469	0.105739	0.975766	-2.9157	1	62038842	62039111	1						0
ENSG00000235420	RPL29P30	ribosomal protein L29 pseudogene 30	0.703749	4.69514	-2.61339	0.111918	0.951101	-2.73804	15	70796657	70797131	1						0
ENSG00000179331	RAB39A	RAB39A, member RAS oncogene family	0.928736	4.96443	-2.62021	0.128511	0.89106	-2.41829	11	107962373	107963482							1
ENSG00000277744	AC011462.4	NA	0.703749	4.96443	-2.65191	0.115332	0.93805	-2.8185	19	41373971	41374419		1					0
ENSG00000261052	SULT1A3	sulfotransferase family 1A member 3	0.703749	4.96443	-2.652	0.111499	0.952729	-2.8185	16	30203808	30203959							1
ENSG00000279355	AGPAT4-IT1	AGPAT4 intronic transcript 1	0.928736	5.23372	-2.66801	0.118516	0.926221	-2.4945	6	161160105	161161982							1
ENSG00000257556	LINC02298	long intergenic non-protein coding RNA 2298	0.928736	5.23372	-2.66921	0.11007	0.958329	-2.4945	14	105095540	105095767			1				0
ENSG00000188051	TMEM221	transmembrane protein 221	0.928736	5.23372	-2.67006	0.100321	0.99861	-2.4945	19	17444812	17445284							1
ENSG00000166839	ANKDD1A	ankyrin repeat and death domain containing 1A	0.928736	5.23372	-2.67008	0.0998472	1.00066	-2.4945	15	64943484	64943756							1
ENSG00000228327	AL669831.1	NA	0.703749	5.23372	-2.68851	0.096424	1.01581	-2.89471	1	764723	764800		1					0
ENSG00000182600 /// ENSG00000182600 #or# ENSG00000204120	SNORC	secondary ossification center associated regulator of chondrocyte maturation /// secondary ossification center associated regulator of chondrocyte maturation #or# GRB10 interacting GYF protein 2	0.703749	5.23372	-2.6915	0.101534	0.99339	-2.89471	2	232878452	232878708					1		0
ENSG00000276337	AC105429.1	NA	0.928736	5.50301	-2.70374	0.0901894	1.04484	-2.56688	16	87470370	87474370		1					0
ENSG00000281912	LINC01144	long intergenic non-protein coding RNA 1144	0.703749	4.8877	-2.72397	0.0919143	1.03662	-2.79602	1	45303910	45305619			1				0
ENSG00000176933	TOB2P1	transducer of ERBB2, 2 pseudogene 1	0.703749	5.15699	-2.74058	0.119308	0.92333	-2.8734	6	28217643	28218634	1						0
ENSG00000099958	DERL3	derlin 3	16.2961	104.674	-2.75123	2.39364e-11	10.6209	-2.68331	22	23836767	23837154							1
ENSG00000271200	AC099791.2	NA	0.928736	5.7723	-2.75646	0.101012	0.995625	-2.63581	1	61741998	61742424		1					0
ENSG00000251178	OR7E21P	olfactory receptor family 7 subfamily E member 21 pseudogene	0	2.19339	-2.7574	0.208417	0.681067	?	3	130034553	130035539	1						0
ENSG00000196154	S100A4	S100 calcium binding protein A4	0.703749	5.7723	-2.76023	0.0871112	1.05993	-3.03601	1	153543621	153543758							1
ENSG00000217576 #or# ENSG00000243406 #or# ENSG00000285160	AL139082.2	NA #or# mitochondrial ribosomal protein S31 pseudogene 5 #or# NA	0	2.19339	-2.77969	0.233756	0.631238	?	13	52167954	52168321		1					0
ENSG00000166446	CDYL2	chromodomain Y like 2	0.703749	5.42627	-2.78717	0.124989	0.903127	-2.94683	16	80684604	80685129							1
ENSG00000283010	AL589826.2	NA	0	2.19339	-2.7904	0.249388	0.603124	?	6	98829967	98830409		1					0
ENSG00000280594	BTG3-AS1	BTG3 antisense RNA 1	0.703749	5.42627	-2.79259	0.082397	1.08409	-2.94683	21	17611773	17614113							1
ENSG00000235609 #or# ENSG00000281903 /// ENSG00000235609	AF127577.4	NA /// NA #or# long intergenic non-protein coding RNA 2246	1.63248	11.4679	-2.79334	0.0177518	1.75076	-2.81246	21	14818843	14824415		1					0
ENSG00000107201	DDX58	DExD/H-box helicase 58	0.703749	5.42627	-2.7936	0.0795884	1.09915	-2.94683	9	32455705	32457121							1
ENSG00000254948	OR7E158P	olfactory receptor family 7 subfamily E member 158 pseudogene	0	2.19339	-2.80191	0.26966	0.569183	?	8	11919900	11920809	1						0
ENSG00000213104	NPM1P46	nucleophosmin 1 pseudogene 46	0.928736	5.69556	-2.80629	0.0859458	1.06578	-2.6165	2	197379701	197380317	1						0
ENSG00000130822	PNCK	pregnancy up-regulated nonubiquitous CaM kinase	0	2.19339	-2.80702	0.280062	0.552746	?	0	153686625	153686683							1
ENSG00000267787	AC027097.2	NA	0	2.19339	-2.8189	0.308626	0.510568	?	18	57737762	57738044		1					0
ENSG00000157103	SLC6A1	solute carrier family 6 member 1	0	2.19339	-2.8191	0.309158	0.50982	?	3	11036862	11039169							1
ENSG00000261764	KRT18P18	keratin 18 pseudogene 18	0	2.19339	-2.82493	0.326019	0.486757	?	16	72728616	72729894	1						0
ENSG00000277147 #or# ENSG00000284964	AC242842.2	long intergenic non-protein coding RNA 869 #or# NA	0.703749	5.69556	-2.82786	0.0836283	1.07765	-3.01671	1	149608462	149608516		1					0
ENSG00000276900	AC023157.3	NA	0.703749	5.69556	-2.82799	0.0840338	1.07555	-3.01671	12	31729117	31731204		1					0
ENSG00000230373 /// ENSG00000230373 #or# ENSG00000259244	GOLGA6L5P	golgin A6 family-like 5, pseudogene #or# NA /// golgin A6 family-like 5, pseudogene	0.703749	5.69556	-2.83043	0.0920547	1.03595	-3.01671	15	84512718	84512833	1						0
ENSG00000072657	TRHDE	thyrotropin releasing hormone degrading enzyme	0.928736	5.61883	-2.83542	0.100171	0.999258	-2.59693	12	72621108	72621331							1
ENSG00000164342	TLR3	toll like receptor 3	0	2.19339	-2.83939	0.379	0.421361	?	4	186082320	186082717							1
ENSG00000155749	ALS2CR12	amyotrophic lateral sclerosis 2 chromosome region 12	0	2.11665	-2.83983	0.464863	0.332675	?	2	201351405	201351451							1
ENSG00000149654	CDH22	cadherin 22	0	2.11665	-2.84149	0.428563	0.367986	?	20	46209821	46210560							1
ENSG00000199150	MIRLET7G	microRNA let-7g	0	2.19339	-2.84538	0.407296	0.39009	?	3	52268278	52268361				1			0
ENSG00000229835	KHSRPP1	KH-type splicing regulatory protein pseudogene 1	0	2.11665	-2.84584	0.354854	0.449951	?	9	21695176	21696943	1						0
ENSG00000273464	AP000238.1	NA	0	2.11665	-2.8465	0.345608	0.461416	?	21	29657406	29657831		1					0
ENSG00000235555	SUMO1P4	SUMO1 pseudogene 4	0	2.11665	-2.84691	0.340196	0.46827	?	19	49275119	49275420	1						0
ENSG00000223652	AC106786.1	NA	0	2.19339	-2.84797	0.4211	0.375615	?	5	123087634	123087939		1					0
ENSG00000130234	ACE2	angiotensin I converting enzyme 2	0	2.19339	-2.8482	0.422451	0.374224	?	0	15594887	15595003							1
ENSG00000229000	SEPT7P8	septin 7 pseudogene 8	0	2.11665	-2.84896	0.314907	0.501818	?	19	53772506	53773280	1						0
ENSG00000199552	RF00092	NA	0	2.11665	-2.84951	0.308739	0.510409	?	3	183453814	183453944		1					0
ENSG00000243795	LINC02044	long intergenic non-protein coding RNA 2044	0	2.11665	-2.85048	0.298331	0.525302	?	3	113142350	113144335			1				0
ENSG00000176697	BDNF	brain derived neurotrophic factor	0	2.19339	-2.85097	0.43854	0.357991	?	11	27654893	27657820							1
ENSG00000011465	DCN	decorin	0	2.11665	-2.85363	0.268406	0.571207	?	12	91179199	91179732							1
ENSG00000198768	APCDD1L	APC down-regulated 1 like	0	2.11665	-2.85413	0.264198	0.578071	?	20	58513899	58513987							1
ENSG00000175564	UCP3	uncoupling protein 3	0	2.11665	-2.85462	0.260179	0.584727	?	11	74007043	74007304							1
ENSG00000232480	TGFB2-AS1	TGFB2 antisense RNA 1 (head to head)	0	2.11665	-2.855	0.257037	0.590004	?	1	218344196	218344462							1
ENSG00000140285	FGF7	fibroblast growth factor 7	0	2.11665	-2.8556	0.252357	0.597985	?	15	49484310	49484520							1
ENSG00000232445	AC006329.1	NA	0.703749	5.96485	-2.8573	0.0728588	1.13752	-3.08335	7	101310484	101310985		1					0
ENSG00000256293	AC135279.2	NA	0	2.11665	-2.85832	0.232755	0.633101	?	12	64338178	64338797		1					0
ENSG00000227583	RPS3AP37	ribosomal protein S3a pseudogene 37	0	2.11665	-2.85886	0.229189	0.639806	?	10	68674356	68675100	1						0
ENSG00000164845	FAM86FP	family with sequence similarity 86 member F, pseudogene	0	2.11665	-2.85912	0.227455	0.643105	?	12	8234342	8234425	1						0
ENSG00000181585	TMIE	transmembrane inner ear	0	2.11665	-2.86002	0.221792	0.654055	?	3	46709689	46710886							1
ENSG00000118514	ALDH8A1	aldehyde dehydrogenase 8 family member A1	0	2.11665	-2.86092	0.216361	0.66482	?	6	134942539	134942564							1
ENSG00000208006	MIR16-1	microRNA 16-1	0.703749	6.04159	-2.86119	0.115529	0.937307	-3.1018	13	50048973	50049061				1			0
ENSG00000269420	PLA2G4C-AS1	PLA2G4C antisense RNA 1	0	2.19339	-2.86149	0.515434	0.287827	?	19	48061913	48062222							1
ENSG00000268288	AL589765.5	NA	0	2.11665	-2.8627	0.206289	0.685523	?	1	151766486	151767000		1					0
ENSG00000101282	RSPO4	R-spondin 4	0	2.19339	-2.86279	0.527299	0.277943	?	20	960254	960356							1
ENSG00000240877	RN7SL521P	RNA, 7SL, cytoplasmic 521, pseudogene	0.703749	5.96485	-2.86303	0.0777728	1.10917	-3.08335	7	149125690	149125986	1						0
ENSG00000221184	MIR1254-1	microRNA 1254-1	0	2.11665	-2.86361	0.201461	0.695809	?	10	68759318	68759414				1			0
ENSG00000264546	AC008026.3	NA	0	2.11665	-2.86369	0.201042	0.696713	?	17	62551603	62552121		1					0
ENSG00000197261	C6orf141	chromosome 6 open reading frame 141	0	2.11665	-2.86588	0.190259	0.720656	?	6	49554877	49555060							1
ENSG00000183463	URAD	ureidoimidazoline (2-oxo-4-hydroxy-4-carboxy-5-) decarboxylase	0	2.11665	-2.86705	0.184864	0.733147	?	13	27977714	27978105							1
ENSG00000203739	AL645568.1	NA	0	2.11665	-2.86841	0.178988	0.747176	?	1	173418074	173418622		1					0
ENSG00000200211	RNY4P27	RNA, Ro-associated Y4 pseudogene 27	0	2.19339	-2.86888	0.592931	0.226996	?	13	95336106	95336201	1						0
ENSG00000165076	PRSS37	serine protease 37	0	2.19339	-2.87105	0.621784	0.20636	?	7	141836359	141836535							1
ENSG00000199094	MIR30C2	microRNA 30c-2	0	2.19339	-2.87105	0.621784	0.20636	?	6	71376960	71377031				1			0
ENSG00000235089	AL357632.1	NA	0	2.11665	-2.87154	0.166555	0.778442	?	1	81208568	81209210		1					0
ENSG00000272862	AC106052.1	NA	0	2.11665	-2.87281	0.161969	0.790569	?	4	41988741	41989237		1					0
ENSG00000250613	AC110768.2	NA	0	2.11665	-2.873	0.161295	0.792378	?	4	10411401	10411644		1					0
ENSG00000269637	RPL12P41	ribosomal protein L12 pseudogene 41	0.703749	6.23414	-2.87374	0.0641135	1.19305	-3.14706	19	46219423	46219920	1						0
ENSG00000267291	AC008649.1	NA	0.703749	5.96485	-2.87474	0.0916223	1.038	-3.08335	19	38601413	38601694		1					0
ENSG00000260918	AC107398.3	NA	0	2.11665	-2.87475	0.155369	0.808636	?	4	47431960	47438959		1					0
ENSG00000059915	PSD	pleckstrin and Sec7 domain containing	0	2.11665	-2.87535	0.153405	0.814161	?	10	102416710	102417121							1
ENSG00000272864	AC135803.1	NA	0	2.11665	-2.87603	0.15127	0.820248	?	1	74698769	74699333		1					0
ENSG00000274226	TBC1D3H	TBC1 domain family member 3H	0	2.11665	-2.87606	0.151172	0.820529	?	17	36377531	36377845							1
ENSG00000104953	TLE6	transducin like enhancer of split 6	0.928736	5.88812	-2.87955	0.0932035	1.03057	-2.66447	19	2991843	2991939							1
ENSG00000224854	CDKN2A-DT	CDKN2A divergent transcript	0	2.11665	-2.88017	0.139227	0.856277	?	9	21966929	21967751							1
ENSG00000067057 #or# ENSG00000278419	AL451164.3	phosphofructokinase, platelet #or# NA	0	2.11665	-2.88566	0.125709	0.900634	?	10	3144971	3145166		1					0
ENSG00000175264	CHST1	carbohydrate sulfotransferase 1	0	2.11665	-2.88645	0.123951	0.90675	?	11	45651233	45652090							1
ENSG00000253488	SINHCAFP3	SINHCAF pseudogene 3	0	2.11665	-2.89018	0.116236	0.93466	?	8	23634876	23635507	1						0
ENSG00000122420	PTGFR	prostaglandin F receptor	0	2.11665	-2.89312	0.110751	0.955652	?	1	78536431	78539749							1
ENSG00000142621	FHAD1	forkhead associated phosphopeptide binding domain 1	0	2.11665	-2.89818	0.102338	0.989961	?	1	15400097	15400283							1
ENSG00000129910	CDH15	cadherin 15	0.703749	6.23414	-2.93992	0.114999	0.939307	-3.14706	16	89195156	89195492							1
ENSG00000012171	SEMA3B	semaphorin 3B	0	2.38594	-2.95978	0.105304	0.977556	?	3	50276302	50276444							1
ENSG00000279461	AC005480.2	NA	0	2.38594	-2.9618	0.109453	0.960774	?	14	74003396	74003470		1					0
ENSG00000258780	BMS1P15	BMS1, ribosome biogenesis factor pseudogene 15	0	2.38594	-2.9623	0.110535	0.956499	?	15	20160651	20160826	1						0
ENSG00000260923	LINC02193	long intergenic non-protein coding RNA 2193	0	2.38594	-2.96493	0.116668	0.933049	?	16	90222389	90222508			1				0
ENSG00000250384	UBE2CP3	ubiquitin conjugating enzyme E2 C pseudogene 3	0.928736	6.42669	-2.96513	0.0624251	1.20464	-2.79074	4	57072683	57073132	1						0
ENSG00000185774	KCNIP4	potassium voltage-gated channel interacting protein 4	0	2.38594	-2.96904	0.127938	0.893	?	4	21729850	21730112							1
ENSG00000280434	AL031595.3	NA	0	2.38594	-2.97012	0.131321	0.881665	?	22	44139365	44153626		1					0
ENSG00000249031	SUMO2P6	SUMO2 pseudogene 6	0	2.38594	-2.97236	0.138978	0.857053	?	5	174561776	174562063	1						0
ENSG00000005108	THSD7A	thrombospondin type 1 domain containing 7A	0	2.38594	-2.97343	0.143012	0.844626	?	7	11636612	11636961							1
ENSG00000042781	USH2A	usherin	0	2.38594	-2.97376	0.144313	0.840694	?	1	216173946	216175237							1
ENSG00000018280	SLC11A1	solute carrier family 11 member 1	0	2.38594	-2.97423	0.146176	0.835125	?	2	218394120	218394186							1
ENSG00000064195	DLX3	distal-less homeobox 3	0	2.38594	-2.97428	0.146357	0.834585	?	17	49991335	49991516							1
ENSG00000269892	AC125494.2	NA	0	2.38594	-2.97529	0.150616	0.822129	?	12	6742985	6743641		1					0
ENSG00000225536	STIP1P3	stress induced phosphoprotein 1 pseudogene 3	0	2.38594	-2.97551	0.151559	0.819418	?	0	86084716	86086339	1						0
ENSG00000270076	AF131215.7	NA	0	2.38594	-2.9762	0.154637	0.810686	?	8	11202965	11203671		1					0
ENSG00000204301	NOTCH4	notch 4	0	2.38594	-2.97782	0.162395	0.789429	?	6	32215860	32217067							1
ENSG00000223714	AL109797.1	NA	0	2.38594	-2.97861	0.166465	0.778676	?	0	41276089	41276778		1					0
ENSG00000174951	FUT1	fucosyltransferase 1 (H blood group)	0	2.38594	-2.97954	0.171592	0.765504	?	19	48752612	48753122							1
ENSG00000134873	CLDN10	claudin 10	0	2.38594	-2.97985	0.173341	0.761099	?	13	95560468	95560938							1
ENSG00000187372	PCDHB13	protocadherin beta 13	0	2.38594	-2.97995	0.173939	0.759603	?	5	141216521	141218979							1
ENSG00000254432	AC113143.1	NA	0	2.38594	-2.98018	0.175301	0.756215	?	8	60808735	60808926		1					0
ENSG00000005471	ABCB4	ATP binding cassette subfamily B member 4	0	2.38594	-2.98058	0.177699	0.750316	?	7	87475466	87475471							1
ENSG00000214198	TTC41P	tetratricopeptide repeat domain 41, pseudogene	0	2.38594	-2.98092	0.179757	0.745314	?	12	103914962	103916083	1						0
ENSG00000126217	MCF2L	MCF.2 cell line derived transforming sequence like	1.4075	12.5841	-2.9819	0.0103518	1.98498	-3.1604	13	113096774	113098546							1
ENSG00000270638	AL023806.1	NA	0	2.38594	-2.98255	0.190508	0.720086	?	6	145735570	145737218		1					0
ENSG00000068976	PYGM	glycogen phosphorylase, muscle associated	0	2.38594	-2.98355	0.197769	0.703842	?	11	64753671	64753682							1
ENSG00000255107	AC079089.2	NA	0	2.38594	-2.98464	0.206301	0.685498	?	8	69859264	69860540		1					0
ENSG00000224358	AL451074.2	NA	0	2.38594	-2.98521	0.211011	0.675695	?	1	165773474	165775176		1					0
ENSG00000242608	RPS23P5	ribosomal protein S23 pseudogene 5	0	2.38594	-2.98531	0.211855	0.67396	?	5	13250235	13250662	1						0
ENSG00000246792	AC106038.1	NA	0	2.38594	-2.98668	0.224375	0.649025	?	8	90656514	90656598		1					0
ENSG00000273137	AL022328.2	NA	0	2.38594	-2.98782	0.235973	0.627137	?	22	50208461	50208769		1					0
ENSG00000243709	LEFTY1	left-right determination factor 1	0	2.38594	-2.98864	0.244979	0.61087	?	1	225887977	225888032							1
ENSG00000168010	ATG16L2	autophagy related 16 like 2	1.4075	11.6228	-2.99047	0.0100643	1.99722	-3.04575	11	72826703	72826734							1
ENSG00000262692	AC116914.2	NA	0	2.38594	-2.99098	0.274902	0.560822	?	17	3722389	3722488		1					0
ENSG00000271973	AC141002.1	NA	0	2.38594	-2.99178	0.286805	0.542413	?	3	48672455	48672733		1					0
ENSG00000232803	SLCO4A1-AS1	SLCO4A1 antisense RNA 1	0	2.3092	-2.99504	0.352219	0.453188	?	20	62663031	62663487							1
ENSG00000279115	AC006386.2	NA	0	2.38594	-3.00023	0.522385	0.28201	?	0	25307729	25307803		1					0
ENSG00000145242	EPHA5	EPH receptor A5	0	2.65523	-3.01736	0.0906445	1.04266	?	4	65330561	65331968							1
ENSG00000026508	CD44	CD44 molecule (Indian blood group)	0	2.65523	-3.03183	0.0974566	1.01119	?	11	35229334	35229789							1
ENSG00000081665	ZNF506	zinc finger protein 506	0	2.65523	-3.0338	0.0985196	1.00648	?	19	19820255	19820666							1
ENSG00000274536 #or# ENSG00000284567	AL034397.3	NA #or# microRNA 223	0.928736	7.04201	-3.04211	0.155996	0.806887	-2.92265	0	66018824	66020422		1					0
ENSG00000226273	AC079305.2	NA	0	2.65523	-3.05267	0.110761	0.955612	?	2	177177695	177178255		1					0
ENSG00000162804	SNED1	sushi, nidogen and EGF like domains 1	0	2.65523	-3.06118	0.117867	0.928609	?	2	241071796	241075605							1
ENSG00000124159	MATN4	matrilin 4	0	2.3092	-3.06365	0.149029	0.82673	?	20	45305583	45305616							1
ENSG00000111339	ART4	ADP-ribosyltransferase 4 (Dombrock blood group)	0	2.65523	-3.064	0.120493	0.91904	?	12	14840360	14840424							1
ENSG00000188779	SKOR1	SKI family transcriptional corepressor 1	0	2.65523	-3.08171	0.14122	0.850104	?	15	67833837	67834555							1
ENSG00000239272	RPL21P10	ribosomal protein L21 pseudogene 10	0	2.65523	-3.08713	0.149461	0.825473	?	14	77683202	77683573	1						0
ENSG00000214362	RPS3AP36	ribosomal protein S3a pseudogene 36	0	2.3092	-3.08922	0.11702	0.93174	?	10	95594598	95595372	1						0
ENSG00000154316	TDH	L-threonine dehydrogenase (pseudogene)	0	2.3092	-3.09245	0.113729	0.944129	?	8	11365583	11365801	1						0
ENSG00000215914	MMP23A	matrix metallopeptidase 23A (pseudogene)	0	2.65523	-3.09937	0.172887	0.762237	?	1	1701608	1701782	1						0
ENSG00000149380	P4HA3	prolyl 4-hydroxylase subunit alpha 3	0	2.65523	-3.09971	0.173621	0.760398	?	11	74285433	74285985							1
ENSG00000272933	AL391121.1	NA	0.703749	6.88854	-3.10346	0.0688317	1.16221	-3.29106	10	102642792	102644140		1					0
ENSG00000222020	AC062017.1	NA	0.928736	7.15782	-3.10955	0.0536439	1.27048	-2.94618	2	239402075	239402364		1					0
ENSG00000214961	FO393409.1	NA	0	2.65523	-3.11917	0.23449	0.629875	?	0	134272287	134273658		1					0
ENSG00000121410	A1BG	alpha-1-B glycoprotein	0	2.65523	-3.11924	0.234811	0.629282	?	19	58350594	58350651							1
ENSG00000281880 /// ENSG00000281880 #or# ENSG00000285283	PAUPAR	PAX6 upstream antisense RNA #or# NA /// PAX6 upstream antisense RNA	0.703749	7.15782	-3.12612	0.0498153	1.30264	-3.34639	11	31917339	31918339							1
ENSG00000125845	BMP2	bone morphogenetic protein 2	0.928736	7.42711	-3.13278	0.044586	1.3508	-2.99946	20	6779090	6780280							1
ENSG00000184731	FAM110C	family with sequence similarity 110 member C	0	2.65523	-3.13512	0.330663	0.480615	?	2	41221	41627							1
ENSG00000272183	AC005041.3	NA	0	2.57849	-3.13753	0.260083	0.584888	?	2	74501717	74502365		1					0
ENSG00000123892	RAB38	RAB38, member RAS oncogene family	0	2.57849	-3.14616	0.197656	0.704091	?	11	88113612	88113987							1
ENSG00000198974	MIR30E	microRNA 30e	0	2.65523	-3.14917	0.517378	0.286192	?	1	40754355	40754446				1			0
ENSG00000100985	MMP9	matrix metallopeptidase 9	0	2.57849	-3.15048	0.175228	0.756397	?	20	46016369	46016561							1
ENSG00000272078	AL139423.1	NA	0	2.57849	-3.15354	0.161827	0.79095	?	1	10647248	10654333		1					0
ENSG00000251470	ASNSP4	asparagine synthetase pseudogene 4	0	2.57849	-3.15467	0.157324	0.803204	?	8	46698479	46698688	1						0
ENSG00000275532	AC006449.2	NA	0	2.57849	-3.15787	0.145603	0.836831	?	17	38703480	38703757		1					0
ENSG00000145020 /// ENSG00000145020 #or# ENSG00000283189	AMT	aminomethyltransferase /// aminomethyltransferase #or# NA	0	2.57849	-3.16062	0.136686	0.864277	?	3	49421741	49422271							1
ENSG00000269886	AC022382.1	NA	0	2.57849	-3.16447	0.125654	0.900823	?	3	9812762	9813097		1					0
ENSG00000271555	AC113139.1	NA	0	2.57849	-3.17152	0.108994	0.962597	?	8	52722903	52723141		1					0
ENSG00000132821	VSTM2L	V-set and transmembrane domain containing 2 like	0	2.57849	-3.17355	0.10488	0.979309	?	20	37903142	37903350							1
ENSG00000244705	AC020658.1	NA	0	2.92452	-3.17546	0.120329	0.91963	?	15	40312352	40313289		1					0
ENSG00000253392	AC119403.1	NA	0	2.57849	-3.17612	0.100055	0.99976	?	19	2915146	2915708		1					0
ENSG00000280129	AL132780.5	NA	0	2.57849	-3.17711	0.0982992	1.00745	?	14	23005499	23007123		1					0
ENSG00000246985	SOCS2-AS1	SOCS2 antisense RNA 1	0	2.57849	-3.18797	0.0820393	1.08598	?	12	93565584	93565744							1
ENSG00000244219	TMEM225B	transmembrane protein 225B	0.703749	7.35038	-3.19826	0.0411809	1.3853	-3.38469	7	99605464	99605559							1
ENSG00000250746	AC105250.1	NA	0	2.92452	-3.20892	0.152882	0.815643	?	4	164188311	164190367		1					0
ENSG00000227361	RPS24P7	ribosomal protein S24 pseudogene 7	0	2.92452	-3.25114	0.246712	0.60781	?	2	61803143	61803388	1						0
ENSG00000188906	LRRK2	leucine rich repeat kinase 2	0	2.84778	-3.25382	0.0618624	1.20857	?	12	40367766	40368879							1
ENSG00000204314	PRRT1	proline rich transmembrane protein 1	0	2.84778	-3.25491	0.0769826	1.11361	?	6	32148359	32149221							1
ENSG00000229241	PNPT1P1	polyribonucleotide nucleotidyltransferase 1 pseudogene 1	0	2.84778	-3.25566	0.0926699	1.03306	?	3	3981981	3984295	1						0
ENSG00000220105	AL353151.1	NA	0	2.84778	-3.25571	0.0940933	1.02644	?	9	4781475	4782078		1					0
ENSG00000261423	TMEM202-AS1	TMEM202 antisense RNA 1	0	2.84778	-3.25584	0.0976251	1.01044	?	15	72472844	72475168							1
ENSG00000215278	RPS7P6	ribosomal protein S7 pseudogene 6	0	2.84778	-3.25695	0.141848	0.848178	?	4	17427696	17428274	1						0
ENSG00000152292	SH2D6	SH2 domain containing 6	0	2.84778	-3.25792	0.225586	0.646688	?	2	85436466	85436738							1
ENSG00000156968	MPV17L	MPV17 mitochondrial inner membrane protein like	0	2.84778	-3.25891	0.500559	0.300544	?	16	15407933	15408118							1
ENSG00000236140	AC245014.1	NA	0	3.11707	-3.32385	0.070362	1.15266	?	1	145286610	145286870		1					0
ENSG00000182676	PPP1R27	protein phosphatase 1 regulatory subunit 27	0	3.11707	-3.33165	0.0788015	1.10347	?	17	81833498	81834498							1
ENSG00000253730	AC015909.2	NA	0	3.11707	-3.33476	0.0828666	1.08162	?	17	50158333	50158623		1					0
ENSG00000278627	AC005962.1	NA	0	3.11707	-3.33722	0.0864412	1.06328	?	17	58202352	58203003		1					0
ENSG00000261136	AC023908.3	NA	0	3.11707	-3.34092	0.0924775	1.03396	?	15	39782571	39785617		1					0
ENSG00000069535	MAOB	monoamine oxidase B	0	3.11707	-3.34227	0.094924	1.02262	?	0	43843800	43843934							1
ENSG00000130656	HBZ	hemoglobin subunit zeta	0	3.11707	-3.34784	0.106631	0.972117	?	16	154401	154503							1
ENSG00000233547	AL158212.2	NA	0	3.11707	-3.35304	0.12059	0.918689	?	10	112950646	112951007		1					0
ENSG00000233967	AL359715.1	NA	0	3.11707	-3.35447	0.125121	0.902671	?	6	80462872	80463207		1					0
ENSG00000235872	AC078777.1	NA	0	3.11707	-3.35867	0.140501	0.852321	?	12	67658991	67659584		1					0
ENSG00000283450	MIR486-2	microRNA 486-2	0	3.11707	-3.36498	0.171956	0.764583	?	8	41660444	41660507				1			0
ENSG00000240388	AC008799.1	NA	0	3.38636	-3.38945	0.0626692	1.20295	?	5	91354478	91354934		1					0
ENSG00000179284	DAND5	DAN domain BMP antagonist family member 5	0	3.04033	-3.41097	0.086201	1.06449	?	19	12973635	12974762							1
ENSG00000172738	TMEM217	transmembrane protein 217	0	3.04033	-3.4139	0.0813085	1.08986	?	6	37218170	37219041							1
ENSG00000129226	CD68	CD68 molecule	0	3.38636	-3.41619	0.0772904	1.11187	?	17	7581096	7581622							1
ENSG00000232021	LEF1-AS1	LEF1 antisense RNA 1	0	3.04033	-3.41647	0.0773809	1.11137	?	4	108256645	108256836							1
ENSG00000145217	SLC26A1	solute carrier family 26 member 1	0	3.04033	-3.41762	0.0757298	1.12073	?	4	990621	990817							1
ENSG00000269694	AC005197.1	NA	0	3.38636	-3.41888	0.0792798	1.10084	?	19	18883087	18883376		1					0
ENSG00000144847	IGSF11	immunoglobulin superfamily member 11	0	3.04033	-3.4209	0.0713396	1.14667	?	3	118948320	118948384							1
ENSG00000251568	ALG3P1	ALG3, alpha-1,3- mannosyltransferase pseudogene 1	0	3.04033	-3.42306	0.0686611	1.16329	?	5	5375723	5376836	1						0
ENSG00000260326	PHBP21	prohibitin pseudogene 21	0	3.30962	-3.48798	0.0838093	1.07671	?	16	52934813	52935635	1						0
ENSG00000261428	AC097461.1	NA	0	3.30962	-3.48844	0.080423	1.09462	?	2	222566899	222569719		1					0
ENSG00000283057	AC010653.3	NA	0	3.30962	-3.48942	0.0738749	1.1315	?	16	71777603	71777834		1					0
ENSG00000170961	HAS2	hyaluronan synthase 2	0	3.30962	-3.49008	0.0699628	1.15513	?	8	121612116	121614108							1
ENSG00000213452	AKR1B1P2	aldo-keto reductase family 1 member B1 pseudogene 2	0	3.30962	-3.4929	0.056947	1.24453	?	3	74135959	74136892	1						0
ENSG00000223984	HNRNPRP1	heterogeneous nuclear ribonucleoprotein R pseudogene 1	0	3.30962	-3.4944	0.051773	1.2859	?	10	21624592	21626286	1						0
ENSG00000250917 /// ENSG00000101444 #or# ENSG00000250917	AL035458.2	adenosylhomocysteinase #or# NA /// NA	0	3.30962	-3.49456	0.0512781	1.29007	?	20	34234840	34235030		1					0
ENSG00000161405	IKZF3	IKAROS family zinc finger 3	0	3.30962	-3.49464	0.051027	1.2922	?	17	39864127	39864127							1
ENSG00000003987	MTMR7	myotubularin related protein 7	0	3.30962	-3.50131	0.036386	1.43907	?	8	17372995	17373240							1
ENSG00000185482	STAC3	SH3 and cysteine rich domain 3	0	3.23288	-3.52746	0.0926832	1.033	?	12	57249019	57249308							1
ENSG00000254473	AL354920.1	NA	0	3.57891	-3.55149	0.0447319	1.34938	?	9	83712498	83713378		1					0
ENSG00000269463	AP001160.4	NA	0	3.57891	-3.55581	0.0506596	1.29534	?	11	62807682	62808063		1					0
ENSG00000099840	IZUMO4	IZUMO family member 4	0	3.57891	-3.5691	0.0868508	1.06123	?	19	2099255	2099588							1
ENSG00000199072	MIRLET7F1	microRNA let-7f-1	0	3.57891	-3.57304	0.109398	0.960991	?	9	94176347	94176433				1			0
ENSG00000215006	CHCHD2P2	coiled-coil-helix-coiled-coil-helix domain containing 2 pseudogene 2	0	3.8482	-3.60492	0.0399552	1.39843	?	5	69333929	69334249	1						0
ENSG00000277954	AC092376.2	NA	0	3.8482	-3.63092	0.0555778	1.2551	?	16	79202624	79206739		1					0
ENSG00000223692	DIP2A-IT1	DIP2A intronic transcript 1	0	3.8482	-3.64174	0.0673712	1.17153	?	21	46469146	46469306							1
ENSG00000079101 /// ENSG00000079101 #or# ENSG00000266456	CLUL1	clusterin like 1 /// clusterin like 1 #or# NA	0	4.11749	-3.64473	0.0337948	1.47115	?	18	649931	650175							1
ENSG00000277597	AC130343.2	NA	0	3.77146	-3.69428	0.042723	1.36934	?	17	1684726	1685151		1					0
ENSG00000259803	SLC22A31	solute carrier family 22 member 31	0	3.77146	-3.69452	0.0423048	1.37361	?	16	89199412	89199655							1
ENSG00000159387	IRX6	iroquois homeobox 6	0	3.77146	-3.70144	0.0328588	1.48335	?	16	55327586	55327796							1
ENSG00000257135	AC007249.2	NA	0	4.11749	-3.7101	0.057008	1.24406	?	2	10450436	10450794		1					0
ENSG00000156466	GDF6	growth differentiation factor 6	0	4.04075	-3.74846	0.0271126	1.56683	?	8	96144525	96144654							1
ENSG00000270147	AC068620.2	NA	0	4.04075	-3.75262	0.0382308	1.41759	?	4	56396312	56396871		1					0
ENSG00000273711	AC005520.5	NA	0	4.04075	-3.75374	0.0430632	1.36589	?	14	73885392	73885555		1					0
ENSG00000231991	ANXA2P2	annexin A2 pseudogene 2	0	4.31004	-3.78886	0.0241458	1.61716	?	9	33624274	33625293	1						0
ENSG00000159640	ACE	angiotensin I converting enzyme	0	3.96401	-3.79555	0.05224	1.282	?	17	63496798	63496985							1
ENSG00000139211	AMIGO2	adhesion molecule with Ig like domain 2	0	4.31004	-3.80036	0.0289049	1.53903	?	12	47076600	47077433							1
ENSG00000185261	KIAA0825	KIAA0825	0	3.96401	-3.80355	0.0439727	1.35682	?	5	94519206	94520242							1
ENSG00000274798	AC025166.1	NA	0	4.31004	-3.81127	0.0361654	1.44171	?	15	40874433	40874595		1					0
ENSG00000237972	TUBG1P	tubulin gamma 1 pseudogene	0	4.31004	-3.81282	0.0375483	1.42541	?	7	43918697	43920054	1						0
ENSG00000049089	COL9A2	collagen type IX alpha 2 chain	0	3.96401	-3.81388	0.0361027	1.44246	?	1	40315393	40315664							1
ENSG00000188897	AC099489.1	NA	0	4.31004	-3.81541	0.0401237	1.3966	?	16	11450701	11450820		1					0
ENSG00000256124	LINC01152	long intergenic non-protein coding RNA 1152	0	4.31004	-3.81958	0.0451271	1.34556	?	17	72038005	72041297			1				0
ENSG00000270956 /// ENSG00000237298 #or# ENSG00000270956	AC009948.4	NA /// TTN antisense RNA 1 #or# NA	0	3.96401	-3.84952	0.0213041	1.67154	?	2	178541125	178541799		1					0
ENSG00000259826	AC072061.1	NA	0	4.2333	-3.86484	0.0384838	1.41472	?	7	39947522	39949755		1					0
ENSG00000196660	SLC30A10	solute carrier family 30 member 10	0	4.2333	-3.86631	0.036381	1.43912	?	1	219915154	219915448							1
ENSG00000214552	COPS8P2	COP9 signalosome subunit 8 pseudogene 2	0	4.2333	-3.86768	0.0345969	1.46096	?	3	68145004	68145630	1						0
ENSG00000260160	AC011468.1	NA	0	4.2333	-3.8768	0.0258564	1.58743	?	19	52058490	52059107		1					0
ENSG00000272040	AC010245.2	NA	0	4.2333	-3.88249	0.0222252	1.65316	?	5	75608817	75609983		1					0
ENSG00000272030	AL162258.2	NA	0	4.50259	-3.92345	0.0287494	1.54137	?	1	153631661	153631825		1					0
ENSG00000227437	RPS8P4	ribosomal protein S8 pseudogene 4	0	4.50259	-3.92447	0.0207163	1.68369	?	10	119638456	119639082	1						0
ENSG00000092969 #or# ENSG00000281453 /// ENSG00000092969	TGFB2	transforming growth factor beta 2 #or# TGFB2 overlapping transcript 1 /// transforming growth factor beta 2	0	4.50259	-3.92509	0.0177226	1.75147	?	1	218441204	218442141							1
ENSG00000186231	KLHL32	kelch like family member 32	0	4.84862	-3.945	0.0375526	1.42536	?	6	97113920	97114179							1
ENSG00000180539	C9orf139	chromosome 9 open reading frame 139	0	4.69514	-4.0417	0.0160768	1.7938	?	9	137037614	137037955							1
ENSG00000139597 /// ENSG00000139597 #or# ENSG00000270008	N4BP2L1	NEDD4 binding protein 2 like 1 /// NEDD4 binding protein 2 like 1 #or# NA	0	4.96443	-4.0847	0.0114622	1.94073	?	13	32424922	32425828							1
ENSG00000225976	CKS1BP2	CDC28 protein kinase regulatory subunit 1B pseudogene 2	0	4.8877	-4.11841	0.0207886	1.68217	?	10	29697935	29698174	1						0
ENSG00000181291	TMEM132E	transmembrane protein 132E	0	5.50301	-4.16494	0.0157409	1.80297	?	17	34637177	34637506							1
ENSG00000178726	THBD	thrombomodulin	0	5.57975	-4.17816	0.0445577	1.35108	?	20	23045633	23047776							1
ENSG00000261087	AP003469.4	NA	0	5.69556	-4.25547	0.0118939	1.92468	?	8	101166805	101169629		1					0
ENSG00000232059	AL451007.1	NA	0	6.23414	-4.33327	0.0104471	1.981	?	1	244694432	244694720		1					0
ENSG00000214456	PLIN5	perilipin 5	0	6.15741	-4.37764	0.0113794	1.94388	?	19	4533249	4533897							1
ENSG00000130477	UNC13A	unc-13 homolog A	0	7.00435	-4.6133	0.00824776	2.08366	?	19	17626288	17626785							1
ENSG00000120675	DNAJC15	DnaJ heat shock protein family (Hsp40) member C15	0	8.08151	-4.74889	0.00264431	2.57769	?	13	43107249	43114224							1
ENSG00000264066 #or# ENSG00000284565	MIR451A	NA #or# microRNA 451a	0	17.3169	-5.8555	0.00917534	2.03738	?	17	28861369	28861440				1			0
