# Supplementary material for: MLL-AF4 and a murinized pSer-variant thereof are turning on the nucleolar stress pathway
Source: Cell Biosci. 2022 Apr 25;12:47. doi: 10.1186/s13578-022-00781-y (PMC9036721; doi:10.1186/s13578-022-00781-y)
Supplement: Supplementary file 5 — Additional file 5: MA4m_A4M gene signature. [file 13578_2022_781_MOESM5_ESM.xlsx]

## Sheet: Sheet1
ID	gene symbol	gene name	mean exp	mean Mock	log2	pvalue	minus log 10	log2 rolf	chrom	Anfang	Ende	PG	NA	LINC	MIR	SNO	MT	ProCodG
ENSG00000274997	HIST1H2AH	histone cluster 1 H2A family member h	5.62793	0	4.72901	0.00279465	2.55367	?	6	27147513	27147515							1
ENSG00000270487	AL355297.2	NA	4.30948	0	4.36293	0.0144786	1.83927	?	6	156780327	156780455		1					0
ENSG00000176928	GCNT4	glucosaminyl (N-acetyl) transferase 4, core 2	4.30752	0	4.32271	0.00725826	2.13917	?	5	75025346	75028675							1
ENSG00000213285	RPL23AP45	ribosomal protein L23a pseudogene 45	3.85005	0	4.05945	0.0298872	1.52451	?	5	181471963	181472430	1						0
ENSG00000260014	LSM3P5	LSM3 homolog, U6 small nuclear RNA and mRNA degradation associated pseudogene 5	3.65687	0	4.03857	0.0152154	1.81772	?	16	78355529	78355834	1						0
ENSG00000258314	AL589182.1	NA	3.49421	0	3.97256	0.0228372	1.64136	?	14	19055390	19055551		1					0
ENSG00000228150	AL357140.2	NA	3.1728	0	3.96394	0.0160104	1.7956	?	1	9949638	9949974		1					0
ENSG00000171885	AQP4	aquaporin 4	3.26846	0	3.94933	0.0238685	1.62218	?	18	26861254	26861295							1
ENSG00000178033	CALHM5	calcium homeostasis modulator family member 5	3.32199	0	3.91285	0.0248582	1.60453	?	6	116515990	116524792							1
ENSG00000203780	FANK1	fibronectin type III and ankyrin repeat domains 1	3.16129	0	3.89708	0.0312595	1.50502	?	10	126009054	126009590							1
ENSG00000162390	ACOT11	acyl-CoA thioesterase 11	3.03119	0	3.89371	0.0204568	1.68916	?	1	54599296	54599658							1
ENSG00000230626	AC011005.1	NA	3.17084	0	3.87789	0.035787	1.44627	?	7	129130749	129130793		1					0
ENSG00000151224	MAT1A	methionine adenosyltransferase 1A	3.21287	0	3.87153	0.116611	0.93326	?	10	80276520	80276594							1
ENSG00000105877	DNAH11	dynein axonemal heavy chain 11	3.04074	0	3.85886	0.0243121	1.61418	?	7	21901007	21901116							1
ENSG00000280832	GSEC	G-quadruplex forming sequence containing lncRNA	7.8152	0.73113	3.77375	0.00987286	2.00556	3.41808	11	126350172	126351777							1
ENSG00000236914	LINC01852	long intergenic non-protein coding RNA 1852	2.99666	0	3.76257	0.0590724	1.22862	?	15	38072018	38072959			1				0
ENSG00000182791	CCDC87	coiled-coil domain containing 87	3.08277	0	3.75379	0.0288677	1.53959	?	11	66590176	66590465							1
ENSG00000119703	ZC2HC1C	zinc finger C2HC-type containing 1C	2.83596	0	3.72017	0.0324156	1.48925	?	14	75077532	75077819							1
ENSG00000175084	DES	desmin	2.77091	0	3.70489	0.072416	1.14017	?	2	219425949	219426184							1
ENSG00000279457	FO538757.1	NA	2.84551	0	3.70002	0.0488477	1.31116	?	1	185217	185350		1					0
ENSG00000229037	BX323845.3	NA	2.78046	0	3.68178	0.03947	1.40373	?	0	53808389	53808623		1					0
ENSG00000260743	AC007823.1	NA	2.6733	0	3.62261	0.0471042	1.32694	?	3	179340322	179341887		1					0
ENSG00000183066	WBP2NL	WBP2 N-terminal like	2.60825	0	3.61126	0.0538772	1.26859	?	22	42032631	42032931							1
ENSG00000243759	ST13P15	ST13, Hsp70 interacting protein pseudogene 15	2.60629	0	3.52339	0.0549279	1.26021	?	3	143517123	143518229	1						0
ENSG00000232388 #or# ENSG00000284776	AL121900.2	small integral membrane protein 26 #or# NA	6.76266	0.73113	3.51529	0.0187769	1.72638	3.20939	20	18567453	18567478		1					0
ENSG00000123360	PDE1B	phosphodiesterase 1B	2.29639	0	3.51279	0.0809186	1.09195	?	12	54577225	54577236							1
ENSG00000265148	TSPOAP1-AS1	TSPOAP1 antisense RNA 1	2.28488	0	3.47789	0.0687431	1.16277	?	17	58351999	58353287							1
ENSG00000272767	JMJD1C-AS1	JMJD1C antisense RNA 1	6.50434	0.73113	3.47268	0.0216677	1.66419	3.1532	10	63465229	63466563							1
ENSG00000280353	AC011466.4	NA	6.33213	0.461841	3.47181	0.0196622	1.70637	3.77722	19	48198107	48199720		1					0
ENSG00000250329	KDELC1P1	KDEL motif containing 1 pseudogene 1	2.45514	0	3.4603	0.0509052	1.29324	?	5	128109486	128110994	1						0
ENSG00000100276	RASL10A	RAS like family 10 member A	2.49912	0	3.44265	0.0545562	1.26316	?	22	29313535	29313987							1
ENSG00000163075	CFAP221	cilia and flagella associated protein 221	2.22939	0	3.44258	0.0612827	1.21266	?	2	119656362	119656660							1
ENSG00000167912	AC090152.1	NA	2.42257	0	3.42693	0.108649	0.963975	?	8	59120336	59121315		1					0
ENSG00000235546	AC087499.4	NA	2.20833	0	3.42372	0.0492281	1.30779	?	17	20612667	20614008		1					0
ENSG00000236991	EDRF1-AS1	EDRF1 antisense RNA 1	2.27337	0	3.42184	0.0775641	1.11034	?	10	125748815	125749240							1
ENSG00000060140	STYK1	serine/threonine/tyrosine kinase 1	2.20833	0	3.41325	0.0645693	1.18997	?	12	10634619	10634686							1
ENSG00000271746	AL031848.2	NA	2.28292	0	3.40327	0.130822	0.88332	?	1	6393555	6394391		1					0
ENSG00000242479	AC109992.1	NA	2.21788	0	3.37832	0.0851092	1.07002	?	3	142450102	142452149		1					0
ENSG00000232499	AL391058.1	NA	2.21788	0	3.37722	0.0714745	1.14585	?	1	113449700	113450728		1					0
ENSG00000251079 #or# ENSG00000254929 /// ENSG00000251079	BMS1P2	BMS1, ribosome biogenesis factor pseudogene 2 #or# NA /// BMS1, ribosome biogenesis factor pseudogene 2	2.33646	0	3.36358	0.0974769	1.0111	?	10	47540077	47540183	1						0
ENSG00000263843	AC022211.2	NA	2.20637	0	3.3022	0.0721266	1.1419	?	17	75273412	75273722		1					0
ENSG00000125409	TEKT3	tektin 3	2.18531	0	3.30072	0.116642	0.933145	?	17	15331586	15331614							1
ENSG00000143502	SUSD4	sushi domain containing 4	5.25103	0.461841	3.29843	0.0275631	1.55967	3.50713	1	223358825	223359121							1
ENSG00000244649	LINC02086	long intergenic non-protein coding RNA 2086	2.04566	0	3.28444	0.100696	0.996988	?	17	48706059	48707346			1				0
ENSG00000188613	NANOS1	nanos C2HC-type zinc finger 1	416.266	41.7554	3.27519	2.1361e-64	63.6704	3.31747	10	119030681	119031533		1					0
ENSG00000272156	AC008280.3	NA	2.12026	0	3.26966	0.0948961	1.02275	?	2	54084570	54085066		1					0
ENSG00000270557	AC013731.1	NA	2.12026	0	3.25992	0.0793968	1.1002	?	2	157877683	157878565		1					0
ENSG00000260461	AL133355.1	NA	2.1738	0	3.2332	0.112043	0.950615	?	10	103877374	103879761		1					0
ENSG00000229752	RPL7P10	ribosomal protein L7 pseudogene 10	2.03415	0	3.22341	0.110764	0.9556	?	1	81098267	81099005	1						0
ENSG00000279623	AL359697.1	NA	2.03415	0	3.20905	0.0757938	1.12037	?	10	21865335	21865921		1					0
ENSG00000234380	LINC01426	long intergenic non-protein coding RNA 1426	2.10875	0	3.19728	0.100501	0.99783	?	21	34747781	34748367			1				0
ENSG00000263155	MYZAP	myocardial zonula adherens protein	2.01309	0	3.17761	0.0866773	1.06209	?	15	57684423	57684791							1
ENSG00000123407	HOXC12	homeobox C12	4.72851	0.461841	3.03562	0.0534436	1.2721	3.35592	12	53956567	53958956							1
ENSG00000204389	HSPA1A	heat shock protein family A (Hsp70) member 1A	8.7587	1.19297	3.01369	0.00867101	2.06193	2.87616	6	31817683	31817946							1
ENSG00000116329	OPRD1	opioid receptor delta 1	4.6424	0.73113	2.98037	0.0487402	1.31211	2.66667	1	28812142	28812383							1
ENSG00000183281	PLGLB1	plasminogen-like B1	4.31903	0.461841	2.94992	0.0691402	1.16027	3.22524	2	87015652	87015949							1
ENSG00000280441	FP236383.1	NA	58.3176	7.54293	2.91968	4.95184e-11	10.3052	2.95073	21	8410179	8410645		1					0
ENSG00000074527	NTN4	netrin 4	4.08177	0.461841	2.90635	0.0629615	1.20092	3.14373	12	95787413	95787468							1
ENSG00000281404	LINC01176	long intergenic non-protein coding RNA 1176	4.54283	0.461841	2.9003	0.0662343	1.17892	3.29812	7	30412331	30412375			1				0
ENSG00000264940	SNORD3C	small nucleolar RNA, C/D box 3C	4.01673	0.73113	2.86215	0.0670649	1.1735	2.45782	17	19190029	19190245					1		0
ENSG00000143217	NECTIN4	nectin cell adhesion molecule 4	3.91911	0.461841	2.84841	0.0609062	1.21534	3.08506	1	161072140	161072885							1
ENSG00000178301	AQP11	aquaporin 11	7.97786	1.19297	2.83645	0.0120773	1.91803	2.74144	11	77609378	77610355							1
ENSG00000250999	AC136604.3	NA	4.30557	0.73113	2.8139	0.0796233	1.09896	2.558	5	179664323	179664430		1					0
ENSG00000183246	RIMBP3C	RIMS binding protein 3C	3.97069	0.461841	2.73385	0.0850029	1.07057	3.10392	22	21545678	21546056							1
ENSG00000137440	FGFBP1	fibroblast growth factor binding protein 1	3.91715	0.73113	2.73348	0.0815001	1.08884	2.4216	4	15935569	15935927							1
ENSG00000237512	UNC5B-AS1	UNC5B antisense RNA 1	3.81953	0.461841	2.71581	0.0980801	1.00842	3.04793	10	71217224	71217635							1
ENSG00000244490	RWDD4P1	RWD domain containing 4 pseudogene 1	3.89413	0.461841	2.70936	0.104935	0.97908	3.07583	7	105301522	105302086	1						0
ENSG00000270182	AC004080.4	NA	3.49812	0.73113	2.65518	0.0965391	1.0153	2.25838	7	27158344	27158976		1					0
ENSG00000143450 #or# ENSG00000232937 /// ENSG00000143450	OAZ3	ornithine decarboxylase antizyme 3 #or# NA /// ornithine decarboxylase antizyme 3	7.62756	1.46226	2.63489	0.0216049	1.66545	2.38302	1	151771220	151771330							1
ENSG00000154856	APCDD1	APC down-regulated 1	7.07648	0.923681	2.63457	0.0254902	1.59363	2.93756	18	10487590	10487814							1
ENSG00000278996	FP671120.1	NA	52.8578	8.19732	2.58199	2.43398e-09	8.61368	2.68889	21	8227180	8227646		1					0
ENSG00000267390	AC036176.1	NA	3.59182	0.73113	2.58078	0.109213	0.961724	2.29652	18	63381377	63381629		1					0
ENSG00000118690	ARMC2	armadillo repeat containing 2	3.50572	0.73113	2.55464	0.112879	0.947387	2.26151	6	108964980	108965117							1
ENSG00000245482	AC046130.1	NA	3.73147	0.73113	2.54901	0.101003	0.995667	2.35154	12	34022281	34024134		1					0
ENSG00000268140	PCGF7P	polycomb group ring finger 7 pseudogene	3.3335	0.461841	2.54339	0.101858	0.992007	2.85157	19	22137931	22138981	1						0
ENSG00000232177	MTND4P24	mitochondrially encoded NADH:ubiquinone oxidoreductase core subunit 4 pseudogene 24	6.84118	1.46226	2.53802	0.0361231	1.44222	2.22604	0	126472885	126473281	1						0
ENSG00000284862 /// as__ENSG00000145075 /// ENSG00000145075 /// ENSG00000145075 #or# ENSG00000284862	CCDC39	coiled-coil domain containing 39 #or# coiled-coil domain containing 39 /// coiled-coil domain containing 39	3.47315	0.461841	2.53064	0.118914	0.924766	2.91078	3	180614588	180614920							1
ENSG00000269800	PLEKHA3P1	pleckstrin homology domain containing A3 pseudogene 1	3.24739	0.461841	2.52537	0.136479	0.864933	2.81382	19	41521043	41521787	1						0
ENSG00000182103	FAM181B	family with sequence similarity 181 member B	3.34305	0.461841	2.52353	0.125722	0.900588	2.8557	11	82729941	82732448							1
ENSG00000135917	SLC19A3	solute carrier family 19 member 3	3.19386	0.73113	2.52096	0.116586	0.933355	2.1271	2	227701607	227702320							1
ENSG00000207264	RNU6-15P	RNA, U6 small nuclear 15, pseudogene	3.08669	0.461841	2.51453	0.130281	0.885117	2.74059	10	21321961	21322067	1						0
ENSG00000111846	GCNT2	glucosaminyl (N-acetyl) transferase 2 (I blood group)	2.9566	0.461841	2.51358	0.117761	0.928997	2.67847	6	10626608	10629368							1
ENSG00000283545 /// ENSG00000283414 /// ENSG00000283575 /// ENSG00000283418	RF00026	NA	3.27801	0.461841	2.51332	0.122597	0.911521	2.82735	1	180758722	180758817		1					0
ENSG00000227425	MRPS21P2	mitochondrial ribosomal protein S21 pseudogene 2	3.33154	0.461841	2.50155	0.156158	0.806435	2.85072	1	157861197	157861460	1						0
ENSG00000234386	OR7E162P	olfactory receptor family 7 subfamily E member 162 pseudogene	3.26846	0.73113	2.49524	0.122583	0.91157	2.16041	4	3901566	3902594	1						0
ENSG00000175793	SFN	stratifin	3.24544	0.461841	2.47021	0.163491	0.786507	2.81295	1	26863960	26864457							1
ENSG00000134853	PDGFRA	platelet derived growth factor receptor alpha	3.17084	0.461841	2.46767	0.137915	0.860388	2.7794	4	54281581	54281977							1
ENSG00000243753	HLA-L	major histocompatibility complex, class I, L (pseudogene)	3.23588	0.461841	2.45537	0.113971	0.943205	2.80869	6	30261587	30261703	1						0
ENSG00000267249	AP005482.3	NA	2.93554	0.73113	2.44168	0.130236	0.885271	2.00542	18	12670426	12671145		1					0
ENSG00000083828	ZNF586	zinc finger protein 586	2.94509	0.73113	2.44133	0.113425	0.945292	2.01011	19	57779348	57780544							1
ENSG00000269489	AL589765.6	NA	3.09428	0.461841	2.41747	0.160305	0.795052	2.74414	1	151798054	151798602		1					0
ENSG00000161328	LRRC56	leucine rich repeat containing 56	3.09428	0.461841	2.40772	0.148143	0.82932	2.74414	11	554277	554916							1
ENSG00000215246	AC116351.1	NA	3.09428	0.461841	2.40569	0.145946	0.835808	2.74414	5	987180	990623		1					0
ENSG00000213590	AL807752.1	NA	2.85898	0.73113	2.38138	0.141528	0.849158	1.9673	9	136935840	136937161		1					0
ENSG00000180089	TMEM86B	transmembrane protein 86B	3.07322	0.461841	2.37959	0.147474	0.831286	2.73428	19	55226751	55228784							1
ENSG00000273679	AC100757.1	NA	5.78864	0.923681	2.37402	0.0582317	1.23484	2.64776	15	22371736	22373570		1					0
ENSG00000278558	TMEM191B	transmembrane protein 191B	9.08761	1.65481	2.36523	0.0214631	1.66831	2.45723	22	18530457	18530459							1
ENSG00000240125	RPL23AP75	ribosomal protein L23a pseudogene 75	2.99862	0.73113	2.36302	0.140033	0.85377	2.0361	17	40439467	40439917	1						0
ENSG00000273447	AC004067.1	NA	3.14782	0.461841	2.35525	0.155381	0.808603	2.76889	4	109692004	109692703		1					0
ENSG00000259295	CSPG4P12	chondroitin sulfate proteoglycan 4 pseudogene 12	2.79393	0.73113	2.34986	0.161954	0.790607	1.9341	15	85207702	85213905	1						0
ENSG00000179023	KLHDC7A	kelch domain containing 7A	2.85702	0.461841	2.34217	0.174862	0.757305	2.62904	1	18483316	18486126							1
ENSG00000215788	TNFRSF25	TNF receptor superfamily member 25	5.76954	1.19297	2.33985	0.0681418	1.16659	2.2739	1	6464567	6464719							1
ENSG00000231738	TSPAN19	tetraspanin 19	5.53032	0.923681	2.33101	0.0684655	1.16453	2.5819	12	85029947	85029973							1
ENSG00000273897	AC211476.3	NA	2.77091	0.461841	2.3164	0.246164	0.608775	2.58489	7	73049150	73049246		1					0
ENSG00000278570	NR2E3	nuclear receptor subfamily 2 group E member 3	2.77091	0.461841	2.30972	0.189806	0.72169	2.58489	15	71818214	71818248							1
ENSG00000269038	AP001462.1	NA	5.51881	0.923681	2.30167	0.0712096	1.14746	2.57889	11	64778954	64779405		1					0
ENSG00000233901	LINC01503	long intergenic non-protein coding RNA 1503	2.70587	0.461841	2.29829	0.233979	0.630823	2.55062	9	129359336	129359538			1				0
ENSG00000111328	CDK2AP1	cyclin dependent kinase 2 associated protein 1	3.08277	0.73113	2.29757	0.169486	0.770865	2.07603	12	123267254	123267282							1
ENSG00000213820	RPL13P2	ribosomal protein L13 pseudogene 2	5.31608	1.19297	2.29506	0.0573115	1.24176	2.1558	20	46099518	46100176	1						0
ENSG00000227617	CERS6-AS1	CERS6 antisense RNA 1	2.85702	0.73113	2.29453	0.146559	0.833987	1.96631	2	168783139	168783471							1
ENSG00000188596	CFAP54	cilia and flagella associated protein 54	2.91056	0.461841	2.29286	0.176767	0.752599	2.65583	12	96765077	96765270							1
ENSG00000218980	FTH1P15	ferritin heavy chain 1 pseudogene 15	2.84551	0.461841	2.28521	0.179678	0.745505	2.62322	6	57004520	57004799	1						0
ENSG00000189050 #or# ENSG00000267104	TBC1D3P1-DHX40P1	ring finger protein, transmembrane 1 #or# TBC1D3P1-DHX40P1 readthrough, transcribed pseudogene	2.98516	0.461841	2.28135	0.188431	0.724847	2.69234	17	59962363	59962616	1						0
ENSG00000204257	HLA-DMA	major histocompatibility complex, class II, DM alpha	11.2403	2.11665	2.26438	0.015864	1.79959	2.40883	6	32950084	32950803							1
ENSG00000233057	EEF1A1P14	eukaryotic translation elongation factor 1 alpha 1 pseudogene 14	2.69436	0.461841	2.23305	0.168984	0.772153	2.54447	1	194188967	194190342	1						0
ENSG00000200488	RN7SKP203	RNA, 7SK small nuclear pseudogene 203	8.07156	1.65481	2.23199	0.0335519	1.47428	2.28618	2	76445079	76445410	1						0
ENSG00000282386	AL358472.4	NA	2.53365	0.461841	2.22932	0.20468	0.688924	2.45575	1	153964361	153965070		1					0
ENSG00000182747	SLC35D3	solute carrier family 35 member D3	2.53365	0.73113	2.22498	0.151402	0.81987	1.79302	6	136924697	136925639							1
ENSG00000136960	ENPP2	ectonucleotide pyrophosphatase/phosphodiesterase 2	2.84551	0.73113	2.22274	0.164424	0.784034	1.96049	8	119616269	119616384							1
ENSG00000222009	BTBD19	BTB domain containing 19	2.70587	0.73113	2.22034	0.208054	0.681824	1.88789	1	44813638	44814099							1
ENSG00000114656	KIAA1257	KIAA1257	2.78046	0.73113	2.21194	0.196779	0.706022	1.92713	3	128977013	128977066							1
ENSG00000230319	AL022476.1	NA	2.78046	0.73113	2.21129	0.198798	0.701588	1.92713	22	43052055	43052366		1					0
ENSG00000161509	GRIN2C	glutamate ionotropic receptor NMDA type subunit 2C	2.6733	0.461841	2.21054	0.18113	0.742009	2.53315	17	74853517	74855107							1
ENSG00000271020	AC112220.2	NA	2.69436	0.73113	2.18819	0.174912	0.757179	1.88174	3	33797149	33797681		1					0
ENSG00000253696	KBTBD11-OT1	KBTBD11 overlapping transcript 1	2.69436	0.73113	2.17522	0.208644	0.680595	1.88174	8	1975899	1976478							1
ENSG00000266850	AC090912.2	NA	2.52214	0.461841	2.17521	0.226518	0.644897	2.44918	18	22784365	22784666		1					0
ENSG00000103154	NECAB2	N-terminal EF-hand calcium binding protein 2	2.52214	0.461841	2.17196	0.182169	0.739526	2.44918	16	84002347	84002776							1
ENSG00000136040	PLXNC1	plexin C1	5.04429	1.19297	2.17025	0.063244	1.19898	2.08009	12	94279472	94279986							1
ENSG00000182685	BRICD5	BRICHOS domain containing 5	5.10737	0.923681	2.16545	0.0831544	1.08011	2.46711	16	2209979	2209999							1
ENSG00000226098	SEC11B	SEC11 homolog B, signal peptidase complex subunit (pseudogene)	2.4571	0.461841	2.16335	0.223415	0.650888	2.41149	8	54522799	54523297	1						0
ENSG00000197153 /// ENSG00000197153 #or# ENSG00000278677	HIST1H3J	histone cluster 1 H3 family member j #or# histone cluster 1 H2A family member m /// histone cluster 1 H3 family member j	4.86066	1.19297	2.16262	0.0946618	1.02383	2.02659	6	27890635	27890810							1
ENSG00000115919	KYNU	kynureninase	2.4571	0.461841	2.16219	0.289954	0.537672	2.41149	2	142971204	142971393							1
ENSG00000252947	SCARNA1	small Cajal body-specific RNA 1	2.68285	0.461841	2.15617	0.183443	0.736499	2.5383	1	27834401	27834566							1
ENSG00000117971	CHRNB4	cholinergic receptor nicotinic beta 4 subunit	2.59674	0.461841	2.15518	0.224243	0.64928	2.49123	15	78692578	78692894							1
ENSG00000139318	DUSP6	dual specificity phosphatase 6	2.53365	0.73113	2.15459	0.217718	0.662106	1.79302	12	89352040	89352152							1
ENSG00000128564	VGF	VGF nerve growth factor inducible	14.578	3.04033	2.15351	0.00230998	2.63639	2.26149	7	101162516	101162995							1
ENSG00000272054	AC007390.2	NA	2.65028	0.461841	2.12832	0.250981	0.600359	2.52068	2	37208875	37212677		1					0
ENSG00000241281	AC010683.1	NA	4.92374	1.19297	2.12671	0.0974999	1.011	2.0452	4	147425974	147426351		1					0
ENSG00000138623	SEMA7A	semaphorin 7A (John Milton Hagen blood group)	4.93516	0.923681	2.12471	0.0854895	1.06809	2.41763	15	74410968	74411356							1
ENSG00000271133	AC004130.1	NA	2.46861	0.73113	2.12277	0.243102	0.614212	1.7555	7	20328529	20328856		1					0
ENSG00000100362	PVALB	parvalbumin	4.57931	0.923681	2.12256	0.0983959	1.00702	2.30966	22	36817006	36817012							1
ENSG00000168398 #or# ENSG00000258691 /// ENSG00000168398	BDKRB2	bradykinin receptor B2 /// bradykinin receptor B2 #or# NA	2.37099	0.461841	2.12166	0.263337	0.579487	2.36002	14	96241505	96241607							1
ENSG00000279689	AC022400.9	NA	2.68285	0.73113	2.11787	0.22252	0.65263	1.87556	10	73769264	73772862		1					0
ENSG00000188295	ZNF669	zinc finger protein 669	2.12418	0.461841	2.11247	0.200301	0.698316	2.20144	1	247104200	247104365							1
ENSG00000244405 /// ENSG00000058866 #or# ENSG00000244405	ETV5	ETS variant 5 /// diacylglycerol kinase gamma #or# ETS variant 5	2.38054	0.461841	2.09923	0.276884	0.557703	2.36582	3	186105410	186105496							1
ENSG00000188033 #or# ENSG00000269693	AC010422.6	zinc finger protein 490 #or# NA	2.43604	0.73113	2.09349	0.198268	0.702748	1.73634	19	12525720	12527916		1					0
ENSG00000226711	FAM66C	family with sequence similarity 66 member C	4.63285	0.923681	2.08713	0.0957874	1.01869	2.32643	12	8195277	8195652							1
ENSG00000213658 /// ENSG00000213658 #or# ENSG00000261067	LAT	linker for activation of T cells /// linker for activation of T cells #or# NA	2.59674	0.73113	2.08165	0.212197	0.673262	1.8285	16	28990189	28990455							1
ENSG00000254584	AL035078.1	NA	7.48987	2.19339	2.07404	0.0371927	1.42954	1.77178	11	32040106	32040377		1					0
ENSG00000237457	LINC01351	long intergenic non-protein coding RNA 1351	2.44363	0.461841	2.0629	0.315653	0.500791	2.40356	1	190480345	190480735			1				0
ENSG00000274904	AC093512.1	NA	2.50867	0.461841	2.06035	0.286978	0.542151	2.44146	16	30064306	30064825		1					0
ENSG00000144045	DQX1	DEAQ-box RNA dependent ATPase 1	2.3825	0.73113	2.05403	0.28722	0.541786	1.70428	2	74524267	74524307							1
ENSG00000187601	MAGEH1	MAGE family member H1	2.44559	0.73113	2.04457	0.206356	0.685383	1.74198	0	55453035	55453566							1
ENSG00000115112	TFCP2L1	transcription factor CP2 like 1	6.90426	1.38552	2.03739	0.0459474	1.33774	2.31706	2	121224164	121224387							1
ENSG00000274363	AC087742.1	NA	2.27337	0.461841	2.02519	0.251835	0.598884	2.29937	17	4267691	4268430		1					0
ENSG00000284727	AC116562.4	NA	2.27337	0.461841	2.02512	0.250747	0.600765	2.29937	4	4107280	4107497		1					0
ENSG00000183111	ARHGEF37	Rho guanine nucleotide exchange factor 37	4.5678	1.19297	2.02172	0.109905	0.958984	1.93694	5	149631982	149632036							1
ENSG00000258016	HIGD1AP1	HIG1 hypoxia inducible domain family member 1A pseudogene 1	9.22921	1.84736	2.01849	0.0297159	1.52701	2.32074	12	53142053	53142327	1						0
ENSG00000231841	FAM192BP	family with sequence similarity 192 member B, pseudogene	2.46665	0.73113	2.01196	0.333047	0.477494	1.75435	4	152927446	152928207	1						0
ENSG00000172350	ABCG4	ATP binding cassette subfamily G member 4	2.42453	0.73113	2.01179	0.22539	0.647065	1.7295	11	119158234	119158495							1
ENSG00000131400	NAPSA	napsin A aspartic peptidase	2.11267	0.461841	2.0053	0.270022	0.568601	2.1936	19	50361909	50362313		1					0
ENSG00000229115	AL390774.1	NA	0.574098	2.57849	-2.00289	0.157548	0.802587	-2.16716	9	123759719	123759775		1					0
ENSG00000232775	BMS1P22	BMS1, ribosome biogenesis factor pseudogene 22	0.660205	2.84778	-2.00306	0.134309	0.871896	-2.10885	22	15805847	15806011	1						0
ENSG00000283010	AL589826.2	NA	0.497542	2.19339	-2.00673	0.329385	0.482296	-2.14027	6	98829967	98830409		1					0
ENSG00000255182	AC084125.2	NA	0.574098	2.57849	-2.01051	0.185938	0.730633	-2.16716	8	144499334	144499522		1					0
ENSG00000273139	AC007663.3	NA	0.725252	2.84778	-2.01064	0.162417	0.789367	-1.97329	22	20320739	20321203		1					0
ENSG00000242083	RPL7AP31	ribosomal protein L7a pseudogene 31	0.725252	2.84778	-2.01109	0.183096	0.73732	-1.97329	4	56356135	56356932	1						0
ENSG00000189120	SP6	Sp6 transcription factor	0.974023	3.77146	-2.01794	0.100595	0.997423	-1.9531	17	47844914	47847298							1
ENSG00000215278	RPS7P6	ribosomal protein S7 pseudogene 6	0.660205	2.84778	-2.0245	0.256903	0.59023	-2.10885	4	17427696	17428274	1						0
ENSG00000251178	OR7E21P	olfactory receptor family 7 subfamily E member 21 pseudogene	0.562588	2.19339	-2.03328	0.267792	0.572202	-1.96301	3	130034553	130035539	1						0
ENSG00000243709	LEFTY1	left-right determination factor 1	0.648695	2.38594	-2.04253	0.34988	0.45608	-1.87895	1	225887977	225888032							1
ENSG00000213104	NPM1P46	nucleophosmin 1 pseudogene 46	1.2343	5.69556	-2.04338	0.0432972	1.36354	-2.20614	2	197379701	197380317	1						0
ENSG00000218682	AC064847.1	NA	0.487991	2.38594	-2.05176	0.376072	0.424729	-2.28963	2	25856461	25856966		1					0
ENSG00000051108 #or# ENSG00000261270 /// ENSG00000051108	HERPUD1	homocysteine inducible ER protein with ubiquitin like domain 1 /// homocysteine inducible ER protein with ubiquitin like domain 1 #or# NA	112.141	463.106	-2.06291	1.06772e-45	44.9715	-2.04603	16	56943126	56943407							1
ENSG00000274849	AC023043.4	NA	1.62468	7.61967	-2.06399	0.0217026	1.66349	-2.22957	18	36189824	36190272		1					0
ENSG00000236137	AL445231.1	NA	0.648695	2.11665	-2.0686	0.194404	0.711295	-1.70617	1	117026297	117026786		1					0
ENSG00000242349	NPPA-AS1	NPPA antisense RNA 1	0.974023	4.04075	-2.07152	0.0557087	1.25408	-2.0526	1	11847577	11848079							1
ENSG00000272092	AC087623.3	NA	1.1482	6.04159	-2.08005	0.0484789	1.31445	-2.39556	8	38382364	38383461		1					0
ENSG00000227514	AC107890.1	NA	1.04862	3.57891	-2.08042	0.133831	0.873442	-1.77103	8	113377065	113377227		1					0
ENSG00000229000	SEPT7P8	septin 7 pseudogene 8	0.562588	2.11665	-2.08505	0.39682	0.401407	-1.91163	19	53772506	53773280	1						0
ENSG00000258300	NUTF2P2	nuclear transport factor 2 pseudogene 2	0.725252	3.11707	-2.09231	0.160039	0.795774	-2.10364	14	35819837	35820220	1						0
ENSG00000072657	TRHDE	thyrotropin releasing hormone degrading enzyme	1.29935	5.61883	-2.09585	0.064789	1.1885	-2.11248	12	72621108	72621331							1
ENSG00000214192	UBE2V1P2	ubiquitin conjugating enzyme E2 V1 pseudogene 2	0.811359	3.04033	-2.09978	0.138257	0.859314	-1.90582	3	175718231	175718670	1						0
ENSG00000125337	KIF25	kinesin family member 25	0.899425	4.77188	-2.1135	0.077572	1.1103	-2.40748	6	168035752	168036147							1
ENSG00000164845	FAM86FP	family with sequence similarity 86 member F, pseudogene	0.562588	2.11665	-2.12219	0.290653	0.536625	-1.91163	12	8234342	8234425	1						0
ENSG00000229519	AL591866.1	NA	0.411434	2.19339	-2.12411	0.274766	0.561036	-2.41443	1	6548448	6548619		1					0
ENSG00000213943	KRT18P17	keratin 18 pseudogene 17	0.822869	4.04075	-2.12925	0.0915728	1.03823	-2.29589	3	12787393	12788671	1						0
ENSG00000137496	IL18BP	interleukin 18 binding protein	0.497542	2.11665	-2.13376	0.176971	0.752099	-2.0889	11	72001897	72002527							1
ENSG00000178568	ERBB4	erb-b2 receptor tyrosine kinase 4	1.38546	6.42669	-2.16456	0.02415	1.61708	-2.21372	2	212124584	212124903							1
ENSG00000262319	AC007952.6	NA	0.648695	2.65523	-2.16473	0.330415	0.48094	-2.03322	17	19141017	19143689		1					0
ENSG00000213935	RPL22P16	ribosomal protein L22 pseudogene 16	0.660205	3.04033	-2.16823	0.156689	0.804961	-2.20324	7	4865432	4865804	1						0
ENSG00000123892	RAB38	RAB38, member RAS oncogene family	0.487991	2.57849	-2.1744	0.289503	0.538347	-2.4016	11	88113612	88113987							1
ENSG00000215313	RPL6P30	ribosomal protein L6 pseudogene 30	0.962513	3.57891	-2.17703	0.103162	0.986482	-1.89464	0	16198428	16199289	1						0
ENSG00000185633	NDUFA4L2	NDUFA4, mitochondrial complex associated like 2	0.660205	3.04033	-2.17765	0.115435	0.937662	-2.20324	12	57239546	57240495							1
ENSG00000259826	AC072061.1	NA	0.974023	4.2333	-2.18294	0.100175	0.999242	-2.11976	7	39947522	39949755		1					0
ENSG00000198987	MIR16-2	microRNA 16-2	1.29935	6.31088	-2.2033	0.174455	0.758316	-2.28005	3	160404745	160404825				1			0
ENSG00000271964	AC090948.1	NA	0.497542	2.38594	-2.20631	0.24356	0.613394	-2.26167	3	16314439	16314987		1					0
ENSG00000272183	AC005041.3	NA	0.487991	2.57849	-2.20827	0.356693	0.447706	-2.4016	2	74501717	74502365		1					0
ENSG00000273472	AC096733.2	NA	1.13669	5.50301	-2.21036	0.0651543	1.18606	-2.27539	4	140756528	140757921		1					0
ENSG00000221184	MIR1254-1	microRNA 1254-1	0.411434	2.11665	-2.21238	0.242289	0.615666	-2.36305	10	68759318	68759414				1			0
ENSG00000270604 /// ENSG00000231074 #or# ENSG00000270604	HCG17	HLA complex group 18 (non-protein coding) #or# HLA complex group 17 (non-protein coding) /// HLA complex group 17 (non-protein coding)	0.411434	2.11665	-2.21254	0.237367	0.62458	-2.36305	6	30234039	30234268							1
ENSG00000237631	AL161454.1	NA	0.411434	2.11665	-2.21296	0.226194	0.645519	-2.36305	9	95918136	95918704		1					0
ENSG00000232803	SLCO4A1-AS1	SLCO4A1 antisense RNA 1	0.562588	2.3092	-2.2134	0.433491	0.36302	-2.03724	20	62663031	62663487							1
ENSG00000111679	PTPN6	protein tyrosine phosphatase, non-receptor type 6	0.574098	3.11707	-2.21491	0.189797	0.72171	-2.44082	12	6961126	6961316							1
ENSG00000166012 #or# ENSG00000239195	SNORD5	TATA-box binding protein associated factor, RNA polymerase I subunit D #or# small nucleolar RNA, C/D box 5	0.497542	2.38594	-2.21529	0.188501	0.724687	-2.26167	11	93733228	93733300					1		0
ENSG00000236929	AC112498.1	NA	0.411434	2.11665	-2.21685	0.171331	0.766164	-2.36305	0	15117437	15117768		1					0
ENSG00000242952	RPSAP3	ribosomal protein SA pseudogene 3	0.497542	2.38594	-2.22023	0.165111	0.782225	-2.26167	14	76634775	76635661	1						0
ENSG00000185774	KCNIP4	potassium voltage-gated channel interacting protein 4	0.497542	2.38594	-2.22147	0.159739	0.796588	-2.26167	4	21729850	21730112							1
ENSG00000261360	AC010491.1	NA	0.574098	3.04033	-2.24322	0.085375	1.06867	-2.40486	5	14663103	14663343		1					0
ENSG00000162595	DIRAS3	DIRAS family GTPase 3	0.725252	3.30962	-2.24697	0.108743	0.963598	-2.19011	1	68045962	68046607							1
ENSG00000242474	AC093627.5	NA	0.887915	4.2333	-2.24816	0.0436346	1.36017	-2.25329	7	148232	148714		1					0
ENSG00000254432	AC113143.1	NA	0.562588	2.38594	-2.25418	0.219977	0.657623	-2.08441	8	60808735	60808926		1					0
ENSG00000277125	AC211476.4	NA	0.574098	3.04033	-2.25439	0.138126	0.859726	-2.40486	7	73077260	73077353		1					0
ENSG00000178162	FAR2P2	fatty acyl-CoA reductase 2 pseudogene 2	0.562588	2.38594	-2.25627	0.205317	0.687576	-2.08441	2	130426192	130426263	1						0
ENSG00000175197	DDIT3	DNA damage inducible transcript 3	42.1072	205.349	-2.25661	6.25626e-30	29.2037	-2.28594	12	57517476	57517542							1
ENSG00000213875	AC005019.1	NA	0.562588	2.38594	-2.25864	0.186496	0.72933	-2.08441	7	13872424	13872513		1					0
ENSG00000237922	AL450309.1	NA	1.06013	4.69514	-2.26768	0.0852062	1.06953	-2.14693	1	236285976	236286276		1					0
ENSG00000282851 /// ENSG00000141971 #or# ENSG00000282851	BISPR	multivesicular body subunit 12A #or# BST2 interferon stimulated positive regulator (non-protein coding) /// BST2 interferon stimulated positive regulator (non-protein coding)	0.574098	3.11707	-2.26876	0.264295	0.57791	-2.44082	19	17414136	17414347							1
ENSG00000242858	AC020899.1	NA	0.799849	2.84778	-2.27238	0.178487	0.748393	-1.83204	5	83746388	83746989		1					0
ENSG00000257480	MRPL2P1	mitochondrial ribosomal protein L2 pseudogene 1	1.22279	5.96485	-2.28289	0.0315323	1.50124	-2.28631	12	89752913	89753831	1						0
ENSG00000276900	AC023157.3	NA	1.13669	5.69556	-2.28392	0.0281255	1.5509	-2.325	12	31729117	31731204		1					0
ENSG00000201470	RNY4P7	RNA, Ro-associated Y4 pseudogene 7	1.06013	5.04117	-2.28843	0.069996	1.15493	-2.24952	2	127798903	127798998	1						0
ENSG00000277449	CEBPB-AS1	CEBPB antisense RNA 1	0.325327	2.11665	-2.29898	0.151631	0.819213	-2.70182	20	50184598	50186420							1
ENSG00000181781	ODF3L2	outer dense fiber of sperm tails 3 like 2	0.411434	2.38594	-2.31446	0.165994	0.779909	-2.53582	19	464167	464364							1
ENSG00000227199	ST7-AS1	ST7 antisense RNA 1	1.77387	7.61967	-2.31621	0.0124463	1.90496	-2.10283	7	116952446	116954334							1
ENSG00000214439	FAM185BP	family with sequence similarity 185 member B, pseudogene	0.487991	3.04033	-2.32176	0.107408	0.968964	-2.6393	7	77083886	77084021	1						0
ENSG00000279491	AP003733.4	NA	0.497542	2.65523	-2.32285	0.231141	0.636122	-2.41595	11	61967794	61969490		1					0
ENSG00000138622	HCN4	hyperpolarization activated cyclic nucleotide gated potassium channel 4	0.574098	3.30962	-2.32458	0.114803	0.940048	-2.5273	15	73319859	73322480							1
ENSG00000231064	AC234582.1	NA	0.411434	2.38594	-2.32887	0.211236	0.675232	-2.53582	1	155205035	155205367		1					0
ENSG00000280286	FRG1KP	FSHD region gene 1 family member K, pseudogene	0.574098	3.30962	-2.3289	0.121885	0.914048	-2.5273	9	65646982	65647018	1						0
ENSG00000273137	AL022328.2	NA	0.411434	2.38594	-2.34468	0.279147	0.554166	-2.53582	22	50208461	50208769		1					0
ENSG00000269843	AC008537.2	NA	0.562588	2.65523	-2.36424	0.181391	0.741384	-2.23869	19	40831221	40831577		1					0
ENSG00000243795	LINC02044	long intergenic non-protein coding RNA 2044	0.325327	2.11665	-2.37408	0.322189	0.491889	-2.70182	3	113142350	113144335			1				0
ENSG00000199552	RF00092	NA	0.325327	2.11665	-2.37758	0.332741	0.477894	-2.70182	3	183453814	183453944		1					0
ENSG00000172748	ZNF596	zinc finger protein 596	0.908976	5.31046	-2.37818	0.0366232	1.43624	-2.54652	8	244619	244654							1
ENSG00000149654	CDH22	cadherin 22	0.325327	2.11665	-2.41061	0.4517	0.34515	-2.70182	20	46209821	46210560							1
ENSG00000267226	AC104971.1	NA	0.574098	3.57891	-2.41226	0.119067	0.924208	-2.64015	18	58670009	58670808		1					0
ENSG00000213654	GPSM3	G protein signaling modulator 3	0.325327	2.19339	-2.41539	0.444423	0.352204	-2.7532	6	32190767	32191503							1
ENSG00000279233	AC122688.3	NA	0.897466	4.04075	-2.41958	0.0360975	1.44252	-2.17069	12	125138245	125141711		1					0
ENSG00000141744	PNMT	phenylethanolamine N-methyltransferase	0.660205	4.11749	-2.43164	0.0697779	1.15628	-2.64078	17	39669841	39670090							1
ENSG00000275630	AC004816.2	NA	0.660205	3.77146	-2.44457	0.125888	0.900017	-2.51414	14	70823820	70823984		1					0
ENSG00000239978	OR7E53P	olfactory receptor family 7 subfamily E member 53 pseudogene	0.325327	2.38594	-2.45227	0.196432	0.706787	-2.8746	3	125734295	125735198	1						0
ENSG00000224215	AL606469.1	NA	0.411434	2.65523	-2.46196	0.228489	0.641135	-2.6901	10	23344424	23345181		1					0
ENSG00000246792	AC106038.1	NA	0.325327	2.38594	-2.48527	0.24139	0.617281	-2.8746	8	90656514	90656598		1					0
ENSG00000163885	CFAP100	cilia and flagella associated protein 100	0.325327	2.38594	-2.49884	0.26349	0.579236	-2.8746	3	126436291	126436556							1
ENSG00000161040	FBXL13	F-box and leucine rich repeat protein 13	0.411434	2.57849	-2.50252	0.202751	0.693036	-2.64779	7	103074771	103074811							1
ENSG00000269886	AC022382.1	NA	0.411434	2.57849	-2.50793	0.142475	0.846262	-2.64779	3	9812762	9813097		1					0
ENSG00000246922	UBAP1L	ubiquitin associated protein 1 like	0.411434	2.57849	-2.51294	0.114309	0.941919	-2.64779	15	65093048	65093231							1
ENSG00000227165	WDR11-AS1	WDR11 antisense RNA 1	0.497542	2.77104	-2.56961	0.117776	0.928943	-2.47754	10	120821203	120821354							1
ENSG00000162631	NTNG1	netrin G1	0.487991	3.8482	-2.57417	0.0968752	1.01379	-2.97926	1	107333949	107334023							1
ENSG00000275056	AC020663.3	NA	0.325327	2.57849	-2.60027	0.10709	0.970252	-2.98656	16	4839244	4840334		1					0
ENSG00000129910	CDH15	cadherin 15	0.813318	6.23414	-2.60048	0.0540888	1.26689	-2.9383	16	89195156	89195492							1
ENSG00000150628	SPATA4	spermatogenesis associated 4	0.325327	2.65523	-2.60049	0.206409	0.685272	-3.02887	4	176192972	176193076							1
ENSG00000180229	HERC2P3	hect domain and RLD 2 pseudogene 3	1.19977	5.23372	-2.61995	0.0357122	1.44718	-2.12508	15	20462408	20462446	1						0
ENSG00000275532	AC006449.2	NA	0.325327	2.57849	-2.6215	0.152307	0.817281	-2.98656	17	38703480	38703757		1					0
ENSG00000240065	PSMB9	proteasome subunit beta 9	0.725252	4.57933	-2.62153	0.0475687	1.32268	-2.65858	6	32858364	32858722							1
ENSG00000214552	COPS8P2	COP9 signalosome subunit 8 pseudogene 2	0.725252	4.2333	-2.62278	0.0526705	1.27843	-2.54523	3	68145004	68145630	1						0
ENSG00000235872	AC078777.1	NA	0.562588	3.11707	-2.62536	0.169763	0.770156	-2.47004	12	67658991	67659584		1					0
ENSG00000261136	AC023908.3	NA	0.562588	3.11707	-2.6285	0.103952	0.983168	-2.47004	15	39782571	39785617		1					0
ENSG00000270083	AL021878.2	NA	0.574098	3.96401	-2.63423	0.0615774	1.21058	-2.78759	22	42089630	42090028		1					0
ENSG00000267454 /// ENSG00000198440 #or# ENSG00000267454	ZNF582-AS1	zinc finger protein 583 #or# ZNF582 antisense RNA 1 (head to head) /// ZNF582 antisense RNA 1 (head to head)	1.07164	7.6964	-2.63979	0.00714522	2.14598	-2.84436	19	56394217	56394433							1
ENSG00000168267	PTF1A	pancreas associated transcription factor 1a	0.411434	3.11707	-2.65396	0.0664533	1.17748	-2.92146	10	23193774	23194163							1
ENSG00000162004	CCDC78	coiled-coil domain containing 78	0.325327	2.84778	-2.6776	0.0901761	1.04491	-3.12988	16	725123	725293							1
ENSG00000188107	EYS	eyes shut homolog (Drosophila)	0.725252	4.50259	-2.6783	0.0465088	1.33246	-2.6342	6	65490660	65490707							1
ENSG00000184731	FAM110C	family with sequence similarity 110 member C	0.325327	2.65523	-2.68957	0.34618	0.460698	-3.02887	2	41221	41627							1
ENSG00000223692	DIP2A-IT1	DIP2A intronic transcript 1	0.799849	3.8482	-2.70263	0.0884648	1.05323	-2.26638	21	46469146	46469306							1
ENSG00000278107	AC027575.2	NA	0.325327	3.11707	-2.73732	0.0701973	1.15368	-3.26023	18	76805151	76805736		1					0
ENSG00000260886	TAT-AS1	TAT antisense RNA 1	0.325327	3.11707	-2.81431	0.118934	0.924695	-3.26023	16	71578065	71578187							1
ENSG00000199072	MIRLET7F1	microRNA let-7f-1	0.562588	3.57891	-2.84205	0.127144	0.895703	-2.66937	9	94176347	94176433				1			0
ENSG00000188729	OSTN	osteocrin	0.574098	5.23372	-2.90292	0.0120647	1.91848	-3.18847	3	191250119	191250121							1
ENSG00000130822	PNCK	pregnancy up-regulated nonubiquitous CaM kinase	0.248771	2.19339	-2.90574	0.207754	0.68245	-3.14027	0	153686625	153686683							1
ENSG00000182742 #or# ENSG00000257178 /// ENSG00000257178	AC103702.1	NA /// homeobox B4 #or# NA	0.325327	3.30962	-2.90799	0.058031	1.23634	-3.3467	17	48579630	48582259		1					0
ENSG00000164342	TLR3	toll like receptor 3	0.399925	2.19339	-2.92511	0.311949	0.505916	-2.45536	4	186082320	186082717							1
ENSG00000130234	ACE2	angiotensin I converting enzyme 2	0.248771	2.19339	-2.92909	0.358885	0.445045	-3.14027	0	15594887	15595003							1
ENSG00000176697	BDNF	brain derived neurotrophic factor	0.399925	2.19339	-2.93017	0.37639	0.424362	-2.45536	11	27654893	27657820							1
ENSG00000101282	RSPO4	R-spondin 4	0.248771	2.19339	-2.93373	0.47381	0.324396	-3.14027	20	960254	960356							1
ENSG00000254948	OR7E158P	olfactory receptor family 7 subfamily E member 158 pseudogene	0.162664	2.19339	-2.95294	0.190072	0.721082	-3.7532	8	11919900	11920809	1						0
ENSG00000232480	TGFB2-AS1	TGFB2 antisense RNA 1 (head to head)	0.399925	2.11665	-2.9557	0.185232	0.732283	-2.40398	1	218344196	218344462							1
ENSG00000232656	IDI2-AS1	IDI2 antisense RNA 1	0.248771	2.11665	-2.96374	0.156902	0.804371	-3.0889	10	1043761	1044024							1
ENSG00000118514	ALDH8A1	aldehyde dehydrogenase 8 family member A1	0.248771	2.11665	-2.96742	0.145387	0.837475	-3.0889	6	134942539	134942564							1
ENSG00000159640	ACE	angiotensin I converting enzyme	0.648695	3.96401	-2.97104	0.0573265	1.24164	-2.61135	17	63496798	63496985							1
ENSG00000229835	KHSRPP1	KH-type splicing regulatory protein pseudogene 1	0.162664	2.11665	-3.00151	0.276024	0.559053	-3.70182	9	21695176	21696943	1						0
ENSG00000172404	DNAJB7	DnaJ heat shock protein family (Hsp40) member B7	0.162664	2.11665	-3.0052	0.188576	0.724515	-3.70182	22	40859549	40861064							1
ENSG00000175564	UCP3	uncoupling protein 3	0.162664	2.11665	-3.00565	0.181575	0.740945	-3.70182	11	74007043	74007304							1
ENSG00000140285	FGF7	fibroblast growth factor 7	0.162664	2.11665	-3.00617	0.174088	0.759232	-3.70182	15	49484310	49484520							1
ENSG00000269420	PLA2G4C-AS1	PLA2G4C antisense RNA 1	0.162664	2.19339	-3.02241	0.44761	0.3491	-3.7532	19	48061913	48062222							1
ENSG00000274756	AC243732.1	NA	0.325327	3.57891	-3.02836	0.0862833	1.06407	-3.45956	17	36574462	36575325		1					0
ENSG00000242608	RPS23P5	ribosomal protein S23 pseudogene 5	0.162664	2.38594	-3.13473	0.13778	0.860814	-3.8746	5	13250235	13250662	1						0
ENSG00000279115	AC006386.2	NA	0.162664	2.38594	-3.16178	0.456546	0.340516	-3.8746	0	25307729	25307803		1					0
ENSG00000273711	AC005520.5	NA	0.325327	4.04075	-3.16675	0.0342122	1.46582	-3.63466	14	73885392	73885555		1					0
ENSG00000229589	ACVR2B-AS1	ACVR2B antisense RNA 1	0.248771	2.65523	-3.19548	0.0815809	1.08841	-3.41595	3	38451027	38453225							1
ENSG00000202441	RNY4P10	RNA, Ro-associated Y4 pseudogene 10	0.650654	7.77314	-3.29806	0.0593455	1.22661	-3.57853	6	33199601	33199696	1						0
ENSG00000279080	AL022322.2	NA	0.399925	2.84778	-3.37346	0.0449097	1.34766	-2.83204	22	38130216	38150612		1					0
ENSG00000178726	THBD	thrombomodulin	0.562588	5.57975	-3.45573	0.0425894	1.3707	-3.31005	20	23045633	23047776							1
ENSG00000279838	AL356273.3	NA	0.162664	3.11707	-3.48158	0.0403339	1.39433	-4.26023	1	185292384	185294372		1					0
ENSG00000174145	NWD2	NACHT and WD repeat domain containing 2	0.248771	3.04033	-3.54991	0.0243597	1.61333	-3.61134	4	37447218	37449465		1					0
ENSG00000280195	AC245140.2	NA	0.162664	3.38636	-3.56111	0.0341926	1.46607	-4.37977	0	154396878	154398816		1					0
ENSG00000207605	MIR191	microRNA 191	0.248771	3.38636	-3.56675	0.0887826	1.05167	-3.76685	3	49020618	49020709				1			0
ENSG00000267355	RPL9P29	ribosomal protein L9 pseudogene 29	0.162664	3.30962	-3.63224	0.0311822	1.50609	-4.3467	17	78845953	78846433	1						0
ENSG00000261766	AC133550.2	NA	0.248771	3.8482	-3.76851	0.120092	0.920485	-3.9513	16	28862166	28862530		1					0
ENSG00000120055	C10orf95	chromosome 10 open reading frame 95	0.162664	3.77146	-3.83021	0.0239404	1.62087	-4.53516	10	102449837	102450451							1
ENSG00000279110	AL022323.4	NA	0	2.19339	-3.85343	0.0496478	1.3041	?	22	25052122	25065241		1					0
ENSG00000267332	BOLA3P2	bolA family member 3 pseudogene 2	0.162664	4.11749	-3.88974	0.0470183	1.32773	-4.6618	19	9019787	9019984	1						0
ENSG00000199024	MIR103A2	microRNA 103a-2	0.162664	4.04075	-3.88992	0.00936646	2.02842	-4.63466	20	3917494	3917571				1			0
ENSG00000155749	ALS2CR12	amyotrophic lateral sclerosis 2 chromosome region 12	0	2.11665	-3.93121	0.262931	0.580159	?	2	201351405	201351451							1
ENSG00000199150	MIRLET7G	microRNA let-7g	0	2.19339	-3.93676	0.203278	0.691909	?	3	52268278	52268361				1			0
ENSG00000273464	AP000238.1	NA	0	2.11665	-3.93789	0.146082	0.835404	?	21	29657406	29657831		1					0
ENSG00000223652	AC106786.1	NA	0	2.19339	-3.93935	0.217228	0.663084	?	5	123087634	123087939		1					0
ENSG00000212027	MIR374B	microRNA 374b	0	2.19339	-3.94658	0.264943	0.576848	?	0	74218547	74218618				1			0
ENSG00000264186	SNRPCP4	small nuclear ribonucleoprotein polypeptide C pseudogene 4	0	2.11665	-3.95709	0.0410265	1.38694	?	18	2990652	2991078	1						0
ENSG00000200211	RNY4P27	RNA, Ro-associated Y4 pseudogene 27	0	2.19339	-3.96026	0.416406	0.380483	?	13	95336106	95336201	1						0
ENSG00000165076	PRSS37	serine protease 37	0	2.19339	-3.96243	0.453747	0.343187	?	7	141836359	141836535							1
ENSG00000199094	MIR30C2	microRNA 30c-2	0	2.19339	-3.96243	0.453747	0.343187	?	6	71376960	71377031				1			0
ENSG00000261488	AC128688.2	NA	0	2.11665	-3.96301	0.0299286	1.52391	?	3	112133423	112135359		1					0
ENSG00000199065	MIR101-2	microRNA 101-2	0	2.65523	-4.22529	0.135971	0.866555	?	9	4850297	4850375				1			0
ENSG00000198974	MIR30E	microRNA 30e	0	2.65523	-4.24055	0.336287	0.473289	?	1	40754355	40754446				1			0
ENSG00000156968	MPV17L	MPV17 mitochondrial inner membrane protein like	0	2.84778	-4.35029	0.321189	0.49324	?	16	15407933	15408118							1
ENSG00000283638 #or# ENSG00000284538 /// ENSG00000283638 #or# ENSG00000284043 /// ENSG00000283638 #or# ENSG00000284107 /// ENSG00000283638 #or# ENSG00000284157 /// ENSG00000283638 #or# ENSG00000283931	AC002407.1	NA #or# microRNA 106a /// NA #or# microRNA 19b-2 /// NA #or# microRNA 92a-2 /// NA #or# microRNA 18b /// NA #or# microRNA 20b	0	2.92452	-4.3785	0.364349	0.438483	?	0	134168911	134170352		1					0
ENSG00000208006	MIR16-1	microRNA 16-1	0.399925	6.04159	-4.40019	0.00533399	2.27295	-3.91713	13	50048973	50049061				1			0
ENSG00000283450	MIR486-2	microRNA 486-2	0	3.11707	-4.45637	0.0414625	1.38234	?	8	41660444	41660507				1			0
ENSG00000261428	AC097461.1	NA	0	3.30962	-4.57983	0.00853515	2.06879	?	2	222566899	222569719		1					0
ENSG00000250091	DNAH10OS	dynein axonemal heavy chain 10 opposite strand	0	3.8482	-4.74406	0.0110014	1.95855	?	12	123926424	123930543							1
ENSG00000264066 #or# ENSG00000284565	MIR451A	NA #or# microRNA 451a	0.562588	17.3169	-5.11949	0.00608852	2.21549	-4.94396	17	28861369	28861440				1			0
ENSG00000274536 #or# ENSG00000284567	AL034397.3	NA #or# microRNA 223	0	7.04201	-5.62073	0.00329088	2.48269	?	0	66018824	66020422		1					0
