# Supplementary material for: MLL-AF4 and a murinized pSer-variant thereof are turning on the nucleolar stress pathway
Source: Cell Biosci. 2022 Apr 25;12:47. doi: 10.1186/s13578-022-00781-y (PMC9036721; doi:10.1186/s13578-022-00781-y)
Supplement: Supplementary file 6 — Additional file 6: Heatmap dataset 1. [file 13578_2022_781_MOESM6_ESM.xlsx]

## Sheet: Sheet1
gene symbol	MA4	A4M	CO
AANAT	2.04327	2.07691	0.495492
ABCG4	1.03186	2.42948	3.00891
ABCG5	2.89852	3.47169	NA
AC002310.2	2.15094	3.46431	NA
AC004067.1	1.91232	2.28564	-0.929876
AC004080.4	2.50359	2.01349	1.40916
AC004130.1	-1.77968	1.71693	1.43183
AC004854.2	2.17464	1.08027	0.495512
AC005034.4	-0.726243	2.08607	-0.917099
AC005332.1	0.667257	2.48486	3.92446
AC005534.1	-0.722322	1.08199	2.46595
AC005865.2	2.11377	2.64773	2.50745
AC006213.1	0.667258	0.990664	3.5504
AC006277.1	2.10618	1.57884	2.04842
AC006450.3	1.05452	2.1532	1.69176
AC006511.5	2.93167	NA	3.92348
AC006557.6	0.0508889	0.950869	2.26019
AC006963.1	1.55852	1.06979	2.07166
AC006978.2	0.667252	0.990663	3.45909
AC007250.1	3.95133	4.06064	4.22158
AC007375.3	0.641791	1.09063	0.497952
AC007390.2	0.648165	0.506422	2.58703
AC007570.1	1.49544	2.88294	3.4695
AC007686.1	1.54367	3.20312	3.92302
AC007823.1	3.24083	2.88183	3.53509
AC008280.3	2.81231	0.990663	NA
AC008397.2	3.33461	NA	3.98539
AC008543.1	1.70989	2.65608	0.530321
AC008555.8	1.49681	1.84781	2.14437
AC008969.1	2.40659	2.08159	0.494715
AC008972.1	2.44772	3.70201	NA
AC008993.1	1.38046	2.20188	0.462143
AC009021.1	2.6475	2.48178	0.526976
AC009088.1	1.46364	0.492013	1.60322
AC009120.5	2.33273	1.06573	0.563531
AC009268.2	1.79832	-0.399487	2.07623
AC009269.4	0.562267	2.21392	0.462025
AC009533.1	2.88223	0.990662	3.55501
AC010422.6	1.38851	2.43222	2.06715
AC010525.1	0.667256	1.87834	4.15204
AC010542.4	1.93128	1.73142	2.12278
AC010624.1	NA	NA	4.05853
AC010683.1	1.97787	2.17171	0.445443
AC010884.1	2.84999	2.88621	4.9535
AC011005.1	0.667257	1.88895	1.89393
AC011270.1	0.727932	2.29601	0.539465
AC011405.1	-0.718182	2.07723	0.499681
AC011466.4	2.65595	3.79145	2.82978
AC011773.1	1.59051	NA	3.45722
AC011997.1	0.980543	-0.508855	2.77527
AC012358.3	1.15829	1.0632	2.07236
AC012640.5	0.0999875	0.493316	2.87213
AC013476.1	-1.67631	0.493176	1.41716
AC013731.1	3.37205	1.89084	1.9429
AC015911.7	1.53429	NA	3.57452
AC016397.2	2.26926	1.47141	2.11568
AC016629.3	2.02146	0.499804	0.497602
AC017083.3	0.383344	1.04317	2.11417
AC020907.2	1.69754	2.07689	1.44286
AC020916.1	0.0555912	0.973458	2.12147
AC021086.1	-0.718102	1.06962	2.07875
AC022211.2	2.05479	2.8833	3.8656
AC022400.5	3.55721	1.89303	3.02867
AC022400.9	1.77512	0.991455	-0.996177
AC022417.1	0.10023	2.30083	1.43865
AC023983.1	1.71925	0.489171	2.46576
AC024937.2	-0.0570813	1.38435	2.04809
AC025048.2	2.16276	1.79956	2.55968
AC025048.4	0.632162	0.999342	2.06117
AC025263.2	-1.85276	0.315081	2.00315
AC025287.2	2.38493	0.486648	-0.917641
AC026726.1	1.4188	-0.406215	2.52467
AC027288.3	-0.714019	0.493548	0.500952
AC027601.3	-1.67226	2.31151	0.606142
AC027612.3	2.08849	2.47149	1.89349
AC034229.4	1.04312	2.07199	2.52258
AC036176.1	1.4242	2.23636	1.40536
AC040160.1	1.01734	1.99648	2.44619
AC040169.3	0.962789	-0.390007	2.08138
AC046130.1	2.79321	2.89493	2.77602
AC051619.6	0.75777	1.08123	2.07614
AC055733.1	2.34999	2.2913	1.94182
AC062028.2	1.58795	1.12688	2.45596
AC068792.1	2.71685	1.43296	2.41725
AC069281.2	1.1292	2.29537	-0.914486
AC073352.1	2.10736	2.0565	2.06953
AC079174.2	1.06979	0.957864	-1.03732
AC079322.1	0.655741	2.06425	2.07142
AC084125.4	1.39085	2.01493	0.585765
AC084757.2	1.91976	0.988792	2.69642
AC087499.4	2.57875	4.20839	2.91334
AC087742.1	1.488	1.06185	0.495135
AC090152.1	0.667255	1.89034	NA
AC090360.1	0.704359	2.29395	0.544458
AC090517.2	2.49476	1.42443	2.72154
AC090673.1	1.43621	1.0655	2.57529
AC090912.2	1.20598	1.07316	0.545346
AC091167.4	1.41941	1.07013	2.51638
AC092642.1	1.06192	0.366917	1.63257
AC092933.1	1.18046	0.497212	0.55543
AC093512.1	-0.724552	1.06974	0.562603
AC096642.1	2.94201	3.21046	3.54204
AC096649.2	1.74242	NA	3.55434
AC097724.1	NA	2.44404	NA
AC098479.1	2.84657	0.990663	1.89216
AC098820.1	3.84931	0.990661	1.8884
AC100757.1	0.810442	2.44159	1.5867
AC100793.4	0.70499	1.49458	2.14087
AC104041.1	0.714694	-1.35309	2.08065
AC104581.4	1.09007	1.48482	2.0724
AC104759.1	2.21069	NA	3.64688
AC106047.1	0.184162	2.44416	1.13469
AC107214.2	1.66167	1.40433	2.40802
AC107959.2	-0.87831	0.439687	2.07385
AC109992.1	3.06563	1.8895	2.91819
AC110792.3	1.98248	4.05779	1.95701
AC112220.2	2.37246	2.23919	0.447813
AC112240.1	1.37182	1.91787	4.42116
AC114482.1	1.48919	2.90161	3.92332
AC116351.1	2.15999	1.47111	2.77468
AC116407.4	2.01219	1.08412	1.43764
AC116535.1	1.03667	0.988159	2.43656
AC116562.4	1.07939	1.07081	0.495064
AC116565.2	1.07729	1.81301	2.1383
AC118344.1	0.667258	0.990664	3.37836
AC124944.2	0.741867	1.07203	1.44026
AC125437.1	0.80461	1.14962	1.14334
AC125611.4	2.04984	2.8758	3.53764
AC129492.5	1.54253	0.990663	1.88074
AC131212.1	3.06177	3.48263	2.91532
AC131212.2	2.42859	0.990663	4.41311
AC135050.7	2.14066	1.4847	-0.923643
AC136604.3	1.03979	1.75934	1.4566
AC136632.2	0.255823	-0.393761	2.07927
AC137630.2	0.839779	1.06189	2.14036
AC138409.2	2.73836	2.6449	2.46865
AC140134.1	2.55664	3.69798	1.89417
AC145343.1	3.48964	NA	1.96131
AC146507.1	NA	3.4752	NA
AC146944.2	-1.81584	0.386635	2.11835
AC147067.1	0.096901	-0.400031	2.07596
AC148477.3	-0.856699	-1.49509	0.36042
AC211476.3	0.739046	0.51712	-0.912327
AC211486.3	3.12646	2.46125	1.88875
AC239799.2	0.123468	0.997864	2.39267
AC242842.1	-0.715335	0.511338	2.54342
AC243830.3	-0.708602	-0.38519	2.63122
AC243960.2	0.154153	-0.398864	2.23927
ACOT11	2.57986	4.68553	1.90137
ADAM12	2.68161	2.46935	2.8172
ADAM8	1.11133	3.18034	2.41958
ADAMTS10	-0.221032	-0.425525	2.43565
ADAMTS2	0.286306	1.27395	2.06967
ADAMTSL3	1.25426	-0.391043	2.17445
ADNP-AS1	-0.0207171	-1.47755	2.71164
AF131215.5	NA	0.990665	3.45906
AFAP1L2	1.79268	1.51824	2.34919
AKR7A3	3.1738	2.89129	1.8965
AL022310.1	3.53995	2.8795	NA
AL022393.1	1.70129	1.92224	2.11199
AL022476.1	1.01143	1.40621	1.37441
AL031055.1	2.21455	3.4586	NA
AL031283.1	2.51876	1.8932	3.77936
AL031710.2	3.26774	0.482828	2.16835
AL031847.1	0.0959572	2.07448	0.498724
AL031848.2	NA	0.990665	2.92224
AL035078.1	1.46457	0.821025	0.46774
AL049543.1	1.40338	0.990663	1.88113
AL049795.1	0.628786	2.08046	-0.90537
AL049796.1	1.20182	2.06508	2.52085
AL096712.1	2.0603	0.486518	0.497985
AL110118.2	0.734076	1.48113	2.51488
AL121845.1	3.57608	2.88136	3.46973
AL121900.2	2.62341	3.02998	3.01231
AL133243.2	1.08717	1.0593	2.26305
AL133245.1	0.667252	0.990663	3.45877
AL133355.1	0.667258	0.990665	2.81743
AL137798.1	1.3857	0.040911	2.43892
AL139274.2	1.44617	2.89067	3.01184
AL157394.1	0.169836	-0.401791	2.07509
AL158152.1	-1.6742	0.494696	2.54707
AL158827.2	2.02059	0.497648	0.497052
AL162171.3	3.79201	0.990662	3.8617
AL162311.1	2.07172	1.90851	1.96929
AL162586.1	0.667248	NA	3.45572
AL354714.2	0.407658	-0.548676	-1.06294
AL354892.2	3.51653	1.87511	1.88932
AL355297.2	2.56673	NA	4.26684
AL356276.2	2.33041	2.48177	3.85677
AL357055.3	3.13957	3.70579	1.94468
AL357134.1	1.4005	0.990663	3.76505
AL357140.2	4.40932	4.21654	2.86893
AL358113.1	2.08985	2.47916	2.06863
AL358334.2	NA	NA	3.45505
AL358472.4	0.196939	0.488222	2.51966
AL358942.1	1.34922	1.98905	2.23592
AL359091.4	0.493873	2.00633	1.14301
AL359510.2	2.45124	2.45505	3.4642
AL359697.1	3.11357	3.21705	3.4729
AL359706.1	3.65001	3.46473	2.99182
AL360091.1	1.46569	2.29708	-0.91907
AL365223.1	1.35132	2.44689	4.10379
AL390037.1	3.39728	2.45704	NA
AL391058.1	2.04894	2.88463	2.91649
AL392089.1	1.99177	2.05909	1.03266
AL442663.3	2.03333	-0.4038	2.14774
AL445483.1	2.43128	2.46043	3.46882
AL449283.1	2.11606	2.29914	0.530034
AL450326.1	2.84668	3.6994	NA
AL512343.2	-1.82518	-0.539993	0.352486
AL512652.1	2.89175	1.87918	3.40125
AL583856.1	-0.710192	0.513809	-0.901046
AL589182.1	2.13768	3.46448	2.914
AL589765.6	1.44654	1.80208	-0.925755
AL589880.1	0.703505	2.07682	0.495154
AL590002.1	0.965399	0.779076	0.489012
AL591895.1	2.30943	1.2749	1.09479
AL592310.1	0.667256	2.45763	3.65885
AL592424.1	-1.67769	1.49655	0.500371
AL592437.2	0.714399	0.960701	2.12411
AL596325.2	0.0465875	1.50908	2.82613
AL627171.2	3.31962	2.48652	NA
AL672207.1	1.66633	NA	3.56262
AL807752.1	2.23086	1.02192	2.02074
AL845472.1	1.04059	1.08475	2.52437
ALDH3B1	1.47904	3.2213	2.80565
AMER2	-0.0491307	-1.49769	2.02766
ANKLE1	1.47816	2.47162	NA
ANXA9	-0.712296	-0.388888	2.08203
AP000560.1	2.17094	1.74438	2.41076
AP000873.4	3.89618	4.05426	3.47437
AP001462.1	1.5319	1.10973	1.16219
AP005482.3	1.96127	2.02038	2.46122
APCDD1	1.88459	2.31902	2.30082
APOOP4	1.54365	2.48109	2.91806
AQP11	2.7256	2.56006	2.67892
AQP4	3.12354	2.88963	3.41934
ARHGEF37	1.47424	1.4634	0.450303
ARMC2	2.47322	1.74306	2.46103
ARPC3P2	1.68691	1.47878	2.57834
ASGR1	0.659314	0.758624	2.5512
ASIC3	0.71258	1.47435	2.26055
ATP8A2	0.70007	1.26346	2.04945
B4GALT1-AS1	2.14566	3.19287	3.54318
BAALC-AS1	1.38656	3.47002	NA
BDKRB2	0.167808	-0.402798	1.52458
BEST2	NA	NA	3.57618
BMPR1B-DT	0.667253	NA	4.00459
BMS1P2	1.54369	1.88985	3.02115
BMS1P8	1.00855	1.3961	0.463954
BRICD5	1.82771	1.99207	0.514568
BTBD19	-0.810147	1.39876	2.0587
BVES-AS1	1.61644	2.49525	0.551133
BX323845.3	2.55451	2.87844	3.86783
BX546450.2	1.40823	0.990663	3.55641
C11orf80	0.66725	NA	3.32532
C1QTNF3	NA	3.69873	2.91932
C1RL	-0.810671	1.73866	2.49883
C20orf204	0.667253	2.47455	3.5603
C2CD4A	0.785229	-1.91856	2.22106
C5orf66	0.667258	2.48544	3.46457
C6orf99	0.761315	0.835643	1.51586
C8orf49	1.19604	2.07671	0.494831
C9orf43	0.0953023	1.09809	-0.910707
CALHM5	3.08204	3.20679	3.96645
CATSPERB	NA	1.91239	3.46074
CBLN1	1.45346	0.539672	2.39178
CBLN3	0.0340455	2.42442	1.44492
CCDC116	0.667255	3.21444	3.46419
CCDC39	1.91237	1.48676	2.81322
CCDC87	3.36651	2.88928	3.47568
CDK2AP1	1.38578	1.74083	-0.987338
CDKN2B	0.390092	0.0255574	2.42395
CELP	NA	1.87652	1.99609
CERS6-AS1	1.38391	2.60419	2.77295
CFAP221	2.4776	2.87773	3.92055
CFAP54	1.9523	2.28981	0.531647
CFI	NA	1.89103	3.55834
CFP	1.51039	2.06374	0.494473
CHGB	1.11085	2.06942	-0.916429
CHRNB4	1.54743	1.06393	2.07178
CLDN23	-1.6782	1.50035	2.17054
COL23A1	0.637011	2.22702	2.01373
COL6A3	1.16933	1.11713	1.92886
COL6A5	2.75443	0.990661	3.56131
COMMD3-BMI1	0.100506	1.81903	2.40899
CORO2B	1.48398	2.01314	1.43773
CPEB2	0.0912	-0.238342	2.35349
CPZ	2.08653	1.08805	1.51517
CRISPLD2	1.71498	2.59136	2.41317
CSPG4P12	0.599458	1.41717	2.00881
CSRP1	1.79431	1.49572	3.15552
CXorf58	3.04997	2.46258	3.853
CYBB	1.46626	2.45469	3.3553
DDC	-0.72495	1.06945	2.53098
DDX39B-AS1	0.0902395	0.493539	2.08416
DENND1C	1.07653	1.81246	2.00518
DENND2A	0.911053	1.35428	2.09567
DES	0.667256	NA	2.81296
DHRS2	2.47744	1.97484	2.53076
DHX58	0.642793	-0.401153	2.0754
DLGAP3	3.5374	2.45809	NA
DNAH11	3.55846	3.87804	3.47571
DNAH6	1.17418	2.00025	1.49473
DNAJA1P3	0.73653	2.06912	2.12903
DND1	0.0994857	1.48801	2.00329
DPPA4	1.07476	-0.515452	-1.02971
DQX1	-0.833889	0.373801	2.35562
DUSP15	0.707079	-0.403085	2.07447
DUSP5	1.38665	1.37549	2.09597
DUSP6	-0.807361	1.41014	1.99719
EDRF1-AS1	2.73073	1.88938	2.82704
EEF1A1P14	2.20538	2.0658	3.02879
EIF3IP1	3.03187	3.67516	2.82186
EIF5A2P1	1.68681	1.06189	2.41133
ENO4	1.55634	1.88891	4.21943
ENPP2	1.89427	2.24128	2.50179
ESAM	1.40778	1.27035	2.05129
ETV5	-1.68646	1.06755	2.07534
ETV7	2.03012	0.990663	3.92391
FAM131C	1.73355	1.53592	1.0901
FAM181B	1.47517	1.79832	1.4506
FAM192BP	0.762372	0.351242	-1.04517
FAM223B	3.18864	2.8862	1.89503
FAM238C	2.81823	2.47147	3.97617
FAM66C	1.61177	1.52065	2.14071
FANK1	2.64493	3.46364	1.94079
FGF21	0.683913	-1.34267	2.19354
FGFBP1	2.51052	2.01722	1.41827
FHP1	0.691315	2.28974	1.43917
FILIP1	1.44606	1.0769	2.466
FKBP4P2	3.74067	2.46985	1.89552
FMNL1	0.7768	0.362773	2.19586
FO538757.1	2.8644	1.87695	3.53936
FOXL1	0.0494206	-0.403198	2.6531
FOXP1-IT1	NA	NA	3.45934
FOXQ1	0.939156	-1.25537	2.28401
FP236383.1	0.999871	0.267132	3.55582
FP671120.1	0.862304	-0.793966	3.37823
FRRS1	1.73667	0.982901	2.12478
FTH1P15	2.30702	1.50075	0.532443
GAPDHP1	2.40611	2.01051	-0.988556
GCNT2	2.63739	0.479592	3.12694
GCNT4	3.86666	3.20517	4.9183
GPR1	1.53967	1.07996	2.15408
GRIN2C	1.47421	1.80375	2.51022
GSEC	3.30699	3.35243	3.83294
GSPT2	2.44584	0.479736	2.20887
H19	2.58969	1.87829	NA
HAUS6P3	1.64279	1.41278	0.467898
HHIPL2	1.38675	1.91463	3.56335
HIGD1AP1	1.36214	1.24087	1.19182
HIST1H2AH	4.56754	4.33688	3.88549
HIST1H2BG	2.2459	-0.396721	-0.910981
HIST1H3J	1.35513	1.63479	0.536472
HLA-DMA	0.93284	0.319126	1.49385
HLA-DPB2	-0.709542	-0.386132	2.46921
HLA-L	2.85224	2.94136	3.27407
HMGB1P20	1.20323	0.478619	2.91796
HNRNPA1P50	0.715418	0.991024	1.3389
HNRNPH1P3	1.4869	1.89246	2.91922
HOXC12	1.95183	2.05334	2.50447
HS3ST1	0.64879	1.72214	1.7081
HSF4	1.11088	1.48083	-0.917226
HSFX4	0.66725	1.87564	3.56723
HSPA1A	2.72411	1.47516	2.69624
HSPA6	3.44863	0.990662	3.6305
HVCN1	1.41925	2.27999	0.494713
HYMAI	1.25611	1.06533	2.46545
IFIT2	3.18402	0.990662	3.46842
IGSF9	3.40584	0.990662	1.96125
IL1R1	0.695304	0.483834	2.09867
IL32	-1.68007	1.48872	2.07865
INHA	0.667254	3.45201	NA
IRF6	2.56305	0.990662	NA
ITIH4	2.61347	2.28568	2.06874
JMJD1C-AS1	2.21124	2.2524	3.45153
KBTBD11-OT1	0.978119	1.73809	0.467335
KCNB1	2.02301	1.41042	1.36749
KCND1	0.800725	2.29959	0.547836
KCNK9	-0.804623	-1.44301	3.45246
KDELC1P1	2.82308	3.69644	2.91422
KIAA1257	0.0343731	2.42461	0.427091
KLHDC7A	1.48463	1.7976	0.536101
KLHL31	0.506329	2.19343	1.33687
KLKP1	1.91147	-0.47661	3.20815
KYNU	0.0370112	-0.396454	-0.910716
LAT	1.8353	2.23192	0.437224
LILRB3	1.95643	3.20218	NA
LINC00376	0.70676	-0.403634	2.46547
LINC00574	3.25191	NA	NA
LINC00893	1.41926	2.06213	2.07093
LINC01137	0.664907	1.4055	2.94452
LINC01176	1.46652	1.0609	3.45589
LINC01197	0.727031	1.70948	2.15929
LINC01297	-0.703877	-0.38047	-0.894732
LINC01351	1.17571	-0.396111	-0.910372
LINC01426	2.08446	2.88276	2.82729
LINC01456	2.09123	2.21774	0.426596
LINC01473	1.5433	2.90633	NA
LINC01503	-0.724333	-1.36272	2.53181
LINC01852	0.667255	NA	3.92361
LINC02086	2.03359	0.990663	2.91879
LINC02166	3.32574	2.25078	3.47533
LINC02249	1.37463	2.05435	1.49399
LINC02542	1.42445	2.89368	3.55054
LRRC56	1.0849	2.80555	1.44935
LSM3P5	3.96448	3.69583	3.47786
LY6K	0.593797	1.06603	2.15532
LYPD3	1.46089	1.49258	2.52147
MAGEA6	1.16818	0.500222	2.07535
MAGEH1	1.87449	1.43074	2.42334
MAT1A	1.9946	NA	NA
MATN3	2.39081	0.482043	3.60857
MCFD2P1	3.61718	0.990662	3.46746
MIR101-1	NA	0.99066	NA
MIR101-2	-1.48968	-0.407184	-0.531982
MIR486-1	-0.148216	-0.690805	-0.634596
MIR486-2	-1.40026	-0.635641	-3.36498
MIR6723	1.04522	0.782993	2.00143
MIRLET7BHG	0.091659	-0.549896	1.1015
MIRLET7F2	-1.66988	-1.34649	1.54883
MMP1	1.44168	NA	3.4543
MORN5	0.667247	NA	3.32929
MRPS16P1	2.78204	4.20757	1.89627
MRPS21P2	1.3484	2.07202	-0.923172
MSR1	1.8211	1.00649	3.08022
MTCYBP36	-1.68198	0.505528	2.07763
MTMR9LP	0.689194	1.09415	0.498268
MTND1P14	1.91355	1.06637	2.00304
MTND3P12	1.54059	1.8919	3.45856
MTND4P24	1.47137	0.733601	1.77119
MTND5P10	-0.726073	1.49941	2.40093
MTND5P12	2.92417	3.69374	NA
MTRNR2L5	0.667252	NA	3.45764
MUC20	NA	0.990664	3.33478
MVP	-0.735028	0.487908	2.51708
MYCN	0.667249	NA	3.5665
MYO15A	2.98432	2.46939	3.92365
MYO18A	1.58171	1.32449	2.07332
MYOF	2.76926	0.990663	4.55508
MYZAP	1.60064	3.69679	2.91588
NANOS1	1.33813	-0.508995	4.32749
NAP1L4P1	0.667255	1.91116	3.55816
NAPSA	0.745005	-0.406998	1.51882
NCLP1	-0.831941	0.390459	2.48931
NDUFB4P2	1.57363	0.990663	3.36701
NECAB2	2.68387	2.4759	0.520455
NECTIN4	2.08312	2.05763	4.77588
NEUROD1	2.09901	1.80725	2.51341
NEUROD2	1.38445	1.00513	2.45366
NME2	1.97958	1.34099	-0.448229
NR2E3	1.50558	2.05908	-0.923678
NRK	0.64221	-0.400744	2.23245
NRROS	-0.811377	1.98591	2.38555
NTN4	1.89155	2.64553	2.53749
NUTM2D	3.11276	2.47934	3.53567
OAZ3	1.78296	2.13437	2.29616
ODF3L1	0.667255	NA	4.45786
OPRD1	2.38579	2.90752	3.43238
OR2AG2	2.10013	0.999898	0.424685
OR7E162P	2.33757	1.43306	1.45645
OR7E29P	-0.71182	-1.35021	2.46845
OR7E84P	1.5829	2.58172	0.41805
P2RX2	-1.6655	-1.34212	2.08726
PARD3-AS1	1.29261	0.514784	2.15704
PCDHA10	-0.204077	0.157804	2.24406
PCGF7P	2.56748	2.64463	3.32449
PDE1B	2.19635	2.46938	1.88859
PDGFRA	1.96148	1.06446	2.55783
PDPK2P	0.667277	3.25186	NA
PIFO	0.0449875	-1.16351	2.05361
PLEKHA3P1	1.80113	1.49354	1.44609
PLGLB1	-0.740082	2.47723	0.523655
PLXDC1	-0.834665	0.775947	2.24004
PLXNC1	2.38679	2.38036	1.07056
PRR16	2.20862	1.55462	1.64593
PRR34	0.66725	3.20184	3.65272
PTP4A2P2	2.76243	3.68614	3.9187
PTPRD-AS1	0.667254	2.48861	3.46016
PVALB	0.746443	0.860564	2.67677
RALGAPA1P1	3.02499	4.06535	3.59603
RASL10A	3.33736	3.88334	NA
RBM22P5	1.21247	-0.399071	2.53424
RF00002	2.18198	0.506924	1.43442
RF00026	2.30236	3.06324	0.492878
RF00100	0.207559	0.868179	1.17923
RF00432	0.0601282	0.385019	2.0428
RGPD4-AS1	0.667246	0.990662	3.45581
RGS9BP	2.03963	1.81308	2.81684
RHEBP1	0.66726	3.46318	3.62878
RIBC2	1.3317	2.42993	1.52307
RIMBP3C	2.41773	2.47313	2.57996
RN7SK	-0.291219	-1.13903	0.186025
RN7SKP203	0.723317	1.07789	1.51817
RN7SKP255	-1.40054	-0.625042	0.446604
RN7SKP71	0.244658	0.345881	0.843135
RN7SKP80	-0.698204	-1.03045	-0.427189
RNA5S17	2.0123	0.990663	3.55537
RNU1-106P	2.52145	2.89412	3.92218
RNU2-63P	3.42662	2.87547	2.91509
RNU2-6P	NA	0.990665	3.45794
RNU6-15P	1.80141	2.64789	2.46663
RNU6-48P	NA	1.8716	3.45789
RNU6-4P	1.27759	2.26192	1.53524
RNU7-41P	2.0409	3.21913	2.9177
RORA-AS1	0.593342	0.387237	2.4934
RPL11P5	1.49055	1.08028	2.13695
RPL13P2	1.70244	1.64033	1.49612
RPL17P44	-0.846714	0.376184	1.40632
RPL23AP45	3.04223	0.990663	3.92165
RPL23AP60	1.51522	1.49694	-0.919052
RPL23AP75	1.93541	1.01844	2.02473
RPL30P7	3.2733	3.47288	1.94511
RPL3P3	0.780641	1.06266	2.07202
RPL7P10	0.667257	1.87741	1.95662
RPS10P2	0.251759	-0.394871	0.499651
RPS15AP10	0.93816	2.01556	0.524099
RS1	0.667258	2.45967	3.37217
RSPH4A	1.92286	1.41705	0.42775
RWDD4P1	2.05991	1.49184	2.12344
SCARNA1	2.45944	1.80114	2.11137
SDR42E2	-1.68358	-0.398394	2.15949
SEC11B	1.18943	1.49069	1.4404
SEMA4A	2.32923	2.43345	2.805
SEMA7A	1.7871	2.51925	1.57708
SERPINC1	NA	0.990663	NA
SFN	-1.69367	0.478647	2.91808
SFPQP1	2.11238	NA	NA
SHANK2	0.667258	4.1947	NA
SHH	1.62617	NA	4.15912
SIK1	1.64004	2.24346	0.496359
SIK1B	1.9428	2.25123	0.818736
SINHCAFP2	0.667254	0.990663	NA
SKIDA1	0.652399	0.550424	2.01433
SLC19A3	1.97942	1.01676	2.42153
SLC24A2	1.9655	-0.527212	2.02394
SLC25A18	0.875173	1.36306	0.52653
SLC35D3	3.20119	2.60706	2.75118
SLC8A2	0.326296	-0.398063	2.16018
SLCO3A1	3.49002	3.21683	3.53096
SLFNL1-AS1	0.70311	2.22192	2.05995
SNORA36B	1.57053	3.46573	1.96806
SNORD3C	2.40752	2.75058	2.74028
SNORD65	2.10975	1.98487	2.4137
SNRPCP2	1.87815	0.480126	0.495329
SNX5P1	2.87646	3.68154	2.84349
SOCS3	1.40965	1.48176	2.12728
SOWAHD	3.14102	2.47156	1.88874
SPOCK1	0.108825	1.79213	2.63505
SPP1	2.21628	0.990662	3.46105
ST13P15	1.55542	1.89072	4.17059
ST8SIA5	1.12187	1.71443	2.12477
STAG3L5P	0.66726	3.2172	3.53984
STAT4	1.79379	1.79269	2.49962
STRADA	2.38929	3.89356	NA
STYK1	3.08598	1.87777	3.80838
SULT1C4	1.0392	-0.492273	2.497
SULT2B1	0.22924	-0.567834	2.52907
SUSD4	3.15252	3.16626	3.6616
SYTL2	1.18743	1.06741	1.51001
TBC1D3P1-DHX40P1	1.8078	1.05947	0.494746
TCHH	0.667256	0.990665	4.21859
TCP1P3	4.08058	2.47139	4.4695
TECTA	2.34166	0.489179	2.52088
TEKT3	2.74866	0.990662	1.96354
TERF1P1	1.31547	1.40952	3.24292
TEX45	1.39699	2.26269	1.49348
TFCP2L1	1.68847	1.39739	1.27767
TKTL1	1.36914	0.482435	0.558445
TLL2	1.5231	0.634929	2.37821
TM6SF1	1.03663	0.403916	2.43653
TMED6	1.84423	0.419997	2.06198
TMEM191B	0.951869	1.35895	0.904301
TMEM35A	1.03126	-0.401391	1.5265
TMEM86B	1.73662	1.80248	2.59588
TNFRSF25	1.22127	-0.539347	-0.519627
TNNC1	0.0482606	1.07829	0.497307
TNRC6C-AS1	0.61838	2.21202	1.34966
TPH1	0.706237	-0.404553	2.07378
TRPV2	1.7203	2.06203	0.494243
TSPAN19	1.67031	-0.470115	1.49367
TSPOAP1-AS1	2.8142	2.47341	3.0052
U62317.4	1.99471	NA	NA
UBE2D3P2	0.703837	0.353642	-1.06081
UBE2L4	2.08231	2.43276	2.02118
UNC5B-AS1	0.66488	1.07188	3.09862
VGF	1.81315	1.0918	3.478
VILL	1.68826	2.0518	1.49613
VSIG2	1.35529	-0.517232	2.34709
WBP2NL	3.01535	2.46297	1.94548
WNT2B	2.0719	1.40515	2.00566
Z82243.1	2.69064	2.05999	2.06944
Z99129.3	-0.0528218	2.55635	0.457662
ZC2HC1C	3.09193	3.20873	4.3042
ZMYND10	0.709276	2.28847	0.498261
ZNF154	-1.67308	1.50297	2.27527
ZNF18	3.42997	2.46523	3.92063
ZNF460	-0.8818	1.62955	2.31931
ZNF586	2.26116	3.02805	3.26821
ZNF669	2.43243	1.06391	3.09721
ZNF816	1.17151	1.63393	2.0559
ZNF852	2.13693	1.80769	1.44598
A1BG	-1.66374	-2.60498	-3.11924
ABCB4	-0.411995	-1.58009	-2.98058
AC000068.3	-0.289509	-3.70319	-0.890897
AC002350.1	-3.63056	-2.34537	0.1275
AC002407.1	-1.82187	-3.73465	-1.68947
AC002558.1	-0.666748	-0.900811	-2.17571
AC004816.2	-2.71805	-1.70038	-1.14953
AC004908.2	-1.36137	-0.428548	-2.59607
AC005019.1	-1.89158	-0.56558	-0.0568709
AC005041.3	-2.94668	-1.74157	-3.13753
AC005197.1	-0.756018	-2.01564	-3.41888
AC005476.2	-1.72576	-2.35429	-0.330586
AC005480.2	0.0832225	0.902086	-2.9618
AC005520.5	-1.67606	-0.542242	-3.75374
AC005921.3	-0.926804	-2.45834	-1.50375
AC005962.1	-0.650529	-0.616095	-3.33722
AC006077.2	-1.67883	-1.30258	-1.45357
AC006329.1	-0.53776	-0.416892	-2.8573
AC006386.2	-3.77112	-3.44776	-3.00023
AC006449.2	-0.132884	-3.6054	-3.15787
AC007032.1	-1.68904	-1.08342	-2.07132
AC007191.1	-1.2461	-1.14932	-0.164311
AC007249.2	-2.00411	-2.29753	-3.7101
AC007375.1	-0.710023	-0.665242	-1.98692
AC007613.1	-3.22032	-0.989477	-0.415353
AC007663.3	-0.583115	-0.856022	-0.747292
AC007952.6	-3.88964	-2.60446	-1.71629
AC008026.3	-1.70939	-0.866197	-2.86369
AC008040.5	-0.710362	-3.11093	-1.18715
AC008155.1	-0.655999	-2.18879	1.18117
AC008537.2	-1.57578	-2.5718	-0.0953872
AC008649.1	-2.193	-1.88526	-2.87474
AC008799.1	-0.575723	0.475792	-3.38945
AC009054.2	-0.762669	-2.75646	-1.31539
AC009121.2	-0.362443	-0.672577	-0.361737
AC009336.2	0.341993	0.848948	-2.5101
AC009878.1	-0.536146	-1.46746	-0.440853
AC009948.4	-0.431125	0.0158271	-3.84952
AC010245.2	-0.472954	-0.151743	-3.88249
AC010336.1	-2.18099	-2.83672	-1.81955
AC010469.1	-0.599334	-2.45638	-1.55238
AC010491.1	-1.08656	0.14379	-0.0399561
AC010619.2	-5.02599	0.0593876	-1.25113
AC010653.3	-1.82372	-2.0769	-3.48942
AC010654.1	-1.63079	-3.80378	-1.94626
AC010680.2	-0.422039	-2.93497	0.786497
AC010719.1	-1.28325	-1.20031	-2.41172
AC010834.3	-3.73789	-2.4527	0.475974
AC011330.2	-0.844728	-0.404241	-1.31347
AC011462.4	-2.02671	-0.670611	-2.65191
AC011468.1	-1.21139	-0.470017	-3.8768
AC013394.1	-2.31934	-2.82612	-0.818018
AC015909.2	-0.609841	-0.328453	-3.33476
AC016737.1	-0.468092	-2.54061	0.33606
AC016773.1	-0.809378	-1.28112	-2.26851
AC016949.1	-3.06545	-1.27046	-1.78285
AC018809.1	-2.16686	-1.19044	-0.851945
AC019205.1	-1.24638	-0.867604	-0.272661
AC020658.1	-1.0777	-0.186565	-3.17546
AC020663.3	-0.337514	-0.764957	-1.70727
AC020899.1	-1.25133	-1.27107	-1.84263
AC022382.1	-2.08023	-0.748245	-3.16447
AC022968.1	-2.05051	-0.462443	-2.2503
AC023043.4	-0.894769	-1.65897	-2.22405
AC023157.3	-0.877656	-0.263224	-2.82799
AC023908.3	-0.544263	-0.621784	-3.34092
AC025166.1	-1.72553	-0.401705	-3.81127
AC026250.1	-0.414805	-1.6479	0.390887
AC027097.2	-1.23741	-3.26643	-2.8189
AC027575.2	-0.304321	-0.919498	-0.330574
AC034198.2	-1.1696	-0.811544	-2.0984
AC062017.1	-1.27402	-1.15343	-3.10955
AC063948.1	-0.831421	-0.471647	-0.0880962
AC064807.1	-0.37148	-0.356679	-2.3358
AC064836.3	-2.69674	0.102882	-1.46458
AC064847.1	-2.07796	-2.47629	-1.47475
AC068313.1	-1.85396	-2.36285	0.117597
AC068620.2	-1.34582	-1.75142	-3.75262
AC068790.5	-2.17211	-1.85204	-1.78228
AC072061.1	-1.52033	-1.13706	-3.86484
AC074276.1	-0.877132	-3.42231	-1.50246
AC078777.1	-1.68342	-2.8444	-3.35867
AC079089.1	-2.52026	-0.337807	-0.554833
AC079089.2	-2.79379	-0.977244	-2.98464
AC079305.2	0.0321254	-0.0586163	-3.05267
AC080013.1	-0.334725	-0.967794	-0.53129
AC084125.2	-2.04926	-0.179486	-0.810576
AC084368.1	-0.839053	-0.0153526	-2.45957
AC084824.4	-0.195675	-1.16694	-2.29355
AC084880.1	-2.86753	-0.0588245	-0.545459
AC087392.1	-1.14774	-1.07573	-2.38491
AC087392.5	-2.36341	-1.32679	-0.817885
AC087477.2	-1.60444	-0.349501	-1.83113
AC087623.3	-0.703399	-1.83864	-0.770255
AC090502.4	0.527243	0.0439911	-2.09527
AC090772.3	-1.47274	-0.0621073	-2.37499
AC090948.1	-1.38308	-3.42954	-0.538045
AC091133.4	-2.07581	-1.27178	-1.53999
AC091152.4	-3.29434	-2.97093	-1.14841
AC092047.1	-3.298	-0.493638	-2.0199
AC092171.3	-2.23791	-0.536117	-0.72793
AC092354.1	-0.557299	-1.56877	-1.55179
AC092376.2	-1.62694	-1.21585	-3.63092
AC092638.2	-3.53596	-0.783045	-0.427415
AC092641.1	-0.454652	-2.56064	-0.154107
AC093155.3	-1.08799	-2.15183	-0.113536
AC093627.5	-1.07013	-0.472153	0.141699
AC095055.1	-2.22474	-0.247929	0.445759
AC096564.1	-0.844895	-0.198505	-2.00343
AC096733.2	-1.58927	-3.65896	-1.79656
AC097461.1	-0.616622	-1.48457	-3.48844
AC097468.3	-0.559256	-0.117303	-2.00189
AC097641.2	-2.18939	-1.84305	-0.254729
AC098484.2	-1.63089	-1.84336	-0.26329
AC099489.1	-1.73749	-1.40695	-3.81541
AC099791.2	-1.08842	-0.987012	-2.75646
AC103702.1	-0.334406	-1.50329	-0.494829
AC103702.2	-1.68496	-0.429164	-2.42918
AC104785.1	-2.7848	0.016891	-1.50183
AC104971.1	-4.33638	-1.15727	-2.09538
AC105250.1	-2.14176	-1.21372	-3.20892
AC105429.1	-0.778936	0.170118	-2.70374
AC105760.2	-0.444657	-0.859418	-2.42703
AC106038.1	-3.7576	-0.978531	-2.98668
AC106052.1	-0.456156	-0.474112	-2.87281
AC106786.1	-3.61887	-1.45506	-2.84797
AC106872.3	-1.52264	-2.1321	-1.68593
AC106881.1	-1.7267	-1.0861	-2.39464
AC107308.1	-0.484667	-2.45698	-1.50439
AC107398.3	0.327445	-0.15561	-2.87475
AC107890.1	-0.496456	-3.04637	-2.14082
AC108471.2	-0.664597	-2.08808	-2.03483
AC109329.1	-2.38577	-0.677844	-0.899472
AC109587.1	0.478185	-3.32876	0.0560663
AC110491.1	-0.663581	-0.819215	-2.12812
AC110768.2	-0.25135	0.10585	-2.873
AC112184.1	-1.65512	-1.28598	-2.26993
AC112220.4	-1.49611	-2.35031	-0.347741
AC112498.1	-0.87635	0.110251	-0.362407
AC113139.1	-1.09115	-1.1682	-3.17152
AC113143.1	-0.956666	-0.982762	-2.98018
AC116348.3	-0.270609	0.368522	-2.07118
AC116914.2	-1.03637	-3.43851	-2.99098
AC117440.1	-3.0645	-0.0293435	-0.20012
AC119403.1	-1.02132	-0.45582	-3.17612
AC120036.4	-2.2288	-0.675982	-0.81697
AC122688.3	-0.120056	-0.166873	0.464414
AC124242.1	-0.601915	-1.34886	-1.26129
AC125494.2	-0.38394	-0.980176	-2.97529
AC128688.2	0.16937	-0.445847	0.266238
AC128689.1	-1.859	-1.86992	-2.44487
AC129492.3	-3.1372	-0.9135	0.114335
AC130343.2	-1.05626	-0.279624	-3.69428
AC130472.1	-1.79936	-1.56917	-2.51896
AC131235.4	-1.53283	-2.30676	-1.26982
AC133550.2	-3.48331	-4.12169	-2.27397
AC133552.2	-0.437381	-0.344647	-2.47685
AC134043.2	-3.59669	-2.31152	-1.30022
AC135048.3	-0.271991	-0.801008	-2.34011
AC135279.2	-3.62924	-0.865681	-2.85832
AC135803.1	-0.505017	-2.36177	-2.87603
AC136475.7	-3.03721	-2.7138	-1.82247
AC138028.2	-3.7624	-3.43901	-1.47132
AC141002.1	-3.7627	-2.47752	-2.99178
AC141586.2	-1.85413	-2.36017	-0.350498
AC211476.2	-0.650099	0.321008	-1.79598
AC211476.4	-1.36755	-0.684972	-1.99605
AC234582.1	-2.78982	-1.56431	-1.56977
AC241377.3	-3.88449	-1.34099	-1.12494
AC242842.2	-0.781654	-0.375807	-2.82786
AC243732.1	-2.55809	-2.15658	-1.02848
AC244033.2	-2.1784	-0.534823	-0.816884
AC245014.1	-0.892614	-0.335477	-3.32385
AC245140.2	-1.75323	-1.42344	-0.978918
AC246785.3	-2.15052	-1.02307	-2.29787
ACE	-1.20032	-3.28129	-3.79555
ACE2	0.563528	-3.29574	-2.8482
ACVR2B-AS1	-0.524418	-2.56854	-0.735389
ADAMTS6	-0.557886	-1.81477	-2.38723
ADAMTS7	-2.0981	-0.867992	-0.724208
AF127577.4	-1.53295	-0.11721	-2.79334
AF131215.7	-0.64012	-0.981074	-2.9762
AGAP7P	-1.11828	-1.57908	-1.5682
AGPAT4-IT1	-1.084	-2.13401	-2.66801
AKR1B1P2	-0.580463	-1.07282	-3.4929
AL008723.1	-0.460572	-0.962251	-2.27502
AL021878.2	-3.61565	-1.0787	-2.34451
AL022068.1	-0.014066	-2.46297	-1.56356
AL022322.2	-0.872141	-1.27017	-0.816345
AL022323.4	-0.0961262	-0.343134	0.309973
AL022328.2	-1.4605	-2.47356	-2.98782
AL023806.1	-1.82358	-1.56573	-2.98255
AL024498.1	-2.32165	-0.504741	-1.12212
AL024508.2	-0.538175	-2.08491	-2.07129
AL031595.3	-0.0749715	-0.556306	-2.97012
AL034397.3	-4.33849	-3.12644	-3.04211
AL035458.2	-2.42933	-0.766006	-3.49456
AL078621.1	-0.392799	-2.36316	-0.437944
AL096701.1	-0.735072	0.0293869	-2.09761
AL109797.1	-2.78775	-0.991511	-2.97861
AL132780.5	-0.805141	0.0481478	-3.17711
AL133551.1	-1.93827	-0.645865	-0.696987
AL136162.1	0.21518	-0.0434102	-2.00246
AL136531.1	-0.6902	-0.757185	-0.0505052
AL139082.2	-1.05028	-1.38025	-2.77969
AL139089.1	-0.662014	-0.277605	-2.11612
AL139099.1	-2.15193	-1.1787	-0.808948
AL139289.2	-0.491599	0.401652	-1.49076
AL139317.2	0.501746	0.124433	-2.01222
AL139384.1	-1.92263	-3.30597	-0.5335
AL139423.1	-1.55499	-2.63928	-3.15354
AL158211.4	-0.964489	-2.90341	-0.0830413
AL158212.2	-1.22711	-1.92412	-3.35304
AL161454.1	-1.7183	-0.871144	-1.45416
AL161670.2	-0.830406	-2.36245	0.511103
AL161908.1	-1.02666	-1.27254	-1.17403
AL162258.2	-1.57416	-0.916958	-3.92345
AL353151.1	-0.290593	-0.838962	-3.25571
AL354696.2	-0.00465586	0.448652	-2.52697
AL354920.1	-0.232949	-0.822752	-3.55149
AL356273.3	-1.63379	-1.34368	-0.898966
AL357632.1	-0.486573	-0.138989	-2.87154
AL359715.1	-2.26457	-1.37472	-3.35447
AL365181.3	-3.45687	-2.23463	-2.17187
AL365226.1	-2.22354	-0.53315	-1.83278
AL390774.1	-0.373535	0.0284345	-1.76157
AL391121.1	-2.8331	-1.54196	-3.10346
AL445228.2	-0.790198	-0.877066	-1.40007
AL445231.1	-0.43691	-0.889416	0.180256
AL450309.1	-2.36588	-3.50379	-1.57934
AL451007.1	-1.0793	-1.10901	-4.33327
AL451074.2	-3.75613	-1.58963	-2.98521
AL451164.3	0.77126	-0.896955	-2.88566
AL513550.1	-1.68117	-3.63876	-0.84675
AL589765.5	-1.31593	-0.86515	-2.8627
AL589826.2	-2.59954	-0.393299	-2.7904
AL591866.1	-0.331854	-1.34313	-1.3646
AL606469.1	-1.43049	-3.55553	-0.784815
AL645568.1	-0.550222	-2.35414	-2.86841
AL645568.2	-2.56259	-1.28295	-2.27024
AL662844.4	-0.0306815	-0.261886	-0.817732
AL669831.1	-0.474448	-0.898061	-2.68851
AL807761.2	-1.37219	-3.42516	-1.50016
ALDH1L1	-1.22368	-3.08476	-0.596774
ALDH8A1	-0.455661	-1.44697	-2.86092
ALG3P1	-0.775592	-0.20472	-3.42306
ALOX5	-1.35991	-2.45797	-0.532151
ALS2CR12	-2.64898	-3.28736	-2.83983
AMIGO2	0.0133185	-0.808425	-3.80036
AMT	-2.2001	-1.74736	-3.16062
ANKDD1A	-0.170381	-0.535871	-2.67008
ANKRD20A5P	-1.78248	-3.31607	-1.45505
ANXA2P2	0.0418305	0.0788843	-3.78886
AP000223.1	-0.778592	-0.577201	-2.35353
AP000238.1	-2.65565	-1.42628	-2.8465
AP000240.1	-0.178404	-1.10794	-2.09057
AP001160.4	-0.855523	-0.149495	-3.55581
AP002986.1	-0.423244	-0.761008	-2.03915
AP003068.4	-3.30276	-0.28246	-1.05673
AP003352.1	-2.0691	-1.13937	1.30496
AP003469.4	-1.10597	-0.148069	-4.25547
AP003733.4	-1.93948	-1.68492	-1.61079
APCDD1L	-3.62505	-1.43936	-2.85413
ARAP3	-0.117789	-0.754823	-2.30016
AREG	-0.0710458	-2.8213	-1.87092
ARHGAP8	-0.132244	-0.506303	-2.0408
ARHGEF19	-0.729897	0.15342	-0.525923
ARRDC3-AS1	-1.63318	-1.75034	-2.33441
ART4	-0.971068	-0.664313	-3.064
ASNSP4	-2.96381	-1.15714	-3.15467
ASS1P9	-1.59218	-2.74121	-0.74557
ATG16L2	-0.409394	-0.351674	-2.99047
ATP6V1G2	-2.26514	-0.190307	-1.54068
AXL	-3.97011	-1.17037	-0.757882
BCDIN3D-AS1	-1.55316	-1.58127	-2.55888
BDNF	-3.62188	-2.33671	-2.85097
BDNF-AS	-0.461566	-0.430426	-0.831394
BISPR	-3.17345	-2.85004	-1.86324
BMP2	-0.845668	-0.077585	-3.13278
BMS1P15	-0.367557	0.771754	-2.9623
BMS1P22	-0.173136	-1.25964	-0.76359
BMS1P4	-1.50903	-1.22097	-2.23033
BNC2-AS1	-2.78757	-0.568649	-1.56568
BOK	-0.927615	-2.31023	-0.866624
BOLA3P2	-2.67468	-2.32491	-2.25282
BTG3-AS1	-0.716423	-0.226169	-2.79259
BX649601.1	-1.13255	-0.954196	-2.27243
C10orf82	-0.565739	-0.431315	-2.1999
C10orf95	-1.5709	-1.27711	-1.24665
C11orf65	-0.894835	0.239847	-2.04376
C15orf48	0.912077	0.266707	-2.03262
C22orf24	-1.05528	-1.17728	-0.730523
C2CD4C	-0.842955	0.347629	-1.40677
C3	-0.605484	-2.46109	-1.50205
C5orf49	-1.79202	-0.983491	-0.530258
C6orf141	-0.86396	-1.46237	-2.86588
C9orf139	-0.422811	-0.168258	-4.0417
CA14	-0.638596	-2.48158	0.575385
CALHM2	0.255514	-0.133171	-2.28117
CALM1P1	-2.1141	-0.182956	-0.742173
CASC9	-0.305163	-3.63199	-0.747092
CCBE1	-0.481657	0.486686	-2.48015
CCDC110	-0.504355	-0.482735	-2.24618
CCDC78	-4.02654	-0.527998	0.134041
CCSER1	-0.46321	-2.37582	1.13822
CD44	0.0242833	0.371677	-3.03183
CD68	-0.373773	-1.01776	-3.41619
CD8A	-2.58313	-2.21741	-0.220537
CDH15	-3.29127	-1.35586	-2.93992
CDH22	-1.46492	-3.28902	-2.84149
CDKN2A-DT	-0.801556	0.337159	-2.88017
CDYL2	-2.5089	-4.65474	-2.78717
CEBPA-DT	-1.26777	-2.75395	-1.03321
CEBPB-AS1	-0.441131	-1.46805	0.510306
CFAP100	-2.79784	-1.57018	-1.58547
CFH	-0.965513	-2.23065	0.32278
CHAC1	-1.28845	-1.24007	-2.03215
CHCHD2P2	-0.218807	-0.876073	-3.60492
CHST1	0.20477	-0.157101	-2.88645
CHST9	-0.699233	-2.08779	-1.78815
CKS1BP2	-1.51026	-3.60415	-4.11841
CLDN10	-2.78899	-1.57642	-2.97985
CLMP	-0.276143	0.319662	-2.34112
CLUL1	-0.850037	0.46419	-3.64473
CNTNAP1	-0.75643	-2.00946	-0.256496
CNTNAP3	-4.4094	-0.381788	-1.1641
COL9A2	-1.14379	-0.593935	-3.81388
COPS8P2	-1.46892	-1.87265	-3.86768
CPT1B	-1.10772	-1.28594	-2.26712
CRB3	-0.794058	-2.36063	-0.516533
CRYM-AS1	-4.11555	-0.938187	-1.87227
CU638689.5	-1.63562	-2.14763	-1.15762
CXXC4	-0.789445	-0.465251	-2.265
CYP1A1	-1.02434	-0.763384	-2.03406
CYS1	-3.36702	-1.56286	-0.213018
DAND5	-1.28006	-1.42628	-3.41097
DCN	-1.11285	-2.33937	-2.85363
DDIT3	-2.36242	-2.104	-2.08491
DDX58	-0.570013	-0.486419	-2.7936
DERL3	-2.36373	-2.1538	-2.75123
DHDH	-0.963048	-1.48504	-0.818652
DINOL	-2.88784	-4.00971	0.369088
DIP2A-IT1	-1.2254	-0.898001	-3.64174
DIRAS3	-0.357432	-0.768295	-2.07092
DLX3	-0.892499	-0.989997	-2.97428
DNAH1	-3.17664	-1.80493	-0.504436
DNAH10OS	-3.46181	-1.64488	-2.17178
DNAJB7	-2.66289	-2.33949	-0.277159
DNAJC15	-0.562872	-0.534289	-4.74889
DOCK9-DT	-2.18975	-1.0129	-0.310984
DZANK1	-2.09819	-0.96995	-0.360096
EDA2R	-2.11385	-0.985946	-0.200141
EDNRB	0.0876883	-1.13165	-2.11263
EGFL8	-3.06538	-0.84813	-0.336473
EGR2	-1.32536	-2.89318	-0.966394
EIF4HP1	-2.1891	-2.74103	0.488535
ENO1-AS1	-1.15405	-0.800973	-2.34818
ENO3	-1.10302	-0.336826	-2.32063
EPHA5	0.599193	0.847238	-3.01736
EPHA5-AS1	-0.431629	-0.89268	-2.16245
ERBB4	-1.53922	-0.675779	-0.975217
EXOC1L	0.551013	-2.37811	0.0135405
EYS	-0.908067	-2.51863	-2.50163
FAAH2	-1.78734	-2.33872	-1.45019
FAM110C	-3.90603	-2.62086	-3.13512
FAM110D	-2.07595	-0.418387	-0.630077
FAM131B	-2.79086	-1.00008	-1.49532
FAM136BP	-0.00479998	-0.138949	-0.00343247
FAM167A	-0.858259	-0.335311	-2.12714
FAM169B	-0.546591	-1.14714	-2.13312
FAM185BP	-1.34518	0.299472	-0.984764
FAM196A	-2.11985	-1.76411	0.276791
FAM201A	-0.315981	-0.740993	-0.744433
FAM214B	-0.12635	-2.98566	0.498993
FAM86FP	-0.841363	-0.459572	-2.85912
FAR2P2	-2.78738	-2.46397	0.0911952
FBXL13	-1.52969	-2.63644	-1.74265
FBXO2	-2.23431	-0.256849	-0.507673
FDPSP1	-2.6836	-2.3602	0.119135
FES	-2.53571	-1.15294	-2.14196
FGF12	-0.443713	-0.682337	-2.40127
FGF13	-1.59744	-2.65771	-0.65243
FGF7	-1.86014	-0.857607	-2.8556
FHAD1	0.785607	0.835392	-2.89818
FLNB-AS1	-2.21844	-2.15818	-0.572021
FO393409.1	-2.92831	-1.70038	-3.11917
FOCAD-AS1	-2.21843	-0.196679	-1.99475
FOXD4L6	0.230126	-1.78249	-0.18859
FOXP3	-2.03599	-1.57943	-0.0819242
FRG1KP	-2.50895	-2.97526	0.253524
FSIP2	-0.798133	-2.3635	0.181499
FST	0.396579	-2.51394	0.494513
FTH1P3	-1.21136	-1.4253	-2.54281
FTLP2	-0.692889	-0.588093	-2.00668
FUT1	-0.894894	-0.586321	-2.97954
GDF6	-0.0610689	-0.167798	-3.74846
GDNF-AS1	-1.77693	-0.470569	-1.4539
GMFG	0.39182	-1.05044	-1.62379
GOLGA6L5P	-1.4168	-1.84694	-2.83043
GPSM3	-0.865043	-0.463123	-1.29343
GRID2	-3.49339	-3.16998	-2.26964
H2BFS	-0.0815257	-0.495619	-2.04291
HAS2	-0.827477	-2.07582	-3.49008
HBZ	-0.978396	-1.35474	-3.34784
HCG17	-2.67355	-0.871511	-0.421045
HCN4	-1.48786	-1.48745	-2.02553
HERC2P3	-0.881589	-2.70369	-1.07358
HERPUD1	-1.97952	-1.78	-2.00652
HIST1H2BH	-2.56281	-1.2361	-1.13865
HIST3H2BB	-1.40731	-1.41137	-2.19476
HMGN4	-1.20533	-0.0285406	-2.1841
HNRNPRP1	-0.0230776	-1.49377	-3.4944
HSFX3	-1.67673	-0.544609	-2.32941
HSP90B3P	-2.02445	-1.33283	-1.11176
HSPB9	-2.25886	-0.846578	-0.81749
IDI2-AS1	0.102714	-2.34473	-1.45167
IFITM10	-0.538543	-2.51784	-1.44851
IGSF11	-0.748135	-1.42586	-3.4209
IKZF3	-0.293877	0.500089	-3.49464
IL17RC	-2.22436	-0.847752	-0.817573
IL18BP	-1.13257	0.108496	0.510349
INHBE	-0.405701	-0.227617	-2.01279
IRX6	0.308708	-0.485673	-3.70144
ITGA4	-0.580932	-0.109789	-2.41774
ITIH5	-0.440516	-2.35947	-1.4036
IZUMO4	-1.28565	-3.05484	-3.5691
JAM2	-0.97396	-0.891975	-2.1382
KC877982.1	-1.54445	-1.0495	-0.514501
KCNIP2	-1.23229	-0.203589	-1.7687
KCNIP4	-0.0978806	0.438749	-2.96904
KCNQ1	0.125476	-0.331021	-2.1201
KCNS3	0.341391	-0.187199	-2.16876
KHSRPP1	-1.63886	-3.29337	-2.84584
KIAA0825	-0.921668	-1.81916	-3.80355
KIAA1614	-1.58986	-3.70345	-0.815936
KIAA2012	-1.49295	-1.25911	-1.8391
KIF25	-1.62514	-0.758733	-1.53839
KIF9-AS1	-0.625984	-0.495665	-1.06003
KLHL30	-2.68417	-1.46242	0.0507226
KLHL32	-1.23323	-1.5479	-3.945
KLHL41	-2.3421	-0.97993	-0.926599
KRT17	-3.78325	-1.97912	-1.59223
KRT18P17	-2.12221	-0.530757	-1.37414
KRT18P18	-1.20731	-3.27246	-2.82493
KRT18P8	-1.99453	-3.05088	-1.12476
L3MBTL4	-1.52509	-2.68276	-1.71578
LAMTOR5P1	0.219901	-0.819734	-2.60469
LDHD	-1.50786	-3.11201	0.32291
LEF1-AS1	-1.36987	-0.697881	-3.41647
LEFTY1	-2.79779	-2.47438	-2.98864
LGI4	-1.16115	-0.841003	-1.0489
LINC00853	-0.68692	-1.75961	-2.29894
LINC00896	-1.76375	-1.19173	-2.16018
LINC00997	-0.940832	-0.931321	-2.14365
LINC01144	-0.125365	-0.427185	-2.72397
LINC01152	-1.13092	-1.39593	-3.81958
LINC01337	-2.78634	-1.57564	-1.50056
LINC01341	-3.37175	-1.15429	-0.567623
LINC01411	-2.50565	-0.867031	0.896896
LINC01759	-2.10603	-0.285343	0.714487
LINC01977	-2.39864	0.296357	-2.00847
LINC02044	-2.65962	-1.45812	-2.85048
LINC02193	-0.0422652	-0.223733	-2.96493
LINC02298	-3.08178	-0.706769	-2.66921
LINC02352	-1.40348	-2.0701	-0.494782
LMO7-AS1	-3.838	0.340595	-1.64962
LRMDA	-0.822825	-0.706719	-2.00736
LRRC73	-1.50577	-1.87408	-2.41561
LRRK2	0.137225	0.160924	-3.25382
LUM	-1.79946	-2.36393	0.51077
MAOB	-1.57648	-0.924837	-3.34227
MAPK13	-0.968113	0.0324281	-2.09765
MATN4	-1.43995	-0.645285	-3.06365
MCF2L	-0.799841	-1.0819	-2.9819
MIR101-2	-1.48968	-0.407184	-0.531982
MIR103A2	-1.2967	-0.750902	-0.00608518
MIR1254-1	-0.14927	-1.46616	-2.86361
MIR16-1	-1.97535	-2.87713	-2.86119
MIR16-2	-2.76748	-1.94788	-1.81556
MIR191	-3.2726	-2.94919	-2.05721
MIR30C2	-3.64192	-3.31858	-2.87105
MIR30E	-3.92001	-1.14981	-3.14917
MIR374B	-3.6261	-2.34093	-1.28801
MIR451A	-1.71687	-2.42134	-5.8555
MIR486-2	-1.40026	-0.635641	-3.36498
MIRLET7F1	-3.38218	-3.05878	-3.57304
MIRLET7G	-2.65452	-3.29291	-2.84538
MMP23A	-2.03227	-1.09266	-3.09937
MMP23B	-4.33004	-1.14572	-0.0658582
MMP9	-2.95963	-1.73641	-3.15048
MOB3C	-3.44124	-2.21795	-2.16788
MPV17L	-4.0298	-3.70644	-3.25891
MPZL2	-2.28358	-3.46435	-0.234694
MRPL2P1	-1.37476	-0.711535	-1.90363
MTMR7	0.472056	0.367083	-3.50131
MYOD1	-1.24573	-1.13321	-2.40676
MYOM2	-1.81236	-0.913862	-0.867522
N4BP2L1	0.297056	0.328301	-4.0847
NBEAP3	-0.842352	0.511103	0.151939
NDUFA4L2	-0.608444	-0.19939	-0.989281
NEURL2	-0.589958	-0.980068	-1.1593
NEUROG2	-1.34697	-2.52609	-0.525987
NGFR	-0.0977736	-3.07756	0.124331
NIFKP6	-2.22674	-2.51696	-0.0987275
NOTCH4	-1.24143	-1.57645	-2.97782
NPM1P46	-0.571576	-1.25753	-2.80629
NPM1P48	-0.657752	-1.26827	-2.22465
NPPA-AS1	0.386362	-0.338982	0.0258964
NR2F2-AS1	-4.02141	-1.22341	-1.72144
NT5E	-1.67075	-1.92078	-1.87076
NTNG1	-1.97331	-0.632801	-1.28317
NTS	-0.433566	-2.01573	0.593648
NUTF2P2	-0.936231	-1.91361	-0.820166
NWD2	-0.579292	-0.218718	-0.991305
NYAP1	-1.89089	-1.58234	-1.56893
ODF3L2	-0.634088	-0.563414	-1.55663
OR7E158P	-0.94106	-0.809445	-2.80191
OR7E21P	-0.300595	-0.764432	-2.7574
OR7E53P	-0.632497	-2.46702	-1.49594
OSBPL7	-0.807043	-0.56831	-2.01307
OSTN	-0.347867	-0.012883	-1.6479
OXTR	-0.194312	0.108064	-0.513317
P4HA3	-2.00695	-3.54724	-3.09971
PADI2	-0.405226	-2.28954	-0.239478
PALM2	-1.50863	-2.23023	-0.242449
PAUPAR	-0.421524	-1.8245	-3.12612
PCDH19	0.137741	0.102042	-2.4443
PCDHB13	-1.89096	-1.57654	-2.97995
PDCD4-AS1	-0.428018	-0.90872	-2.21357
PFN4	-0.0189748	-3.41865	-1.50444
PHBP20	-1.03316	-0.880604	-2.45375
PHBP21	-1.49498	-2.97372	-3.48798
PILRA	-3.86118	-1.67782	0.603567
PILRB	-1.14319	-1.08066	-2.07063
PKD2L2	-2.67409	-2.35068	-1.45365
PKN2-AS1	-2.57432	-1.1745	-1.78819
PLA2G4C-AS1	-3.63238	-2.34722	-2.86149
PLCB2	-2.1011	-0.912293	-1.641
PLEKHA6	-2.67874	-3.31713	-0.427854
PLIN5	-1.5588	-0.968627	-4.37764
PLPPR4	-1.11218	-3.86457	-1.3757
PNCK	-1.12626	-0.822622	-2.80702
PNMT	-0.412923	-1.27426	-0.735731
PNPT1P1	-1.20886	-2.7414	-3.25566
POC1B-AS1	0.162102	-0.0114772	-2.32036
POU2F2	-2.859	-1.18977	-2.49906
PPL	-3.64457	-1.47105	0.511799
PPP1R1C	-2.68188	-1.47033	0.191494
PPP1R27	-1.31471	0.0843593	-3.33165
PRR15	-2.8381	0.372329	-0.592925
PRRT1	0.163636	-0.532819	-3.25491
PRSS37	-3.64192	-3.31858	-2.87105
PSD	-0.746162	0.341984	-2.87535
PSMB9	-0.916926	-1.13215	-1.42951
PTF1A	0.32132	-0.598183	-0.939862
PTGER2	-0.828761	-0.510806	-0.886368
PTGFR	0.628989	0.322577	-2.89312
PTHLH	-1.12254	-1.68177	-2.22504
PTOV1-AS1	0.184483	-2.51777	0.0732029
PTP4A2P1	-0.253668	-0.392878	-2.17864
PTPN6	-1.56581	-2.83605	-1.8718
PTPRN2	-3.06416	0.14612	-0.256867
PYGM	-0.785859	-0.988345	-2.98355
RAB28P5	-1.3023	-0.947269	-1.83613
RAB38	-2.9553	-1.74448	-3.14616
RAB39A	-1.4503	-1.07946	-2.62021
RAB41	-0.382136	-0.285601	-2.03526
RCN1P2	-3.6254	-2.34021	-0.538974
RCN3	0.356669	-2.44867	0.478537
RF00092	-3.62043	-1.43411	-2.84951
RFPL3S	-0.662222	-2.80838	-0.885743
RHOQP1	-1.26477	-3.42089	0.821102
RIMS2	-0.2579	-0.0568542	-0.0446796
RIPOR2	-3.06422	-1.2679	0.139066
RN7SL521P	-1.43685	-0.561188	-2.86303
RNU6-13P	-2.39244	-1.50332	-1.08936
RNU6-41P	-2.16451	-0.851829	-0.457401
RNU6-94P	-1.08584	-2.57419	-1.60829
RNY4P10	-1.98945	-0.798445	-1.0867
RNY4P27	-3.63975	-3.3164	-2.86888
RNY4P7	-4.80334	-1.03117	-2.57299
RPL12P41	-0.0429831	0.352442	-2.87374
RPL21P10	-1.18368	-1.6834	-3.08713
RPL22P11	-2.68485	-2.36144	0.118415
RPL22P16	-1.74481	-2.01076	-1.05363
RPL23AP53	-1.07142	-3.18217	-1.25979
RPL29P30	-0.886176	-1.04649	-2.61339
RPL31P35	-0.548419	-2.3606	-1.40609
RPL5P11	-3.06429	-1.25352	0.187136
RPL6P30	-0.113151	-1.55541	-1.11941
RPL7AP31	-2.17607	-1.27054	-0.816135
RPL7AP57	0.181346	-0.895973	0.610316
RPL9P29	-1.17875	-0.481277	-2.07166
RPS20P24	0.373646	-0.46385	-0.19211
RPS23P5	-2.79445	-1.56777	-2.98531
RPS24P7	-4.02205	-3.69867	-3.25114
RPS27AP6	-0.926927	-1.02418	-0.296665
RPS3AP36	-0.506638	-0.101033	-3.08922
RPS3AP37	-0.701973	-2.34459	-2.85886
RPS7P6	-1.06593	-2.74269	-3.25695
RPS8P4	-1.01828	-0.190884	-3.92447
RPSAP3	-0.586606	0.0238212	-0.454083
RPSAP70	-0.471311	-0.955715	-0.310912
RSPO4	-3.63368	-3.31032	-2.86279
RUNDC3A	-1.22933	-3.60376	-0.0928889
S100A4	-1.50967	-0.608133	-2.76023
S100P	-1.59821	-1.69784	0.210743
SALL4	-1.40949	-1.11313	-2.05528
SATL1	-1.6625	-2.3568	-0.519768
SCIN	-2.30564	-0.93913	-1.56312
SCN2B	-1.1308	-2.75733	-1.07306
SCUBE1	-1.06911	-1.08129	-0.448388
SEMA3B	-0.293035	0.0447869	-2.95978
SEMA6B	-0.861933	-2.73172	-2.32529
SEPT7P8	-1.7847	-3.29649	-2.84896
SH2D6	-4.02884	-1.84272	-3.25792
SH3D21	-1.13839	-0.94983	-2.27119
SINHCAFP3	0.00641017	0.316418	-2.89018
SKOR1	-1.42973	-1.08658	-3.08171
SLC10A5	-1.05612	-1.0807	-2.35221
SLC11A1	-0.57202	-0.959357	-2.97423
SLC12A5-AS1	-1.10944	-0.793343	0.230561
SLC22A31	-0.874632	-0.693544	-3.69452
SLC26A1	-0.807125	-0.185907	-3.41762
SLC30A10	-2.20399	-3.35205	-3.86631
SLC6A1	-1.2377	-2.30483	-2.8191
SLC6A16	0.0880636	0.0377143	1.04059
SLCO4A1-AS1	-1.78259	-3.44257	-2.99504
SMAD5-AS1	-1.28525	-2.66212	-0.727574
SMC5-AS1	-3.63626	-2.35108	-0.422277
SNED1	-0.436295	0.147677	-3.06118
SNORC	-0.365096	-2.1279	-2.6915
SNORD4B	-3.06569	-1.84084	-1.84319
SNORD5	-1.20459	-1.56996	0.471169
SNORD6	-2.18923	-0.260833	0.186707
SNRPCP4	-1.19364	-0.88107	-0.422755
SOCS2-AS1	-1.56518	-0.458522	-3.18797
SORCS1	-1.50673	-0.664641	-1.02827
SP2-AS1	-0.203679	-0.224024	-2.01258
SP6	-0.463177	-3.18284	-1.26068
SPATA4	-1.34625	-0.708532	-1.70139
ST7-AS1	-0.999767	-0.788357	-1.62142
STAC3	-1.85675	-2.11421	-3.52746
STIP1P3	-0.524866	-1.56256	-2.97551
SUGT1P3	-0.961268	-1.88496	-2.18126
SULT1A3	-0.652867	-1.34362	-2.652
SULT2A1	0.674114	-2.37324	-1.46452
SUMO1P4	-1.94827	-3.29444	-2.84691
SUMO2P6	-0.0144734	-1.5674	-2.97236
SYNPO	-2.09866	-3.61336	-0.173394
TAT-AS1	-1.72926	-0.924624	-1.94025
TBC1D3H	-0.431661	-0.879238	-2.87606
TBC1D8	-1.47796	-0.505701	-2.47334
TBX19	-1.1175	-0.92871	-2.49937
TCP11L2	-2.78877	-0.994995	-0.6389
TDH	0.132846	-0.366241	-3.09245
TEKT2	-0.189239	-0.889313	-2.15945
TERT	-0.20019	0.411673	-2.13884
TGFB2	-0.176443	0.0704807	-3.92509
TGFB2-AS1	-1.20596	-0.846503	-2.855
THBD	-3.09096	-2.19318	-4.17816
THSD7A	-0.892111	-1.57082	-2.97343
TLE2	-2.04914	-0.656863	-0.897798
TLE6	-1.68852	-1.92639	-2.87955
TLR3	-1.77755	-3.28693	-2.83939
TMC3	-3.63056	-2.40891	-0.760871
TMEM132E	-0.431718	-0.760971	-4.16494
TMEM151A	-2.01176	-3.11466	-2.16652
TMEM202-AS1	-1.55115	-0.857794	-3.25584
TMEM217	-1.83964	-0.999919	-3.4139
TMEM221	-1.21458	-0.11971	-2.67006
TMEM225B	-0.300657	-0.516099	-3.19826
TMEM63C	-0.0955036	-0.890375	-2.00261
TMIE	-1.31945	-2.34576	-2.86002
TMPOP2	-1.5412	-3.10256	-1.1799
TNFSF4	-0.695734	-2.08779	-2.07081
TOB1-AS1	-0.837299	-1.0434	-2.12636
TOB2P1	-1.73073	-1.1756	-2.74058
TRAF1	-2.06909	-1.73136	-0.489223
TRHDE	-1.20928	-1.56705	-2.83542
TRPA1	-2.09236	-1.76706	-1.70537
TTC41P	-1.25722	-2.46666	-2.98092
TTTY15	-1.73233	-2.35633	-0.429155
TUBG1P	-0.496919	-1.39956	-3.81282
U47924.2	-0.0756076	-0.660519	-2.23201
UBAP1L	-0.3732	-0.772693	-0.734704
UBE2CP3	-0.644681	-1.00639	-2.96513
UBE2V1P2	-0.844717	-2.0192	-0.425157
UCP3	-2.66376	-2.34035	-2.85462
UNC13A	-1.77825	-0.887009	-4.6133
UNC5A	-0.837	-1.197	0.255745
UPF3AP1	-0.76521	-0.347402	-2.47593
URAD	-1.85538	0.361356	-2.86705
URAHP	-0.978156	-1.28284	-0.697282
USH2A	0.00826869	-2.4595	-2.97376
VIPR1	0.0125192	-0.585133	-2.38845
VSTM2L	-0.80219	-0.17021	-3.17355
WDR11-AS1	-2.30949	-1.33292	0.841582
XYLT1	-2.43272	-2.00433	-1.28565
Z83851.2	-0.218287	-1.08654	-2.03857
ZNF385C	-0.827657	-2.29343	-0.602332
ZNF471	-0.635668	-2.74186	-1.83996
ZNF506	-0.659874	0.177577	-3.0338
ZNF582-AS1	-1.25171	-1.39776	-0.405671
ZNF596	-0.122382	-0.181817	-1.09887
