# Supplementary material for: MLL-AF4 and a murinized pSer-variant thereof are turning on the nucleolar stress pathway
Source: Cell Biosci. 2022 Apr 25;12:47. doi: 10.1186/s13578-022-00781-y (PMC9036721; doi:10.1186/s13578-022-00781-y)
Supplement: Supplementary file 7 — Additional file 7: Heatmap dataset 2. [file 13578_2022_781_MOESM7_ESM.xlsx]

## Sheet: Sheet1
gene symbol	MA4m	A4M	COm
AANAT	1.18805	2.07691	1.60378
ABCG4	-0.879136	2.42948	2.01179
ABCG5	2.17088	3.47169	0.330019
AC002310.2	2.16319	3.46431	1.53764
AC004067.1	1.98174	2.28564	2.35525
AC004080.4	1.93983	2.01349	2.65518
AC004130.1	1.09704	1.71693	2.12277
AC004854.2	1.5072	1.08027	1.25057
AC005034.4	1.50814	2.08607	1.25517
AC005332.1	1.58218	2.48486	1.95877
AC005534.1	0.192596	1.08199	0.488303
AC005865.2	1.98496	2.64773	0.699011
AC006213.1	2.9069	0.990664	2.80209
AC006277.1	1.90977	1.57884	1.33284
AC006450.3	1.69802	2.1532	1.68881
AC006511.5	1.58217	NA	2.73455
AC006557.6	0.06388	0.950869	-1.18991
AC006963.1	1.50627	1.06979	1.03459
AC006978.2	0.578236	0.990663	1.45066
AC007250.1	2.90244	4.06064	2.39967
AC007375.3	2.00455	1.09063	1.18632
AC007390.2	1.1811	0.506422	2.12832
AC007570.1	2.5822	2.88294	2.16121
AC007686.1	1.57351	3.20312	1.98284
AC007823.1	2.16423	2.88183	3.62261
AC008280.3	3.58578	0.990663	3.26966
AC008397.2	NA	NA	3.02152
AC008543.1	1.1777	2.65608	1.61999
AC008555.8	1.22049	1.84781	1.76455
AC008969.1	1.18512	2.08159	1.56578
AC008972.1	0.57901	3.70201	1.98567
AC008993.1	1.42724	2.20188	1.16992
AC009021.1	0.763534	2.48178	1.13915
AC009088.1	2.35045	0.492013	0.839878
AC009120.5	1.20275	1.06573	-0.260775
AC009268.2	0.192024	-0.399487	-1.05999
AC009269.4	1.08711	2.21392	1.55938
AC009533.1	0.587108	0.990662	0.372171
AC010422.6	2.58958	2.43222	2.09349
AC010525.1	0.587261	1.87834	2.10803
AC010542.4	1.69328	1.73142	0.0915931
AC010624.1	NA	NA	1.50413
AC010683.1	1.85088	2.17171	2.12671
AC010884.1	3.38182	2.88621	3.15709
AC011005.1	3.75063	1.88895	3.87789
AC011270.1	1.50129	2.29601	1.90193
AC011405.1	-0.806285	2.07723	-0.259997
AC011466.4	2.48624	3.79145	3.47181
AC011773.1	1.58223	NA	NA
AC011997.1	0.0737072	-0.508855	0.83276
AC012358.3	2.19379	1.0632	1.74284
AC012640.5	1.77355	0.493316	0.687191
AC013476.1	2.01444	0.493176	-0.259602
AC013731.1	2.58218	1.89084	3.25992
AC015911.7	NA	NA	NA
AC016397.2	2.63506	1.47141	1.63245
AC016629.3	1.18994	0.499804	0.673859
AC017083.3	1.16074	1.04317	0.911286
AC020907.2	1.49646	2.07689	1.50191
AC020916.1	1.06433	0.973458	0.355864
AC021086.1	1.77697	1.06962	-1.0572
AC022211.2	2.58218	2.8833	3.3022
AC022400.5	0.586354	1.89303	1.48378
AC022400.9	2.28395	0.991455	2.11787
AC022417.1	-0.81355	2.30083	1.66821
AC023983.1	0.182164	0.489171	0.0974611
AC024937.2	1.40002	1.38435	0.7699
AC025048.2	1.17283	1.79956	1.21305
AC025048.4	2.27858	0.999342	1.37347
AC025263.2	-0.979799	0.315081	-1.17925
AC025287.2	1.51257	0.486648	0.676532
AC026726.1	1.17991	-0.406215	0.414267
AC027288.3	2.20098	0.493548	-1.05484
AC027601.3	-2.23825	2.31151	-1.00056
AC027612.3	4.16474	2.47149	2.43246
AC034229.4	0.759643	2.07199	0.237829
AC036176.1	1.71146	2.23636	2.58078
AC040160.1	0.696034	1.99648	0.247155
AC040169.3	0.212935	-0.390007	-0.259494
AC046130.1	1.94902	2.89493	2.54901
AC051619.6	-0.804474	1.08123	-1.02468
AC055733.1	2.29485	2.2913	1.79701
AC062028.2	1.23423	1.12688	1.50312
AC068792.1	1.44507	1.43296	1.08373
AC069281.2	0.191284	2.29537	-0.373832
AC073352.1	1.7615	2.0565	1.69002
AC079174.2	2.05713	0.957864	0.349638
AC079322.1	1.18645	2.06425	1.84527
AC084125.4	-0.751345	2.01493	-0.533996
AC084757.2	0.689259	0.988792	0.900598
AC087499.4	3.58792	4.20839	3.42372
AC087742.1	1.50153	1.06185	2.02519
AC090152.1	2.90136	1.89034	3.42693
AC090360.1	1.50772	2.29395	1.02752
AC090517.2	2.44949	1.42443	1.8606
AC090673.1	1.50206	1.0655	1.76632
AC090912.2	-0.813581	1.07316	2.17521
AC091167.4	0.766984	1.07013	1.89968
AC092642.1	2.06386	0.366917	1.20104
AC092933.1	2.18778	0.497212	1.24242
AC093512.1	1.19638	1.06974	2.06035
AC096642.1	0.579844	3.21046	1.62271
AC096649.2	2.17134	NA	2.63533
AC097724.1	3.39729	2.44404	0.31325
AC098479.1	3.39149	0.990663	3.10475
AC098820.1	3.15795	0.990661	2.55749
AC100757.1	1.39463	2.44159	2.37402
AC100793.4	1.50433	1.49458	0.235502
AC104041.1	0.772387	-1.35309	0.758463
AC104581.4	1.18909	1.48482	1.67221
AC104759.1	1.5822	NA	2.16884
AC106047.1	0.569703	2.44416	1.15975
AC107214.2	-0.320632	1.40433	1.65988
AC107959.2	0.137057	0.439687	0.675708
AC109992.1	0.585458	1.8895	3.37832
AC110792.3	1.59139	4.05779	1.12975
AC112220.2	2.29478	2.23919	2.18819
AC112240.1	3.39202	1.91787	2.53597
AC114482.1	2.16358	2.90161	1.33409
AC116351.1	0.180966	1.47111	2.40569
AC116407.4	1.18994	1.08412	0.411794
AC116535.1	0.0969619	0.988159	-0.178041
AC116562.4	1.98717	1.07081	2.02512
AC116565.2	0.765532	1.81301	0.969543
AC118344.1	3.57846	0.990664	2.42549
AC124944.2	2.35721	1.07203	1.03467
AC125437.1	2.16528	1.14962	0.717796
AC125611.4	3.39141	2.8758	2.56339
AC129492.5	3.58627	0.990663	1.69678
AC131212.1	2.90196	3.48263	2.77907
AC131212.2	0.579794	0.990663	2.89354
AC135050.7	1.50188	1.4847	1.8791
AC136604.3	2.29505	1.75934	2.8139
AC136632.2	0.197766	-0.393761	-0.259883
AC137630.2	1.76536	1.06189	1.72136
AC138409.2	2.17365	2.6449	1.47288
AC140134.1	2.58219	3.69798	1.80705
AC145343.1	2.90144	NA	2.27585
AC146507.1	2.57494	3.4752	2.02923
AC146944.2	0.641791	0.386635	1.2644
AC147067.1	2.005	-0.400031	0.654817
AC148477.3	2.22296	-1.49509	1.33492
AC211476.3	0.782238	0.51712	2.3164
AC211486.3	3.39569	2.46125	1.24529
AC239799.2	0.108546	0.997864	1.82899
AC242842.1	-0.795431	0.511338	-1.01015
AC243830.3	-2.23637	-0.38519	-0.41586
AC243960.2	0.781379	-0.398864	1.55896
ACOT11	3.57958	4.68553	3.89371
ADAM12	3.58593	2.46935	2.69217
ADAM8	2.50438	3.18034	1.73974
ADAMTS10	0.272866	-0.425525	0.0565695
ADAMTS2	0.971862	1.27395	0.899468
ADAMTSL3	-2.24222	-0.391043	-1.05509
ADNP-AS1	-0.920418	-1.47755	1.30145
AF131215.5	0.578231	0.990665	1.86802
AFAP1L2	1.5411	1.51824	1.52525
AKR7A3	3.74781	2.89129	2.90393
AL022310.1	0.587416	2.8795	2.11341
AL022393.1	2.07048	1.92224	0.88037
AL022476.1	2.10516	1.40621	2.21129
AL031055.1	2.17161	3.4586	1.26398
AL031283.1	1.59233	1.8932	1.12626
AL031710.2	1.1796	0.482828	1.36186
AL031847.1	0.203239	2.07448	-0.0348859
AL031848.2	0.578849	0.990665	3.40327
AL035078.1	1.97782	0.821025	2.07404
AL049543.1	3.38285	0.990663	2.74989
AL049795.1	-0.794459	2.08046	-1.05513
AL049796.1	0.182518	2.06508	0.160373
AL096712.1	1.50532	0.486518	-1.0259
AL110118.2	1.18281	1.48113	1.75978
AL121845.1	0.579993	2.88136	1.62971
AL121900.2	2.59971	3.02998	3.51529
AL133243.2	1.61762	1.0593	1.16186
AL133245.1	1.58222	0.990663	0.38285
AL133355.1	3.75385	0.990665	3.2332
AL137798.1	1.1581	0.040911	-0.0738185
AL139274.2	2.11631	2.89067	1.50099
AL157394.1	0.771172	-0.401791	1.31971
AL158152.1	0.190884	0.494696	-1.00445
AL158827.2	0.196417	0.497648	1.0358
AL162171.3	2.15749	0.990662	1.81271
AL162311.1	3.76444	1.90851	1.58531
AL162586.1	0.591675	NA	0.393375
AL354714.2	2.03091	-0.548676	0.312427
AL354892.2	1.57321	1.87511	2.83101
AL355297.2	0.584409	NA	4.36293
AL356276.2	2.16352	2.48177	1.82616
AL357055.3	0.584825	3.70579	3.24511
AL357134.1	2.5966	0.990663	2.38801
AL357140.2	3.75099	4.21654	3.96394
AL358113.1	2.49112	2.47916	0.746481
AL358334.2	1.58225	NA	0.318001
AL358472.4	0.769502	0.488222	2.22932
AL358942.1	1.42972	1.98905	1.77262
AL359091.4	0.573424	2.00633	0.0564336
AL359510.2	2.1712	2.45505	2.1483
AL359697.1	2.57275	3.21705	3.20905
AL359706.1	3.38065	3.46473	2.79725
AL360091.1	1.51591	2.29708	0.230357
AL365223.1	1.58225	2.44689	0.317552
AL390037.1	0.579044	2.45704	1.95737
AL391058.1	2.91107	2.88463	3.37722
AL392089.1	1.33161	2.05909	1.8078
AL442663.3	0.776046	-0.4038	1.30491
AL445483.1	1.58216	2.46043	3.00524
AL449283.1	2.49448	2.29914	1.46691
AL450326.1	2.58771	3.6994	2.42088
AL512343.2	2.05944	-0.539993	0.637811
AL512652.1	2.8971	1.87918	3.11897
AL583856.1	2.51339	0.513809	-1.05264
AL589182.1	3.16003	3.46448	3.97256
AL589765.6	0.17998	1.80208	2.41747
AL589880.1	1.5016	2.07682	1.75557
AL590002.1	2.16266	0.779076	1.15843
AL591895.1	1.86908	1.2749	1.57642
AL592310.1	1.56978	2.45763	0.378954
AL592424.1	2.19516	1.49655	1.31984
AL592437.2	1.39252	0.960701	1.93211
AL596325.2	0.778349	1.50908	0.122346
AL627171.2	NA	2.48652	1.84583
AL672207.1	1.58222	NA	1.27023
AL807752.1	2.58457	1.02192	2.38138
AL845472.1	0.760603	1.08475	1.3765
ALDH3B1	0.586765	3.2213	1.37709
AMER2	-0.94754	-1.49769	0.641331
ANKLE1	3.40043	2.47162	2.48003
ANXA9	-0.800844	-0.388888	0.686502
AP000560.1	1.44833	1.74438	1.58558
AP000873.4	1.58213	4.05426	2.03616
AP001462.1	0.810423	1.10973	2.30167
AP005482.3	1.93565	2.02038	2.44168
APCDD1	1.90935	2.31902	2.63457
APOOP4	3.74405	2.48109	2.83727
AQP11	2.42174	2.56006	2.83645
AQP4	2.58217	2.88963	3.94933
ARHGEF37	0.161988	1.4634	2.02172
ARMC2	1.93253	1.74306	2.55464
ARPC3P2	0.190561	1.47878	1.19189
ASGR1	1.64348	0.758624	1.76297
ASIC3	1.16251	1.47435	1.48367
ATP8A2	0.477172	1.26346	1.69224
B4GALT1-AS1	0.579774	3.19287	2.16253
BAALC-AS1	0.58902	3.47002	0.381534
BDKRB2	0.188703	-0.402798	2.12166
BEST2	0.594546	NA	NA
BMPR1B-DT	1.58221	NA	1.72866
BMS1P2	2.58839	1.88985	3.36358
BMS1P8	2.09578	1.3961	1.63937
BRICD5	1.8083	1.99207	2.16545
BTBD19	0.692693	1.39876	2.22034
BVES-AS1	1.19161	2.49525	0.887695
BX323845.3	2.16983	2.87844	3.68178
BX546450.2	0.587374	0.990663	2.90673
C11orf80	1.58225	NA	NA
C1QTNF3	0.579491	3.69873	2.55665
C1RL	1.42845	1.73866	1.09193
C20orf204	0.588215	2.47455	0.377692
C2CD4A	0.83932	-1.91856	1.01459
C5orf66	2.16319	2.48544	2.07796
C6orf99	2.00911	0.835643	1.05048
C8orf49	0.768471	2.07671	1.89189
C9orf43	2.00882	1.09809	1.01694
CALHM5	2.90606	3.20679	3.91285
CATSPERB	2.17174	1.91239	1.69424
CBLN1	0.818134	0.539672	1.73838
CBLN3	0.705354	2.42442	1.87403
CCDC116	0.579158	3.21444	1.70595
CCDC39	1.75896	1.48676	2.53064
CCDC87	3.38802	2.88928	3.75379
CDK2AP1	2.12141	1.74083	2.29757
CDKN2B	0.82987	0.0255574	1.86775
CELP	3.38727	1.87652	1.11419
CERS6-AS1	1.94161	2.60419	2.29453
CFAP221	3.16717	2.87773	3.44258
CFAP54	1.50614	2.28981	2.29286
CFI	2.16275	1.89103	1.12002
CFP	1.98864	2.06374	1.26192
CHGB	1.18937	2.06942	0.428751
CHRNB4	0.776114	1.06393	2.15518
CLDN23	0.209258	1.50035	-0.126108
COL23A1	1.70575	2.22702	1.96839
COL6A3	2.03951	1.11713	1.80905
COL6A5	1.59459	0.990661	NA
COMMD3-BMI1	2.17671	1.81903	1.25014
CORO2B	0.691809	2.01314	1.17908
CPEB2	0.576594	-0.238342	1.85737
CPZ	1.49726	1.08805	1.55207
CRISPLD2	1.9251	2.59136	0.639035
CSPG4P12	2.81846	1.41717	2.34986
CSRP1	-2.25834	1.49572	-0.353695
CXorf58	1.58218	2.46258	0.368885
CYBB	0.588478	2.45469	0.324192
DDC	0.189961	1.06945	0.673773
DDX39B-AS1	-0.787496	0.493539	-1.99097
DENND1C	1.49938	1.81246	0.410847
DENND2A	0.771034	1.35428	1.10171
DES	2.90687	NA	3.70489
DHRS2	1.67595	1.97484	1.19772
DHX58	0.778911	-0.401153	1.81261
DLGAP3	3.16719	2.45809	1.86504
DNAH11	3.39713	3.87804	3.85886
DNAH6	0.244269	2.00025	1.76343
DNAJA1P3	1.17973	2.06912	0.821295
DND1	1.18562	1.48801	1.74125
DPPA4	2.0687	-0.515452	1.09169
DQX1	0.0719558	0.373801	2.05403
DUSP15	1.76465	-0.403085	1.73351
DUSP5	1.25022	1.37549	1.16802
DUSP6	0.695381	1.41014	2.15459
EDRF1-AS1	2.17054	1.88938	3.42184
EEF1A1P14	3.07761	2.0658	2.23305
EIF3IP1	2.16358	3.67516	2.92192
EIF5A2P1	1.18678	1.06189	1.56113
ENO4	3.39139	1.88891	3.23342
ENPP2	1.45086	2.24128	2.22274
ESAM	1.15621	1.27035	1.1014
ETV5	0.785903	1.06755	2.09923
ETV7	2.89621	0.990663	1.9709
FAM131C	2.05021	1.53592	1.85822
FAM181B	1.76062	1.79832	2.52353
FAM192BP	0.0710659	0.351242	2.01196
FAM223B	3.57896	2.8862	3.07373
FAM238C	3.16318	2.47147	1.63943
FAM66C	1.81196	1.52065	2.08713
FANK1	2.89756	3.46364	3.89708
FGF21	-0.782025	-1.34267	-1.98653
FGFBP1	2.13242	2.01722	2.73348
FHP1	1.17835	2.28974	1.38392
FILIP1	1.1747	1.0769	1.8991
FKBP4P2	3.3878	2.46985	3.1004
FMNL1	-0.346895	0.362773	0.949482
FO538757.1	2.90649	1.87695	3.70002
FOXL1	1.99768	-0.403198	1.38147
FOXP1-IT1	0.588943	NA	2.81763
FOXQ1	0.555593	-1.25537	1.77989
FP236383.1	1.78791	0.267132	2.91968
FP671120.1	1.17638	-0.793966	2.58199
FRRS1	0.681841	0.982901	0.424549
FTH1P15	1.49854	1.50075	2.28521
GAPDHP1	2.11128	2.01051	1.49429
GCNT2	2.63338	0.479592	2.51358
GCNT4	3.16466	3.20517	4.32271
GPR1	0.181652	1.07996	-2.00657
GRIN2C	1.50249	1.80375	2.21054
GSEC	3.23259	3.35243	3.77375
GSPT2	0.772774	0.479736	0.322471
H19	3.39182	1.87829	2.14022
HAUS6P3	2.43346	1.41278	0.619249
HHIPL2	0.578266	1.91463	0.951813
HIGD1AP1	0.23261	1.24087	2.01849
HIST1H2AH	4.82827	4.33688	4.72901
HIST1H2BG	0.76806	-0.396721	1.34449
HIST1H3J	2.47622	1.63479	2.16262
HLA-DMA	1.19483	0.319126	2.26438
HLA-DPB2	0.205416	-0.386132	-1.99178
HLA-L	2.75729	2.94136	2.45537
HMGB1P20	1.98858	0.478619	0.687847
HNRNPA1P50	2.25768	0.991024	0.582708
HNRNPH1P3	3.39164	1.89246	2.48502
HOXC12	1.75641	2.05334	3.03562
HS3ST1	2.18885	1.72214	1.4456
HSF4	2.19923	1.48083	1.49954
HSFX4	0.590217	1.87564	NA
HSPA1A	3.0758	1.47516	3.01369
HSPA6	0.579409	0.990662	2.4818
HVCN1	2.63611	2.27999	1.97054
HYMAI	1.99358	1.06533	0.607665
IFIT2	2.16375	0.990662	2.76425
IGSF9	2.58857	0.990662	2.14673
IL1R1	0.406159	0.483834	0.621623
IL32	0.186303	1.48872	0.933226
INHA	2.17166	3.45201	1.72842
IRF6	3.5784	0.990662	2.40088
ITIH4	1.98296	2.28568	1.59482
JMJD1C-AS1	2.13239	2.2524	3.47268
KBTBD11-OT1	0.692357	1.73809	2.17522
KCNB1	0.107804	1.41042	1.09112
KCND1	0.184806	2.29959	1.03502
KCNK9	1.10548	-1.44301	1.87252
KDELC1P1	3.38462	3.69644	3.4603
KIAA1257	0.70015	2.42461	2.21194
KLHDC7A	1.7726	1.7976	2.34217
KLHL31	1.40592	2.19343	1.49965
KLKP1	0.1088	-0.47661	1.64096
KYNU	1.51979	-0.396454	2.16219
LAT	1.7122	2.23192	2.08165
LILRB3	3.39617	3.20218	1.25852
LINC00376	1.1993	-0.403634	1.68092
LINC00574	1.57069	NA	2.8098
LINC00893	1.18506	2.06213	0.756348
LINC01137	1.43005	1.4055	-0.338774
LINC01176	2.16928	1.0609	2.9003
LINC01197	1.41132	1.70948	1.05066
LINC01297	2.20692	-0.38047	-0.428807
LINC01351	0.784338	-0.396111	2.0629
LINC01426	1.58216	2.88276	3.19728
LINC01456	0.694359	2.21774	0.90348
LINC01473	3.39178	2.90633	2.53606
LINC01503	-0.811971	-1.36272	2.29829
LINC01852	1.57308	NA	3.76257
LINC02086	2.17076	0.990663	3.28444
LINC02166	2.8401	2.25078	1.5706
LINC02249	0.481502	2.05435	0.771441
LINC02542	0.586351	2.89368	1.70821
LRRC56	1.18481	2.80555	2.40772
LSM3P5	3.16419	3.69583	4.03857
LY6K	1.19726	1.06603	1.80823
LYPD3	-0.818989	1.49258	1.43944
MAGEA6	0.181399	0.500222	0.587372
MAGEH1	2.5892	1.43074	2.04457
MAT1A	0.578364	NA	3.87153
MATN3	1.75773	0.482043	1.54822
MCFD2P1	0.585565	0.990662	2.06622
MIR101-1	3.40737	0.99066	NA
MIR101-2	2.77137	-0.407184	-4.22529
MIR486-1	3.18605	-0.690805	-3.19719
MIR486-2	2.24817	-0.635641	-4.45637
MIR6723	0.732197	0.782993	0.174466
MIRLET7BHG	2.55678	-0.549896	-0.273319
MIRLET7F2	2.80319	-1.34649	-1.99035
MMP1	NA	NA	NA
MORN5	NA	NA	1.52189
MRPS16P1	2.58218	4.20757	2.91112
MRPS21P2	-0.819351	2.07202	2.50155
MSR1	1.69866	1.00649	1.61267
MTCYBP36	0.791384	0.505528	1.3905
MTMR9LP	2.18478	1.09415	-0.189287
MTND1P14	0.193522	1.06637	1.59608
MTND3P12	0.589442	1.8919	NA
MTND4P24	0.424932	0.733601	2.53802
MTND5P10	0.770361	1.49941	1.2406
MTND5P12	2.57671	3.69374	2.77299
MTRNR2L5	0.577943	NA	1.7355
MUC20	1.58224	0.990664	0.917413
MVP	2.49921	0.487908	1.97722
MYCN	NA	NA	2.33298
MYO15A	0.585794	2.46939	1.49
MYO18A	1.46679	1.32449	1.44566
MYOF	NA	0.990663	3.15476
MYZAP	2.90189	3.69679	3.17761
NANOS1	1.90457	-0.508995	3.27519
NAP1L4P1	1.5822	1.91116	1.22191
NAPSA	2.51501	-0.406998	2.0053
NCLP1	1.40237	0.390459	-0.16408
NDUFB4P2	2.16291	0.990663	2.30783
NECAB2	2.17865	2.4759	2.17196
NECTIN4	2.33992	2.05763	2.84841
NEUROD1	1.98633	1.80725	1.71041
NEUROD2	1.7058	1.00513	1.63864
NME2	2.13867	1.34099	1.65197
NR2E3	1.76316	2.05908	2.30972
NRK	1.77578	-0.400744	1.30317
NRROS	0.697519	1.98591	1.23658
NTN4	2.87549	2.64553	2.90635
NUTM2D	2.17007	2.47934	2.71562
OAZ3	2.58717	2.13437	2.63489
ODF3L1	1.59307	NA	2.39645
OPRD1	1.94872	2.90752	2.98037
OR2AG2	1.91973	0.999898	0.89985
OR7E162P	1.93499	1.43306	2.49524
OR7E29P	0.774722	-1.35021	0.187976
OR7E84P	-0.892179	2.58172	0.327731
P2RX2	0.78141	-1.34212	0.166135
PARD3-AS1	0.191962	0.514784	1.03704
PCDHA10	-0.137371	0.157804	0.929698
PCGF7P	1.97304	2.64463	2.54339
PDE1B	2.57608	2.46938	3.51279
PDGFRA	0.181866	1.06446	2.46767
PDPK2P	1.56536	3.25186	1.47065
PIFO	-0.472797	-1.16351	0.180621
PLEKHA3P1	2.16965	1.49354	2.52537
PLGLB1	1.98368	2.47723	2.94992
PLXDC1	-0.274398	0.775947	0.30616
PLXNC1	2.33763	2.38036	2.17025
PRR16	1.25773	1.55462	1.03595
PRR34	NA	3.20184	0.375788
PTP4A2P2	3.16357	3.68614	2.77361
PTPRD-AS1	NA	2.48861	2.09396
PVALB	0.228841	0.860564	2.12256
RALGAPA1P1	2.90628	4.06535	3.01735
RASL10A	2.16445	3.88334	3.44265
RBM22P5	1.18627	-0.399071	0.108971
RF00002	1.19258	0.506924	0.884296
RF00026	2.76137	3.06324	2.51332
RF00100	3.98179	0.868179	0.778144
RF00432	0.0773422	0.385019	0.101063
RGPD4-AS1	NA	0.990662	0.31901
RGS9BP	-0.819417	1.81308	1.75314
RHEBP1	2.58221	3.46318	1.81623
RIBC2	2.1263	2.42993	1.38547
RIMBP3C	2.33611	2.47313	2.73385
RN7SK	2.85008	-1.13903	-0.0753482
RN7SKP203	4.53225	1.07789	2.23199
RN7SKP255	3.19685	-0.625042	-0.612438
RN7SKP71	3.60349	0.345881	1.31499
RN7SKP80	2.0923	-1.03045	-0.426941
RNA5S17	2.5891	0.990663	0.372512
RNU1-106P	0.579885	2.89412	2.78128
RNU2-63P	3.16716	2.87547	2.71659
RNU2-6P	0.578005	0.990665	1.7348
RNU6-15P	0.17109	2.64789	2.51453
RNU6-48P	1.59584	1.8716	0.32162
RNU6-4P	1.54577	2.26192	1.67837
RNU7-41P	2.16378	3.21913	2.57327
RORA-AS1	-0.911357	0.387237	0.938839
RPL11P5	1.98861	1.08028	1.70415
RPL13P2	1.86216	1.64033	2.29506
RPL17P44	2.07206	0.376184	-1.18506
RPL23AP45	3.15878	0.990663	4.05945
RPL23AP60	2.19024	1.49694	0.766124
RPL23AP75	2.82877	1.01844	2.36302
RPL30P7	2.58752	3.47288	2.31935
RPL3P3	1.99218	1.06266	1.09854
RPL7P10	3.17178	1.87741	3.22341
RPS10P2	2.19671	-0.394871	0.204846
RPS15AP10	1.58009	2.01556	0.38529
RS1	1.59276	2.45967	2.6364
RSPH4A	2.10997	1.41705	1.78297
RWDD4P1	0.177449	1.49184	2.70936
SCARNA1	2.3488	1.80114	2.15617
SDR42E2	1.99431	-0.398394	0.775944
SEC11B	1.50681	1.49069	2.16335
SEMA4A	2.45134	2.43345	1.67215
SEMA7A	2.03004	2.51925	2.12471
SERPINC1	3.3921	0.990663	0.397513
SFN	1.49825	0.478647	2.47021
SFPQP1	3.37147	NA	NA
SHANK2	2.90681	4.1947	3.09367
SHH	2.15595	NA	3.02669
SIK1	1.76273	2.24346	1.49047
SIK1B	1.94946	2.25123	1.22727
SINHCAFP2	3.38724	0.990663	2.01385
SKIDA1	0.742196	0.550424	1.56935
SLC19A3	2.58594	1.01676	2.52096
SLC24A2	1.3308	-0.527212	1.42285
SLC25A18	2.07152	1.36306	0.881986
SLC35D3	2.72483	2.60706	2.22498
SLC8A2	0.183846	-0.398063	1.61855
SLCO3A1	0.584192	3.21683	3.00775
SLFNL1-AS1	1.42713	2.22192	-0.189852
SNORA36B	0.586779	3.46573	1.1248
SNORD3C	2.59126	2.75058	2.86215
SNORD65	1.6876	1.98487	1.14689
SNRPCP2	2.88853	0.480126	1.60297
SNX5P1	2.90626	3.68154	3.11064
SOCS3	1.76036	1.48176	1.81199
SOWAHD	3.39975	2.47156	2.62452
SPOCK1	1.74394	1.79213	1.16258
SPP1	NA	0.990662	2.13621
ST13P15	3.39494	1.89072	3.52339
ST8SIA5	0.0917753	1.71443	-1.12806
STAG3L5P	2.90651	3.2172	3.123
STAT4	1.8578	1.79269	1.9764
STRADA	3.74731	3.89356	1.98691
STYK1	2.58218	1.87777	3.41325
SULT1C4	0.681057	-0.492273	1.56195
SULT2B1	1.11684	-0.567834	0.997697
SUSD4	3.16245	3.16626	3.29843
SYTL2	2.3495	1.06741	1.89186
TBC1D3P1-DHX40P1	2.50513	1.05947	2.28135
TCHH	2.17062	0.990665	2.94983
TCP1P3	2.89879	2.47139	3.12205
TECTA	0.175576	0.489179	1.48309
TEKT3	0.579263	0.990662	3.30072
TERF1P1	1.6944	1.40952	-0.196975
TEX45	1.47984	2.26269	0.712967
TFCP2L1	1.63708	1.39739	2.03739
TKTL1	2.35071	0.482435	1.42632
TLL2	1.80676	0.634929	1.95601
TM6SF1	1.41653	0.403916	-0.447049
TMED6	0.118249	0.419997	1.87373
TMEM191B	1.18433	1.35895	2.36523
TMEM35A	2.35188	-0.401391	0.685587
TMEM86B	1.75994	1.80248	2.37959
TNFRSF25	1.32899	-0.539347	2.33985
TNNC1	2.00226	1.07829	1.19403
TNRC6C-AS1	-0.898853	2.21202	1.5334
TPH1	1.99244	-0.404553	1.68915
TRPV2	1.98784	2.06203	1.09136
TSPAN19	1.22673	-0.470115	2.33101
TSPOAP1-AS1	1.57415	2.47341	3.47789
U62317.4	3.57813	NA	2.32583
UBE2D3P2	2.03308	0.353642	-1.21093
UBE2L4	1.70716	2.43276	1.79392
UNC5B-AS1	0.175584	1.07188	2.71581
VGF	1.74183	1.0918	2.15351
VILL	1.16362	2.0518	1.88493
VSIG2	0.0838337	-0.517232	-0.37938
WBP2NL	2.17028	2.46297	3.61126
WNT2B	1.64595	1.40515	1.49828
Z82243.1	0.758873	2.05999	0.637594
Z99129.3	0.66247	2.55635	0.531309
ZC2HC1C	1.58213	3.20873	3.72017
ZMYND10	1.19211	2.28847	-1.05996
ZNF154	1.18922	1.50297	-1.99355
ZNF18	3.16318	2.46523	2.5689
ZNF460	0.96801	1.62955	0.34026
ZNF586	2.72489	3.02805	2.44133
ZNF669	2.49429	1.06391	2.11247
ZNF816	1.75207	1.63393	1.51494
ZNF852	1.17875	1.80769	1.61652
A1BG	-4.45615	-2.60498	-1.30515
ABCB4	-0.862178	-1.58009	-1.96463
AC000068.3	0.174842	-3.70319	-1.71644
AC002350.1	-2.75699	-2.34537	-1.37881
AC002407.1	0.158597	-3.73465	-4.3785
AC002558.1	-0.201448	-0.900811	-1.95321
AC004816.2	-1.00642	-1.70038	-2.44457
AC004908.2	-1.91491	-0.428548	-1.33658
AC005019.1	-1.8696	-0.56558	-2.25864
AC005041.3	-4.47445	-1.74157	-2.20827
AC005197.1	-0.736161	-2.01564	-1.17999
AC005476.2	-1.76279	-2.35429	-0.771292
AC005480.2	-0.539576	0.902086	-1.28023
AC005520.5	-0.835557	-0.542242	-3.16675
AC005921.3	-2.86895	-2.45834	-0.17286
AC005962.1	-0.418662	-0.616095	-1.80182
AC006077.2	-2.31415	-1.30258	-1.06964
AC006329.1	-0.717171	-0.416892	-0.723584
AC006386.2	-4.33713	-3.44776	-3.16178
AC006449.2	-1.05206	-3.6054	-2.6215
AC007032.1	-1.0648	-1.08342	-1.53194
AC007191.1	-2.45802	-1.14932	-1.42205
AC007249.2	-1.60431	-2.29753	-1.07929
AC007375.1	-3.30314	-0.665242	-0.439267
AC007613.1	-0.989917	-0.989477	-0.501315
AC007663.3	-1.14962	-0.856022	-2.01064
AC007952.6	-2.00059	-2.60446	-2.16473
AC008026.3	-1.16907	-0.866197	-1.74087
AC008040.5	-1.51484	-3.11093	-1.00035
AC008155.1	0.215356	-2.18879	0.070774
AC008537.2	-1.39171	-2.5718	-2.36424
AC008649.1	-3.19812	-1.88526	-1.12692
AC008799.1	-0.115041	0.475792	-1.00233
AC009054.2	-0.563589	-2.75646	-1.71645
AC009121.2	-2.97553	-0.672577	-0.43869
AC009336.2	0.799606	0.848948	-0.137672
AC009878.1	-2.77579	-1.46746	-0.100536
AC009948.4	0.16093	0.0158271	0.009763
AC010245.2	-0.601363	-0.151743	-0.57188
AC010336.1	-1.14483	-2.83672	-1.23232
AC010469.1	-0.540675	-2.45638	-0.949282
AC010491.1	-0.749049	0.14379	-2.24322
AC010619.2	-2.1522	0.0593876	-0.584419
AC010653.3	-0.585388	-2.0769	-1.39421
AC010654.1	-3.25336	-3.80378	-1.0951
AC010680.2	0.354343	-2.93497	-0.427896
AC010719.1	-2.31676	-1.20031	-1.47767
AC010834.3	-0.0521106	-2.4527	-0.0996494
AC011330.2	-2.11454	-0.404241	-1.28261
AC011462.4	-0.515372	-0.670611	-1.87307
AC011468.1	-1.19207	-0.470017	-0.432491
AC013394.1	-1.23991	-2.82612	-0.918738
AC015909.2	-0.651777	-0.328453	-1.03167
AC016737.1	-1.94266	-2.54061	-0.419996
AC016773.1	-1.5884	-1.28112	-0.70489
AC016949.1	-0.556852	-1.27046	-1.31459
AC018809.1	-1.68431	-1.19044	-1.48873
AC019205.1	-3.97486	-0.867604	-0.392126
AC020658.1	-1.06405	-0.186565	-1.65881
AC020663.3	-2.06752	-0.764957	-2.60027
AC020899.1	-1.15655	-1.27107	-2.27238
AC022382.1	-0.241547	-0.748245	-2.50793
AC022968.1	-0.246026	-0.462443	-0.909312
AC023043.4	-1.09154	-1.65897	-2.06399
AC023157.3	-1.33605	-0.263224	-2.28392
AC023908.3	-1.24048	-0.621784	-2.6285
AC025166.1	-1.12052	-0.401705	-1.32869
AC026250.1	-2.94422	-1.6479	-0.513161
AC027097.2	-0.697922	-3.26643	-1.74914
AC027575.2	-1.63987	-0.919498	-2.73732
AC034198.2	-0.643838	-0.811544	-0.336192
AC062017.1	-1.64344	-1.15343	-1.00931
AC063948.1	-2.65841	-0.471647	-1.75153
AC064807.1	-0.201099	-0.356679	-0.461315
AC064836.3	0.389445	0.102882	0.657962
AC064847.1	-4.32747	-2.47629	-2.05176
AC068313.1	0.391085	-2.36285	-0.648146
AC068620.2	-1.33062	-1.75142	-0.617521
AC068790.5	-4.59326	-1.85204	-0.448145
AC072061.1	-2.1659	-1.13706	-2.18294
AC074276.1	-0.868986	-3.42231	-0.602182
AC078777.1	-3.25592	-2.8444	-2.62536
AC079089.1	-1.12834	-0.337807	-1.0365
AC079089.2	-2.87405	-0.977244	-1.16998
AC079305.2	-0.369394	-0.0586163	-1.80487
AC080013.1	-4.30782	-0.967794	-0.494195
AC084125.2	-1.48571	-0.179486	-2.01051
AC084368.1	-0.325793	-0.0153526	-0.0168352
AC084824.4	-1.1848	-1.16694	-0.532958
AC084880.1	0.363909	-0.0588245	-1.30628
AC087392.1	-2.11503	-1.07573	-0.777551
AC087392.5	-1.22946	-1.32679	-0.435477
AC087477.2	-2.10814	-0.349501	-0.823019
AC087623.3	-0.823255	-1.83864	-2.08005
AC090502.4	0.268469	0.0439911	0.263878
AC090772.3	-0.115639	-0.0621073	-1.24107
AC090948.1	-1.28731	-3.42954	-2.20631
AC091133.4	-1.57627	-1.27178	-0.752837
AC091152.4	-3.37539	-2.97093	-1.90585
AC092047.1	-1.04946	-0.493638	-1.81118
AC092171.3	-0.821219	-0.536117	-1.28067
AC092354.1	-2.86646	-1.56877	-0.04728
AC092376.2	-1.94302	-1.21585	-0.940287
AC092638.2	-1.66893	-0.783045	-0.143344
AC092641.1	-0.969105	-2.56064	-1.55635
AC093155.3	-1.13178	-2.15183	-1.87473
AC093627.5	0.126633	-0.472153	-2.24816
AC095055.1	0.299333	-0.247929	-1.12269
AC096564.1	-0.740935	-0.198505	-0.988791
AC096733.2	-0.893436	-3.65896	-2.21036
AC097461.1	-1.05357	-1.48457	-4.57983
AC097468.3	-0.243841	-0.117303	-0.308442
AC097641.2	0.0147424	-1.84305	0.485992
AC098484.2	-3.14749	-1.84336	-1.82625
AC099489.1	-1.13212	-1.40695	-1.44231
AC099791.2	-0.646887	-0.987012	-0.72239
AC103702.1	-0.807929	-1.50329	-2.90799
AC103702.2	-0.564443	-0.429164	0.0517491
AC104785.1	-1.8616	0.016891	-0.715935
AC104971.1	-1.14009	-1.15727	-2.41226
AC105250.1	-1.52209	-1.21372	-1.44506
AC105429.1	-0.723405	0.170118	-0.502687
AC105760.2	-0.575227	-0.859418	-1.16863
AC106038.1	-0.550063	-0.978531	-2.48527
AC106052.1	-0.772552	-0.474112	-1.63099
AC106786.1	-1.75733	-1.45506	-3.93935
AC106872.3	-0.424883	-2.1321	-1.83301
AC106881.1	-1.117	-1.0861	-1.85828
AC107308.1	-1.27749	-2.45698	-0.495868
AC107398.3	-0.758265	-0.15561	-0.8271
AC107890.1	-0.866062	-3.04637	-2.08042
AC108471.2	-0.0600863	-2.08808	-0.964928
AC109329.1	-1.72926	-0.677844	-0.501807
AC109587.1	0.224582	-3.32876	-0.340284
AC110491.1	-1.12993	-0.819215	-0.634948
AC110768.2	-0.190715	0.10585	-1.18808
AC112184.1	-3.57809	-1.28598	-1.38704
AC112220.4	-0.533981	-2.35031	-0.500708
AC112498.1	-1.18442	0.110251	-2.21685
AC113139.1	-0.476678	-1.1682	-1.4878
AC113143.1	-1.87441	-0.982762	-2.25418
AC116348.3	0.0650956	0.368522	0.0261645
AC116914.2	-4.32789	-3.43851	-1.91988
AC117440.1	-0.350662	-0.0293435	-1.57499
AC119403.1	-0.481484	-0.45582	-0.53308
AC120036.4	-0.823512	-0.675982	-1.00873
AC122688.3	-0.0584033	-0.166873	-2.41958
AC124242.1	-2.06294	-1.34886	-0.48256
AC125494.2	-2.86646	-0.980176	-1.28967
AC128688.2	-4.20854	-0.445847	-3.96301
AC128689.1	-0.749781	-1.86992	-1.65561
AC129492.3	-0.898352	-0.9135	-1.14209
AC130343.2	-0.411756	-0.279624	-1.78726
AC130472.1	-1.06817	-1.56917	-1.25487
AC131235.4	-2.01597	-2.30676	-1.76128
AC133550.2	-5.01107	-4.12169	-3.76851
AC133552.2	-1.2315	-0.344647	-0.0095274
AC134043.2	-2.72411	-2.31152	-1.83679
AC135048.3	-2.367	-0.801008	-0.415603
AC135279.2	-1.75253	-0.865681	-1.48841
AC135803.1	-0.189329	-2.36177	-0.293326
AC136475.7	-3.12566	-2.7138	-1.17842
AC138028.2	-4.3284	-3.43901	-0.725287
AC141002.1	-1.28649	-2.47752	-1.7823
AC141586.2	-0.175351	-2.36017	-0.33395
AC211476.2	-3.15099	0.321008	-0.602777
AC211476.4	-1.29745	-0.684972	-2.25439
AC234582.1	-0.544853	-1.56431	-2.32887
AC241377.3	-0.798321	-1.34099	-1.23685
AC242842.2	-1.14493	-0.375807	-0.957068
AC243732.1	-1.86826	-2.15658	-3.02836
AC244033.2	-1.56748	-0.534823	-1.23581
AC245014.1	-1.21809	-0.335477	-0.458616
AC245140.2	-0.993042	-1.42344	-3.56111
AC246785.3	-0.473942	-1.02307	-0.58018
ACE	-0.228962	-3.28129	-2.97104
ACE2	-0.163113	-3.29574	-2.92909
ACVR2B-AS1	-0.652529	-2.56854	-3.19548
ADAMTS6	-1.37638	-1.81477	-1.29969
ADAMTS7	-0.879589	-0.867992	-0.110457
AF127577.4	-1.41823	-0.11721	-0.943414
AF131215.7	-2.86723	-0.981074	-0.692222
AGAP7P	-2.87675	-1.57908	-1.29152
AGPAT4-IT1	-2.43812	-2.13401	-0.98725
AKR1B1P2	0.312312	-1.07282	-1.53162
AL008723.1	-0.277246	-0.962251	-1.09146
AL021878.2	-0.376086	-1.0787	-2.63423
AL022068.1	-2.87394	-2.46297	-0.295492
AL022322.2	-0.337194	-1.27017	-3.37346
AL022323.4	-1.06751	-0.343134	-3.85343
AL022328.2	-2.88557	-2.47356	-2.34468
AL023806.1	-1.88694	-1.56573	-1.13796
AL024498.1	0.0728245	-0.504741	-0.999915
AL024508.2	-0.391023	-2.08491	-1.34728
AL031595.3	-0.874438	-0.556306	-0.554029
AL034397.3	-4.41934	-3.12644	-5.62073
AL035458.2	0.196219	-0.766006	-0.226816
AL078621.1	-1.18966	-2.36316	-0.449538
AL096701.1	-0.85748	0.0293869	-0.211618
AL109797.1	-1.28422	-0.991511	-0.354626
AL132780.5	-1.48917	0.0481478	-0.246804
AL133551.1	-4.39804	-0.645865	-0.0329487
AL136162.1	-0.539362	-0.0434102	-0.286827
AL136531.1	-3.07014	-0.757185	-0.551654
AL139082.2	-1.08485	-1.38025	-1.18573
AL139089.1	-0.58565	-0.277605	-0.781651
AL139099.1	-0.489861	-1.1787	-0.0215807
AL139289.2	-2.23558	0.401652	-0.410948
AL139317.2	0.107355	0.124433	-0.0921479
AL139384.1	-1.74172	-3.30597	-0.544979
AL139423.1	-1.03474	-2.63928	-1.46365
AL158211.4	-2.31877	-2.90341	-0.350946
AL158212.2	-2.25665	-1.92412	-1.66475
AL161454.1	-0.772784	-0.871144	-2.21296
AL161670.2	-0.770926	-2.36245	-1.46156
AL161908.1	-3.58109	-1.27254	-1.25604
AL162258.2	-1.49388	-0.916958	-0.983288
AL353151.1	-0.830209	-0.838962	-1.43019
AL354696.2	0.0574448	0.448652	-0.23537
AL354920.1	0.247972	-0.822752	-1.0729
AL356273.3	-0.913316	-1.34368	-3.48158
AL357632.1	-1.17079	-0.138989	-0.917558
AL359715.1	-2.25833	-1.37472	-1.66563
AL365181.3	-1.55364	-2.23463	-1.38084
AL365226.1	-0.343444	-0.53315	-0.26595
AL390774.1	-0.0804955	0.0284345	-2.00289
AL391121.1	-2.10492	-1.54196	-1.88546
AL445228.2	-2.76343	-0.877066	-0.988135
AL445231.1	-0.191558	-0.889416	-2.0686
AL450309.1	-0.746674	-3.50379	-2.26768
AL451007.1	-1.0519	-1.10901	-0.973184
AL451074.2	-1.29021	-1.58963	-1.07432
AL451164.3	0.685497	-0.896955	-1.3241
AL513550.1	-1.49688	-3.63876	-0.0161721
AL589765.5	-1.75692	-0.86515	-1.97619
AL589826.2	-0.365544	-0.393299	-2.00673
AL591866.1	-1.08716	-1.34313	-2.12411
AL606469.1	-4.44491	-3.55553	-2.46196
AL645568.1	-0.438107	-2.35414	-0.421664
AL645568.2	-1.58244	-1.28295	-1.80264
AL662844.4	-2.14926	-0.261886	-1.45385
AL669831.1	-1.20499	-0.898061	-0.637159
AL807761.2	-0.871822	-3.42516	-0.615077
ALDH1L1	0.202661	-3.08476	0.341317
ALDH8A1	-2.75818	-1.44697	-2.96742
ALG3P1	-2.31733	-0.20472	-0.831667
ALOX5	-0.0572152	-2.45797	-0.467396
ALS2CR12	-1.71832	-3.28736	-3.93121
AMIGO2	-0.885865	-0.808425	-1.32153
AMT	-1.05481	-1.74736	-1.1348
ANKDD1A	-0.102681	-0.535871	0.025157
ANKRD20A5P	0.0466461	-3.31607	-0.260116
ANXA2P2	-0.363067	0.0788843	-0.163523
AP000223.1	-1.12616	-0.577201	-1.55975
AP000238.1	-2.7327	-1.42628	-3.93789
AP000240.1	-0.421407	-1.10794	-0.342954
AP001160.4	-1.86273	-0.149495	-0.9214
AP002986.1	-1.0684	-0.761008	-1.10767
AP003068.4	-1.39613	-0.28246	0.100441
AP003352.1	0.881209	-1.13937	0.579548
AP003469.4	-0.98313	-0.148069	-1.84758
AP003733.4	-2.99166	-1.68492	-2.32285
APCDD1L	-1.74832	-1.43936	-1.40848
ARAP3	-0.834139	-0.754823	0.0720756
AREG	-2.22982	-2.8213	-1.27247
ARHGAP8	-0.395138	-0.506303	-0.446562
ARHGEF19	-2.27372	0.15342	-0.507335
ARRDC3-AS1	-2.65501	-1.75034	-1.39879
ART4	-0.958214	-0.664313	-0.384863
ASNSP4	-1.46001	-1.15714	-1.17774
ASS1P9	0.311041	-2.74121	-1.93306
ATG16L2	-0.256489	-0.351674	-0.473254
ATP6V1G2	-0.352908	-0.190307	-1.20435
AXL	-1.73179	-1.17037	-0.323375
BCDIN3D-AS1	-1.29242	-1.58127	-1.34351
BDNF	-2.75005	-2.33671	-2.93017
BDNF-AS	-2.14062	-0.430426	-0.974375
BISPR	-4.70122	-2.85004	-2.26876
BMP2	-1.30219	-0.077585	-0.174543
BMS1P15	-0.856546	0.771754	-0.99824
BMS1P22	0.55263	-1.25964	-2.00306
BMS1P4	-3.53638	-1.22097	-1.67793
BNC2-AS1	-2.87524	-0.568649	-1.29099
BOK	-0.742939	-2.31023	-1.93226
BOLA3P2	-2.64622	-2.32491	-3.88974
BTG3-AS1	-1.52828	-0.226169	-0.460276
BX649601.1	-1.0042	-0.954196	-0.95136
C10orf82	-0.960787	-0.431315	-0.826014
C10orf95	-2.58115	-1.27711	-3.83021
C11orf65	-0.390197	0.239847	-0.377054
C15orf48	-0.035927	0.266707	-0.00696906
C22orf24	-2.05739	-1.17728	-0.991548
C2CD4C	-4.21209	0.347629	-0.765731
C3	-1.86137	-2.46109	-1.2897
C5orf49	-2.86124	-0.983491	0.212949
C6orf141	-0.760067	-1.46237	-0.785405
C9orf139	-0.612014	-0.168258	-1.29779
CA14	0.0266155	-2.48158	-0.341248
CALHM2	-0.798733	-0.133171	0.650615
CALM1P1	-1.07915	-0.182956	-0.0895542
CASC9	0.726741	-3.63199	-0.449582
CCBE1	0.0867272	0.486686	-0.340755
CCDC110	-0.432087	-0.482735	-1.096
CCDC78	-0.564848	-0.527998	-2.6776
CCSER1	0.381835	-2.37582	-0.280445
CD44	-0.341092	0.371677	-0.0909187
CD68	-0.717514	-1.01776	-1.25368
CD8A	-1.11576	-2.21741	-0.506079
CDH15	-4.2498	-1.35586	-2.60048
CDH22	-4.1784	-3.28902	-2.41061
CDKN2A-DT	-1.1978	0.337159	-0.239417
CDYL2	-2.51922	-4.65474	-0.982868
CEBPA-DT	-0.942129	-2.75395	-1.3208
CEBPB-AS1	-0.189501	-1.46805	-2.29898
CFAP100	-4.32561	-1.57018	-2.49884
CFH	-1.63915	-2.23065	-0.181858
CHAC1	-1.29264	-1.24007	-1.8653
CHCHD2P2	-0.177193	-0.876073	-0.519682
CHST1	0.222243	-0.157101	0.07136
CHST9	-0.901926	-2.08779	0.0229508
CKS1BP2	-0.209123	-3.60415	-0.881786
CLDN10	-1.28535	-1.57642	-0.567633
CLMP	0.314839	0.319662	-0.705541
CLUL1	-0.221176	0.46419	0.202212
CNTNAP1	-1.31508	-2.00946	-0.499157
CNTNAP3	-0.691517	-0.381788	-0.543782
COL9A2	-0.396329	-0.593935	-1.6252
COPS8P2	-0.306045	-1.87265	-2.62278
CPT1B	-1.00129	-1.28594	-0.561284
CRB3	-1.18728	-2.36063	-0.577868
CRYM-AS1	-0.645268	-0.938187	-0.786147
CU638689.5	-1.86168	-2.14763	-0.973558
CXXC4	-0.73079	-0.465251	-0.680231
CYP1A1	-1.38688	-0.763384	-0.758265
CYS1	-1.45211	-1.56286	-0.827953
DAND5	-3.30735	-1.42628	-0.936204
DCN	-4.19055	-2.33937	-1.30036
DDIT3	-2.48186	-2.104	-2.25661
DDX58	-0.798753	-0.486419	0.354001
DERL3	-2.13029	-2.1538	-1.9925
DHDH	-2.11336	-1.48504	-1.23348
DINOL	-1.60984	-4.00971	-0.595811
DIP2A-IT1	-2.53599	-0.898001	-2.70263
DIRAS3	-1.06202	-0.768295	-2.24697
DLX3	-0.879585	-0.989997	-0.736992
DNAH1	-0.656894	-1.80493	-0.975616
DNAH10OS	-1.54686	-1.64488	-4.74406
DNAJB7	-2.75157	-2.33949	-3.0052
DNAJC15	-0.734454	-0.534289	-0.212676
DOCK9-DT	-2.06417	-1.0129	-1.73586
DZANK1	-0.768276	-0.96995	-0.713087
EDA2R	-1.39587	-0.985946	-0.765515
EDNRB	-0.271753	-1.13165	0.224747
EGFL8	-1.16169	-0.84813	-1.73955
EGR2	-2.30977	-2.89318	-1.52381
EIF4HP1	-0.143359	-2.74103	0.470004
ENO1-AS1	-0.51834	-0.800973	-0.694915
ENO3	0.36045	-0.336826	-0.235624
EPHA5	0.403851	0.847238	0.353758
EPHA5-AS1	-0.193088	-0.89268	-0.780211
ERBB4	-0.606884	-0.675779	-2.16456
EXOC1L	0.224341	-2.37811	0.257015
EYS	-1.49354	-2.51863	-2.6783
FAAH2	-4.1899	-2.33872	-1.59975
FAM110C	-3.03385	-2.62086	-2.68957
FAM110D	-1.93874	-0.418387	-1.72824
FAM131B	-1.86601	-1.00008	-1.31214
FAM136BP	-2.76835	-0.138949	-0.769907
FAM167A	-0.634361	-0.335311	-1.07127
FAM169B	-0.644188	-1.14714	-1.48415
FAM185BP	-1.00565	0.299472	-2.32176
FAM196A	-0.642872	-1.76411	-1.41648
FAM201A	-2.04609	-0.740993	0.0173068
FAM214B	-1.3942	-2.98566	0.852292
FAM86FP	-2.75652	-0.459572	-2.12219
FAR2P2	-1.29108	-2.46397	-2.25627
FBXL13	-3.04029	-2.63644	-2.50252
FBXO2	-1.3425	-0.256849	-0.427124
FDPSP1	-0.774048	-2.3602	-0.387343
FES	-1.12713	-1.15294	-1.87894
FGF12	-0.605753	-0.682337	-0.305047
FGF13	-0.256979	-2.65771	-0.991603
FGF7	-1.7614	-0.857607	-3.00617
FHAD1	-0.210106	0.835392	0.52168
FLNB-AS1	-1.65256	-2.15818	-1.70817
FO393409.1	-4.45608	-1.70038	-1.90348
FOCAD-AS1	-4.74863	-0.196679	-1.56819
FOXD4L6	-2.0872	-1.78249	-0.54722
FOXP3	-2.87944	-1.57943	-1.75129
FRG1KP	-1.8018	-2.97526	-2.3289
FSIP2	-0.443366	-2.3635	-1.12297
FST	-0.648766	-2.51394	-0.00651634
FTH1P3	-0.845957	-1.4253	-0.715586
FTLP2	-0.892512	-0.588093	-0.938476
FUT1	-0.873729	-0.586321	-1.95598
GDF6	-1.64568	-0.167798	-0.195514
GDNF-AS1	-2.76254	-0.470569	-1.37203
GMFG	-2.93781	-1.05044	-0.698111
GOLGA6L5P	-1.34403	-1.84694	-0.592906
GPSM3	-0.430403	-0.463123	-2.41539
GRID2	-1.5842	-3.16998	-1.73089
H2BFS	-0.80797	-0.495619	-0.611499
HAS2	-1.06457	-2.07582	-1.80718
HBZ	-2.24208	-1.35474	-1.92385
HCG17	-2.75469	-0.871511	-2.21254
HCN4	-0.57529	-1.48745	-2.32458
HERC2P3	-1.02052	-2.70369	-2.61995
HERPUD1	-1.90051	-1.78	-2.06291
HIST1H2BH	-0.72196	-1.2361	-0.460685
HIST3H2BB	-0.618995	-1.41137	-1.28856
HMGN4	-1.17927	-0.0285406	-0.962509
HNRNPRP1	-0.388606	-1.49377	-0.852707
HSFX3	-0.190556	-0.544609	-0.991249
HSP90B3P	-1.74265	-1.33283	-1.13012
HSPB9	0.167475	-0.846578	-1.0642
IDI2-AS1	-4.19591	-2.34473	-2.96374
IFITM10	-0.229965	-2.51784	-0.532532
IGSF11	-1.31513	-1.42586	-1.0732
IKZF3	0.0761785	0.500089	0.228927
IL17RC	-0.560795	-0.847752	-0.823688
IL18BP	-0.77914	0.108496	-2.13376
INHBE	-1.16795	-0.227617	-1.10945
IRX6	-0.792313	-0.485673	-1.14736
ITGA4	-0.927088	-0.109789	-0.447367
ITIH5	-1.17341	-2.35947	0.210359
IZUMO4	-1.8748	-3.05484	-1.96774
JAM2	-1.13989	-0.891975	-1.27641
KC877982.1	-2.19276	-1.0495	-0.96418
KCNIP2	-2.07719	-0.203589	-1.07601
KCNIP4	-1.2698	0.438749	-2.22147
KCNQ1	-0.640066	-0.331021	-0.495545
KCNS3	-0.316648	-0.187199	-0.980602
KHSRPP1	-1.75409	-3.29337	-3.00151
KIAA0825	-0.5381	-1.81916	-0.372849
KIAA1614	-1.14487	-3.70345	-0.765246
KIAA2012	-2.15025	-1.25911	-1.07781
KIF25	-2.87467	-0.758733	-2.1135
KIF9-AS1	-2.38998	-0.495665	0.0835214
KLHL30	0.23752	-1.46242	-0.918957
KLHL32	-1.26211	-1.5479	-0.971411
KLHL41	-0.858777	-0.97993	-0.388306
KRT17	-1.06545	-1.97912	-0.606935
KRT18P17	-1.06171	-0.530757	-2.12925
KRT18P18	-2.71175	-3.27246	-1.56749
KRT18P8	-1.45395	-3.05088	-1.95781
L3MBTL4	-0.756095	-2.68276	-0.35986
LAMTOR5P1	0.0706975	-0.819734	0.135409
LDHD	-2.52054	-3.11201	-1.72703
LEF1-AS1	-2.30375	-0.697881	-0.0477233
LEFTY1	-1.88283	-2.47438	-2.04253
LGI4	-4.89824	-0.841003	-0.882942
LINC00853	-0.322201	-1.75961	-0.446707
LINC00896	-2.16277	-1.19173	-1.05203
LINC00997	-0.875147	-0.931321	-0.60852
LINC01144	-0.722838	-0.427185	-0.522386
LINC01152	-1.39849	-1.39593	-1.52407
LINC01337	-1.28996	-1.57564	-0.880393
LINC01341	-2.44987	-1.15429	-1.61124
LINC01411	-1.49521	-0.867031	-0.0186718
LINC01759	-1.25124	-0.285343	0.655041
LINC01977	-1.74761	0.296357	-0.363124
LINC02044	-1.74466	-1.45812	-2.37408
LINC02193	-0.539203	-0.223733	-0.487708
LINC02298	-1.69129	-0.706769	-0.294531
LINC02352	-1.38126	-2.0701	-0.847871
LMO7-AS1	-0.961287	0.340595	-1.53724
LRMDA	-0.158081	-0.706719	-0.647814
LRRC73	-2.77217	-1.87408	-1.507
LRRK2	0.0251513	0.160924	0.112835
LUM	-0.777436	-2.36393	0.02184
MAOB	-3.23369	-0.924837	-0.682251
MAPK13	0.0179138	0.0324281	-0.865946
MATN4	-0.377368	-0.645285	-1.04326
MCF2L	-1.118	-1.0819	-0.371116
MIR101-2	2.77137	-0.407184	-4.22529
MIR103A2	-0.836525	-0.750902	-3.88992
MIR1254-1	-2.76067	-1.46616	-2.21238
MIR16-1	1.23311	-2.87713	-4.40019
MIR16-2	1.68552	-1.94788	-2.2033
MIR191	-2.35766	-2.94919	-3.56675
MIR30C2	-4.20795	-3.31858	-3.96243
MIR30E	-0.703833	-1.14981	-4.24055
MIR374B	-4.1921	-2.34093	-3.94658
MIR451A	0.47675	-2.42134	-5.11949
MIR486-2	2.24817	-0.635641	-4.45637
MIRLET7F1	0.00816031	-3.05878	-2.84205
MIRLET7G	-0.407531	-3.29291	-3.93676
MMP23A	-1.99358	-1.09266	-1.62122
MMP23B	-1.13346	-1.14572	-1.01167
MMP9	-2.04469	-1.73641	-1.53434
MOB3C	-0.717174	-2.21795	-1.15611
MPV17L	-4.59581	-3.70644	-4.35029
MPZL2	-2.86685	-3.46435	-1.59632
MRPL2P1	-0.607874	-0.711535	-2.28289
MTMR7	0.600475	0.367083	0.556659
MYOD1	-0.756873	-1.13321	-0.750234
MYOM2	-2.0282	-0.913862	-1.07242
N4BP2L1	-0.0676651	0.328301	-0.141032
NBEAP3	-2.78829	0.511103	0.699113
NDUFA4L2	-1.00513	-0.19939	-2.17765
NEURL2	-2.09428	-0.980068	-0.849216
NEUROG2	-1.10068	-2.52609	-0.963309
NGFR	0.213548	-3.07756	0.352559
NIFKP6	-1.01498	-2.51696	-0.708176
NOTCH4	-0.552643	-1.57645	-0.694927
NPM1P46	-0.342135	-1.25753	-2.04338
NPM1P48	-0.995335	-1.26827	-0.979807
NPPA-AS1	-0.832942	-0.338982	-2.07152
NR2F2-AS1	-1.30061	-1.22341	-1.2963
NT5E	-2.22242	-1.92078	-0.18176
NTNG1	-3.5366	-0.632801	-2.57417
NTS	-1.74198	-2.01573	0.0532104
NUTF2P2	-0.646259	-1.91361	-2.09231
NWD2	-1.3229	-0.218718	-3.54991
NYAP1	-2.87719	-1.58234	-1.09706
ODF3L2	-1.27929	-0.563414	-2.31446
OR7E158P	-1.10666	-0.809445	-2.95294
OR7E21P	-1.07034	-0.764432	-2.03328
OR7E53P	-1.29439	-2.46702	-2.45227
OSBPL7	-1.14789	-0.56831	-0.755706
OSTN	-0.554829	-0.012883	-2.90292
OXTR	-2.77534	0.108064	-0.920576
P4HA3	-1.99392	-3.54724	-0.641216
PADI2	-0.370699	-2.28954	0.140854
PALM2	-1.94418	-2.23023	-1.48892
PAUPAR	-1.45315	-1.8245	-0.554308
PCDH19	0.124861	0.102042	-0.390816
PCDHB13	-0.293812	-1.57654	-1.38157
PDCD4-AS1	-0.941591	-0.90872	-1.89547
PFN4	-0.276323	-3.41865	-0.607887
PHBP20	-0.452414	-0.880604	-0.599073
PHBP21	-1.06753	-2.97372	-1.46421
PILRA	-0.66029	-1.67782	-0.55305
PILRB	-0.797319	-1.08066	-0.190472
PKD2L2	-1.17041	-2.35068	-0.514769
PKN2-AS1	-1.73949	-1.1745	-1.30375
PLA2G4C-AS1	-4.19839	-2.34722	-3.02241
PLCB2	-1.4403	-0.912293	-0.919031
PLEKHA6	-1.18232	-3.31713	-0.0915206
PLIN5	-1.6807	-0.968627	-1.65595
PLPPR4	-0.814582	-3.86457	-1.00083
PNCK	-2.70488	-0.822622	-2.90574
PNMT	0.00691267	-1.27426	-2.43164
PNPT1P1	-1.56782	-2.7414	-0.0257211
POC1B-AS1	-0.829263	-0.0114772	-0.268194
POU2F2	-0.818107	-1.18977	-0.556929
PPL	-0.448287	-1.47105	-1.53771
PPP1R1C	-0.44741	-1.47033	-1.72243
PPP1R27	-0.640889	0.0843593	-1.25769
PRR15	-0.108591	0.372329	1.15024
PRRT1	-0.829095	-0.532819	-1.06086
PRSS37	-4.20795	-3.31858	-3.96243
PSD	-1.77704	0.341984	-1.27194
PSMB9	-2.17355	-1.13215	-2.62153
PTF1A	-0.891225	-0.598183	-2.65396
PTGER2	-2.23556	-0.510806	-0.117863
PTGFR	0.0186217	0.322577	0.196423
PTHLH	-0.583212	-1.68177	-0.178155
PTOV1-AS1	-1.23647	-2.51777	-1.0666
PTP4A2P1	-0.0441235	-0.392878	-0.88228
PTPN6	-1.66315	-2.83605	-2.21491
PTPRN2	-1.15358	0.14612	-0.586124
PYGM	-4.32047	-0.988345	-1.98884
RAB28P5	-2.12452	-0.947269	-1.527
RAB38	-1.04032	-1.74448	-2.1744
RAB39A	-1.64242	-1.07946	-1.5942
RAB41	-0.578288	-0.285601	-1.36777
RCN1P2	-2.75224	-2.34021	-1.19426
RCN3	-0.0451092	-2.44867	-0.573972
RF00092	-1.74369	-1.43411	-2.37758
RFPL3S	-1.22102	-2.80838	0.158656
RHOQP1	-0.278392	-3.42089	-1.5272
RIMS2	-2.10495	-0.0568542	-1.04806
RIPOR2	-0.825421	-1.2679	-0.0696006
RN7SL521P	-0.482086	-0.561188	-1.10149
RNU6-13P	-1.80162	-1.50332	-1.42466
RNU6-41P	-1.16247	-0.851829	-0.489621
RNU6-94P	-0.970441	-2.57419	-1.40069
RNY4P10	-1.10357	-0.798445	-3.29806
RNY4P27	-2.76861	-3.3164	-3.96026
RNY4P7	-0.923605	-1.03117	-2.28843
RPL12P41	-0.113383	0.352442	-0.377898
RPL21P10	-0.396342	-1.6834	-0.723356
RPL22P11	-1.77733	-2.36144	0.320905
RPL22P16	-0.720686	-2.01076	-2.16823
RPL23AP53	-0.422005	-3.18217	-0.832044
RPL29P30	0.0665219	-1.04649	-0.51039
RPL31P35	-0.184091	-2.3606	-0.71085
RPL5P11	0.170013	-1.25352	-1.2344
RPL6P30	-0.866031	-1.55541	-2.17703
RPL7AP31	-0.825837	-1.27054	-2.01109
RPL7AP57	-2.7786	-0.895973	-0.979845
RPL9P29	-1.38885	-0.481277	-3.63224
RPS20P24	-2.09154	-0.46385	-1.17821
RPS23P5	-0.560438	-1.56777	-3.13473
RPS24P7	-1.5652	-3.69867	-1.85722
RPS27AP6	-2.31812	-1.02418	-0.643865
RPS3AP36	-0.659247	-0.101033	-1.47895
RPS3AP37	-0.445501	-2.34459	-1.87323
RPS7P6	-2.15117	-2.74269	-2.0245
RPS8P4	-1.23375	-0.190884	-0.389204
RPSAP3	-0.859341	0.0238212	-2.22023
RPSAP70	-2.26305	-0.955715	-0.737496
RSPO4	-2.76228	-3.31032	-2.93373
RUNDC3A	-0.845445	-3.60376	-0.532655
S100A4	-0.494588	-0.608133	0.0162955
S100P	-4.43218	-1.69784	-1.73769
SALL4	-2.42553	-1.11313	-1.85672
SATL1	-0.445791	-2.3568	-0.634393
SCIN	-2.24622	-0.93913	-1.36285
SCN2B	-2.05924	-2.75733	-1.4189
SCUBE1	-2.38449	-1.08129	0.0171518
SEMA3B	0.463259	0.0447869	0.248256
SEMA6B	-1.15947	-2.73172	-1.08458
SEPT7P8	-0.758546	-3.29649	-2.08505
SH2D6	-3.15599	-1.84272	-1.94692
SH3D21	-0.579627	-0.94983	-1.85206
SINHCAFP3	1.12342	0.316418	-0.409256
SKOR1	-1.97594	-1.08658	-0.782428
SLC10A5	-0.8881	-1.0807	-1.56637
SLC11A1	-0.291976	-0.959357	-0.460665
SLC12A5-AS1	-3.69088	-0.793343	0.000918989
SLC22A31	-2.00139	-0.693544	-0.997067
SLC26A1	-1.72401	-0.185907	-1.80828
SLC30A10	-0.586323	-3.35205	-1.04809
SLC6A1	-4.15601	-2.30483	-1.27661
SLC6A16	-2.4318	0.0377143	0.501712
SLCO4A1-AS1	-4.33195	-3.44257	-2.2134
SMAD5-AS1	-1.96824	-2.66212	-1.53948
SMC5-AS1	-1.18584	-2.35108	-0.373536
SNED1	-0.955402	0.147677	-0.438405
SNORC	-0.686968	-2.1279	-0.280174
SNORD4B	-2.15078	-1.84084	-1.4853
SNORD5	-1.28706	-1.56996	-2.21529
SNORD6	-1.14919	-0.260833	-1.57485
SNRPCP4	-2.76262	-0.88107	-3.95709
SOCS2-AS1	0.823834	-0.458522	-0.206372
SORCS1	-2.38296	-0.664641	-1.26329
SP2-AS1	-0.165407	-0.224024	0.0433598
SP6	-0.425236	-3.18284	-2.01794
SPATA4	-4.44474	-0.708532	-2.60049
ST7-AS1	-1.22612	-0.788357	-2.31621
STAC3	-1.42166	-2.11421	-1.74035
STIP1P3	-1.86975	-1.56256	-1.10477
SUGT1P3	-1.33991	-1.88496	-1.00904
SULT1A3	-0.166901	-1.34362	-1.67197
SULT2A1	0.0271844	-2.37324	0.21307
SUMO1P4	-2.74536	-3.29444	-1.58787
SUMO2P6	-0.866569	-1.5674	-0.561981
SYNPO	-0.735654	-3.61336	-1.07301
TAT-AS1	-3.24279	-0.924624	-2.81431
TBC1D3H	-0.770272	-0.879238	-0.715926
TBC1D8	-0.820883	-0.505701	-0.684423
TBX19	-1.00922	-0.92871	-1.499
TCP11L2	-0.543944	-0.994995	-1.57654
TDH	-0.986676	-0.366241	-0.732156
TEKT2	-0.197679	-0.889313	-0.844452
TERT	-0.892738	0.411673	0.241157
TGFB2	-0.497397	0.0704807	-0.61193
TGFB2-AS1	-1.73748	-0.846503	-2.9557
THBD	-3.08142	-2.19318	-3.45573
THSD7A	-0.867641	-1.57082	-1.01814
TLE2	-1.03801	-0.656863	-1.01416
TLE6	-1.64434	-1.92639	-1.636
TLR3	-1.73356	-3.28693	-2.92511
TMC3	-1.72082	-2.40891	-1.67203
TMEM132E	-0.880815	-0.760971	-0.688977
TMEM151A	-1.52315	-3.11466	-0.312923
TMEM202-AS1	-1.15525	-0.857794	-0.624341
TMEM217	-0.719071	-0.999919	-1.25421
TMEM221	-0.841095	-0.11971	-1.34641
TMEM225B	-1.71408	-0.516099	-1.38355
TMEM63C	-0.663675	-0.890375	-1.17696
TMIE	-1.17336	-2.34576	-1.19331
TMPOP2	0.294406	-3.10256	-1.65304
TNFSF4	-0.801616	-2.08779	-0.910219
TOB1-AS1	-0.29022	-1.0434	-1.07546
TOB2P1	-2.46972	-1.1756	-1.02386
TRAF1	-1.35372	-1.73136	-0.231859
TRHDE	-1.86935	-1.56705	-2.09585
TRPA1	-0.264513	-1.76706	-0.520483
TTC41P	-1.88484	-2.46666	-0.679651
TTTY15	-0.171083	-2.35633	-0.181467
TUBG1P	-1.71152	-1.39956	-1.67861
U47924.2	0.250744	-0.660519	-0.388964
UBAP1L	-0.739678	-0.772693	-2.51294
UBE2CP3	-0.60746	-1.00639	-0.686339
UBE2V1P2	-0.730738	-2.0192	-2.09978
UCP3	-0.163804	-2.34035	-3.00565
UNC13A	-1.19524	-0.887009	-1.76628
UNC5A	-3.07835	-1.197	-0.237959
UPF3AP1	-0.818789	-0.347402	-0.0952895
URAD	-1.75222	0.361356	-1.45654
URAHP	-2.00384	-1.28284	-1.30413
USH2A	-1.2798	-2.4595	-1.28897
VIPR1	0.00102995	-0.585133	0.211711
VSTM2L	-1.48578	-0.17021	-1.84522
WDR11-AS1	-1.2167	-1.33292	-2.56961
XYLT1	-1.7321	-2.00433	-1.81517
Z83851.2	-2.38325	-1.08654	-0.724718
ZNF385C	0.105631	-2.29343	0.273999
ZNF471	-1.5557	-2.74186	-0.886033
ZNF506	-2.92942	0.177577	0.888091
ZNF582-AS1	-0.603878	-1.39776	-2.63979
ZNF596	-1.63072	-0.181817	-2.37818
