# Supplementary material for: MLL-AF4 and a murinized pSer-variant thereof are turning on the nucleolar stress pathway
Source: Cell Biosci. 2022 Apr 25;12:47. doi: 10.1186/s13578-022-00781-y (PMC9036721; doi:10.1186/s13578-022-00781-y)
Supplement: Supplementary file 8 — Additional file 8: MA4 volcano. [file 13578_2022_781_MOESM8_ESM.xlsx]

## Sheet: Sheet1
gene symbol	pvalue	log2	minus log 10
MADD	0.608239	0.135394	0.215926
MAST2	0.986465	-0.00456404	0.00591844
STRN	0.46906	0.145563	0.328772
PCLAF	0.508028	0.059638	0.294112
ZNF32	0.496122	0.121064	0.304412
HIST1H1E	0.258728	1.08899	0.587156
LURAP1L	0.49611	-0.910757	0.304422
PDHB	0.160787	0.128149	0.79375
MRPL49	0.198861	0.176737	0.701451
SCP2	0.39063	0.0908548	0.408234
CDC42EP2	0.443553	0.25868	0.353054
RGPD6	0.297098	-0.306472	0.5271
PROX1-AS1	0.738227	-0.712679	0.13181
ATP6V1E2	0.581246	-0.247117	0.23564
KLHL17	0.3915	0.370195	0.407268
DBET	0.775875	1.43083	0.110208
NUDT3	0.59984	0.064467	0.221965
KIF26B	0.818406	0.141242	0.0870314
KLHL35	0.709798	-2.00812	0.148865
MYOCOS	0.967664	0.0380221	0.0142756
EIF4ENIF1	0.606407	0.113708	0.217236
TRIM46	0.790002	-0.238276	0.102372
CXCR1	0.902205	0.667197	0.0446948
ARPC2	0.206826	-0.0913638	0.684394
TSACC	0.966931	0.0188707	0.0146043
CCT3	0.0111369	0.128562	1.95324
NFIA	0.914849	-0.0180209	0.0386507
SLC39A9	0.102978	-0.279562	0.987257
BCLAF1	3.65547e-05	0.331471	4.43706
DIRAS3	0.769356	-0.357432	0.113873
VAMP8	0.128507	-0.416091	0.891075
ACTR1B	0.11966	-0.266934	0.92205
RSF1	0.459038	-0.135161	0.338151
EMP2	0.506534	-0.0969155	0.295391
KCTD11	0.130317	-1.15684	0.885
SZRD1	0.0286763	0.253335	1.54248
LRP5	0.279636	-0.309448	0.553407
TBCE	0.313776	0.136438	0.50338
PDZD9	0.577606	-1.66262	0.238369
RTKN2	0.435588	0.133101	0.360924
PNMA8A	0.868711	-0.0262846	0.0611246
FARP2	0.458572	0.12636	0.338593
KIAA1324L	0.606216	-0.166115	0.217373
SP8	0.541666	0.329309	0.266269
MIOS	0.0386995	0.472955	1.41229
MOB1A	0.380507	0.0954927	0.419638
MAML1	0.152338	0.24883	0.817192
TIAL1	0.815344	0.0223864	0.0886591
ARMC3	0.542637	1.43874	0.26549
MELK	0.834301	0.0307161	0.0786774
SLITRK5	0.178839	-0.213787	0.747539
MYL12A	0.539899	0.0673463	0.267687
ZNF778	0.925736	0.0295449	0.0335129
CNOT7	0.596738	0.0642616	0.224216
TMEM184B	0.449558	0.107512	0.347214
MTOR	0.929283	-0.0142134	0.0318519
ZNF768	0.973976	-0.00532316	0.0114519
ZNF521	0.361324	0.641057	0.442104
ZNF81	0.613244	-0.324853	0.212367
KLHDC1	0.861643	0.280296	0.0646725
DRAP1	0.508297	-0.0974535	0.293883
LONRF3	0.547627	-0.401059	0.261515
MCMBP	0.268885	0.112048	0.570433
FAM171A2	0.647642	0.141104	0.188665
KLHL20	0.27506	-0.266253	0.560572
SCHIP1	0.979337	-0.00754351	0.00906774
TOB2	0.343274	-0.158932	0.464359
SNAI1	0.22356	1.21804	0.650607
MOCS3	0.749106	0.0963412	0.125457
STAU1	0.309011	0.109453	0.510027
CDH26	0.904159	-0.240596	0.0437553
ZNF444	0.94747	0.0136022	0.0234345
SPTY2D1OS	0.703495	0.169847	0.152739
RPL26	2.44535e-07	-0.318284	6.61166
PAQR5	0.202874	-0.404994	0.692774
UBE2J2	0.0495224	0.287969	1.3052
TBC1D23	0.725794	-0.0788256	0.139186
OAZ1	1.90082e-05	0.262432	4.72106
HS3ST1	0.624837	0.64879	0.204233
CD99	0.894199	-0.01129	0.0485659
RPS27	0.000149527	-0.262299	3.82528
BET1L	0.260546	-0.21317	0.584115
RPL23A	0.00021728	-0.208898	3.66298
G2E3	0.721505	-0.0618018	0.14176
ITM2C	0.58238	-0.0845991	0.234794
USP37	0.70555	0.0845971	0.151472
TTLL4	0.600021	0.119736	0.221833
HECTD1	0.686203	-0.0648701	0.163547
PEX3	0.0460513	0.388314	1.33676
SERPINE2	0.723735	-0.0817191	0.140421
PSMG3-AS1	0.619997	0.274241	0.20761
EID2	0.349854	0.145877	0.456113
CRLF3	0.318598	0.213059	0.496757
RNPEP	0.999495	-7.45319e-05	0.000219433
DMRTA1	0.115392	-3.26074	0.937823
NUFIP1	0.463561	0.171642	0.333893
CPEB2-DT	0.902205	0.667197	0.0446948
MARS2	0.391459	0.191206	0.407314
DHRS13	0.673298	0.156453	0.171793
CACNB3	0.458161	-0.341751	0.338982
KLRG2	0.318566	0.38902	0.4968
CKMT1B	0.278841	0.174947	0.554643
ADAMTS6	0.619981	-0.557886	0.207621
KPNA6	0.975874	0.00277182	0.0106064
TMEM80	0.896567	0.0225793	0.0474174
TEP1	0.363225	-0.472173	0.439824
SIX5	0.557318	-0.198213	0.253897
TOB1	0.171009	0.191396	0.766982
ZFAND4	0.0932468	0.715004	1.03037
HEXDC-IT1	0.868708	0.667252	0.0611261
GAD2	0.902201	0.667221	0.0446965
ABI1	0.448956	0.119512	0.347796
YME1L1	0.511948	-0.0593927	0.290774
NOTCH2NL	0.336662	-0.711868	0.472806
ZNF536	0.677435	-0.185555	0.169133
KISS1R	0.935615	-0.124369	0.0289029
ARID3A	0.0243254	-0.352185	1.61394
EPAS1	0.712547	0.119828	0.147186
STRC	0.618579	1.45586	0.208605
ANKRD20A3	0.943743	-0.0958433	0.0251464
MSRB3	0.165912	0.368133	0.780121
VWA8-AS1	0.600179	-1.94851	0.221719
MTCH1	0.00431174	0.280115	2.36535
NRM	0.158266	-0.386154	0.800613
PPP1R3E	0.0162418	-0.831188	1.78937
YBX3	0.0311311	-0.144106	1.50681
MAP3K10	0.710079	0.270232	0.148693
NPAS1	0.328227	-0.482744	0.483826
GMFG	0.749324	0.39182	0.12533
TENM1	0.0086569	-1.28021	2.06264
PAUPAR	0.600567	-0.421524	0.221438
FAM215B	0.753303	0.272507	0.12303
HPS5	0.0865142	0.513143	1.06291
RANBP1	2.26465e-06	0.272542	5.645
SPIRE1	0.431627	0.199814	0.364892
BTBD1	0.198967	0.185149	0.701218
LBHD1	0.267296	0.14324	0.573008
HSD17B10	0.0847191	0.162934	1.07202
AK1	0.60458	0.0857711	0.218546
SMC1A	0.770932	-0.0235114	0.112984
GNAT2	0.879877	-0.686641	0.055578
PRPF38B	0.984954	0.00245401	0.00658419
GSTM1	0.835991	-0.055148	0.0777986
BCL2L2	0.393404	-0.234554	0.405161
TUBG2	0.719742	-0.17001	0.142823
ZCWPW1	0.142821	-1.18714	0.845207
AP2S1	0.596649	0.0473456	0.224281
ITGB8	0.95681	-0.0636729	0.0191744
PON2	0.881713	0.0265022	0.0546726
COPZ1	0.941873	-0.00644951	0.0260076
HBP1	0.527446	-0.160548	0.277822
GEMIN7	0.0389582	0.372898	1.4094
SEMA3B	0.809777	-0.293035	0.0916344
SMPD2	0.845479	-0.0782327	0.0728971
RPL31	3.055e-06	-0.2627	5.51499
ZNF343	0.523095	0.247126	0.28142
MAB21L1	0.466486	0.497455	0.331161
EMX1	0.607445	-0.306084	0.216493
YOD1	0.00810154	0.447837	2.09143
CHM	0.565641	-0.121666	0.247459
SMYD5	0.270506	0.319916	0.567823
RAB11FIP5	0.0303124	-0.62009	1.51838
DYSF	0.885037	-0.29304	0.0530386
CCDC142	0.339553	0.505235	0.469092
EBP	0.652668	-0.0533726	0.185307
NCBP2	0.00249588	0.393582	2.60278
HDLBP	0.0035564	-0.234389	2.44899
MMP25-AS1	0.934331	0.0372359	0.0294991
MEGF6	0.236092	-3.25409	0.62692
SMIM2-AS1	0.658148	0.328602	0.181676
MIS18A-AS1	0.741771	0.350091	0.12973
AURKC	0.794494	-0.991752	0.0999092
CGB1	0.603455	-2.77024	0.219355
AZIN2	0.736823	0.209868	0.132637
ANO7	0.098405	1.26698	1.00698
GRIK2	0.768776	1.56526	0.1142
GJB7	0.708214	0.999749	0.149835
CGRRF1	0.080395	-0.424082	1.09477
FAM76B	0.716269	0.0951417	0.144924
DPY30	0.378852	0.0902742	0.421531
PLEKHB1	0.783468	-0.0953576	0.105979
EP300	0.386357	-0.141767	0.413011
L3MBTL2	0.279276	0.191598	0.553966
FAM72A	0.292649	0.233873	0.533653
CACNA1H	0.0768371	-0.880673	1.11443
SLC22A4	0.948634	0.166032	0.0229013
CSNK1G3	0.216413	-0.209718	0.664717
AGPAT4	1.19555e-08	-1.41472	7.92243
LRRC37B	0.272841	0.382462	0.56409
MTHFS	0.446718	-0.109872	0.349967
MIXL1	0.615167	-0.600703	0.211007
BCL7B	0.177667	0.220738	0.750394
YKT6	0.180672	0.18194	0.743109
LMO7-AS1	0.0277041	-3.838	1.55746
GCK	0.505907	2.57204	0.295929
TBL2	0.152964	-0.237424	0.81541
CHN2	0.806519	-0.122461	0.0933852
CLEC4F	0.552611	-0.846069	0.25758
TTC13	0.091277	0.362581	1.03964
NQO2	0.612388	0.0960639	0.212974
GALNT2	0.0997612	0.189865	1.00104
PEX6	0.12428	1.06791	0.905599
TRIM68	0.325053	0.38878	0.488046
POMT2	0.606019	0.132808	0.217513
PSME2	0.962797	-0.00816045	0.0164653
CYBC1	0.151765	0.33883	0.818828
PFAS	0.950428	0.00852639	0.0220807
HYI	0.0942622	-0.455051	1.02566
IRF2	0.127025	-0.700435	0.896112
MOBP	0.806574	1.32489	0.0933559
PFKFB4	0.688824	-0.199709	0.161892
PQLC2	0.0522934	-0.470488	1.28155
AP1S3	0.895229	0.046362	0.0480657
MAMDC2-AS1	0.448681	-2.02858	0.348062
ANAPC1	0.883538	0.0274705	0.053775
WEE2-AS1	0.573957	-0.726015	0.241121
PDIA3	0.000384156	-0.397696	3.41549
PLCG1-AS1	0.661819	1.44729	0.179261
WT1-AS	0.83877	0.320323	0.076357
CDC25A	0.627176	0.0566496	0.20261
PRR36	0.874502	-0.10145	0.0582392
EMC6	0.312848	0.113586	0.504667
RPS28	9.68872e-09	-0.345652	8.01373
MARCH10	0.885944	0.667245	0.0525936
TAF1L	0.846243	-1.04643	0.0725049
ACO1	0.327029	0.184076	0.485414
ARNTL2-AS1	0.761239	-1.64537	0.118479
MARCH8	0.465584	0.199955	0.332002
TSHR	0.764807	1.61433	0.116448
ADK	0.64159	-0.0603247	0.192742
PKD1L1	0.791507	1.42918	0.101545
SYN1	0.812912	-0.26942	0.0899564
M1AP	0.902205	0.667197	0.0446948
PSMB4	0.0857936	0.0966839	1.06655
SSBP4	0.884097	-0.0308216	0.0535003
GDF15	0.00531711	-1.95462	2.27432
PGPEP1	0.451191	-0.25131	0.345639
MED30	0.644685	0.105619	0.190652
RAD21	0.241291	0.107085	0.617459
PEX2	0.190354	0.266046	0.720437
LAMC2	0.690776	-0.495922	0.160663
SYNJ1	0.290719	0.271426	0.536527
LARP1	0.246398	-0.0880713	0.608364
PAXBP1	0.095697	0.319334	1.0191
QPCTL	0.892245	0.0508877	0.0495161
HFE	0.718453	1.93853	0.143602
ADH1B	0.761235	-1.6454	0.118481
SSUH2	0.418955	-2.76319	0.377832
MMP1	0.694696	1.44168	0.158205
PHLPP1	0.590993	0.160888	0.228417
SPRR2F	0.902205	0.667197	0.0446948
TEX11	0.902203	0.667208	0.0446956
VPS16	0.909436	-0.0313934	0.041228
ABCB4	0.805593	-0.411995	0.0938842
FLT4	0.533495	-0.162304	0.27287
CCDC58	0.0436013	0.244047	1.3605
C1orf146	0.268921	0.855742	0.570376
CATSPER1	0.709799	-2.00812	0.148865
TBC1D3I	0.701009	0.620864	0.154277
HLA-DPA1	0.00164967	-0.963397	2.7826
GCNT4	0.0181494	3.86666	1.74114
FUT2	0.727072	-0.501437	0.138423
EFCAB5	0.900653	0.19992	0.0454426
ZNF251	0.687999	-0.198972	0.162412
SVIP	0.217802	0.152968	0.661938
ANKRD16	0.5397	-0.221877	0.267847
MAN1A2	0.095301	-0.262528	1.0209
MIER1	0.532065	0.0882774	0.274035
TSNARE1	0.233017	0.947628	0.632612
XKR6	0.617134	0.276982	0.20962
ARL14	0.645366	1.53671	0.190194
RPRML	0.139647	-0.504471	0.854967
MCPH1	0.133946	-0.45992	0.87307
LYAR	0.017717	0.283459	1.75161
JSRP1	0.273188	1.07996	0.563538
MIDN	0.211974	-0.180132	0.673718
PCDHGA11	0.711028	0.449242	0.148113
HDHD5	0.311778	0.12985	0.506154
HADHA	0.0318971	-0.218544	1.49625
PSMB9	0.423252	-0.916926	0.373401
SORBS1	0.60415	-0.258322	0.218855
SCARNA22	0.234203	0.517261	0.630408
EAF1-AS1	0.870742	0.27152	0.0601104
MAGED4B	0.987002	0.0035338	0.00568175
WDR31	0.995658	-0.00492934	0.00188999
RNF128	0.96082	0.0139543	0.0173582
BEX2	0.0272272	-0.270857	1.565
MORC4	0.258415	-0.191663	0.587683
POLE3	0.0572451	0.178065	1.24226
PLA2G12B	0.565955	-3.05141	0.247218
PDK4	0.672443	-0.419394	0.172344
CTDSP1	0.912687	-0.0249733	0.0396781
PDZD4	0.277268	-0.625293	0.557101
CREB5	0.263824	-0.197592	0.578685
CES3	0.821248	0.111328	0.0855255
KSR1	0.0284267	0.87013	1.54627
HMGA1	0.307573	-0.0826758	0.512052
CES4A	0.902205	0.667197	0.0446948
FGFR2	0.293618	-0.242287	0.532218
PARP14	0.587506	-2.44137	0.230988
DHX8	0.970179	-0.00653314	0.0131482
MEF2D	0.0636037	-0.473411	1.19652
CAMK2A	0.902203	0.667208	0.0446956
CCDC183	0.626984	-0.336833	0.202743
SLC35C2	0.931081	0.0176955	0.0310127
CDKN2B	0.126414	0.390092	0.898205
CDKN2A	0.8349	-0.0133894	0.0783655
AMMECR1	0.58455	0.0912955	0.233178
CHRDL1	0.611604	0.628566	0.21353
PLD6	0.692476	-0.0865675	0.159595
HBZ	0.523273	-0.978396	0.281271
PNPLA7	0.280349	-2.29806	0.5523
DNTTIP2	0.0190144	0.303136	1.72092
SUB1	0.000252374	0.229938	3.59796
GOLPH3	0.724203	0.0531335	0.14014
FMO4	0.944974	0.0460746	0.0245802
MED14OS	0.653121	0.454007	0.185006
SKIDA1	0.0670458	0.652399	1.17363
SPAG4	0.363248	-0.882653	0.439797
HIST1H2BC	0.2988	-1.0476	0.524619
SDHA	0.852689	-0.0240304	0.0692093
NPIPB12	0.676731	0.159582	0.169584
RPL6	4.70213e-05	-0.211203	4.32771
SNX5	0.238883	-0.100418	0.621815
ORAI3	0.145615	-0.482332	0.836793
TRABD2B	0.615389	-0.364943	0.21085
CDK18	0.79501	-0.0770225	0.0996274
GPR89A	0.32338	-0.196511	0.490287
FGF8	0.72155	0.91236	0.141733
NPM3	0.320518	0.105914	0.494148
FBXO43	0.902203	0.667208	0.0446956
SUPV3L1	0.129591	0.234965	0.887427
FAM122C	0.153199	-0.663945	0.814745
FAM122B	0.0131735	0.337707	1.8803
LACTB	0.915075	-0.0279398	0.0385433
CORO2B	0.416226	1.48398	0.380671
ABCA7	0.69384	0.217973	0.158741
ARHGEF1	0.377286	0.26086	0.423329
XAB2	0.429942	-0.316078	0.36659
TOR1AIP1	0.33122	0.152889	0.479883
RGS16	0.0162568	-0.632681	1.78897
THAP9	0.416595	-0.364556	0.380286
TSPYL1	6.98428e-07	0.41567	6.15588
RNF187	0.170764	0.112671	0.767603
MAK	0.821501	-0.170306	0.0853917
RSPH4A	0.268743	1.92286	0.570663
RWDD1	0.475671	0.0663891	0.322693
FOXP1-AS1	0.709797	-2.00814	0.148866
CFAP54	0.258768	1.9523	0.587089
FUNDC1	0.132965	0.215856	0.876262
SCAMP5	0.100702	-0.501232	0.99696
SUPT7L	0.55049	-0.0916096	0.259251
SPIN2A	0.61329	0.413423	0.212334
NTPCR	0.139141	-0.161695	0.856544
ABCB10	0.435316	-0.0949921	0.361195
COG2	0.0291795	0.359028	1.53492
CAPN9	0.836622	0.667248	0.0774707
KDM6A	0.522713	0.145137	0.281737
ADGRA3	0.253771	0.326406	0.595558
EME2	0.848737	0.0852495	0.0712269
COMTD1	0.0429807	-0.337671	1.36673
MR1	0.531623	-0.214766	0.274396
PTRH1	0.404485	-0.298949	0.393098
PARP11	0.515134	-0.221277	0.288079
PNLIPRP1	0.872604	-0.687891	0.0591828
PPP1R32	0.91772	0.163418	0.0372897
ZNF48	0.968056	-0.0086149	0.0140995
MTFR1	0.534778	0.0950466	0.271826
KCNIP4	0.942243	-0.0978806	0.0258373
SPTLC1	0.136659	-0.219824	0.864362
NFATC2	0.412831	-2.00981	0.384227
RIMS4	0.154085	0.443268	0.812238
MAGEA12	0.447999	-1.82548	0.348723
VEGFA	0.03842	-0.383698	1.41544
JMJD6	0.000418919	0.566389	3.37787
ZNF578	0.902203	0.667208	0.0446956
GNPTG	0.43634	-0.16326	0.360175
SENP7	0.832238	-0.0684944	0.0797523
DDOST	0.000380834	-0.301146	3.41926
COG5	0.122913	-0.370991	0.910404
MYOZ3	0.902202	0.667219	0.0446964
DIRC2	0.840056	-0.0617867	0.0756919
TCF4-AS2	0.902202	0.66722	0.0446964
SCG3	0.644385	-0.412924	0.190854
GABRA3	0.761235	-1.6454	0.118481
SOX21	0.831047	-0.122498	0.0803743
RNF41	0.952785	-0.011632	0.0210049
SLC2A4	0.0650347	-1.56225	1.18685
TRIM49	0.846241	-1.04644	0.0725058
TMEM129	0.740685	0.0633122	0.130366
SPRY3	0.180633	1.72815	0.743203
PPIC	0.0332509	-0.297718	1.4782
NUP214	0.399356	-0.163631	0.398639
FAM78A	0.916219	-0.060496	0.0380008
GSAP	0.429012	-2.76373	0.367531
RRBP1	0.0606359	-0.368723	1.21727
FBXO48	0.500262	0.257863	0.300803
UQCC3	0.614969	-0.0740034	0.211147
ZNF155	0.708643	0.295818	0.149573
NFIX	0.717541	-0.127889	0.144153
CEP97	0.891054	0.0348087	0.0500959
TSFM	0.450573	0.091935	0.346235
SEMA6B	0.296514	-0.861933	0.527955
DHDH	0.338157	-0.963048	0.470882
NUCB1	0.0218322	-0.365099	1.6609
TULP2	0.559491	0.828242	0.252207
TWF2	0.238843	-0.229757	0.621887
ZNHIT1	0.137591	-0.174431	0.861411
VCX2	0.902205	0.667197	0.0446948
CLDN15	0.210495	-0.46192	0.676758
IRX3	0.316109	-0.278146	0.500163
EIF4EBP1	0.00575483	-0.251386	2.23997
P2RX2	0.557176	-1.6655	0.254007
VTRNA1-3	0.337972	0.570038	0.471119
MXD4	0.965108	-0.00617387	0.0154243
ABHD2	0.108651	0.284797	0.963967
WDR93	0.622233	-0.995249	0.206047
FANCI	0.775074	-0.0291333	0.110657
POLG	0.98281	0.00370298	0.00753047
ACSF2	0.12527	-0.521276	0.902152
FAM102A	0.405025	0.331149	0.392518
TMEM92	0.559936	-0.995976	0.251862
PIP5KL1	0.520799	0.925034	0.28333
HPRT1	0.0597111	0.132053	1.22394
SAMD14	0.362714	-1.15413	0.440436
EIF1B-AS1	0.962739	0.0575269	0.0164914
PLK1	0.0967459	0.182794	1.01437
RNU6-2	0.325283	-0.70487	0.487739
CLPX	0.273566	0.20366	0.562939
YY1AP1	0.857746	-0.0340646	0.0666415
KBTBD8	0.740908	0.124341	0.130236
FAM19A4	0.787648	0.628064	0.103668
EOGT	0.324117	0.330967	0.489299
IST1	0.0460637	0.277482	1.33664
RC3H2	0.0882178	0.218681	1.05444
INKA2-AS1	0.823769	0.174383	0.0841945
CGNL1	0.810893	0.204741	0.0910367
MKRN2OS	0.902202	0.667216	0.0446961
DENND5A	0.146655	-0.241796	0.833704
MYADM	0.03123	-0.517217	1.50543
SLC45A1	0.902197	0.66725	0.0446985
VAX1	0.287882	-0.686331	0.540785
NAP1L6	0.902202	0.667214	0.044696
ADD3	0.628749	0.0739212	0.201523
CHIC1	0.485546	0.304695	0.313769
DENND4C	0.154903	-0.390609	0.809939
IGFBPL1	0.772804	-0.961398	0.11193
CLCN3	0.229739	0.197675	0.638765
BAZ2B	0.939753	-0.0185916	0.0269861
YEATS2-AS1	0.749457	-1.64609	0.125253
GRK3	0.615178	-0.119687	0.210999
SLC39A8	0.74663	-0.0529093	0.126895
ENPP4	0.154963	-0.339812	0.809771
IFNGR2	0.321788	-0.135264	0.49243
SLC25A16	0.0168835	0.596112	1.77254
SHLD3	0.237095	0.521991	0.625078
LOXL1	0.437171	-0.40991	0.359349
ANKRD29	0.441835	-0.401354	0.35474
CCDC181	0.660405	0.117123	0.18019
JAKMIP1	0.827876	-0.139918	0.0820344
STAG3	0.699211	-0.785381	0.155392
CLVS2	0.583938	-0.408918	0.233633
SLC10A7	0.0682504	-0.61716	1.16589
C16orf87	0.483541	-0.107428	0.315566
TBC1D32	0.551134	0.174249	0.258743
MFAP3	0.616647	0.359782	0.209964
ELOVL6	0.723902	0.0679681	0.14032
PFKFB3	0.721628	-0.0681355	0.141686
TRA2A	0.000798813	0.305031	3.09755
PRH2	0.571656	2.16923	0.242865
ZNF627	0.460579	-0.30293	0.336696
ZNF789	0.973395	0.013158	0.011711
WDHD1	0.314128	0.182528	0.502893
SEMA3C	0.893511	-0.0410229	0.0489003
CHRNB2	0.902203	0.667209	0.0446957
UBE2Q1	0.0476708	0.215632	1.32175
IL6R	0.527501	0.466861	0.277777
ADAR	0.560704	0.0569813	0.251267
ARPC5L	0.988039	0.00197429	0.00522592
MRPS18A	0.0379764	0.335529	1.42049
SART1	0.645921	-0.0715265	0.18982
NAPA	0.737893	-1.64685	0.132007
CDC37	0.204918	0.108863	0.68842
RABAC1	0.0969559	-0.217731	1.01343
GFPT2	0.179528	0.48415	0.745867
SLC19A3	0.228869	1.97942	0.640413
SYNGR2	0.587919	0.0601286	0.230683
NUP210	0.810969	0.0351521	0.0909957
SIPA1L2	0.522157	-0.197953	0.282199
CACNG7	0.642395	-1.97429	0.192198
CCDC146	0.539717	-0.592554	0.267834
LGALS3	0.180422	-0.738211	0.743711
UBQLN2	0.596213	-0.07157	0.224599
RILPL1	0.535963	-0.203255	0.270865
CMTM1	0.418071	-0.849808	0.37875
TXLNA	0.0762223	0.20918	1.11792
ARHGEF33	0.902201	0.667226	0.0446968
MTBP	0.887842	-0.0501016	0.0516642
SNTB1	0.0480384	-0.918815	1.31841
RNU4ATAC	0.494251	-0.611722	0.306052
INPP5E	0.138524	0.352137	0.858474
MNAT1	0.630862	-0.0685251	0.200066
MID1	0.0300739	-0.238066	1.52181
MFSD13A	0.955595	-0.0136895	0.0197261
CBWD1	0.0149092	0.320893	1.82655
MYOF	0.156251	2.76926	0.806178
FXYD4	0.902205	0.667197	0.0446948
PTPRG	0.974274	-0.00817476	0.0113188
ANKRD42	0.648676	0.147272	0.187972
PDLIM7	0.381396	-0.213608	0.418624
SRP72	0.34105	-0.094678	0.467182
IL18BP	0.442854	-1.13257	0.353739
CNP	0.0785335	0.217922	1.10495
CD3EAP	0.547034	0.107565	0.261986
MNX1-AS2	0.792792	-0.257887	0.100841
RAP1A	0.50785	0.0818631	0.294265
MRPS30	0.853399	-0.0249932	0.0688477
GATD3B	0.744954	-0.0504844	0.127871
NNT	0.0918678	-0.233737	1.03684
HDAC1	0.0300714	0.167605	1.52185
C1GALT1C1L	0.655197	-0.460473	0.183628
MADCAM1	0.857902	0.66725	0.0665623
ANK3	0.998282	-0.000534667	0.000746751
PALM	0.115092	-0.515033	0.938955
GADD45B	0.719316	0.134702	0.14308
SLC7A9	0.528351	-2.07523	0.277078
BUD31	0.641918	-0.0530655	0.19252
PDAP1	0.643716	0.0505548	0.191306
ALDH3A2	0.262847	0.149022	0.580297
PTCD1	0.824192	-0.0525513	0.0839719
STRADA	0.24051	2.38929	0.618866
CD59	2.72482e-06	0.585648	5.56466
SNHG7	2.67361e-09	-0.662815	8.5729
C7orf31	0.683981	-0.162407	0.164956
FALEC	0.886131	-0.251886	0.0525021
SYTL1	0.26176	-0.931475	0.582097
RARS	0.0891578	0.171526	1.04984
WWC1	0.994184	-0.00216656	0.00253341
SRGAP2	0.351755	0.174026	0.45376
H2AFY	0.0512274	0.159597	1.2905
SCN9A	0.0515375	-1.12273	1.28788
RASSF6	0.468075	-1.59102	0.329685
SDC2	0.18507	-0.15913	0.732664
UHRF1BP1L	0.74428	-0.0962807	0.128263
NOP2	0.20964	0.383541	0.678526
GAPDH	0.170196	-0.0706486	0.769052
CHD4	0.384896	-0.0794498	0.414656
SLC47A1	0.564593	-0.147152	0.248265
KPNA1	0.320314	0.153416	0.494424
RPGR	0.583274	0.183076	0.234127
CHIC2	0.372072	0.237317	0.429372
BRCA1	0.994353	0.000990371	0.00245931
ORAOV1	0.0831275	0.476134	1.08026
ALDH1A3	0.807246	-0.136328	0.0929943
RNF185	0.950639	0.0141544	0.0219842
SHISAL1	0.98714	-0.00945998	0.00562124
CDR1	0.709797	-2.00814	0.148866
BOLA3	0.133705	0.131391	0.873853
CDC42EP3	0.842389	0.0553298	0.0744872
ZSCAN21	0.449631	-0.233005	0.347144
YBEY	0.125507	-0.475251	0.901331
PLSCR4	0.948261	-0.0494888	0.023072
SATL1	0.331471	-1.6625	0.479555
TCTE3	0.488449	-0.320731	0.311181
UBE2G2	0.0887448	0.168762	1.05186
SMIM10	0.945716	-0.0162342	0.0242393
TMEFF1	0.956519	0.0109613	0.0193062
SETD2	0.893129	0.0272428	0.0490856
REEP4	0.306832	-0.227027	0.5131
TMEM30A	0.31856	-0.129531	0.496809
COX7A2	0.644206	0.024755	0.190975
GMDS	0.270783	-0.188952	0.567378
WRB	0.0638134	0.258993	1.19509
TNRC18	0.20562	0.348971	0.686935
BLMH	0.0286613	0.27976	1.5427
SLC6A4	0.683859	1.44346	0.165034
BBOX1-AS1	0.368039	-0.584084	0.434107
GALNT12	0.703161	-0.119093	0.152945
NTN4	0.243275	1.89155	0.613902
JKAMP	0.0845754	0.286276	1.07276
ENPP3	0.615382	1.01691	0.210855
ZNF35	0.782592	-0.170148	0.106464
ABCA6	0.752538	-0.928284	0.123471
ABCA5	0.324546	-0.273259	0.488723
MYLPF	0.337498	0.547731	0.471729
WASHC5	0.428486	0.128608	0.368063
RSBN1L	0.274396	-0.162864	0.561622
RPP25L	0.539322	-0.0825099	0.268152
ATP5MF	0.00438065	0.171286	2.35846
SETD6	0.77199	0.0562402	0.112388
SPTSSA	0.726595	0.0482259	0.138708
PABPC4	0.0338099	0.176098	1.47096
LAMA1	0.207528	-0.413522	0.682922
LRCH4	0.146167	-0.494662	0.83515
TNFAIP8L3	0.923739	0.206298	0.0344509
ZNRF3	0.777662	0.0631027	0.109209
ADPRHL2	0.894638	0.0245492	0.0483526
PNPLA4	0.411988	-0.328105	0.385116
MPPE1	0.176207	-0.414588	0.753976
KIAA0895	0.786548	0.075941	0.104275
UBR1	0.559961	0.154673	0.251842
SNAPC4	0.91394	-0.0286162	0.0390822
TCHH	0.764953	0.667256	0.116366
VCPKMT	0.31685	-0.315163	0.499146
SOS2	0.0200105	-0.757821	1.69874
DAD1	0.133265	0.110826	0.875285
SEC23IP	0.307556	0.132168	0.512075
SPATA20	0.911877	-0.0429393	0.0400639
CACNA1G	0.243054	1.61739	0.614296
SYCE3	0.673883	-0.671005	0.171416
TOGARAM1	0.505229	-0.252726	0.296511
SLC9B1	0.936419	-0.144227	0.0285297
EVL	0.438466	-0.133732	0.358064
H2AFZ	0.00109052	0.172907	2.96237
DNAJB14	0.302595	-0.234114	0.519139
SSBP3-AS1	0.685507	2.17285	0.163988
MRPL33	0.142037	0.146163	0.8476
SNHG3	0.00465777	0.238521	2.33182
GLMP	0.441726	-0.115472	0.354847
BDH2	0.499909	0.153494	0.301109
PICK1	0.178398	-0.30071	0.748611
DEPDC5	0.413097	-0.288276	0.383948
GNA13	0.513009	0.100503	0.289875
TTC28	0.991434	0.00203142	0.00373616
HOXB8	0.0563869	0.515333	1.24882
SNRPD2	0.274508	0.0664147	0.561446
OPA3	0.395378	0.201657	0.402988
FOSB	0.716839	-0.48529	0.144578
EML2	0.826652	-0.0701917	0.0826774
RTN2	0.378274	-0.299193	0.422193
TMC4	0.248376	-2.98329	0.604891
PEPD	0.836433	0.0265744	0.0775688
CYP2S1	0.361391	-0.615146	0.442023
AXL	0.00609838	-3.97011	2.21479
NFKBID	0.16776	0.93681	0.775312
URB1-AS1	0.500356	0.187771	0.300721
ACY1	0.50496	-1.32826	0.296743
SIRT1	0.347204	0.155166	0.459415
MOGS	0.616795	0.0873382	0.209859
GEMIN8	0.812047	-0.0744571	0.090419
C8orf31	0.81119	-0.199824	0.0908772
DLGAP1-AS1	0.95597	0.120015	0.019556
AVIL	0.79964	0.391086	0.0971056
ZNF655	0.838596	0.0350967	0.0764473
ROR1-AS1	0.750191	-0.92413	0.124828
RNU5D-1	0.194043	3.0478	0.712102
HSFX4	0.82267	0.66725	0.0847741
CIB2	0.238223	-0.249175	0.623016
WASF2	0.676034	0.0568164	0.170031
PIGV	0.122465	0.611647	0.911987
HOXD3	0.400404	-1.18514	0.397501
CHN1	0.920365	0.0265942	0.03604
MTX2	0.566754	0.0826885	0.246605
PDE11A	0.916946	-0.0861641	0.0376561
GTF3A	0.514105	-0.062452	0.288948
RASL11A	0.399159	-0.471788	0.398854
GMPPB	0.000211852	-0.781535	3.67397
STEAP2	0.214007	-0.470936	0.669571
ZNF622	0.00708398	-0.593726	2.14972
NEO1	0.865289	-0.037277	0.0628386
SNX33	0.587311	0.230676	0.231132
KLHL15	0.154843	-0.269709	0.81011
FBXO45	0.444004	0.180123	0.352613
SPERT	0.902203	0.667208	0.0446956
KCNB1	0.251987	2.02301	0.598622
FAM237A	0.791507	1.42918	0.101545
CUL7	0.648744	-0.172153	0.187927
SMIM5	0.902203	0.667209	0.0446957
ZNF260	0.90883	0.0324685	0.0415176
TRIM36-IT1	0.550247	1.28109	0.259442
NCAN	0.138021	3.07779	0.860056
PIGS	0.853915	0.0212258	0.0685853
TSEN2	0.516516	0.164621	0.286916
ZDHHC1	0.46449	0.625035	0.333024
TPPP3	0.843519	0.163279	0.0739053
ADPRM	0.0429901	-0.790834	1.36663
SLC35B1	0.00256112	-0.326357	2.59157
CYSTM1	0.421537	-0.115725	0.375164
ZNF584	0.820599	-0.0894801	0.0858693
ENDOU	0.730763	-1.64734	0.136223
SLC26A10	0.924848	-0.106988	0.0339295
ACVR1B	0.385872	-0.185562	0.413557
OS9	0.00271164	-0.344316	2.56677
IGF2	0.283521	-0.647623	0.547415
LSG1	0.589388	0.146826	0.229599
SPHAR	0.36145	0.210733	0.441952
VWA8	0.128855	-0.38567	0.889898
RGCC	0.745035	-0.129	0.127823
ZXDB	0.640973	0.145176	0.19316
IRF9	0.155605	1.13062	0.807976
ZNF568	0.260591	0.874184	0.58404
KLHL5	0.570877	-0.159375	0.243457
FAM149A	0.450156	0.53372	0.346637
EFHB	0.289841	-2.29747	0.537841
SNTG1	0.709799	-2.00812	0.148864
GH1	0.902201	0.667226	0.0446969
IFT80	0.346627	0.22493	0.460137
SLC2A8	0.208362	0.285719	0.681182
STXBP1	0.801814	-0.0519053	0.0959263
ANGPTL2	0.902203	0.667208	0.0446956
IK	0.239737	0.144405	0.620265
MOB3A	0.448693	0.253159	0.34805
KRCC1	0.224524	-0.401313	0.648738
RAB5C	0.430907	0.1018	0.365617
KAT2A	0.303817	0.175662	0.517388
DHX58	0.755495	0.642793	0.121768
PM20D2	0.0673033	-0.203079	1.17196
RARS2	0.637527	0.0972278	0.195501
HAGH	0.486491	-0.105508	0.312925
ANP32C	0.648515	-0.819287	0.18808
ZNRD1	0.0841543	0.264962	1.07492
EEFSEC	0.681168	-0.1276	0.166746
USP53	0.948269	0.0142211	0.0230685
SETD7	0.422036	-0.115414	0.374651
ACTR3B	0.623375	0.0955317	0.205251
ARHGAP24	0.887036	-0.156912	0.0520585
PELI2	0.378611	0.264603	0.421807
ZNF318	0.520159	0.167148	0.283864
ACTR5	0.476162	0.200578	0.322245
WFDC2	0.99813	-0.00647713	0.000812819
SHISAL2B	0.690297	0.227489	0.160964
FAM83D	0.00781916	0.504111	2.10684
PPP1R16B	0.441717	-0.599292	0.354855
TSPAN4	0.591827	0.157133	0.227805
KNL1	0.893949	0.028554	0.0486871
ALG14	0.312554	-0.18777	0.505075
HAUS2	0.864104	-0.0332907	0.0634338
RTF1	0.147248	-0.191105	0.83195
PARP6	0.849703	-0.047996	0.0707329
POP7	0.564473	0.0653092	0.248357
BNC2	0.294786	-0.525334	0.530493
FAM222B	0.679839	0.0862781	0.167594
HECTD4	0.137549	-0.357263	0.861542
SLC12A9-AS1	0.131283	-1.77252	0.881791
ARHGAP4	0.969043	-0.0359923	0.0136568
NEDD8-MDP1	0.420961	-0.18748	0.375758
LRPPRC	0.00171219	-0.285661	2.76645
MZF1-AS1	0.778068	0.212387	0.108983
C19orf70	0.831899	0.025046	0.0799293
SH3RF3-AS1	0.449755	-1.78655	0.347024
ATRX	0.0747139	-0.231419	1.1266
OGFR-AS1	0.89953	-0.683671	0.0459843
RALB	0.257675	0.250374	0.588928
PDGFB	0.866883	0.667251	0.0620397
TMEM218	0.396968	0.166812	0.401244
ACR	0.868377	-0.688645	0.0612918
CABP7	0.616139	-1.03888	0.210321
RPL3	3.10566e-16	-0.438673	15.5078
ZMAT5	0.419936	0.196389	0.376817
R3HCC1	0.692768	0.0782926	0.159412
FANK1	0.163016	2.64493	0.787771
SASS6	0.228628	-0.209495	0.640871
UCKL1-AS1	0.646877	1.37074	0.189178
CFAP65	0.950071	-0.0414364	0.022244
PRSS16	0.219078	-0.487708	0.659402
SRPRA	0.0612163	-0.248959	1.21313
DLX3	0.561968	-0.892499	0.250289
SPA17	0.361684	0.186291	0.441671
HUWE1	0.431362	-0.0871638	0.365158
FBXL19-AS1	0.243081	-0.975211	0.614248
HEXDC	0.535183	-0.183965	0.271498
TIAM1	0.625669	0.105051	0.203655
SNHG15	0.45709	-0.100277	0.339998
DTYMK	0.0908983	0.155778	1.04144
ATG4B	0.54673	0.104507	0.262227
ING5	0.789998	0.0507979	0.102374
TAP1	0.609501	-0.138094	0.215026
OCLN	0.357873	0.272259	0.446271
CFAP299	0.564252	-1.66448	0.248527
IFNA14	0.694821	-1.65009	0.158127
C11orf71	0.983551	-0.00677761	0.00720303
HARBI1	0.737763	-0.167442	0.132083
MPG	0.219248	-0.174235	0.659064
C4orf33	0.0281948	0.506629	1.54983
FRMD4A	0.131928	-0.593978	0.879662
HNRNPU	0.0477366	0.116761	1.32115
ANGEL1	0.61531	0.1423	0.210906
TUT1	0.917745	-0.0251642	0.0372778
ACP4	0.902201	0.667225	0.0446968
IP6K2	0.677836	-0.0596535	0.168875
MGAT5B	0.92765	0.0676447	0.0326157
FANCD2OS	0.889099	0.66725	0.0510499
PRRT3	0.758528	0.126437	0.120028
TOP1MT	0.222793	-0.241279	0.652099
IL17RE	0.456889	-1.35314	0.34019
CRELD1	0.000123765	-1.20535	3.9074
SRP68	0.456825	-0.0777647	0.34025
MRPL43	0.679725	0.0420005	0.167667
ST6GALNAC4	0.00373069	-0.861449	2.42821
KANTR	0.201543	-0.382225	0.695631
DNAJC27	0.773432	0.13972	0.111578
DAB2IP	0.448296	0.247496	0.348435
POMC	0.882799	0.218111	0.0541383
RAD51	0.232453	-1.32378	0.633666
DDN-AS1	0.566696	0.681269	0.24665
GALNT8	0.566378	-0.743212	0.246893
CCNB2	0.689981	0.0539266	0.161163
PLEKHF1	0.211689	-0.78986	0.674303
RNF111	0.691513	0.115959	0.1602
MAP2K6	0.730472	-0.0817533	0.136396
CLMN	0.342466	-0.366229	0.465383
PLCH2	0.687821	-1.65068	0.162525
SGCE	0.924665	-0.0254892	0.0340158
RBM48	0.664747	0.12936	0.177344
CASD1	0.247059	-0.381478	0.6072
FLYWCH2	0.510925	0.13302	0.291643
ZNF716	0.689129	1.60613	0.161699
SLFN5	0.522953	0.363256	0.281538
PAQR4	0.60688	-0.110572	0.216897
AGAP1	0.740762	0.078066	0.130321
SKA3	0.19058	0.287682	0.719922
PRAP1	0.761237	-1.64539	0.11848
MICU2	0.50279	0.104594	0.298614
SLITRK1	0.678349	0.950984	0.168547
GALNT11	0.529323	0.0956312	0.27628
TMEM151B	0.686868	-1.99757	0.163127
ANGPT1	0.678587	-1.99353	0.168395
TMED4	0.0263345	-0.240146	1.57947
SETD4	0.514636	0.181474	0.2885
DNAJB11	1.25129e-13	-0.975667	12.9026
MASP2	0.831257	-0.696537	0.0802648
RORA-AS1	0.765909	0.593342	0.115823
NEAT1	0.0432692	-0.344483	1.36382
PRPF6	0.405979	-0.127032	0.391497
CTSZ	0.91816	-0.0612825	0.0370819
ABCC11	0.68049	-0.897224	0.167178
TENT4B	0.493515	0.129425	0.3067
CTDSP2	0.680202	-0.0764531	0.167362
CKAP5	0.88321	0.0162845	0.0539363
HTR1D	0.419241	-1.29718	0.377536
SLITRK4	0.469645	2.23446	0.32823
OR10A2	0.976464	0.0854253	0.0103437
CHCHD7	0.0512927	0.270978	1.28994
ZNF33B	0.0985738	-0.33784	1.00624
FMC1	0.213483	-0.108127	0.670637
IQSEC2	0.66894	-0.171279	0.174613
MFSD14B	0.463396	0.0971821	0.334048
ZNF682	0.475306	-1.78992	0.323027
SRC	0.722945	-0.135272	0.140895
PGAP1	0.0281255	-0.504527	1.5509
GRASP	0.913943	0.0879834	0.0390808
ZNF772	0.156576	0.872167	0.805274
AP2B1	0.817557	0.0349871	0.0874822
LIAS	0.852001	0.056921	0.0695598
TMEM156	0.709797	-2.00814	0.148866
TAC1	0.778188	0.411635	0.108916
PDS5A	0.533962	-0.0804768	0.27249
ZYG11A	0.418514	0.274418	0.37829
ARRDC1-AS1	0.218265	0.379829	0.661017
ABCA4	0.902205	0.667197	0.0446948
FAN1	0.926388	0.0254973	0.0332071
EIF1AY	0.761237	-1.64539	0.11848
ZNF707	0.459326	-0.54569	0.337879
MAGEB6	0.773177	1.52935	0.111721
CDK5R1	0.868232	-0.0586193	0.0613643
TNFRSF1B	0.938075	0.216487	0.0277625
PLPP1	0.640251	-0.133809	0.19365
STX18-AS1	0.550818	0.499056	0.258992
PHGDH	0.0804145	-0.12666	1.09467
CSAG3	0.991027	0.00510592	0.00391473
IREB2	0.163873	-0.150453	0.785492
ZSWIM3	0.692267	0.221652	0.159726
ZNF750	0.549136	-1.55007	0.26032
RNF157	0.0525879	-0.424076	1.27911
ULK1	0.405433	-0.226645	0.39208
SECTM1	0.0833446	-1.40769	1.07912
CBX8	0.280889	-0.247702	0.551466
BANP	0.706811	-0.0907584	0.150697
PPP1CA	0.786068	-0.025243	0.10454
HCFC1	0.119456	0.164975	0.922792
TAS1R1	0.761235	-1.6454	0.118481
UQCRH	0.889742	-0.00701729	0.0507358
SLC39A4	0.675972	-0.0889892	0.170071
GPAM	0.251409	0.269196	0.599619
OBSCN-AS1	0.912669	-0.10824	0.0396869
MRPL55	0.0599859	0.170554	1.22195
KIAA1191	0.221759	0.123756	0.654119
CNOT6	0.513882	0.0873843	0.289137
PRKG1-AS1	0.555704	-1.79816	0.255157
TP63	0.846241	-1.04644	0.0725058
SLC25A22	0.0581554	0.409378	1.23541
DDX24	0.751335	0.0336762	0.124166
C21orf91	0.0726706	0.378792	1.13864
EPHA8	0.156583	-0.714396	0.805255
OSBPL3	0.967488	-0.0110257	0.0143545
TEX15	0.192554	-0.820348	0.715448
HCN4	0.286659	-1.48786	0.542634
S100P	0.375626	-1.59821	0.425244
NTS	0.704865	-0.433566	0.151894
APOBEC3D	0.764223	0.277577	0.11678
FARS2	0.236802	-0.344708	0.625615
CD81	0.0565576	0.155937	1.24751
ST6GAL2	0.688592	-1.4956	0.162038
DERA	0.711838	0.0673899	0.147619
KLHL12	0.171074	0.251747	0.766816
RGS4	0.786592	0.287067	0.104251
CTBS	0.0173728	-0.682283	1.76013
SSX2IP	0.861828	0.0267103	0.0645794
IGSF21	0.591276	-0.759997	0.22821
SHLD1	0.628777	0.2003	0.201503
JMJD1C	0.682016	0.121826	0.166205
EEF2K	0.292906	-0.26541	0.533272
CRYM	0.959687	0.0414138	0.0178706
MTMR8	0.855515	-0.216421	0.0677723
ZNF416	0.631582	0.354958	0.19957
MARCH3	0.395229	0.349231	0.403151
YPEL2	0.668599	-0.187974	0.174835
SYCP3	0.866327	-0.293314	0.0623182
NEDD1	0.644958	-0.0971044	0.190469
GAS2L3	0.333835	-0.300271	0.476469
CHMP1A	0.0518204	0.324371	1.2855
SUGP2	0.881852	0.0212776	0.0546045
CAMKMT	0.169353	0.467559	0.771206
UGGT2	0.0385629	-0.557273	1.41383
ZFP14	0.495312	-0.356802	0.305121
COL25A1	0.211026	-0.452186	0.675664
SOCS6	0.826088	-0.071237	0.0829738
LMNB2	0.109653	0.147534	0.959979
SOD3	0.902205	0.667197	0.0446948
CPNE1	0.936342	0.0109742	0.0285656
MVK	0.445124	0.144742	0.351519
SEPSECS	0.284107	0.484917	0.546518
B4GALT6	0.544768	0.115028	0.263788
GLB1L2	0.934889	0.0231267	0.0292401
LRRC49	0.803993	-0.0771439	0.0947477
PPP6R1	0.353432	-0.742287	0.451695
TUBGCP4	0.668699	0.0765235	0.17477
DGCR2	0.810554	0.0335304	0.0912182
CNTNAP4	0.709797	-2.00814	0.148866
C3orf67-AS1	0.902205	0.667197	0.0446948
FAM83F	0.587046	-1.66138	0.231328
HINFP	0.163517	-0.339843	0.786438
BSG	0.438716	-0.0622422	0.357817
PPL	0.0421261	-3.64457	1.37545
EEF2KMT	0.7562	0.0859626	0.121363
CYP4X1	0.722184	-0.569536	0.141352
ZNF75D	0.750268	0.117558	0.124784
ETFRF1	0.345741	0.201527	0.461249
UNC50	0.178898	-0.192821	0.747395
TIMMDC1	0.0262898	0.249124	1.58021
CRYBA1	0.678431	1.71372	0.168494
NUFIP2	0.508682	0.0775828	0.293553
KLHDC4	0.152272	-0.314008	0.81738
MCM4	0.967153	0.00299609	0.0145048
ARF3	0.35747	0.0970605	0.446761
PIK3R4	0.70357	0.0763689	0.152693
ZNF775	0.31894	0.322582	0.496291
PIWIL1	0.814943	0.667251	0.088873
ZNF777	0.390623	0.237691	0.408242
BLOC1S5-TXNDC5	0.0452784	-0.165003	1.34411
TRAPPC2	0.735424	0.0630191	0.133462
ZNF605	0.29247	-0.541371	0.533919
LRP10	0.672129	0.100794	0.172548
PEX11G	0.92431	0.0591473	0.0341826
PIGT	0.117463	0.218569	0.930098
SVIL	0.934568	0.0359235	0.0293891
C17orf102	0.902201	0.667225	0.0446968
FSIP1	0.882525	-0.243365	0.0542728
MATN4	0.391199	-1.43995	0.407602
SLC17A7	0.479803	-0.814158	0.318937
PELI1	0.744207	-0.0902694	0.128306
PCSK6-AS1	0.475784	-0.638194	0.32259
PHLDB1	0.451029	-0.251149	0.345795
ANKRD13A	0.744435	-0.066917	0.128173
EFCAB10	0.268886	-0.628062	0.570431
APBA1	0.794739	-0.250139	0.0997752
PAPOLB	0.827555	-0.203427	0.0822029
TCF7L1	0.69692	-0.169707	0.156817
TMEM245	0.716861	0.0531518	0.144565
PRUNE2	0.133006	-0.736067	0.87613
SMPD3	0.621755	-0.712581	0.206381
VTI1A	0.225593	0.298485	0.646674
COG4	0.28711	0.20759	0.541952
PRAG1	0.900999	-0.108381	0.0452758
DNLZ	0.335908	-0.263623	0.473779
GPATCH11	0.410964	-0.175262	0.386196
HSPB8	0.951051	-0.0482424	0.0217963
SFRP4	0.842247	-0.693974	0.0745604
NUP93	0.071229	0.232711	1.14734
CENPT	0.247378	0.286749	0.60664
TSNAXIP1	0.657569	-0.556179	0.182059
MEST	0.878472	0.24149	0.0562723
CNTN1	0.0978263	-0.506278	1.00954
MPI	0.219021	-0.146113	0.659514
ADORA2A-AS1	0.902203	0.667209	0.0446957
CTTNBP2NL	0.489968	0.169417	0.309832
SCARNA1	0.129347	2.45944	0.888243
ZNF550	0.0190479	-1.3126	1.72015
ZBED5-AS1	0.176908	0.535577	0.752253
PPP2R3C	0.927006	0.0159483	0.0329175
NKAIN3	0.761237	-1.64539	0.11848
KRTAP5-5	0.902205	0.667197	0.0446948
ZNF267	0.622935	0.134929	0.205558
RNPC3	0.0945858	-0.432924	1.02417
RACK1	4.12986e-06	-0.256526	5.38406
DISP3	0.739492	-1.64675	0.131066
HCG9	0.902205	0.667197	0.0446948
CDRT4	0.0876264	-0.615628	1.05737
GNB4	0.344637	0.14872	0.462639
SCN8A	0.66184	-0.39668	0.179247
CCDC183-AS1	0.731882	-0.889363	0.135559
ADAMTS10	0.895074	-0.221032	0.048141
ASB7	0.868095	-0.0462506	0.0614329
GTF2H2C	0.319218	0.207301	0.495913
ANKZF1	0.370636	-0.272295	0.431052
HDAC11	0.802892	0.114359	0.0953431
CWC22	0.38488	0.190036	0.414674
AZI2	0.971559	0.0049771	0.0125307
TGFBR2	0.484087	-0.242199	0.315077
CYP3A7	0.902202	0.667214	0.044696
SERF1B	0.805829	0.0352597	0.093757
SMN2	0.980128	0.00341834	0.00871729
AGMO	0.902205	0.667197	0.0446948
GRB10	0.562397	0.0967883	0.249957
ADCY10	0.514472	-1.79432	0.288639
LAMB3	0.640112	-1.97298	0.193744
ABHD11	0.179768	0.436577	0.745286
ALG9-IT1	0.761235	-1.6454	0.118481
ZNF436	0.939572	0.0299267	0.0270697
HNRNPR	0.0386082	0.150202	1.41332
MAEA	0.0207259	0.305975	1.68349
COBL	0.601032	-0.177675	0.221102
MGST1	0.00677086	0.365901	2.16936
STK33	0.784199	-0.109491	0.105574
PTGER3	0.530164	-1.46643	0.27559
FASTK	0.0269421	0.48703	1.56957
TMUB1	0.398434	-0.134557	0.399644
PHKA2	0.296419	0.317087	0.528094
C9orf85	0.366959	-0.207633	0.435382
TSKU	0.479761	-0.241907	0.318975
IGIP	0.643153	-0.207292	0.191686
PIK3AP1	0.742773	0.210551	0.129144
KIF24	0.742207	-0.14659	0.129475
DPF1	0.206784	0.451445	0.684484
ARAP1	0.468381	-0.180203	0.3294
FAT4	0.465103	-0.430337	0.33245
S100A4	0.116518	-1.50967	0.933608
PLEKHG4	0.0250941	-0.626486	1.60043
ZNF250	0.526757	-0.306071	0.27839
WDSUB1	0.318921	-0.275753	0.496317
ZNF79	0.418689	0.507113	0.378108
RAC2	0.312031	-1.68985	0.505802
LIF	0.638774	0.380916	0.194653
C22orf23	0.383406	-0.624423	0.416341
PLXDC2	0.53948	-0.230375	0.268025
URGCP-MRPS24	0.210468	-3.43607	0.676814
PPP1R13L	0.846172	-0.105053	0.0725411
ZNF25	0.804472	-0.144887	0.0944892
WWTR1-IT1	0.761235	-1.6454	0.118481
EIF3F	0.000190504	-0.321345	3.7201
GTSE1-DT	0.381795	1.60384	0.41817
NUP62CL	0.125405	-0.420406	0.901684
SFI1	0.347922	0.29192	0.458519
PANX1	0.414317	0.382086	0.382667
UBAC2	0.959061	-0.00781116	0.018154
CD2AP	0.516293	0.109727	0.287104
ZBTB14	0.595565	0.173524	0.225071
ARGLU1	0.688272	-0.0482259	0.16224
SPRN	0.388408	0.376914	0.410712
MYL4	0.902203	0.667213	0.0446959
HYLS1	0.423073	-0.239704	0.373584
PLAC4	0.902205	0.667197	0.0446948
NBEAL2	0.541179	0.246171	0.266659
CCDC12	0.069648	0.297197	1.15709
HDHD2	0.416263	-0.185963	0.380632
MTRNR2L5	0.821042	0.667252	0.0856344
CCDC57	0.873062	-0.0723169	0.0589549
LGSN	0.901754	0.667227	0.0449119
TRIM21	0.676406	0.231273	0.169793
CSNK1G2	0.791576	-0.0372662	0.101507
REXO4	0.788052	0.0479804	0.103445
SERPINA5	0.892503	0.667232	0.0493905
GTF3C5	0.424514	0.115486	0.372108
HOOK2	0.203209	-0.421274	0.692057
STX6	0.502269	0.155752	0.299064
GLUL	0.976018	-0.00227963	0.0105422
DHX9	0.00326645	0.220694	2.48592
RNASEL	0.3602	-0.406344	0.443456
PP7080	0.711673	-0.0763721	0.147719
FLVCR1	0.688676	0.0635462	0.161985
PTPRG-AS1	0.955601	-0.0213365	0.0197236
A1BG-AS1	0.375553	0.410484	0.425329
GPR151	0.902202	0.667214	0.044696
ZNF483	0.883961	-0.25321	0.0535669
CACYBP	3.36377e-06	0.319001	5.47317
AQR	0.82234	0.0405526	0.0849485
HOXA11-AS	0.202591	0.295439	0.69338
PCDHB16	0.902201	0.667226	0.0446968
YWHAH	0.102665	0.145312	0.988578
KCNN2	0.350382	1.27059	0.455458
AJM1	0.651083	-0.847964	0.186363
SH3PXD2B	0.136579	0.452893	0.864615
SLC25A25-AS1	0.838062	0.101252	0.0767238
C11orf94	0.761238	-1.64538	0.11848
BNC2-AS1	0.140879	-2.78757	0.851153
NENF	0.424085	-0.0681769	0.372547
CHFR	0.523982	0.179106	0.280684
ST8SIA4	0.529226	0.462831	0.276359
NSL1	0.0433672	0.244436	1.36284
NCBP2L	0.73862	1.53118	0.131579
ITPKC	0.938639	0.0368899	0.0275016
RBMS2	0.417483	-0.247219	0.379361
ATP5MG	0.00653109	0.156139	2.18501
MCF2L-AS1	0.659577	-0.280424	0.180735
SOX30	0.888954	0.667248	0.0511209
FGF18	0.377925	1.29449	0.422595
RAB11B-AS1	0.862644	-0.0716714	0.0641685
DOLK	0.272933	-0.247313	0.563943
ALOX5	0.382751	-1.35991	0.417084
SFXN2	0.557836	0.118089	0.253494
TBC1D3F	0.587356	0.872278	0.231099
POU1F1	0.89953	-0.68367	0.0459842
VSIG10	0.602033	-0.177769	0.22038
GAN	0.275267	0.223833	0.560247
UPK2	0.6789	-1.99368	0.168194
GNL2	0.882579	-0.0192867	0.0542465
MEI4	0.907392	-0.240782	0.0422049
CDCA8	0.13966	0.212585	0.854927
NPNT	0.133546	-0.815311	0.874369
AGO4	0.571402	-0.18294	0.243058
DUSP3	0.224141	-0.140061	0.649478
ZFPM2-AS1	0.8534	0.667253	0.0688471
GALM	0.321955	0.196777	0.492204
VASH1	0.583726	-0.143053	0.233791
ING3	0.742943	-0.0563378	0.129045
MPP6	0.0712094	-0.293361	1.14746
ATP6V0A4	0.902205	0.667197	0.0446948
GSDME	0.240634	0.610456	0.618643
AHCY	0.0928225	-0.130416	1.03235
RIN2	0.780574	-0.180252	0.107586
POLR3F	0.171996	0.332776	0.764482
YLPM1	0.601158	0.0801288	0.221011
PPP1R37	0.389728	-0.418304	0.409238
DCAF4	0.879016	0.0441372	0.056003
LPAR6	0.876824	0.667238	0.0570875
ITPRIP	0.692888	-0.183758	0.159337
PPRC1	0.594515	-0.0821517	0.225837
PDCD11	0.967253	0.00733841	0.01446
CNNM2	0.8365	-0.0677297	0.0775341
ADAM12	0.199036	2.68161	0.701068
HNRNPA1L2	0.187023	-0.206878	0.728106
LHX8	0.87837	-0.0994895	0.0563224
SNX7	0.357535	0.162986	0.446681
LRRIQ3	0.856765	-0.0698948	0.0671381
TYW3	0.00408444	0.424496	2.38887
ZDHHC9	0.402357	-0.140155	0.395388
ZBED6CL	0.414441	0.252666	0.382537
SHC4	0.55425	1.47154	0.256295
TCEAL3	0.8595	0.0824458	0.0657542
PRSS37	0.491067	-3.64192	0.308859
PBX1	0.429541	0.117743	0.366996
NDUFA4L2	0.619499	-0.608444	0.207959
MAMDC2	0.726337	0.836882	0.138862
MROH8	0.206625	-1.35096	0.684817
TPST1	0.472439	0.241269	0.325654
TOR1AIP2	0.0450724	0.211832	1.34609
RCOR1	0.786853	0.0594548	0.104106
PLD5	0.389208	-1.05976	0.409819
PRPH2	0.650095	-2.43094	0.187023
TSNAX-DISC1	0.273934	0.864824	0.562355
PTPRK	0.136466	-0.365286	0.864976
GSTCD	0.503542	-0.132947	0.297965
INTS12	0.778996	0.055862	0.108465
ZC3H3	0.418748	0.26809	0.378047
STRN3	0.326363	0.144916	0.486299
ZNF239	0.0897801	0.61301	1.04682
ATP6V1G2-DDX39B	0.0084845	0.210986	2.07137
CAGE1	0.89953	-0.68367	0.0459842
AQP12A	0.761238	-1.64538	0.11848
PRIMPOL	0.280158	0.335529	0.552597
ERAP1	0.163477	-0.613655	0.786542
SERINC5	0.486236	0.260926	0.313153
ERAP2	0.0861107	1.14671	1.06494
CMYA5	0.538295	0.859428	0.26898
RANGAP1	6.159e-05	0.451693	4.21049
ZC3H7B	0.844238	0.0304113	0.073535
GDAP1	0.47427	-0.192511	0.323975
RAB2A	0.13442	0.177969	0.871535
GATAD1	0.402987	-0.141082	0.394709
MINDY4	0.304004	0.684178	0.517121
HS3ST3B1	0.618624	0.103211	0.208573
SLC25A35	0.407025	0.406818	0.390379
SKA2	0.620775	0.0473631	0.207066
PLCB1	0.0922918	0.433419	1.03484
NPIPA2	0.256406	-0.559935	0.591072
CACNA2D2	0.151705	-0.750276	0.819
MPV17L2	0.429876	0.143421	0.366657
NOVA2	0.743291	0.429249	0.128841
AES	0.00434819	-0.421823	2.36169
PTOV1	0.913439	-0.0112248	0.0393204
KIF1B	0.52977	0.101929	0.275912
TXNDC5	0.761238	-1.64538	0.11848
TXNDC12-AS1	0.650557	-1.97885	0.186715
ANKMY2	0.667599	0.119667	0.175484
MED7	0.755983	-0.0742476	0.121488
ACTR3C	0.31638	-1.00037	0.499791
RPS20	0.00060178	-0.186766	3.22056
CMTR2	0.9284	0.0325205	0.0322649
OXTR	0.887975	-0.194312	0.0515991
TAOK1	0.826632	-0.0306879	0.0826876
CCDC163	0.0123636	-1.15737	1.90785
C4orf36	0.283933	1.90706	0.546784
IPO4	0.565042	0.0698495	0.24792
MAP4K5	0.664183	0.085529	0.177712
CCDC74B	0.10983	0.580059	0.95928
LTC4S	0.98083	-0.0466217	0.00840632
ATRIP	0.590808	0.140773	0.228554
PSMD5	0.369623	-1.23884	0.432241
L3MBTL1	0.671608	0.265451	0.172884
TMEM101	0.0136496	-0.399317	1.86488
XK	0.68033	-0.180847	0.16728
CHAC1	0.000469747	-1.28845	3.32814
WWP1	0.73525	0.0665746	0.133565
SPARC	0.893394	0.0274077	0.0489568
CLDN5	0.885854	0.667246	0.0526378
EIF3C	0.761494	-0.0259673	0.118334
ZCCHC4	0.492587	-0.257982	0.307517
TGFA	0.923383	-0.135506	0.0346179
CAMK2N1	0.680286	-0.100411	0.167308
TCP11L2	0.147539	-2.78877	0.831093
TMCO4	0.664451	-0.245857	0.177537
COL5A1-AS1	0.902205	0.667197	0.0446948
SERINC2	0.000875384	1.09591	3.0578
SYNGAP1	0.478246	-0.216481	0.320348
HRH3	0.902203	0.667208	0.0446956
LYN	0.868044	0.036623	0.0614582
LMLN2	0.709797	-2.00814	0.148866
LRRC43	0.93975	0.223928	0.0269874
SLTM	0.861473	0.0284836	0.0647582
CTDSPL2	0.825009	0.0422633	0.0835412
TOMM40	0.000644526	0.361317	3.19076
NECTIN2	0.480576	-0.139098	0.318238
RNF216	0.938498	0.0145302	0.0275668
SPPL3	0.656507	-0.0723465	0.18276
APOC1	1.05656e-07	-0.791308	6.9761
GAREM2	0.724153	-0.146745	0.14017
U2SURP	0.47595	0.061745	0.322439
TTC8	0.594802	0.13127	0.225627
MFSD12	0.259191	0.234519	0.586381
DDX55	0.12653	-0.222004	0.897808
MED17	0.904551	-0.0480238	0.0435669
PLEKHM3	0.630178	0.187947	0.200537
PRNP	0.0603028	-0.317675	1.21966
RNASEH1	0.618454	0.0983257	0.208692
FTCD-AS1	0.902205	0.667197	0.0446948
RPS7	0.00386027	-0.162926	2.41338
PSKH1	0.702312	0.0842391	0.15347
MRM3	0.0843878	0.304892	1.07372
PARP3	0.720067	-0.171291	0.142627
FBXW8	0.753451	0.146532	0.122945
RBM17	0.792977	0.0265711	0.10074
SCARNA14	0.790679	0.236722	0.102
LRRC56	0.540245	1.0849	0.267409
ZBTB11-AS1	0.582462	0.190332	0.234732
BSDC1	0.260782	-0.143388	0.583723
TMEM234	0.746509	0.096964	0.126965
STMP1	0.0289674	0.208502	1.53809
CCDC28B	0.641146	0.098915	0.193043
IQCC	0.868276	0.0513897	0.0613423
NEURL4	0.327334	1.77756	0.485008
AIFM2	0.569337	0.286905	0.24463
ST8SIA6-AS1	0.473457	-3.04093	0.32472
MRPL48	0.0754672	0.269451	1.12224
RAB6A	0.918791	0.0159726	0.0367833
CYP46A1	0.8671	0.667249	0.0619306
LCN15	0.829518	-0.241856	0.0811739
PDE4A	0.177671	-0.660382	0.750382
ASB8	0.328198	-0.160834	0.483864
ODF3B	0.902205	0.667197	0.0446948
TMSB15B-AS1	0.694681	-0.787619	0.158215
RPS6KB2	0.724764	-0.0594345	0.139803
MRAP2	0.328579	0.715508	0.48336
SF3B6	0.0122925	0.176055	1.91036
CETN2	0.906261	-0.0140014	0.0427466
NINJ1	0.764837	0.0770396	0.116431
BARX1	0.319052	-0.437604	0.496138
CYP26B1	0.379713	-0.542474	0.420544
OR2A1	0.709797	-2.00814	0.148866
MRPL35	0.00107347	0.44558	2.96921
CCNL2	0.172147	-0.203757	0.7641
AMY1A	0.82066	-0.699194	0.0858366
AGTRAP	0.327823	0.15316	0.48436
CD163L1	0.902201	0.667225	0.0446968
FAM200B	0.470796	-0.106091	0.327167
SRRM3	0.183968	-1.03312	0.735259
THOP1	0.636973	0.0511117	0.195879
ZNF556	0.902201	0.667226	0.0446968
ZNF554	0.300782	-0.501295	0.521748
RAB33B	0.72125	-0.0970933	0.141914
C15orf62	0.995754	0.0119128	0.00184775
PNP	0.0963701	-0.201938	1.01606
NEDD4	0.704808	0.139351	0.151929
CDH19	0.731854	1.84422	0.135576
PDCD2	0.040409	0.181183	1.39352
WDR7	0.64898	0.153391	0.187769
DNAH7	0.982854	0.0334288	0.00751093
ADIRF-AS1	0.902205	0.667197	0.0446948
SELENOI	0.777628	0.0456251	0.109228
FAM78B	0.881274	-0.220149	0.0548892
RCBTB1	0.817441	-0.0475549	0.0875437
PHF11	0.387488	0.488946	0.411742
MED4	0.310993	0.126191	0.507249
LRCH1	0.119136	-0.550923	0.923956
SUCLA2	0.086081	0.220952	1.06509
NBEA	0.883764	0.0498656	0.0536635
FAHD2B	0.261517	-0.325988	0.582501
TC2N	0.00486002	-0.815749	2.31336
DCX	0.864153	-0.689438	0.0634092
CD82	0.203052	0.778057	0.692393
SERTAD4-AS1	0.327025	-0.46061	0.485419
PELI3	0.341057	-0.363123	0.467173
TATDN3	0.988864	0.00270603	0.00486337
HES7	0.995081	0.00808413	0.0021415
MAN2A1	0.485734	0.16203	0.313601
ANKRD10	0.790981	0.0525679	0.101834
SREBF1	0.702539	-0.0957408	0.153329
MTRNR2L12	0.0519044	-0.426003	1.2848
KIF11	0.0394164	0.227409	1.40432
SAV1	0.559711	-0.0900596	0.252036
AMN1	0.254763	0.435063	0.593863
BICD1	0.93166	-0.035013	0.0307425
IGF1R	0.537638	0.118476	0.26951
TMEM43	0.547211	0.102909	0.261845
MTSS1	0.102648	1.01772	0.988652
KIAA0232	0.426287	0.207684	0.370298
OSR1	0.648708	-0.819239	0.187951
MAMLD1	0.932837	-0.0600797	0.0301944
ST6GALNAC5	0.672399	-0.556762	0.172373
ZNF346	0.879186	-0.0352522	0.0559194
UNC5A	0.510802	-0.837	0.291747
ARL13B	0.976727	-0.00728049	0.010227
TIGD7	0.159305	1.21829	0.79777
PDPK1	0.740772	0.0646568	0.130315
TM7SF3	0.978161	-0.00431951	0.00958959
CRADD	0.576951	0.178137	0.238861
DEF8	0.0610986	0.220238	1.21397
MDK	0.000626174	-0.33237	3.2033
AMBRA1	0.399423	-0.213203	0.398567
ST8SIA1	0.459542	2.05412	0.337675
CMAS	0.844117	0.0224708	0.0735973
HCFC2	0.405349	0.275623	0.39217
PRKAB1	0.940279	0.0175441	0.0267434
XYLT1	0.012504	-2.43272	1.90295
PSMD6-AS2	0.890994	-0.297327	0.0501251
HS3ST6	0.653179	-1.65386	0.184968
RERE	0.828096	0.0456769	0.0819193
LHPP	0.217024	-0.335112	0.663492
TAX1BP1	0.284834	-0.110112	0.545408
ADAMTSL3	0.578758	1.25426	0.237503
DPYSL2	0.978967	0.00553147	0.00923173
STEAP1B	0.762099	0.197805	0.117989
MPRIP-AS1	0.678371	-0.517329	0.168532
ITGA1	0.417134	0.388294	0.379724
FOXO1	0.371795	0.215003	0.429696
RAB6C-AS1	0.20372	-1.4703	0.690966
FBXL5	0.775981	-0.0583797	0.110149
ARHGEF17	0.871773	-0.175225	0.0595965
KRTAP19-1	0.689585	0.240279	0.161412
GUCD1	0.134411	0.216939	0.871567
VSNL1	0.205349	2.84304	0.687507
KATNBL1	0.443422	0.165038	0.353183
EMC7	0.413948	0.0955517	0.383054
SMG9	0.587	-0.128885	0.231362
UBE2D2	0.225545	0.116557	0.646767
SLC30A9	0.548023	0.0690845	0.261201
DIAPH1	0.194519	0.235115	0.711038
IER5	0.0880511	-0.242379	1.05527
COPS2	0.291301	-0.130128	0.535659
GABRB3	0.663519	-0.115147	0.178146
ANKHD1	0.10125	0.553046	0.994603
OLAH	0.870116	0.458981	0.0604229
RPP38	0.100719	0.306989	0.996887
NMT2	0.870948	0.0302393	0.0600076
ANKRD20A1	0.890573	0.262554	0.0503303
TMEM45A	0.173968	-0.360377	0.75953
ZNF678	0.277662	-0.213838	0.556484
RYK	0.815322	0.04216	0.088671
TOPBP1	0.107161	0.234539	0.969962
SNRK	0.166165	-0.416285	0.779461
LDOC1	0.206207	0.202618	0.685698
EXT1	0.833296	0.0426504	0.0792008
MAPK12	0.9284	-0.0186503	0.0322649
SHMT2	0.00176815	-0.296115	2.75248
RNFT2	0.848642	-0.0510681	0.0712757
QRFPR	0.833479	0.17267	0.0791053
POFUT2	0.526338	-0.150881	0.278736
FAM157C	0.433112	1.99693	0.3634
PDZD7	0.35406	-0.632237	0.450924
MAPT	0.936254	-0.0220381	0.0286062
YAF2	0.267308	0.233329	0.572988
SLAIN1	0.0362417	0.28401	1.44079
ISPD	0.127564	0.890857	0.894273
DIAPH3	0.150806	-0.246924	0.821581
NPIPA7	0.168201	0.61467	0.77417
MSL3	0.863772	0.0389415	0.0636007
CLNS1A	0.969053	-0.00320512	0.0136524
TRIB3	3.33015e-06	-1.06019	5.47754
PTPA	0.378211	-0.146294	0.422266
TRAPPC8	0.0262329	0.342204	1.58115
CMC1	0.905622	-0.0151509	0.043053
CCDC43	0.238846	0.143727	0.621881
AKAP9	0.795605	-0.0494076	0.0993024
GPM6A	0.124754	-0.477768	0.903946
HECA	0.802696	0.0537693	0.0954488
FAM237B	0.678459	-1.07861	0.168476
IFRD1	0.0277966	-0.293791	1.55601
CBX6	0.0112889	0.266718	1.94735
TRMT44	0.996041	0.00182057	0.00172281
ISL2	0.908799	-0.0265453	0.041532
PKD2L1	0.761237	-1.64539	0.11848
MOCS2	0.0432091	0.270767	1.36442
ITGA2	0.827391	-0.0930471	0.0822894
AKR1C4	0.709797	-2.00814	0.148866
COPS8	0.00241377	0.318204	2.6173
BARD1	0.0486962	0.3638	1.3125
FSTL5	0.855976	0.66725	0.0675382
DHRS7	0.756232	-0.0417369	0.121345
PPM1A	0.552537	0.108372	0.257638
MSX2	0.013922	0.547152	1.8563
SAP30BP	0.373047	0.145359	0.428236
VPS11	0.962197	0.0115918	0.0167359
INMT-MINDY4	0.902205	0.667197	0.0446948
IL17C	0.902205	0.667197	0.0446948
WDR92	0.261979	0.291919	0.581733
ZNF487	0.257988	-0.658555	0.588401
DDR1	0.0416722	-0.77848	1.38015
FLJ45513	0.703453	-0.80686	0.152765
RPP25	0.971582	-0.00607679	0.0125205
GRINA	0.432418	-0.0925798	0.364096
MAT1A	0.440493	1.9946	0.356061
ARIH2	0.20033	-0.148233	0.698254
PLPPR3	0.410528	-1.33972	0.386657
WRNIP1	0.310333	0.140496	0.508173
MRS2	0.861626	0.0249153	0.0646813
DNAJC19	0.0826065	0.219528	1.08299
PARP2	0.522513	0.107683	0.281903
GSTP1	0.106821	0.0969986	0.971343
SMIM11A	0.219544	0.226941	0.658478
FDX2	0.922842	-0.0182066	0.0348727
EXOC3L1	0.934138	0.168075	0.029589
RNA5S14	0.718771	-0.83435	0.14341
POU2F2	0.0377891	-2.859	1.42263
CLHC1	0.341948	0.544315	0.46604
NEUROD1	0.218599	2.09901	0.660352
DLG5	0.437148	-0.141526	0.359372
DUSP19	0.811932	-0.0899155	0.0904805
FRZB	0.986248	-0.0735401	0.00601399
NCK1	0.402925	-0.164807	0.394776
ITGAL	0.902203	0.667213	0.0446959
TMED6	0.292046	1.84423	0.534549
FMOD	0.761235	-1.6454	0.118481
MYCNOS	0.902205	0.667197	0.0446948
ZBED9	0.306497	0.42526	0.513573
TRMT1L	0.155342	0.256506	0.808711
IFI6	0.406396	-0.16964	0.391051
AHDC1	0.433459	-0.303479	0.363052
CASC19	0.976204	-0.0727645	0.0104592
LPP	0.222975	-0.278507	0.651743
PCOLCE	0.484073	-0.31834	0.315089
DAXX	0.33149	0.142719	0.479529
RIMBP3C	0.133378	2.41773	0.874915
STK17B	0.39897	0.19207	0.399059
CDC123	0.0626206	0.164835	1.20328
PHC3	0.00055613	1.01023	3.25482
AUTS2	0.235196	-0.145156	0.62857
PIAS1	0.582233	0.0879833	0.234903
RALBP1	0.145566	0.258946	0.83694
MIS18A	0.66087	0.0434313	0.179884
PYCR3	0.857273	0.0445454	0.066881
TSTA3	0.608666	-0.113767	0.215621
NUDT10	0.760541	0.0793019	0.118877
ZNF300	0.39029	0.407877	0.408612
TNIP1	0.625515	0.0992267	0.203762
G3BP1	0.0131335	0.217381	1.88162
SUMF2	0.0525442	-0.23903	1.27947
ZNF628	0.473751	-0.318055	0.32445
MMP2	0.0748363	-1.05356	1.12589
EEF1D	0.00116287	-0.234693	2.93447
STRADB	0.67463	0.0784681	0.170934
PDZK1	0.755147	-0.600443	0.121968
YTHDC1	0.942567	0.0104078	0.0256876
A4GALT	0.772894	-0.244823	0.11188
ATF4	0.00255408	-0.17797	2.59277
SLCO3A1	0.0521418	3.49002	1.28281
LANCL2	0.178566	0.297336	0.748202
DDC	0.742425	-0.72495	0.129348
FIGNL1	0.43306	0.141645	0.363452
SEC61G	0.000474322	-0.230565	3.32393
PACERR	0.842307	0.733448	0.0745294
CBFA2T2	0.688958	0.122065	0.161808
NUCKS1	0.868139	-0.00937569	0.0614106
ABHD1	0.276575	-0.795487	0.558187
MEIS1	0.327782	-0.270646	0.484415
MAP2K4	0.755447	-0.0547172	0.121796
EIF3H	0.000563507	-0.235403	3.2491
UTP23	0.0802311	0.333824	1.09566
SLC38A3	0.0559051	-1.3514	1.25255
OLMALINC	0.235212	-0.28354	0.62854
MSANTD4	0.149305	-0.325766	0.825925
TNPO2	0.449363	0.117635	0.347402
ZNF721	0.531853	0.127502	0.274208
CCNI	0.0550229	-0.20339	1.25946
TOMM7	0.0135344	-0.137166	1.86856
EFR3A	0.79991	-0.0576686	0.0969588
ENOPH1	0.898444	0.0167236	0.046509
C2orf40	0.902205	0.667197	0.0446948
LIN52	0.448175	0.150806	0.348552
E2F5	0.706264	0.0633586	0.151033
ABCB8	0.653543	0.0916232	0.184726
C2orf42	0.105764	0.683182	0.975661
TRAK2	0.687792	-0.117383	0.162543
MAPK4	0.81206	-0.230635	0.0904119
GCC2-AS1	0.722755	1.43747	0.141009
ATF5	0.12241	0.552208	0.912184
MRPL57	0.764485	0.0301681	0.116631
EIF4B	6.28238e-05	-0.318809	4.20188
BMP5	0.889855	0.667243	0.0506808
NRXN3	0.601759	0.141642	0.220578
PPP1CB	0.652027	0.040917	0.185735
ADAT3	0.603457	-2.77022	0.219353
ABCD1	0.598889	0.34506	0.222654
SLC25A38	0.428159	0.158395	0.368395
ESS2	0.509485	-0.123252	0.292869
CSRNP1	0.9692	-0.0194367	0.0135865
CRYBB3	0.387508	2.74133	0.411719
GRID2	0.0495813	-3.49339	1.30468
TRIM59	0.181822	0.242386	0.740353
IQCH-AS1	0.37923	0.730736	0.421097
CRLS1	0.37567	0.110068	0.425193
ZNF394	0.857685	0.0599502	0.0666724
UBAP2L	0.00320879	0.284961	2.49366
PARD6A	0.838955	0.122924	0.0762613
ZNF821	0.91006	0.0478731	0.0409298
STRAP	0.00774821	0.192924	2.1108
SLCO1C1	0.821517	-0.69898	0.0853837
AEBP2	0.836813	-0.0354155	0.0773714
DDX19A	0.787868	0.0385241	0.103547
SLC9A6	0.847989	-0.0468252	0.0716099
PRDX1	8.24956e-14	0.469298	13.0836
DDX58	0.497078	-0.570013	0.303576
DDX19B	0.235083	0.257691	0.628779
CMTM7	0.879404	0.0298475	0.0558116
FBXL2	0.00384573	-0.9821	2.41502
EEF1AKMT3	0.0625762	-0.786074	1.20359
NAT2	0.58497	2.91613	0.232867
TTC34	0.324246	-1.48173	0.489126
SYTL4	0.243884	-0.537773	0.612816
ATAD3C	0.516824	0.913754	0.286657
CTSK	0.448553	-0.818143	0.348186
MCL1	0.907638	-0.0118025	0.0420873
ADAMTSL4	0.49179	-1.79188	0.30822
EHD2	0.668444	0.331812	0.174935
RNGTT	0.931787	0.0195813	0.0306831
HOTAIR	0.233145	-0.443403	0.632374
ROCR	0.933614	-0.31319	0.0298325
C2-AS1	0.761238	-1.64538	0.11848
ATG101	0.576629	-0.153151	0.239104
CLIC4	0.603265	0.059607	0.219492
CCPG1	0.0228806	-0.573763	1.64053
SLC16A4	0.629274	-0.357836	0.20116
CRYM-AS1	0.0205333	-4.11555	1.68754
SLC9A3R2	0.445604	-0.154926	0.351051
LDLRAD4	0.982604	0.0146596	0.00762163
KCTD19	0.697676	0.333788	0.156346
ZNF573	0.862591	-0.0653485	0.0641949
CLDN4	0.254673	-2.29985	0.594017
UGT3A2	0.590126	0.320718	0.229055
FAM84B	1.66485e-06	-0.724799	5.77863
HOXC-AS1	0.0322663	-1.13089	1.49125
PHF3	0.177699	-0.25377	0.750315
CEP70	0.492482	-0.173215	0.307609
ICA1L	0.651598	0.159164	0.18602
PPM1L	0.876285	0.0486829	0.0573547
NCAPH2	0.400413	-0.14332	0.397492
TOMM34	0.28403	0.153905	0.546636
BMP3	0.596399	1.07074	0.224463
PRDM8	0.876625	0.117768	0.057186
GRIK4	0.974132	0.0480275	0.0113822
MITF	0.822446	0.0674976	0.0848927
ENTPD5	0.635104	-0.135202	0.197155
PLCD1	0.73455	0.338945	0.133979
AASS	0.786403	0.13561	0.104355
APOBEC3C	0.00167851	-0.496432	2.77507
LYPLA2	0.143029	0.295766	0.844575
ELOA	0.0124771	0.38459	1.90389
HIST2H2BE	0.0613085	-0.852882	1.21248
RALYL	0.9022	0.66723	0.0446971
ZBTB40	0.826546	0.0591748	0.0827328
AMER1	0.482862	0.255936	0.316177
ORC5	0.675902	0.0805111	0.170116
DNAAF5	0.229495	0.16801	0.639226
SLC25A45	0.775381	-0.191609	0.110485
HCAR2	0.902205	0.667197	0.0446948
RPL29	7.60929e-05	-0.273322	4.11866
HSPA8	0.229029	0.158423	0.64011
CENPJ	0.370409	-0.243772	0.431318
PARD3-AS1	0.524933	1.29261	0.279896
PPP1R9A	0.677966	0.286985	0.168792
COG6	0.190819	-0.267523	0.719378
PLEKHB2	0.451626	0.102217	0.345221
BIRC6	0.0719981	-0.302519	1.14268
NOL10	0.916732	0.0164058	0.0377577
TSR2	0.00409846	0.462593	2.38738
CPA5	0.902203	0.667213	0.0446959
PRDM13	0.188383	-0.512877	0.724957
CTBP1	0.537725	-0.0599413	0.26944
FBXL4	0.356158	-0.217779	0.448357
CCNC	0.176339	0.151566	0.753652
TPTEP2-CSNK1E	0.890982	-0.0171967	0.0501312
FBP1	0.721682	-0.868178	0.141654
MORF4L1	0.00010498	0.262969	3.97889
TNIK	0.715383	0.0798042	0.145462
ZMYND8	0.566692	-0.116167	0.246653
FAM114A2	0.758547	-0.066736	0.120018
FAM167A	0.448439	-0.858259	0.348297
SGK2	0.893231	-0.684555	0.0490363
PCMT1	0.879631	0.0126456	0.0556992
DAB1	0.627271	0.590005	0.202545
CCDC170	0.951747	-0.0574855	0.0214786
GRAMD2A	0.709797	-2.00814	0.148866
RHOT1	0.802698	-0.0486631	0.0954481
ZNF74	0.872843	0.0321849	0.0590641
PPIL6	0.426819	-0.618002	0.369756
CHRD	0.930539	0.0927274	0.0312656
THPO	0.507509	1.54341	0.294556
P3H2	0.891124	0.172156	0.0500618
PURPL	0.261766	-0.580623	0.582086
PPP1R14D	0.589199	1.46256	0.229738
LSM14A	0.433039	0.0854373	0.363473
CPLANE1	0.91762	-0.0365223	0.0373371
FAR1	0.727805	0.0447472	0.137985
HMBS	0.269067	0.161943	0.570139
KMT5A	0.189446	0.203119	0.722515
OTUD6B-AS1	0.327249	0.189128	0.485122
DLX6	0.691803	0.160688	0.160018
PCDHGA6	0.749095	0.648922	0.125463
SLC43A3	0.902202	0.667219	0.0446963
NOL8	0.0858858	0.282438	1.06608
IRAK4	0.999767	-9.46972e-05	0.000101041
CCDC151	0.801655	0.244357	0.0960126
KCNG3	0.556916	-0.322745	0.254211
TIMM10	0.481353	0.0793747	0.317536
CHPF	0.145212	-0.308231	0.837998
ACSL3	0.799475	-0.0270716	0.0971952
C1orf195	0.902205	0.667197	0.0446948
BAG6	0.608815	0.0500331	0.215514
MRPS23	0.00107883	0.361324	2.96705
LUC7L	0.992423	0.0014976	0.00330297
PRRC2A	0.388206	0.137459	0.410938
HSD11B1L	0.409738	-0.32908	0.387494
TERT	0.833995	-0.20019	0.0788366
CHML	0.275334	0.18447	0.56014
AMBN	0.834571	-0.185225	0.0785367
RPL39L	0.15451	-0.214908	0.811042
IKZF5	0.176579	-0.227387	0.753062
SYNPO2	0.449418	1.53416	0.347349
RNF223	0.761235	-1.6454	0.118481
XIAP-AS1	0.751028	-1.646	0.124344
ASXL3	0.614353	-0.247737	0.211582
SLC25A52	0.378417	1.57668	0.422029
MEP1B	0.902205	0.667197	0.0446948
GGTLC3	0.777115	1.52911	0.109515
ACTL6A	0.842081	0.031956	0.0746463
SYNGAP1-AS1	0.34843	1.98727	0.457884
AFG3L2	0.590529	-0.0841832	0.228759
PPIE	0.497936	0.11251	0.302826
SMAP2	0.16857	0.274075	0.773221
SS18	0.372204	-0.116447	0.42922
WHRN	0.661864	0.214711	0.179231
ZNF529-AS1	0.881647	-0.159638	0.0547052
ZNF219	0.279063	-0.439704	0.554297
CASP7	0.411702	0.155696	0.385417
PPP1R36	0.586829	1.6898	0.231488
ARHGEF40	0.297807	-0.465189	0.526065
NSMF	0.553313	0.136472	0.257029
CEBPD	0.393635	-0.391066	0.404906
KDM4B	0.826228	0.0512738	0.0829
TICAM1	0.288724	-0.803247	0.539517
CCDC32	0.489435	0.207276	0.310305
ATP2B1	0.394564	-0.122751	0.403883
UHRF1	0.838263	0.0242121	0.0766197
ORAI1	0.498047	-0.20023	0.30273
HOOK3	0.812087	-0.0362655	0.0903975
DHRS11	0.63203	0.127321	0.199262
LHX1	0.770298	-0.169685	0.113341
DGLUCY	0.377697	-0.376579	0.422857
RPH3A	0.709797	-2.00814	0.148866
ARHGAP11A	0.0283127	0.386183	1.54802
CHAMP1	0.2093	0.221902	0.67923
INPP5F	0.920804	-0.0305859	0.035833
GRM3	0.545796	0.887567	0.262969
CHPF2	0.106157	-0.334059	0.974051
APPL1	0.588658	-0.0779021	0.230137
MUM1L1	0.441988	0.581493	0.35459
BACE1-AS	0.936368	0.0298632	0.0285534
PRR29	0.76124	-1.64537	0.118479
C4B	0.590063	-1.94178	0.229101
RBPMS-AS1	0.834371	-0.695786	0.0786408
HOXD8	0.256802	0.379671	0.590402
CREG2	0.757748	0.989153	0.120475
SYF2	0.00116687	-0.477916	2.93298
RSRP1	0.0234144	-0.44893	1.63052
OSBP	0.614137	-0.0817604	0.211735
UBB	0.126526	0.078533	0.897822
CDK1	0.060317	0.162058	1.21956
STX8	0.845569	-0.0431077	0.0728509
DTX4	0.761239	-1.64537	0.118479
ATG2A	0.161333	0.436674	0.792278
EHD1	0.481709	0.145513	0.317216
ANO3	0.902203	0.667208	0.0446956
ZNF488	0.537787	0.351107	0.269389
OGDHL	0.848212	0.0615056	0.0714953
CCNT1	0.620895	-0.0826571	0.206982
PUS7L	0.0618727	0.371058	1.2085
ATG3	0.646219	0.0542881	0.18962
LBR	0.84809	0.0165372	0.0715579
RABL3	0.343681	0.206531	0.463845
ADPRH	0.624722	-0.953661	0.204313
EPHX1	0.125733	0.306219	0.900552
ZNF638	0.270055	0.192589	0.568548
TARBP2	0.229704	0.227257	0.638832
WNT8B	0.709799	-2.00812	0.148865
FAM186B	0.621284	-1.32319	0.20671
RDH5	0.240955	-2.74778	0.618065
PGM1	0.0739741	-0.2048	1.13092
HUNK	0.140108	0.538487	0.853537
AGAP2	0.320304	-0.831299	0.494438
GABRA4	0.822613	-1.02426	0.0848042
MTF1	0.876486	-0.0458855	0.057255
ZNF548	0.013216	1.57317	1.8789
PPIAL4A	0.578376	-1.50419	0.237789
APOA1	0.944089	0.0539642	0.024987
GCH1	0.357611	0.22482	0.446589
UTRN	0.05159	-0.484109	1.28743
ARAF	0.234784	-0.219717	0.629332
PTPRJ	0.374889	-0.35479	0.426097
C11orf49	0.464678	-0.16244	0.332848
LARP1B	0.0804971	-0.331814	1.09422
KLK8	0.218565	-1.47761	0.660419
ITGB3BP	0.698979	0.0405627	0.155536
KPNA4	0.0461843	0.277722	1.33551
ASIC2	0.899531	-0.683665	0.0459839
MCM3AP-AS1	0.579058	-0.332522	0.237278
PALM2-AKAP2	0.379703	0.2251	0.420556
ZNF407	0.864314	0.079692	0.0633287
ZNF142	0.525405	0.207555	0.279506
RSPH9	0.745667	0.851634	0.127455
TTC36	0.838057	-0.694926	0.0767267
PPARD	0.526801	-0.196424	0.278353
MTRF1L	0.103883	0.366993	0.983455
COPS9	0.0692506	0.13589	1.15958
MIA2	0.587416	-0.141203	0.231054
RAPGEFL1	0.917356	-0.0835525	0.0374623
PDK3	0.868918	-0.0527528	0.0610214
DLG3-AS1	0.479724	2.35208	0.319009
C2orf16	0.903147	0.112374	0.0442414
NR2F1	0.00437674	0.350361	2.35885
TCEANC2	0.611484	-0.0889442	0.213615
CHRAC1	0.331323	0.143391	0.479748
ZNF221	0.902077	-0.213619	0.0447565
TMEM59	0.861084	0.0195223	0.0649543
TMBIM6	0.23748	-0.0661974	0.624372
NF1	0.391058	-0.144597	0.407759
ALKAL1	0.00405686	-0.609755	2.39181
TBX3	0.690664	0.0752729	0.160733
VKORC1L1	0.561977	0.0785132	0.250281
ANXA6	0.028414	-0.322369	1.54647
GMFB	0.0573873	0.265507	1.24118
ZNF441	0.507264	-0.666731	0.294766
NATD1	0.722956	0.116591	0.140888
TMEM87A	0.498551	0.146847	0.30229
DYNC1I2	0.0516169	0.277147	1.28721
NIPSNAP3B	0.453175	-1.3545	0.343734
SYCE1L	0.915371	-0.0508766	0.0384029
ABCA1	0.590705	-0.436882	0.228629
HIST2H2AA3	0.740563	-0.089035	0.130438
HIST2H3C	0.141241	-1.00081	0.85004
HIST2H2BF	0.806243	-0.292537	0.0935338
MRPL14	0.453389	0.0739361	0.343529
GPR137C	0.555965	0.250074	0.254953
HBEGF	0.82696	0.120874	0.0825157
LYSMD2	0.954902	-0.0265859	0.0200411
FGF7	0.388091	-1.86014	0.411066
SLC27A2	0.458289	-0.26091	0.338861
FBXW11	0.9116	-0.0153261	0.0401958
SPAG5	0.0276539	0.352648	1.55824
SPINK8	0.89953	-0.68367	0.0459842
MAP3K20-AS1	0.565397	-1.66431	0.247647
HAUS7	0.0727583	0.447396	1.13812
ARHGAP19	0.224811	0.228089	0.648183
LCAT	0.279568	0.89352	0.553513
IL1R1	0.561026	0.695304	0.251017
COL21A1	0.532346	1.57827	0.273806
EIF2D	0.470957	-0.0980171	0.327019
KLHL31	0.800317	0.506329	0.096738
NLN	0.0347335	0.360406	1.45925
CENPK	0.468411	-0.117051	0.329373
POLH-AS1	0.825729	-0.21263	0.0831622
ATP2C1	0.53267	0.0997371	0.273542
CCDC190	0.902201	0.667226	0.0446968
DUS1L	0.795651	0.0261486	0.0992774
CNBP	0.355211	0.0859612	0.449514
ZNF829	0.185353	0.709839	0.732001
FASN	0.161898	0.1268	0.79076
GPR173	0.7098	-2.00811	0.148864
HES1	0.89113	0.0160073	0.0500588
GAS6	0.626751	-0.200557	0.202905
CCDC82	0.868926	0.0375508	0.0610174
DDX53	0.709797	-2.00814	0.148866
FAM110C	0.177423	-3.90603	0.750989
APOBR	0.902202	0.667214	0.044696
SRRM2	0.304344	-0.086607	0.516635
ABCA3	0.482451	-0.173401	0.316547
EIF4E3	0.218187	-0.265856	0.661171
KCTD5	0.250628	0.188729	0.60097
CLSPN	0.176769	0.515085	0.752595
TEKT2	0.864868	-0.189239	0.0630501
BBS10	0.576627	-0.124824	0.239105
FIZ1	0.527035	0.283071	0.27816
CNOT4	0.866985	0.0342035	0.0619882
FAHD2A	0.742304	-0.0762331	0.129418
KCNIP3	0.530401	-0.483322	0.275396
NKX2-2	0.710933	0.235216	0.148171
RBCK1	0.54969	-0.113335	0.259882
TMX4	0.650034	-0.0709534	0.187064
SARNP	0.878895	-0.0592117	0.0560632
HSP90B1	1.23924e-56	-1.06624	55.9068
CFAP52	0.973181	0.0892942	0.0118065
FAM96B	0.0875804	0.160896	1.05759
RRAD	0.843238	0.667249	0.0740496
HIST1H2AL	0.705847	2.02776	0.15129
MAPK9	0.621433	-0.0658178	0.206606
COG7	0.890374	0.0332815	0.0504275
CDC27	0.156576	0.1685	0.805274
FAM126B	0.428555	0.177179	0.367994
GJD2	0.985607	-0.0409944	0.00629633
ZNF732	0.859235	0.66725	0.0658881
RNF150	0.639896	-0.134838	0.193891
HCG25	0.686397	-0.588001	0.163425
HIVEP1	0.572687	-0.224055	0.242083
USP49	0.551242	-0.229006	0.258658
CCDC169	0.897745	0.667237	0.0468468
TOP1	0.171128	0.137838	0.766678
TMEM11	0.978378	-0.00425001	0.00949315
KRT17	0.0126994	-3.78325	1.89622
MAP3K3	0.34426	0.200969	0.463114
BHLHB9	0.20783	0.331411	0.682292
TAF12	0.0467896	0.310264	1.32985
MGAT4B	0.0782568	0.269723	1.10648
ENOX1	0.0736435	-0.624106	1.13287
MRNIP	0.980532	-0.0061044	0.00853808
RPL8	0.00424046	-0.151215	2.37259
SNX32	0.733147	1.34213	0.134809
JMJD7-PLA2G4B	0.276867	-0.51168	0.557728
DOK4	0.898048	-0.0665271	0.0467005
EREG	0.902205	0.667197	0.0446948
GABARAPL2	0.700638	0.0324966	0.154506
ATF7IP	0.326596	0.254087	0.485989
PLEKHG5	0.458255	-0.518138	0.338892
NPIPB5	0.11738	0.416144	0.930405
IQGAP3	0.675891	-0.117082	0.170123
NPAS2	0.804506	0.114415	0.0944708
KIRREL1	0.24266	-0.380759	0.615002
ZNF730	0.902205	0.667197	0.0446948
TMEM116	0.992446	-0.00310906	0.00329298
UCKL1	0.220633	-0.256834	0.65633
DDX27	0.751881	0.0476873	0.123851
RNF114	0.117303	0.20636	0.930691
PMEPA1	0.830147	-0.0740626	0.0808448
STX16	0.190603	-0.179806	0.71987
GGN	0.788636	-0.708395	0.103124
TRAF5	0.514434	-0.195076	0.28867
FUCA1	0.992188	-0.0017781	0.00340585
GEMIN5	0.914375	-0.0183255	0.0388755
LEMD2	0.78645	0.0582298	0.104329
MRPL22	0.0983353	0.191167	1.00729
SOS1-IT1	0.959908	-0.0425312	0.0177703
ZBED1	0.240184	0.305784	0.619456
LRP4-AS1	0.296692	-0.891929	0.527694
MVD	0.848144	-0.0495911	0.0715303
TMEM189	0.334926	-0.149248	0.475052
ARAP2	0.230445	0.699452	0.637432
FAM13B	0.134766	-0.35654	0.870419
ZNF280B	0.308283	0.270362	0.511051
ANKRD18B	0.187563	-0.399335	0.726853
ASCC1	0.494082	-0.136091	0.306201
PDS5B	0.1072	0.325437	0.969804
ZNF92	0.198763	-0.256359	0.701664
EID1	0.0951255	0.149602	1.0217
FAM13A-AS1	0.673035	0.425611	0.171962
KANSL1L	0.724781	0.17027	0.139793
PLPP3	0.607417	0.147635	0.216513
TBC1D8B	0.848577	-0.0897895	0.0713085
VPS4A	0.113051	0.203493	0.946725
WDR44	0.314445	0.217826	0.502455
FXYD6	0.36407	-0.237505	0.438816
MAGEA2	0.340347	0.3294	0.468078
BRIP1	0.361234	0.200926	0.442211
RHOXF2	0.834333	-1.03578	0.0786604
RIF1	0.237152	0.178534	0.624973
ATP8A2	0.612711	0.70007	0.212744
MIS18BP1	0.893667	0.0306726	0.0488244
NRL	0.730001	-0.341493	0.136677
LYRM9	0.182906	-0.569616	0.737773
PTPMT1	0.99801	0.000324656	0.000865201
HS6ST1	0.712344	-0.076345	0.14731
SLC29A2	0.790879	-0.0748205	0.10189
GJC3	0.524006	-1.67073	0.280664
WWOX	0.530222	-0.172867	0.275543
TOM1L1	0.0467319	-0.323802	1.33039
ARHGEF16	0.593002	-0.362843	0.226944
SESN2	1.97166e-05	-0.528187	4.70517
PRH1	0.578799	0.572519	0.237472
TRAF3IP2-AS1	0.0926888	-0.696992	1.03297
ZMIZ2	0.172772	0.294351	0.762527
SMPDL3B	0.356845	-0.268526	0.447521
MARC2	0.00782939	-0.782655	2.10627
PMS2	0.827665	0.102671	0.0821454
CTTN	0.23027	-0.120014	0.637762
DHX29	0.567763	-0.101727	0.245833
TRAM1L1	0.063759	1.11156	1.19546
TBC1D15	0.747013	-0.0512048	0.126672
ATP2B3	0.606831	-1.52522	0.216932
GJA3	0.56802	0.280672	0.245637
FTSJ1	0.635314	0.0766142	0.197011
TBC1D3K	0.370192	1.23692	0.431573
BOP1	0.0253118	0.300352	1.59668
STYK1	0.100847	3.08598	0.996337
PLTP	0.655245	-0.109627	0.183596
EPDR1	0.32269	0.34442	0.491215
F2R	0.73448	-0.0729514	0.13402
TTC21A	0.88118	0.243418	0.0549355
CXCL17	0.782942	-0.976207	0.106271
RCN1	0.000167488	-0.432508	3.77602
ACTB	5.07528e-08	0.294186	7.29454
XRN2	0.734494	0.0351052	0.134012
BTBD11	0.242974	-0.49847	0.61444
MAN1B1-DT	0.681482	-0.326776	0.166546
ZDHHC6	0.386444	0.14199	0.412914
C6orf48	1.59125e-08	-0.666433	7.79826
CD22	0.761238	-1.64538	0.11848
FLOT2	0.921574	0.0146301	0.0354698
SDF2	0.842859	0.0389224	0.074245
FGF14	0.902203	0.667208	0.0446956
BAIAP2-DT	0.398956	-0.335812	0.399075
IFT43	0.127562	-0.281434	0.894277
HOXC4	0.402318	-0.153865	0.395431
ADM	0.723037	0.132889	0.140839
BTBD10	0.23207	-0.281274	0.63438
C17orf97	0.175286	0.914342	0.756252
ZKSCAN4	0.913514	0.0488459	0.0392849
RGPD1	0.891727	0.667238	0.0497682
ACAP3	0.26412	-0.448134	0.578199
OGT	0.0125899	-0.317388	1.89998
ITGB1BP2	0.704506	-1.39271	0.152116
ARPC5	0.00807689	0.26037	2.09276
STX11	0.79791	-0.230317	0.0980459
PLXNA1	0.0876534	0.349944	1.05723
DDX21	0.742867	-0.0225139	0.129089
BMS1	0.0477641	0.266329	1.3209
STOX1	0.79796	-0.109776	0.0980187
RET	0.925645	0.0606222	0.0335553
PPP1R7	0.3727	0.10306	0.428641
PASK	0.987117	-0.0044354	0.00563139
CTNND2	0.89953	-0.683671	0.0459843
P2RY1	0.327846	-0.25037	0.48433
CPLANE2	0.369296	-0.655683	0.432626
STRN4	0.267025	-0.185402	0.573448
MT1X	0.297155	0.218727	0.527016
FECH	0.736392	-0.0632445	0.132891
CASC1	0.737662	-0.706336	0.132143
ABRACL	0.00953916	0.257321	2.02049
LRMP	0.646558	-1.65452	0.189393
TPRA1	0.172037	-0.319285	0.764379
KLLN	0.762763	-0.253055	0.117611
SMIM29	0.415118	-0.20172	0.381828
NF2	0.00315283	0.391124	2.5013
UBTD2	0.582296	-0.0867579	0.234856
TBC1D22A-AS1	0.76899	-0.665018	0.114079
CREBRF	0.129778	-0.472463	0.886797
DCBLD1	0.402541	-0.258624	0.39519
VTI1B	0.527529	0.0851614	0.277754
SFXN1	0.00127502	0.289467	2.89448
PSMA3	2.14593e-05	0.340938	4.66838
PIGH	0.441881	-0.13061	0.354695
AFAP1	0.743679	-0.112842	0.128614
COA4	0.0177318	0.226401	1.75125
DICER1	0.640966	0.0631708	0.193165
STX17-AS1	0.631398	-0.582014	0.199697
TSR3	0.206575	0.158276	0.684923
CAPN12	0.979247	0.0844202	0.00910776
EXOC7	0.0512243	0.26917	1.29052
VPS35	0.792682	0.0225383	0.100901
RNF144A-AS1	0.929265	-0.182952	0.0318605
ATRNL1	0.194689	-0.498954	0.710658
BMP4	0.772688	-0.0895701	0.111996
ATP5S	0.409579	-0.131832	0.387662
KCNQ1	0.899132	0.125476	0.0461764
MTMR12	0.350151	0.222058	0.455744
[truncated: 14,059 more rows]
