# Supplementary material for: MLL-AF4 and a murinized pSer-variant thereof are turning on the nucleolar stress pathway
Source: Cell Biosci. 2022 Apr 25;12:47. doi: 10.1186/s13578-022-00781-y (PMC9036721; doi:10.1186/s13578-022-00781-y)
Supplement: Supplementary file 9 — Additional file 9: MA4m volcano. [file 13578_2022_781_MOESM9_ESM.xlsx]

## Sheet: Sheet1
gene symbol	pvalue	log2	minus log 10
MADD	0.306904	0.277112	0.512997
MAST2	0.561082	0.160958	0.250974
STRN	0.379069	-0.188359	0.421282
PCLAF	0.521295	-0.0614019	0.282916
ZNF32	0.876604	-0.0290032	0.0571966
HIST1H1E	0.106196	1.57655	0.973891
LURAP1L	0.794067	-0.354248	0.100143
PDHB	0.224652	0.11642	0.648489
MRPL49	0.579218	0.080723	0.237158
SCP2	0.210831	0.138134	0.676065
CDC42EP2	0.535842	0.217835	0.270963
RGPD6	0.390746	-0.261589	0.408105
PROX1-AS1	0.76304	-0.673891	0.117452
ATP6V1E2	0.336003	0.429699	0.473657
KLHL17	0.728687	0.158147	0.137459
DBET	0.916988	0.576657	0.0376363
WDR64	0.920072	0.596669	0.0361781
NUDT3	0.492655	0.0879185	0.307457
KIF26B	0.777493	-0.184731	0.109303
KLHL35	0.663571	-2.57414	0.178113
MYOCOS	0.939487	-0.0745826	0.027109
EIF4ENIF1	0.450259	0.172137	0.346538
TRIM46	0.159314	-1.4669	0.797746
ARPC2	0.747467	0.0242279	0.126408
TSACC	0.614067	-0.243313	0.211785
CCT3	0.0254281	0.119893	1.59469
NFIA	0.436672	0.135509	0.359845
SLC39A9	0.0636058	-0.334422	1.1965
BCLAF1	0.00518898	0.235766	2.28492
DIRAS3	0.431559	-1.06202	0.36496
IL23R	0.920072	0.59667	0.0361781
VAMP8	0.921209	0.0272144	0.0356419
ACTR1B	0.419932	-0.143593	0.376821
RSF1	0.964556	-0.00837488	0.0156725
EMP2	0.449952	-0.115065	0.346834
KCTD11	0.879888	-0.110542	0.0555724
SZRD1	0.0872698	0.207296	1.05914
LRP5	0.927229	0.0266827	0.032813
TBCE	0.0626207	0.261019	1.20328
PDZD9	0.547381	1.80465	0.26171
RTKN2	0.385936	0.154051	0.413485
PNMA8A	0.418221	-0.135201	0.378594
FARP2	0.441301	0.136526	0.355265
KIAA1324L	0.390868	-0.290702	0.40797
SP8	0.596578	-0.310958	0.224333
MIOS	0.914461	-0.0263789	0.0388349
MOB1A	0.685179	0.0463412	0.164196
MAML1	0.82227	0.0411841	0.0849857
TIAL1	0.727986	-0.035002	0.137877
ARMC3	0.755329	0.793542	0.121864
MELK	0.947484	0.0101596	0.0234281
SLITRK5	0.0625259	-0.312684	1.20394
MYL12A	0.902215	-0.0141667	0.0446897
ZNF778	0.616011	-0.167741	0.210412
CNOT7	0.915488	-0.0135306	0.0383473
TMEM184B	0.491908	0.102358	0.308116
MTOR	0.394091	-0.143797	0.404403
ZNF768	0.159968	0.236488	0.795968
ZNF521	0.484835	0.524027	0.314406
ZNF81	0.335838	0.604741	0.473871
KLHDC1	0.706569	-0.674885	0.150845
DRAP1	0.141186	0.221225	0.850208
LONRF3	0.949304	0.0426199	0.0225945
MCMBP	0.720376	0.0381692	0.142441
FAM171A2	0.451145	0.2396	0.345684
KLHL20	0.623038	-0.123722	0.205486
SCHIP1	0.978268	0.00828661	0.00954215
TOB2	0.786037	0.0469413	0.104557
SNAI1	0.660008	0.47353	0.180451
MOCS3	0.525544	-0.203448	0.279391
STAU1	0.214824	0.139082	0.667917
CDH26	0.964388	-0.0930024	0.0157481
PTGIS	0.602778	2.1728	0.219843
ZNF444	0.680689	0.0877719	0.167051
SPTY2D1OS	0.909703	-0.0534347	0.0411003
RPL26	0.00391848	-0.193424	2.40688
PAQR5	0.924346	-0.0305564	0.0341653
UBE2J2	0.175786	0.207722	0.755015
TBC1D23	0.785858	0.062964	0.104656
OAZ1	4.36515e-05	0.271324	4.36
HS3ST1	0.0852663	2.18885	1.06922
CD99	0.860266	-0.0156738	0.065367
RPS27	0.1253	-0.113187	0.902049
BET1L	0.132983	-0.299861	0.876205
RPL23A	0.0205172	-0.140153	1.68788
G2E3	0.676337	-0.0753431	0.169837
ITM2C	0.372158	-0.143751	0.429272
USP37	0.972425	0.00809435	0.0121438
TTLL4	0.73805	0.0795332	0.131914
HECTD1	0.707821	-0.0628014	0.150076
PEX3	0.18341	0.270781	0.736578
SERPINE2	0.205742	-0.309355	0.686677
PSMG3-AS1	0.420621	0.456608	0.376109
EID2	0.946344	0.0110534	0.023951
CRLF3	0.390833	0.190816	0.408009
RNPEP	0.636299	-0.0584201	0.196339
DMRTA1	0.842411	-0.390556	0.0744762
NUFIP1	0.985882	0.00435759	0.00617502
MARS2	0.630638	0.11185	0.20022
DHRS13	0.995671	-0.00212258	0.00188419
CACNB3	0.470348	-0.345823	0.327581
KLRG2	0.234858	0.477123	0.629195
CKMT1B	0.235534	0.198889	0.627946
ADAMTS6	0.275958	-1.37638	0.559157
KPNA6	0.88495	0.0138608	0.0530813
C4orf51	0.920072	0.59667	0.0361781
TMEM80	0.691605	0.0716596	0.160142
TEP1	0.784753	0.139669	0.105267
SIX5	0.293137	0.355529	0.53293
TOB1	0.0666945	0.267976	1.17591
ZFAND4	0.0519248	0.851267	1.28462
HEXDC-IT1	0.612072	2.1616	0.213197
ABI1	0.965732	-0.00712676	0.0151435
YME1L1	0.606776	0.0484777	0.216971
NOTCH2NL	0.256031	-0.897179	0.591708
ZNF536	0.773965	-0.132449	0.111279
KISS1R	0.437208	-1.39687	0.359312
ARID3A	0.499627	-0.108354	0.301354
EPAS1	0.265188	-0.391853	0.576447
STRC	0.608698	1.58223	0.215598
ANKRD20A3	0.740623	-0.483047	0.130403
MSRB3	0.805021	-0.07017	0.0941926
VWA8-AS1	0.794794	-1.06068	0.0997454
MTCH1	0.0187803	0.241691	1.7263
NRM	0.738472	-0.0936946	0.131666
PPP1R3E	0.155804	-0.498776	0.80742
YBX3	0.220669	-0.0859855	0.656259
MAP3K10	0.58214	0.410641	0.234972
NPAS1	0.565497	-0.29047	0.24757
GMFG	0.117734	-2.93781	0.929098
TENM1	0.0278238	-1.09808	1.55558
PAUPAR	0.115568	-1.45315	0.937162
FAM215B	0.791729	0.23855	0.101423
HPS5	0.0429344	0.623218	1.36719
RANBP1	0.0277887	0.135079	1.55613
SPIRE1	0.433683	0.207093	0.362827
BTBD1	0.912386	0.0167378	0.0398213
LBHD1	0.189134	0.176222	0.72323
HSD17B10	0.133602	0.148382	0.874187
AK1	0.190444	0.223979	0.720232
SMC1A	0.43079	-0.0671979	0.365735
GNAT2	0.656606	-2.21439	0.182695
PRPF38B	0.877737	-0.0210365	0.0566354
GSTM1	0.419981	-0.226322	0.376771
BCL2L2	0.369268	-0.257158	0.432658
TUBG2	0.372795	-0.45033	0.42853
ZCWPW1	0.300943	-0.851191	0.521515
AP2S1	0.0217282	0.21404	1.66298
ITGB8	0.971491	-0.0437126	0.0125614
PON2	0.900379	-0.0232754	0.0455747
COPZ1	0.754536	0.0288724	0.12232
HBP1	0.702863	0.0991471	0.153129
PIK3CG	0.920072	0.59667	0.0361781
GEMIN7	0.0777372	0.331608	1.10937
SEMA3B	0.70209	0.463259	0.153607
SMPD2	0.50625	-0.282179	0.295635
RPL31	0.00326223	-0.179995	2.48649
ZNF343	0.846879	0.0783377	0.0721788
METTL21C	0.92277	0.576583	0.0349066
MAB21L1	0.956726	-0.0398691	0.0192122
EMX1	0.363932	-0.576413	0.43898
YOD1	0.168515	0.245102	0.773362
CHM	0.184861	-0.297114	0.733154
SMYD5	0.10067	0.492099	0.997098
RAB11FIP5	0.0955729	-0.491617	1.01967
DYSF	0.96586	-0.0901994	0.0150859
CCDC142	0.255999	0.620148	0.591762
EBP	0.246235	-0.146003	0.60865
NCBP2	0.016437	0.326231	1.78418
HDLBP	0.00659313	-0.231218	2.18091
MMP25-AS1	0.378403	0.404079	0.422045
MEGF6	0.635405	-1.36348	0.196949
SMIM2-AS1	0.476834	-0.588645	0.321633
MIS18A-AS1	0.522136	-0.772429	0.282217
AURKC	0.898037	0.513757	0.0467059
CGB1	0.569144	-3.33627	0.244778
AZIN2	0.618291	0.321368	0.208807
ANO7	0.177266	1.07428	0.751375
GRIK2	0.709434	-2.21139	0.149088
GJB7	0.938711	0.22408	0.027468
CGRRF1	0.0290501	-0.559145	1.53685
FAM76B	0.428725	0.212807	0.367822
DPY30	0.827453	-0.0235826	0.0822566
PLEKHB1	0.858682	-0.0645333	0.0661678
EP300	0.683275	-0.0692789	0.165405
L3MBTL2	0.421515	0.148273	0.375187
FAM72A	0.685539	0.0943054	0.163968
CACNA1H	0.771562	-0.14025	0.112629
SLC22A4	0.640373	1.22133	0.193567
CSNK1G3	0.671861	-0.0742803	0.172721
AGPAT4	5.93331e-05	-0.998942	4.2267
LRRC37B	0.792112	0.0971156	0.101213
MTHFS	0.122379	-0.235769	0.912294
MIXL1	0.818151	-0.280068	0.0871664
BCL7B	0.635137	0.0817361	0.197133
YKT6	0.737026	0.0479159	0.132517
LMO7-AS1	0.535358	-0.961287	0.271356
GCK	0.608198	2.15036	0.215955
TBL2	0.196661	-0.223421	0.706281
CHN2	0.366999	-0.483165	0.435335
CLEC4F	0.566536	-0.858367	0.246772
TTC13	0.900351	0.028553	0.0455882
NQO2	0.0933961	0.325348	1.02967
GALNT2	0.23215	0.144326	0.634232
PEX6	0.19482	0.935253	0.710366
TRIM68	0.948258	0.027231	0.0230735
POMT2	0.875612	-0.0424939	0.0576885
PSME2	0.812054	0.043301	0.0904151
CYBC1	0.208721	0.310915	0.680435
PFAS	0.675389	0.0596785	0.170446
HYI	0.359153	-0.257093	0.444721
IRF2	0.458927	-0.344351	0.338256
PFKFB4	0.354178	-0.49216	0.450779
PQLC2	0.189716	-0.327997	0.721897
AP1S3	0.428215	0.284208	0.368338
MAMDC2-AS1	0.231717	-3.55635	0.635042
ANAPC1	0.413839	0.158576	0.383169
WEE2-AS1	0.663424	0.535165	0.178209
PDIA3	0.00513276	-0.327651	2.28965
PLCG1-AS1	0.656692	1.5672	0.182639
TRIM63	0.920072	0.59667	0.0361781
WT1-AS	0.77021	0.474154	0.113391
CDC25A	0.490948	-0.0845732	0.308964
PRR36	0.224665	-0.866824	0.648465
EMC6	0.293926	0.124314	0.531762
RPS28	0.00346508	-0.186505	2.46029
MARCH10	0.751313	1.58225	0.124179
TAF1L	0.663569	-2.57416	0.178114
ACO1	0.377786	0.172786	0.422754
ARNTL2-AS1	0.709433	-2.2114	0.149089
MARCH8	0.429375	0.224443	0.367163
ADK	0.523469	-0.0866868	0.281109
PKD1L1	0.920069	0.596693	0.0361796
SYN1	0.562875	-0.712904	0.249588
IQCN	0.784876	1.59937	0.105199
PSMB4	0.816594	0.0138759	0.0879936
SSBP4	0.938528	0.0169799	0.0275527
GDF15	0.708973	-0.215467	0.14937
PGPEP1	0.207358	-0.444053	0.68328
MED30	0.12151	0.363796	0.915387
SLC30A8	0.920072	0.59667	0.0361781
RAD21	0.645062	0.0443775	0.190399
PEX2	0.0731069	0.375176	1.13604
LAMC2	0.535208	-0.8333	0.271478
SYNJ1	0.784474	0.0739302	0.105421
LARP1	0.439421	-0.0620311	0.357119
PAXBP1	0.373228	0.179838	0.428026
QPCTL	0.370451	-0.361617	0.43127
ADH1B	0.709433	-2.2114	0.149089
SSUH2	0.377556	-3.32919	0.423019
PHLPP1	0.688062	0.125142	0.162372
VPS16	0.669861	0.120825	0.174015
ABCB4	0.636307	-0.862178	0.196333
FLT4	0.811651	-0.0640171	0.0906305
CCDC58	0.236404	0.150499	0.626345
C1orf146	0.430432	0.638563	0.366095
CATSPER1	0.663571	-2.57414	0.178113
TBC1D3I	0.780123	0.475325	0.107837
HLA-DPA1	0.0258891	-0.691325	1.58688
GCNT4	0.0628165	3.16466	1.20193
FUT2	0.806298	-0.369916	0.0935042
EFCAB5	0.551687	0.954855	0.258308
ZNF251	0.875643	-0.0797416	0.0576731
SVIP	0.61035	0.0663117	0.214421
ANKRD16	0.748703	-0.120133	0.12569
MAN1A2	0.0238704	-0.375479	1.62214
MIER1	0.451854	0.11085	0.345001
TSNARE1	0.592341	0.451828	0.227428
XKR6	0.945993	-0.0399645	0.0241121
ARL14	0.540974	2.15112	0.266824
RPRML	0.109538	-0.573344	0.960436
MCPH1	0.971044	-0.0112582	0.0127613
LYAR	0.175603	0.171581	0.755468
JSRP1	0.538905	0.641553	0.268488
MIDN	0.166813	-0.208998	0.77777
PCDHGA11	0.254272	-1.77668	0.594702
HDHD5	0.695273	-0.0534691	0.157845
HADHA	0.0704943	-0.192123	1.15185
PSMB9	0.111616	-2.17355	0.952275
SORBS1	0.0268233	-1.26883	1.57149
SCARNA22	0.108701	0.713803	0.963766
EAF1-AS1	0.851885	0.326472	0.0696191
MAGED4B	0.764616	-0.0678014	0.116557
KAAG1	0.789467	1.56496	0.102666
WDR31	0.68401	0.372137	0.164938
RNF128	0.989451	0.00390721	0.0046056
BEX2	0.0692021	-0.23413	1.15988
MORC4	0.3415	-0.168313	0.46661
POLE3	0.0316764	0.210641	1.49926
PLA2G12B	0.535948	-3.61743	0.270877
PDK4	0.485436	-0.744327	0.313868
CTDSP1	0.394933	0.198715	0.403476
PDZD4	0.509626	-0.389023	0.292749
CREB5	0.218858	-0.228094	0.659839
CES3	0.810394	0.122758	0.0913036
KSR1	0.0429541	0.831342	1.367
HMGA1	0.465178	-0.0626385	0.33238
FGFR2	0.815626	-0.0553218	0.0885089
PARP14	0.753642	-1.55155	0.122835
DHX8	0.830419	-0.0391047	0.0807028
MEF2D	0.135268	-0.393783	0.868806
CCDC183	0.318072	-0.749413	0.497475
SLC35C2	0.726114	0.074297	0.138995
CDKN2B	0.00111653	0.82987	2.95213
CDKN2A	0.79025	-0.0181544	0.102235
AMMECR1	0.543701	0.105636	0.26464
CHRDL1	0.264896	1.38015	0.576924
PLD6	0.117957	-0.365673	0.928277
HBZ	0.214628	-2.24208	0.668313
PNPLA7	0.522036	-1.38313	0.2823
DNTTIP2	0.084367	0.234729	1.07383
SUB1	0.183303	0.0889328	0.73683
GOLPH3	0.920234	0.0158612	0.0361015
FMO4	0.448763	0.508259	0.347983
MED14OS	0.870237	-0.179416	0.0603623
SKIDA1	0.0408695	0.742196	1.3886
SPAG4	0.865416	0.153302	0.0627751
HIST1H2BC	0.662201	-0.430894	0.17901
SDHA	0.46831	-0.0984837	0.329466
NPIPB12	0.706987	0.149332	0.150589
RPL6	0.00129966	-0.179479	2.88617
SNX5	0.0211267	-0.207169	1.67517
ORAI3	0.560475	-0.195291	0.251444
TRABD2B	0.916198	-0.0778636	0.0380105
CDK18	0.814115	0.0719029	0.0893141
GPR89A	0.0652798	-0.389145	1.18522
FGF8	0.996918	0.0108464	0.00134068
NPM3	0.526197	0.0710487	0.278851
SUPV3L1	0.74945	-0.0526193	0.125257
FAM122C	0.859181	-0.0820998	0.0659152
FAM122B	0.372965	0.128168	0.428331
LACTB	0.802718	-0.068478	0.0954372
CORO2B	0.724455	0.691809	0.139989
ABCA7	0.650754	-0.270165	0.186583
ARHGEF1	0.414267	0.2504	0.382719
XAB2	0.936024	0.0324812	0.0287129
TOR1AIP1	0.59585	0.087376	0.224863
RGS16	0.00011594	-1.10889	3.93577
THAP9	0.793843	0.1174	0.100265
TSPYL1	0.000430979	0.310453	3.36554
RNF187	0.187322	0.113853	0.72741
MAK	0.82514	-0.173833	0.0834726
RSPH4A	0.235971	2.10997	0.627142
RWDD1	0.704158	0.0373673	0.15233
FOXP1-AS1	0.663571	-2.57414	0.178113
CFAP54	0.404565	1.50614	0.393012
FUNDC1	0.0352573	0.313733	1.45275
KCNF1	0.710874	2.16135	0.148207
SCAMP5	0.0697727	-0.581759	1.15631
SUPT7L	0.0411459	-0.33234	1.38567
SPIN2A	0.752944	0.26954	0.123237
NTPCR	0.648996	-0.0520503	0.187758
ABCB10	0.417487	-0.10319	0.379358
COG2	0.0973034	0.284489	1.01187
KDM6A	0.35028	0.218445	0.455585
ADGRA3	0.516772	0.193855	0.286701
EME2	0.803433	0.11562	0.0950502
COMTD1	0.465708	-0.12565	0.331887
MR1	0.794025	0.0903384	0.100166
PTRH1	0.856087	0.0659725	0.0674822
PARP11	0.514636	0.222241	0.2885
PNLIPRP1	0.637556	-2.21564	0.195482
PPP1R32	0.492107	1.06872	0.30794
ZNF48	0.801161	-0.0565505	0.0962801
MTFR1	0.986972	0.00262192	0.00569528
KCNIP4	0.413615	-1.2698	0.383404
SPTLC1	0.258738	-0.173617	0.58714
NFATC2	0.444104	-2.08846	0.352515
RIMS4	0.00737749	0.841044	2.13209
MAGEA12	0.789735	0.631984	0.102518
VEGFA	0.00289961	-0.586944	2.53766
JMJD6	0.00183439	0.519966	2.73651
GNPTG	0.427032	-0.173773	0.36954
SENP7	0.354501	0.304087	0.450382
DDOST	0.0121361	-0.223412	1.91592
COG5	0.0882034	-0.429407	1.05451
DIRC2	0.490232	-0.222598	0.309598
SCG3	0.86856	0.149838	0.0612
GABRA3	0.709433	-2.2114	0.149089
SOX21	0.838727	0.119168	0.0763793
RNF41	0.984622	0.00394431	0.00673059
SLC2A4	0.168086	-1.17599	0.774468
TRIM49	0.663569	-2.57416	0.178114
TMEM129	0.869097	-0.033063	0.0609315
SPRY3	0.324952	1.32623	0.48818
PPIC	0.0222615	-0.335414	1.65245
NUP214	0.846334	0.0386355	0.072458
FAM78A	0.698763	-0.234233	0.15567
GSAP	0.387749	-3.32973	0.411449
RRBP1	0.756418	-0.0626992	0.121238
FBXO48	0.975324	0.0124708	0.0108511
UQCC3	0.99837	0.000313437	0.000708268
ZNF155	0.674675	-0.362663	0.170905
NFIX	0.788307	0.0970297	0.103305
CEP97	0.729707	0.090946	0.136852
TSFM	0.444074	0.0971431	0.352545
SEMA6B	0.193203	-1.15947	0.713987
DHDH	0.0753279	-2.11336	1.12304
NUCB1	0.0477471	-0.330707	1.32105
TULP2	0.507179	0.965638	0.294839
TWF2	0.0552764	-0.395783	1.25746
ZNHIT1	0.353453	0.11228	0.451668
CLDN15	0.452244	-0.287407	0.344627
IRX3	0.47215	-0.20616	0.32592
EIF4EBP1	0.0097122	-0.247234	2.01268
P2RX2	0.786393	0.78141	0.10436
VTRNA1-3	0.608669	0.320486	0.215619
MXD4	0.66326	0.0636473	0.178316
ABHD2	0.264268	0.206986	0.577956
WDR93	0.98064	-0.0488213	0.00849036
FANCI	0.415513	0.0860466	0.381415
POLG	0.611962	0.0905301	0.213276
MAGEA9B	0.920072	0.59667	0.0361781
ACSF2	0.0326196	-0.774971	1.48652
FAM102A	0.781966	-0.11779	0.106812
TMEM92	0.421684	-1.51427	0.375013
PIP5KL1	0.396017	1.24329	0.402286
HPRT1	0.409548	-0.0615171	0.387695
SAMD14	0.902893	-0.148917	0.0443635
EIF1B-AS1	0.862897	0.220193	0.0640413
PLK1	0.195719	0.149327	0.708366
RNU6-2	0.114624	-1.24632	0.940724
CLPX	0.825751	0.043187	0.083151
YY1AP1	0.992298	0.00191742	0.00335773
KBTBD8	0.500307	0.260375	0.300763
FAM19A4	0.766412	-0.802405	0.115538
EOGT	0.567183	0.201389	0.246277
IST1	0.669281	0.0626871	0.174391
RC3H2	0.332886	0.129916	0.477705
INKA2-AS1	0.593826	-0.455912	0.226341
CGNL1	0.870251	-0.148933	0.0603555
SST	0.92277	0.576584	0.0349067
DENND5A	0.112513	-0.276184	0.948797
MYADM	0.0315693	-0.539931	1.50073
SLC45A1	0.712405	2.14955	0.147273
VAX1	0.466998	-0.480366	0.330685
NAP1L6	0.92277	0.576578	0.0349063
ADD3	0.4374	0.124557	0.359121
CHIC1	0.823684	-0.104116	0.0842395
DENND4C	0.417675	-0.228812	0.379161
IGFBPL1	0.992863	-0.0313989	0.00311071
CLCN3	0.404574	0.143469	0.393002
BAZ2B	0.725185	-0.0904706	0.139551
YEATS2-AS1	0.883489	0.809749	0.0537986
GRK3	0.811001	0.0585194	0.0909784
SLC39A8	0.494634	-0.117239	0.305716
ENPP4	0.107034	-0.403392	0.970479
IFNGR2	0.118215	-0.223996	0.927329
SLC25A16	0.09165	0.439361	1.03787
SHLD3	0.943521	-0.0337134	0.0252485
LOXL1	0.801719	-0.134404	0.0959776
ANKRD29	0.4948	-0.369656	0.30557
CCDC181	0.906423	-0.0330008	0.0426692
JAKMIP1	0.974341	0.0212181	0.0112889
STAG3	0.87778	0.305324	0.0566144
CLVS2	0.265337	-0.907376	0.576201
SLC10A7	0.23369	-0.412956	0.63136
C16orf87	0.305598	-0.164106	0.51485
TBC1D32	0.30062	0.31116	0.521982
MFAP3	0.868009	-0.128154	0.0614756
ELOVL6	0.946749	-0.0134618	0.0237649
PFKFB3	0.813639	-0.0467959	0.0895683
TRA2A	0.012218	0.240259	1.913
PRH2	0.701871	1.5982	0.153743
ZNF627	0.253663	-0.49612	0.595742
ZNF789	0.845849	0.0795125	0.0727072
WDHD1	0.452919	0.141713	0.343979
SEMA3C	0.339582	0.297908	0.469056
UBE2Q1	0.0505335	0.222548	1.29642
IL6R	0.150504	1.06184	0.822451
ADAR	0.782937	-0.0284524	0.106273
ARPC5L	0.676461	-0.0576332	0.169757
MRPS18A	0.301229	0.175613	0.521103
SART1	0.733973	0.0549258	0.13432
NAPA	0.967954	0.212841	0.0141454
CDC37	0.235993	0.107177	0.627102
RABAC1	0.200828	-0.176141	0.697176
GFPT2	0.860906	0.0675554	0.0650441
SLC19A3	0.11744	2.58594	0.930184
SYNGR2	0.589001	0.0625312	0.229884
NUP210	0.642245	0.0713601	0.192299
SIPA1L2	0.517414	0.202318	0.286162
CACNG7	0.586074	-2.54031	0.232048
CCDC146	0.250135	-1.23373	0.601825
LGALS3	0.385765	-0.490798	0.413677
UBQLN2	0.6658	-0.0607053	0.176656
RILPL1	0.788001	-0.09096	0.103473
CMTM1	0.266822	-1.27022	0.573778
TXLNA	0.13134	0.186071	0.881602
MTBP	0.914442	0.0395185	0.0388438
SNTB1	0.175071	-0.643119	0.756787
RNU4ATAC	0.626781	0.419211	0.202884
INPP5E	0.363628	0.225726	0.439343
MNAT1	0.303478	-0.154386	0.517873
MID1	0.116257	-0.180759	0.93458
MFSD13A	0.744586	0.0830938	0.128085
CBWD1	0.139599	0.204286	0.855118
PTPRG	0.9729	0.00893143	0.0119317
ANKRD42	0.392864	-0.296783	0.405758
PDLIM7	0.854984	-0.0458892	0.0680422
SRP72	0.295971	-0.109656	0.528751
IL18BP	0.602616	-0.77914	0.219959
CNP	0.260355	0.147545	0.584434
CD3EAP	0.776814	0.0529547	0.109683
MNX1-AS2	0.673219	0.41207	0.171844
RAP1A	0.562385	0.0748462	0.249967
MRPS30	0.017706	-0.343056	1.75188
GATD3B	0.850744	-0.0304513	0.0702012
NNT	0.584847	-0.0781721	0.232958
HDAC1	0.0519086	0.157253	1.28476
C1GALT1C1L	0.590943	-0.583772	0.228454
MADCAM1	0.884395	0.593217	0.0533537
ANK3	0.599219	0.133954	0.222415
PALM	0.897383	0.0418395	0.0470223
GADD45B	0.0814381	-0.72962	1.08917
SLC7A9	0.55173	-2.16511	0.258274
BUD31	0.743922	0.0389305	0.128472
PDAP1	0.603117	-0.0600458	0.219599
ALDH3A2	0.494961	0.095274	0.305429
PTCD1	0.200957	0.306096	0.696897
STRADA	0.063705	3.74731	1.19583
CD59	0.000742863	0.441998	3.12909
SNHG7	3.62732e-07	-0.591982	6.44041
C7orf31	0.641124	-0.19465	0.193058
FALEC	0.525467	1.08033	0.279454
SYTL1	0.565584	-0.476237	0.247503
RARS	0.128871	0.160969	0.889846
WWC1	0.674942	0.128437	0.170733
SRGAP2	0.262902	0.216368	0.580207
H2AFY	0.0920634	0.144919	1.03591
SCN9A	0.938186	0.0418894	0.027711
RASSF6	0.961478	-0.103216	0.0170605
SDC2	0.0446064	-0.254065	1.3506
UHRF1BP1L	0.497659	-0.209933	0.303068
NOP2	0.212485	0.395638	0.672672
GAPDH	0.858541	0.00992867	0.0662389
CHD4	0.783958	-0.0262154	0.105707
SLC47A1	0.486933	-0.185877	0.312531
KPNA1	0.978121	-0.00447744	0.00960745
RPGR	0.494126	0.236124	0.306163
CHIC2	0.516029	0.180294	0.287326
BRCA1	0.94194	-0.0106721	0.0259769
ORAOV1	0.406964	0.240229	0.390444
ALDH1A3	0.466231	-0.434103	0.331399
RNF185	0.850033	0.0448397	0.0705643
SHISAL1	0.463682	-0.463795	0.33378
CDR1	0.663571	-2.57414	0.178113
BOLA3	0.404347	0.0769834	0.393246
CDC42EP3	0.874573	0.0456515	0.058204
ZSCAN21	0.530685	0.194634	0.275163
YBEY	0.727367	-0.109935	0.138247
PLSCR4	0.900953	-0.0989354	0.0452978
SATL1	0.785381	-0.445791	0.10492
TCTE3	0.307265	-0.501461	0.512487
UBE2G2	0.307543	0.106397	0.512095
SMIM10	0.969848	-0.00939294	0.0132963
TMEFF1	0.472156	-0.152308	0.325915
SETD2	0.596841	0.111594	0.224141
REEP4	0.937783	-0.0179133	0.0278976
TNXB	0.920072	0.59667	0.0361781
TMEM30A	0.0474845	-0.271263	1.32345
COX7A2	0.15879	0.0799523	0.799176
GMDS	0.0360887	-0.381491	1.44263
WRB	0.269133	0.161987	0.570033
TNRC18	0.1421	0.418355	0.847407
BLMH	0.27779	0.146211	0.556283
SLC6A4	0.87986	0.592719	0.0555864
BBOX1-AS1	0.177423	-0.943572	0.750989
GALNT12	0.00263891	-1.06644	2.57857
NTN4	0.0727324	2.87549	1.13827
JKAMP	0.22837	0.208637	0.641361
ENPP3	0.758248	0.660433	0.120189
ZNF35	0.582334	-0.35901	0.234828
ABCA6	0.850848	0.566606	0.0701481
ABCA5	0.562565	-0.165856	0.249827
MYLPF	0.928407	0.0550758	0.0322616
WASHC5	0.491527	0.116553	0.308453
RSBN1L	0.657736	-0.0687603	0.181948
RPP25L	0.0896992	-0.240642	1.04721
ATP5MF	0.00459897	0.179722	2.33734
SETD6	0.309888	-0.209322	0.508796
SPTSSA	0.32917	-0.142151	0.48258
PABPC4	0.504691	0.0583184	0.296974
LAMA1	0.100367	-0.570702	0.99841
LRCH4	0.219947	-0.432726	0.657682
TNFAIP8L3	0.767389	0.647296	0.114984
ZNRF3	0.631226	0.111403	0.199815
ADPRHL2	0.658762	-0.0858572	0.181271
PNPLA4	0.324466	-0.413355	0.488831
MPPE1	0.163732	-0.445028	0.785865
KIAA0895	0.857076	0.0525801	0.0669804
UBR1	0.598131	0.145757	0.223204
SNAPC4	0.553441	0.161841	0.256929
TCHH	0.310863	2.17062	0.507431
VCPKMT	0.319377	-0.327238	0.495696
SOS2	0.0383763	-0.701474	1.41594
DAD1	0.547083	-0.0470097	0.261947
SEC23IP	0.502073	0.0907747	0.299234
SPATA20	0.724759	-0.143448	0.139807
CACNA1G	0.706004	0.567127	0.151193
SYCE3	0.559651	0.889212	0.252083
TOGARAM1	0.834962	0.0800474	0.0783333
SLC9B1	0.873454	0.292817	0.0587599
EVL	0.756931	-0.0557872	0.120943
H2AFZ	0.0534125	0.110552	1.27236
DNAJB14	0.551401	-0.140129	0.258533
MRPL33	0.424173	0.0846289	0.372457
SNHG3	0.149597	0.128785	0.825076
GLMP	0.667952	-0.0668541	0.175255
BDH2	0.583106	0.130018	0.234253
PICK1	0.928802	-0.0204213	0.032077
DEPDC5	0.789455	-0.0959633	0.102673
GNA13	0.642508	0.0744177	0.192122
TTC28	0.268469	-0.221253	0.571105
HOXB8	0.270321	0.313078	0.568121
SNRPD2	0.222053	0.0795316	0.653543
OPA3	0.119516	0.378305	0.922573
FOSB	0.423419	-1.19586	0.373229
EML2	0.31495	0.325796	0.501758
RTN2	0.894321	0.045517	0.0485067
TMC4	0.854725	0.467597	0.0681734
PEPD	0.617525	-0.0675055	0.209345
CYP2S1	0.40447	-0.581864	0.393114
AXL	0.116909	-1.73179	0.932151
NFKBID	0.166362	0.97074	0.778945
URB1-AS1	0.814391	-0.06922	0.0891671
ACY1	0.308929	-2.38676	0.510142
SIRT1	0.546095	0.104433	0.262732
MOGS	0.654144	0.0814653	0.184327
GEMIN8	0.969054	0.0125602	0.0136522
C8orf31	0.289948	0.848675	0.53768
DLGAP1-AS1	0.710462	-0.923151	0.148459
AVIL	0.45919	1.14233	0.338007
ZNF655	0.759986	-0.055038	0.119194
ROR1-AS1	0.993932	-0.0229924	0.00264311
CASC11	0.92277	0.576583	0.0349066
RNU5D-1	0.540276	1.59389	0.267384
HSFX4	0.856269	0.590217	0.0673896
CIB2	0.984696	-0.00416058	0.00669799
WASF2	0.533362	0.0888385	0.272978
PIGV	0.926947	0.0390385	0.0329452
HOXD3	0.866944	0.219988	0.0620087
CHN1	0.824095	-0.0621875	0.0840227
MTX2	0.8217	0.0342487	0.085287
PDE11A	0.490633	-0.620014	0.309243
GTF3A	0.178411	-0.135993	0.748579
RASL11A	0.183757	-0.797968	0.735756
GMPPB	0.0184774	-0.506501	1.73336
STEAP2	0.298796	-0.40682	0.524626
ZNF622	0.0666643	-0.415532	1.17611
NEO1	0.980482	-0.00557958	0.00856019
SNX33	0.568462	0.251155	0.245299
KLHL15	0.175899	-0.266588	0.754736
FBXO45	0.27339	0.267238	0.563217
KCNB1	0.957486	0.107804	0.0188675
FAM237A	0.787159	1.58225	0.103938
CUL7	0.22826	-0.485883	0.641571
ZNF260	0.683578	-0.121387	0.165212
TRIM36-IT1	0.717297	-0.93658	0.144301
NCAN	0.182084	2.90148	0.739729
PIGS	0.384434	0.10411	0.415179
TSEN2	0.816423	-0.0625522	0.0880847
ZDHHC1	0.269228	0.96188	0.569881
TPPP3	0.958051	-0.0460217	0.0186116
ADPRM	0.0139141	-1.02571	1.85655
SLC35B1	0.000759348	-0.38371	3.11956
CYSTM1	0.457407	-0.111606	0.339697
ZNF584	0.398056	-0.353691	0.400056
ENDOU	0.967087	0.212441	0.0145347
SLC26A10	0.203471	-1.84889	0.691497
ACVR1B	0.119584	-0.352161	0.922328
OS9	0.089362	-0.202836	1.04885
IGF2	0.341308	-0.594046	0.466853
LSG1	0.371333	0.250924	0.430236
SPHAR	0.791375	0.0640017	0.101618
VWA8	0.413682	-0.213665	0.383334
RGCC	0.495537	-0.284778	0.304924
ZXDB	0.973759	0.010714	0.0115486
IRF9	0.170437	1.12789	0.768436
ZNF568	0.101082	1.29407	0.995325
KLHL5	0.597166	0.150615	0.223905
FAM149A	0.185788	0.946472	0.730982
EFHB	0.531541	-1.38253	0.274463
SNTG1	0.663571	-2.57414	0.178113
IFT80	0.106841	0.397487	0.971262
SLC2A8	0.782097	-0.0668495	0.106739
STXBP1	0.155446	-0.311526	0.808422
IK	0.219019	0.157077	0.659517
MOB3A	0.188535	0.449976	0.724607
KRCC1	0.613487	0.168637	0.212194
RAB5C	0.436444	0.105796	0.360072
KAT2A	0.700991	0.0691109	0.154287
DHX58	0.714353	0.778911	0.146087
PM20D2	0.310961	-0.117677	0.507295
RARS2	0.378178	-0.193344	0.422304
HAGH	0.646252	0.0717065	0.189598
ANP32C	0.086253	-3.82834	1.06423
ZNRD1	0.364327	0.145956	0.438509
EEFSEC	0.897916	0.0409825	0.0467645
USP53	0.678109	-0.0954285	0.1687
SETD7	0.0735707	-0.271559	1.1333
ACTR3B	0.922405	-0.0198724	0.0350781
ARHGAP24	0.385473	-1.08868	0.414006
PELI2	0.755753	0.0980979	0.12162
ZNF318	0.787139	0.0734011	0.103949
ACTR5	0.990375	0.0035742	0.00420046
WFDC2	0.560258	-1.87301	0.251612
SHISAL2B	0.895123	-0.0799121	0.0481175
CST4	0.920072	0.59667	0.0361781
FAM83D	0.101118	0.326543	0.99517
PPP1R16B	0.233261	-1.00704	0.632158
TSPAN4	0.690332	0.121676	0.160942
KNL1	0.545574	-0.136097	0.263146
ALG14	0.925095	-0.018019	0.0338137
HAUS2	0.65548	-0.0906499	0.18344
RTF1	0.194089	-0.179856	0.711999
PARP6	0.29173	-0.284402	0.53502
POP7	0.877452	-0.018428	0.0567766
BNC2	0.251377	-0.603793	0.599674
FAM222B	0.335381	0.206813	0.474461
HECTD4	0.705674	-0.0923876	0.151396
SLC12A9-AS1	0.729133	-0.37301	0.137193
ARHGAP4	0.366193	0.834927	0.43629
NEDD8-MDP1	0.778579	0.0667518	0.108697
LRPPRC	0.000182715	-0.359617	3.73823
MZF1-AS1	0.968818	-0.0312288	0.0137577
C19orf70	0.0751706	0.217208	1.12395
SH3RF3-AS1	0.207465	-3.31431	0.683056
ATRX	0.812415	-0.031768	0.090222
OGFR-AS1	0.709433	-2.2114	0.149089
C1QL2	0.92277	0.576584	0.0349067
RALB	0.722787	0.0823088	0.14099
THNSL2	0.920072	0.59667	0.0361781
PDGFB	0.706105	1.59828	0.151131
TMEM218	0.882066	0.0305879	0.0544991
ACR	0.959341	0.226358	0.0180269
CABP7	0.296075	-2.61557	0.528598
RPL3	1.01172e-05	-0.253513	4.99494
ZMAT5	0.987073	0.00415193	0.00565058
R3HCC1	0.592313	0.109956	0.227449
FANK1	0.133373	2.89756	0.874932
SASS6	0.294117	-0.190166	0.53148
LELP1	0.920072	0.59667	0.0361781
UCKL1-AS1	0.861776	0.577829	0.0646054
CFAP65	0.789111	-0.185962	0.102862
PRSS16	0.239326	-0.487619	0.621009
SRPRA	0.115364	-0.218924	0.93793
DLX3	0.587982	-0.879585	0.230636
SPA17	0.303042	0.217944	0.518498
HUWE1	0.602219	-0.0607967	0.220245
FBXL19-AS1	0.242532	-1.03087	0.615231
HEXDC	0.120543	0.458739	0.918857
TIAM1	0.670927	0.0954276	0.173325
SNHG15	0.214933	-0.17608	0.667697
DTYMK	0.0946338	0.160653	1.02395
ATG4B	0.477474	0.12834	0.32105
ING5	0.0963945	0.324506	1.01595
TAP1	0.842862	-0.0553931	0.0742435
OCLN	0.329089	0.299105	0.482687
CFAP299	0.943582	0.212266	0.0252201
IFNA14	0.86587	-0.778673	0.0625475
C11orf71	0.561128	-0.201981	0.250938
HARBI1	0.104183	-0.904695	0.982204
MPG	0.477752	-0.10522	0.320798
C4orf33	0.375826	0.215662	0.425013
FRMD4A	0.504383	0.254457	0.29724
HNRNPU	0.334808	0.0609768	0.475204
ANGEL1	0.364914	0.265399	0.437809
TUT1	0.830848	-0.0541174	0.0804784
ACP4	0.92007	0.596682	0.0361789
IP6K2	0.529999	0.093892	0.275725
MGAT5B	0.416996	-0.667619	0.379868
FANCD2OS	0.755754	1.59902	0.121619
PRRT3	0.580876	0.232537	0.235916
TOP1MT	0.706076	-0.0768727	0.151148
IL17RE	0.502807	-1.26353	0.298599
CRELD1	0.000734562	-1.0962	3.13397
SRP68	0.517116	-0.071318	0.286412
MRPL43	0.208448	0.133118	0.681003
ST6GALNAC4	0.0878317	-0.516705	1.05635
KANTR	0.136428	-0.467502	0.865096
DNAJC27	0.964601	0.0226059	0.0156521
DAB2IP	0.272787	0.370566	0.564176
POMC	0.300538	1.47857	0.522101
RAD51	0.722767	-0.37518	0.141002
DDN-AS1	0.624196	0.604761	0.204679
GALNT8	0.266764	-1.64306	0.573872
CCNB2	0.55759	0.0830503	0.253685
PLEKHF1	0.426508	-0.515847	0.370073
RNF111	0.695746	-0.120749	0.157549
MAP2K6	0.324825	-0.246251	0.48835
CLMN	0.27979	-0.435945	0.553167
PLCH2	0.865604	-0.761858	0.0626808
SGCE	0.884613	-0.0407733	0.0532469
RBM48	0.565678	0.177902	0.247431
CASD1	0.301069	-0.355468	0.521334
FLYWCH2	0.395603	0.178476	0.402741
SLFN5	0.377431	0.514897	0.423163
PAQR4	0.753369	0.0697632	0.122992
AGAP1	0.203176	0.306985	0.692127
SKA3	0.435853	0.179334	0.36066
PRAP1	0.709432	-2.2114	0.149089
MICU2	0.431683	0.128199	0.364835
SLITRK1	0.723157	-0.961085	0.140767
GALNT11	0.233534	0.187546	0.63165
TMEM151B	0.838539	-1.10705	0.0764768
FAR1-IT1	0.92277	0.576583	0.0349066
ANGPT1	0.831539	-1.12234	0.0801172
TMED4	0.057334	-0.215553	1.24159
SETD4	0.602519	0.151451	0.220029
DNAJB11	3.87219e-13	-1.00832	12.412
MASP2	0.829369	-0.772129	0.0812522
RORA-AS1	0.700252	-0.911357	0.154746
NEAT1	0.239563	-0.210239	0.62058
PRPF6	0.393753	0.133326	0.404776
CTSZ	0.285311	-0.699771	0.544681
ABCC11	0.829837	-0.486087	0.081007
TENT4B	0.634076	0.0942834	0.197859
CTDSP2	0.898421	0.0245129	0.0465203
CKAP5	0.752169	0.0365431	0.123684
HTR1D	0.722069	0.50609	0.141421
OR10A2	0.754302	-1.01998	0.122454
CHCHD7	0.0253664	0.325074	1.59574
ZNF33B	0.0789236	-0.375856	1.10279
FMC1	0.54675	-0.0547129	0.262211
IQSEC2	0.795231	0.105742	0.0995069
MFSD14B	0.984422	0.00271961	0.00681879
ZNF682	0.501688	-1.86844	0.299566
SRC	0.640736	-0.186547	0.193321
PGAP1	0.0106947	-0.620155	1.97083
GRASP	0.540429	0.501356	0.267261
ZNF772	0.519116	0.421325	0.284736
AP2B1	0.936997	-0.0125155	0.028262
LIAS	0.679677	-0.13281	0.167697
TMEM156	0.663571	-2.57414	0.178113
TAC1	0.0597617	-3.83276	1.22358
PDS5A	0.340347	-0.12932	0.468078
ZYG11A	0.997531	0.00111133	0.00107382
ARRDC1-AS1	0.194683	0.413708	0.710671
FAN1	0.825218	-0.0639662	0.0834311
EIF1AY	0.709432	-2.2114	0.149089
ZNF707	0.977281	0.0210691	0.00998049
MAGEB6	0.918666	0.596571	0.0368422
CDK5R1	0.856408	-0.0665427	0.0673191
TNFRSF1B	0.475627	-2.23123	0.322733
PLPP1	0.28117	-0.326313	0.551032
RIIAD1	0.920072	0.59667	0.0361781
STX18-AS1	0.189572	-1.3506	0.722226
PHGDH	0.193089	-0.100007	0.714243
CSAG3	0.27615	-0.537426	0.558855
ALPK3	0.70785	2.18468	0.150059
IREB2	0.138069	-0.168427	0.859904
ZSWIM3	0.419681	0.461024	0.377081
ZNF750	0.566943	-1.63906	0.246461
RNF157	0.00627294	-0.635667	2.20253
ULK1	0.689665	-0.112469	0.161362
SECTM1	0.031061	-1.96518	1.50778
CBX8	0.092257	-0.408614	1.035
BANP	0.193391	-0.333367	0.713564
PPP1CA	0.58218	0.0534984	0.234943
HCFC1	0.365415	0.100988	0.437214
TAS1R1	0.709433	-2.2114	0.149089
UQCRH	0.37605	-0.0480031	0.424755
SLC39A4	0.521554	0.139261	0.282701
GPAM	0.153971	0.346882	0.812562
OBSCN-AS1	0.947171	0.0673793	0.0235714
MRPL55	0.339889	0.0913864	0.468663
KIAA1191	0.699482	0.0412518	0.155224
CNOT6	0.750016	-0.0450841	0.124929
PRKG1-AS1	0.578258	-1.87408	0.237878
TP63	0.663569	-2.57416	0.178114
SLC25A22	0.078551	0.394864	1.10485
DDX24	0.426949	0.0882815	0.369624
C21orf91	0.164725	0.305934	0.783241
EPHA8	0.4078	-0.427955	0.389552
OSBPL3	0.666521	-0.122048	0.176186
TEX15	0.397059	-0.546999	0.401145
HCN4	0.676735	-0.57529	0.169581
S100P	0.0463623	-4.43218	1.33383
NTS	0.201359	-1.74198	0.69603
APOBEC3D	0.348532	0.877092	0.457757
FARS2	0.343984	-0.285588	0.463462
CD81	0.194356	0.112543	0.711402
ST6GAL2	0.699373	-1.58573	0.155291
DERA	0.579436	-0.106699	0.236995
KLHL12	0.48239	0.135777	0.316601
RGS4	0.692705	0.434694	0.159452
CTBS	0.222548	-0.355746	0.652576
SSX2IP	0.78309	-0.0441825	0.106188
IGSF21	0.283678	-1.76853	0.547174
SHLD1	0.550008	-0.266429	0.259631
JMJD1C	0.831551	0.0660595	0.0801112
EEF2K	0.978033	0.00707376	0.00964669
ZP2	0.92277	0.576584	0.0349067
CRYM	0.401693	0.680553	0.396105
MTMR8	0.728909	-0.438012	0.137327
ZNF416	0.413917	0.61499	0.383086
MARCH3	0.782479	0.119272	0.106527
YPEL2	0.989324	-0.00604935	0.00466134
SYCP3	0.791421	0.459701	0.101593
NEDD1	0.316259	0.21513	0.499957
GAS2L3	0.521559	-0.205175	0.282696
CHMP1A	0.356452	0.162327	0.447999
SUGP2	0.859035	0.0264824	0.0659893
CAMKMT	0.300725	0.368478	0.521831
UGGT2	0.503449	-0.182481	0.298045
ZFP14	0.936	-0.0430201	0.0287243
C22orf34	0.789467	1.56496	0.102666
COL25A1	0.456193	-0.279012	0.340851
SOCS6	0.56144	-0.198384	0.250697
LMNB2	0.585661	0.0530392	0.232354
CPNE1	0.78499	-0.0393046	0.105136
MVK	0.563118	0.115228	0.2494
SEPSECS	0.674678	0.200958	0.170903
B4GALT6	0.970873	0.00724882	0.0128377
GLB1L2	0.638515	-0.140086	0.194829
LRRC49	0.78168	0.0888723	0.106971
PPP6R1	0.152248	-1.25786	0.817449
TUBGCP4	0.798429	-0.0481391	0.0977634
DGCR2	0.725011	0.0511883	0.139655
CNTNAP4	0.663571	-2.57414	0.178113
FAM83F	0.506899	-2.22737	0.295078
ANKRD55	0.920072	0.596669	0.0361781
HINFP	0.379039	-0.222418	0.421317
BSG	0.366405	-0.0767797	0.436039
PPL	0.776769	-0.448287	0.109708
EEF2KMT	0.804867	0.0712668	0.0942758
CYP4X1	0.411422	-1.50075	0.385713
ZNF75D	0.360722	0.344063	0.442827
ETFRF1	0.526395	-0.144535	0.278688
UNC50	0.0607124	-0.283312	1.21672
DEC1	0.92277	0.576584	0.0349067
TIMMDC1	0.0664413	0.21533	1.17756
NUFIP2	0.311024	0.123539	0.507206
KLHDC4	0.874917	0.0350198	0.0580333
MCM4	0.397933	0.0648101	0.40019
ARF3	0.601275	0.0577428	0.220927
PIK3R4	0.932174	0.0178361	0.0305029
ZNF775	0.531402	0.211171	0.274577
PIWIL1	0.850124	0.589556	0.0705177
ZNF777	0.540865	0.176924	0.266911
BLOC1S5-TXNDC5	0.000192685	-0.327624	3.71515
TRAPPC2	0.208645	0.241206	0.680591
ZNF605	0.566993	-0.301648	0.246422
LRP10	0.227159	0.294554	0.64367
PEX11G	0.873771	0.102336	0.0586024
PIGT	0.186859	0.192576	0.728485
SVIL	0.723036	0.159387	0.14084
C17orf102	0.92007	0.596682	0.0361789
FSIP1	0.545773	0.962376	0.262988
MATN4	0.820767	-0.377368	0.0857799
SLC17A7	0.983762	0.022789	0.00711001
PELI1	0.360694	0.256768	0.442861
PCSK6-AS1	0.149466	-1.46366	0.825459
PHLDB1	0.774447	0.0965225	0.111008
ANKRD13A	0.324526	-0.213251	0.488751
EFCAB10	0.470415	-0.421936	0.327519
APBA1	0.753898	-0.316959	0.122687
SGCZ	0.789467	1.56496	0.102666
PAPOLB	0.490053	-0.701125	0.309757
TCF7L1	0.721217	-0.162611	0.141934
TMEM245	0.662125	0.0664898	0.17906
PRUNE2	0.153712	-0.726116	0.813291
SMPD3	0.649836	-0.685527	0.187196
VTI1A	0.877783	0.0399477	0.0566127
COG4	0.653494	0.0916328	0.184759
PRAG1	0.700328	-0.357383	0.154698
DNLZ	0.794238	0.0725673	0.100049
GPATCH11	0.326869	-0.218478	0.485627
HSPB8	0.930627	-0.0713128	0.0312241
SFRP4	0.837537	-0.783883	0.0769959
NUP93	0.184635	0.179061	0.733686
CENPT	0.365793	0.232691	0.436764
TSNAXIP1	0.523132	-0.858616	0.281389
MEST	0.645524	0.73522	0.190087
CNTN1	0.781181	-0.0860679	0.107248
MPI	0.484097	-0.0873392	0.315068
CTTNBP2NL	0.952936	0.015209	0.0209363
SCARNA1	0.157347	2.3488	0.803141
ZNF550	0.119187	-0.870972	0.923772
ZBED5-AS1	0.265086	0.458087	0.576614
PPP2R3C	0.45747	0.133744	0.339637
NKAIN3	0.709433	-2.2114	0.149089
ZNF267	0.619854	0.141042	0.207711
RNPC3	0.911052	-0.0291962	0.040457
RACK1	0.025755	-0.135174	1.58914
DISP3	0.968148	0.21293	0.014058
CDRT4	0.0587256	-0.71739	1.23117
GNB4	0.90211	-0.0203817	0.0447405
HHLA2	0.920073	0.596666	0.0361779
OR7D2	0.920072	0.59667	0.0361781
SCN8A	0.739831	0.296946	0.130868
CCDC183-AS1	0.687194	1.03299	0.162921
ADAMTS10	0.87055	0.272866	0.0602063
ASB7	0.686917	0.11532	0.163095
GTF2H2C	0.879408	-0.0334918	0.0558097
ANKZF1	0.11919	-0.503042	0.923761
HDAC11	0.175134	0.624004	0.75663
CWC22	0.542553	0.13928	0.265558
AZI2	0.311995	-0.148937	0.505853
TGFBR2	0.1099	-0.593365	0.959003
CYP3A7	0.92277	0.576578	0.0349063
SERF1B	0.548376	0.0895191	0.260922
SMN2	0.169504	-0.200093	0.770821
GRB10	0.432416	0.136389	0.364098
ADCY10	0.756119	-0.893108	0.12141
LAMB3	0.982999	-0.0962415	0.00744673
ABHD11	0.19372	0.439503	0.712827
ALG9-IT1	0.709433	-2.2114	0.149089
ZNF436	0.735193	-0.140685	0.133599
HNRNPR	0.224155	0.0932356	0.649452
MAEA	0.372879	0.124124	0.428432
COBL	0.781862	-0.0971784	0.10687
MGST1	0.134268	0.212543	0.872028
STK33	0.496696	0.273996	0.303909
PTGER3	0.345308	-2.55325	0.461793
FASTK	0.0320024	0.490526	1.49482
TMUB1	0.81629	0.0381383	0.0881556
PHKA2	0.284854	0.336487	0.545378
C9orf85	0.126151	-0.372265	0.899109
TSKU	0.344119	-0.339242	0.463291
IGIP	0.820294	0.103309	0.0860307
PIK3AP1	0.82812	0.145051	0.0819069
KIF24	0.442077	0.345931	0.354502
DPF1	0.164638	0.516036	0.783471
ARAP1	0.62061	0.124999	0.207181
FAT4	0.650536	-0.273892	0.186729
S100A4	0.586712	-0.494588	0.231575
PLEKHG4	0.123183	-0.444403	0.909451
ZNF250	0.750581	-0.158236	0.124602
WDSUB1	0.359449	-0.262826	0.444362
ZNF79	0.574797	-0.389209	0.240485
RAC2	0.853648	-0.28304	0.0687213
LIF	0.84224	0.169718	0.0745639
C22orf23	0.474228	-0.532432	0.324012
PLXDC2	0.193513	-0.520847	0.713289
URGCP-MRPS24	0.402859	-2.55126	0.394847
PPP1R13L	0.71779	0.200035	0.144003
ZNF25	0.598019	0.312376	0.223285
WWTR1-IT1	0.709433	-2.2114	0.149089
EIF3F	0.00899596	-0.235674	2.04595
GTSE1-DT	0.311322	1.90305	0.50679
NUP62CL	0.105484	-0.465479	0.976812
SFI1	0.8575	0.0588872	0.0667658
PANX1	0.702581	0.187471	0.153304
UBAC2	0.693394	-0.062798	0.15902
CD2AP	0.684707	0.0718028	0.164495
ZBTB14	0.545884	-0.211148	0.2629
ARGLU1	0.813006	-0.0297641	0.0899062
TEX26-AS1	0.920072	0.59667	0.0361781
SPRN	0.741514	-0.155511	0.129881
HYLS1	0.330058	-0.304815	0.481409
NBEAL2	0.807206	-0.104652	0.0930158
CCDC12	0.379336	0.151261	0.420976
HDHD2	0.878842	-0.0358173	0.0560893
MTRNR2L5	0.857983	0.577943	0.0665212
CCDC57	0.881003	0.0697282	0.0550226
TRIM21	0.559469	0.335086	0.252224
CSNK1G2	0.492508	-0.101409	0.307587
REXO4	0.949739	0.0117366	0.0223958
GTF3C5	0.197338	0.193539	0.704789
HOOK2	0.0875352	-0.598319	1.05782
STX6	0.478702	0.170714	0.319935
GLUL	0.385554	-0.0697243	0.413915
DHX9	0.328556	0.0778077	0.483391
RNASEL	0.891442	-0.0617406	0.0499069
PP7080	0.343019	-0.206345	0.464682
FLVCR1	0.666193	0.0713663	0.1764
PTPRG-AS1	0.805287	0.0972255	0.0940495
A1BG-AS1	0.916878	0.0513281	0.0376883
GPR151	0.92007	0.596683	0.036179
ZNF483	0.701113	-0.72202	0.154212
CACYBP	0.0466481	0.144821	1.33117
AQR	0.82647	0.0411798	0.0827729
HOXA11-AS	0.330984	0.234897	0.480194
PCDHB16	0.92277	0.576578	0.0349063
YWHAH	0.123897	0.143956	0.90694
KCNN2	0.24227	1.6192	0.615701
AJM1	0.259568	-2.63067	0.585748
SH3PXD2B	0.937997	0.0252422	0.0277984
SLC25A25-AS1	0.466527	0.367457	0.331123
C11orf94	0.89618	-0.774314	0.0476046
BNC2-AS1	0.180116	-2.87524	0.744447
NENF	0.544344	-0.0542802	0.264126
CHFR	0.877183	-0.0459026	0.0569096
ST8SIA4	0.251742	0.85269	0.599045
NSL1	0.0688962	0.230734	1.1618
ADAMTS16	0.92277	0.576584	0.0349067
NCBP2L	0.909294	0.576776	0.0412959
ITPKC	0.299718	0.497838	0.523287
RBMS2	0.421834	-0.25474	0.374859
ATP5MG	0.0124361	0.152048	1.90532
MCF2L-AS1	0.308973	-0.699437	0.510079
SOX30	0.611491	2.58225	0.21361
FGF18	0.485208	1.07179	0.314072
RAB11B-AS1	0.614374	-0.21996	0.211567
DOLK	0.712242	-0.0862406	0.147372
ALOX5	0.969518	-0.0572152	0.013444
SFXN2	0.929372	-0.0188055	0.0318104
TBC1D3F	0.417732	-1.72551	0.379102
POU1F1	0.709433	-2.2114	0.149089
VSIG10	0.983199	-0.00737425	0.00735856
GAN	0.0818083	0.366933	1.0872
UPK2	0.834484	-1.10338	0.0785819
GNL2	0.736832	0.0459282	0.132632
MEI4	0.834635	0.445331	0.0785032
CDCA8	0.266729	0.167245	0.57393
NPNT	0.038546	-1.22356	1.41402
AGO4	0.477293	-0.240164	0.321215
DUSP3	0.637487	0.0557658	0.195528
ZFPM2-AS1	0.489998	2.59065	0.309806
GALM	0.141061	0.301393	0.850592
VASH1	0.810763	-0.0646135	0.0911059
ING3	0.88124	-0.0266451	0.0549058
MPP6	0.658248	-0.0739523	0.181611
GSDME	0.0676694	0.962589	1.16961
AHCY	0.0991955	-0.134263	1.00351
RIN2	0.299418	-0.733288	0.523722
POLR3F	0.936535	-0.0206581	0.0284762
YLPM1	0.376768	0.141042	0.423926
PPP1R37	0.523294	0.307426	0.281254
DCAF4	0.251097	-0.356953	0.600158
ITPRIP	0.356906	0.427378	0.447446
PPRC1	0.684185	0.0648698	0.164826
PDCD11	0.478384	0.131512	0.320224
CNNM2	0.539846	0.205248	0.26773
ADAM12	0.0908586	3.58593	1.04163
HNRNPA1L2	0.326172	-0.159774	0.486554
LHX8	0.40402	0.538268	0.393597
SNX7	0.809274	0.0448989	0.0919046
LRRIQ3	0.781101	-0.112198	0.107293
TYW3	0.0132526	0.381611	1.8777
ZDHHC9	0.941407	-0.0126813	0.0262227
ZBED6CL	0.103711	-0.557432	0.984176
SHC4	0.392274	2.16276	0.406411
TCEAL3	0.779969	0.13448	0.107923
PRSS37	0.469657	-4.20795	0.32822
PBX1	0.37428	0.137894	0.426803
NDUFA4L2	0.449655	-1.00513	0.347121
MAMDC2	0.753457	0.792945	0.122942
MROH8	0.669465	-0.432981	0.174272
TPST1	0.408655	0.286918	0.388643
TOR1AIP2	0.4805	0.0786358	0.318307
RCOR1	0.758279	-0.071296	0.120171
PLD5	0.418895	-1.02957	0.377895
PRPH2	0.793474	-1.53981	0.100467
TSNAX-DISC1	0.311839	0.824364	0.506069
PTPRK	0.621622	-0.123549	0.206474
GSTCD	0.28018	-0.224718	0.552563
INTS12	0.942652	-0.0149733	0.0256485
ZC3H3	0.186554	0.448309	0.729196
STRN3	0.206734	0.19324	0.684589
ZNF239	0.515106	0.249671	0.288103
ATP6V1G2-DDX39B	0.0104788	0.216181	1.97969
CAGE1	0.709433	-2.2114	0.149089
AQP12A	0.898838	-0.754229	0.0463184
PRIMPOL	0.75765	-0.102608	0.120532
ERAP1	0.0859161	-0.803822	1.06593
SERINC5	0.85652	0.0713646	0.0672623
ENPP6	0.920072	0.59667	0.0361781
ERAP2	0.0105461	1.71622	1.97691
CMYA5	0.612901	0.733785	0.212609
RANGAP1	5.43646e-05	0.475	4.26468
ZC3H7B	0.537944	0.0993638	0.269263
GDAP1	0.474055	-0.201463	0.324172
RAB2A	0.88348	0.0183923	0.0538034
GATAD1	0.939656	-0.013324	0.0270313
MINDY4	0.612055	0.356869	0.21321
HS3ST3B1	0.419291	0.17298	0.377484
SLC25A35	0.913431	0.056644	0.0393242
SKA2	0.970097	-0.00377302	0.0131848
PLCB1	0.828399	0.0593424	0.0817607
NPIPA2	0.151471	-0.751124	0.819671
CACNA2D2	0.612407	-0.265868	0.21296
MPV17L2	0.648976	0.0863122	0.187771
NOVA2	0.716094	0.493425	0.14503
AES	0.348332	-0.142464	0.458006
PTOV1	0.358556	0.0983298	0.445443
KIF1B	0.93334	0.0141775	0.0299602
TXNDC5	0.898838	-0.754229	0.0463184
CLRN1-AS1	0.920072	0.59667	0.0361781
TXNDC12-AS1	0.817219	-1.10751	0.0876617
ANKMY2	0.991479	0.00311793	0.00371662
MED7	0.730492	0.0844456	0.136385
ACTR3C	0.660148	-0.441137	0.180359
RPS20	0.105489	-0.0950468	0.976795
CMTR2	0.439233	0.285277	0.357306
OXTR	0.156103	-2.77534	0.806589
TAOK1	0.57835	-0.0814742	0.237809
CCDC163	0.279518	-0.494521	0.553591
C4orf36	0.44414	1.43083	0.35248
IPO4	0.399727	0.106395	0.398237
MAP4K5	0.955826	0.0114771	0.0196213
CCDC74B	0.203878	0.481148	0.69063
LTC4S	0.748824	0.632948	0.12562
ATRIP	0.505202	0.180464	0.296535
PSMD5	0.681762	-0.564683	0.166367
L3MBTL1	0.487093	0.44564	0.312388
TMEM101	0.0232451	-0.382516	1.63367
XK	0.941915	-0.0329323	0.0259882
CHAC1	0.000914072	-1.29264	3.03902
WWP1	0.469954	-0.150952	0.327945
SPARC	0.896126	-0.027824	0.0476309
CLDN5	0.751114	1.58225	0.124294
EIF3C	0.250197	0.104205	0.601718
PTGDR	0.92277	0.576584	0.0349067
ZCCHC4	0.849112	-0.0734321	0.071035
TGFA	0.574853	0.784252	0.240443
CAMK2N1	0.740644	-0.0841797	0.130391
TCP11L2	0.757152	-0.543944	0.120817
TMCO4	0.945231	-0.0396365	0.0244618
DACT3-AS1	0.920072	0.59667	0.0361781
SERINC2	0.00355259	0.994802	2.44946
SYNGAP1	0.741193	-0.104163	0.130069
LYN	0.628696	0.110166	0.201559
LMLN2	0.663571	-2.57414	0.178113
LRRC43	0.949345	0.200585	0.0225761
SLTM	0.552096	-0.102411	0.257986
CTDSPL2	0.722696	-0.0712656	0.141044
TOMM40	0.0927144	0.188654	1.03285
NECTIN2	0.0818487	-0.363824	1.08699
RNF216	0.882374	-0.0292715	0.0543472
SPPL3	0.373132	-0.151854	0.428137
APOC1	1.893e-05	-0.663441	4.72285
GAREM2	0.993995	0.00321184	0.00261563
U2SURP	0.429728	0.0715844	0.366806
TTC8	0.243114	-0.309703	0.61419
MFSD12	0.297591	0.224721	0.52638
DDX55	0.0928967	-0.255017	1.032
MED17	0.904484	0.0493873	0.0435993
PLEKHM3	0.700874	0.156283	0.15436
PRNP	0.133583	-0.264441	0.874248
RNASEH1	0.235923	0.240908	0.627229
RPS7	0.209903	-0.0761384	0.67798
PSKH1	0.930332	0.0201329	0.0313621
MRM3	0.0992677	0.30211	1.00319
PARP3	0.670152	-0.212558	0.173826
FBXW8	0.845077	0.0947869	0.0731038
RBM17	0.886231	0.0152249	0.0524529
SCARNA14	0.60126	0.476266	0.220938
LRRC56	0.511408	1.18481	0.291233
ZBTB11-AS1	0.646237	0.165277	0.189608
BSDC1	0.641311	-0.0615449	0.192931
TMEM234	0.847261	-0.0606243	0.071983
STMP1	0.641857	0.0469633	0.192562
CCDC28B	0.339464	0.209366	0.469207
IQCC	0.607121	0.164736	0.216725
NEURL4	0.456141	1.4175	0.340901
AIFM2	0.249372	0.589434	0.603152
ST8SIA6-AS1	0.440205	-3.60695	0.356345
MRPL48	0.324792	0.156718	0.488394
RAB6A	0.411976	-0.136231	0.385128
CYP46A1	0.891772	0.59398	0.0497462
LCN15	0.198165	-1.74723	0.702973
PDE4A	0.812805	-0.114718	0.0900138
ASB8	0.866514	0.0283524	0.0622242
TMSB15B-AS1	0.95571	-0.110951	0.019674
RPS6KB2	0.239537	0.203409	0.620628
MRAP2	0.434882	0.595321	0.361629
SF3B6	0.17721	0.100791	0.751511
CETN2	0.842006	0.0246401	0.0746847
NINJ1	0.916644	0.0281562	0.0377994
BARX1	0.641522	0.202658	0.192788
CYP26B1	0.879569	0.0937733	0.0557299
OR2A1	0.663571	-2.57414	0.178113
MRPL35	0.0525937	0.277452	1.27907
CCNL2	0.120281	-0.24349	0.919804
AMY1A	0.700983	1.20774	0.154292
AGTRAP	0.804365	0.0407201	0.0945467
CD163L1	0.92277	0.576578	0.0349063
FAM200B	0.301306	-0.159041	0.520992
SRRM3	0.519823	-0.498674	0.284145
THOP1	0.0391406	0.233493	1.40737
ZNF556	0.784876	1.59936	0.105199
ZNF554	0.501329	-0.335023	0.299877
RAB33B	0.980519	-0.00689777	0.00854404
C15orf62	0.24448	-3.09504	0.611756
PNP	0.021415	-0.29544	1.66928
NEDD4	0.924727	0.0364193	0.0339864
LUCAT1	0.920072	0.59667	0.0361781
PDCD2	0.566051	0.0536683	0.247144
WDR7	0.682615	0.143512	0.165824
DNAH7	0.231856	-2.51232	0.634781
SELENOI	0.650506	0.0763107	0.186749
FAM78B	0.905755	-0.18278	0.0429893
RCBTB1	0.562184	-0.124996	0.250121
PHF11	0.442468	0.451062	0.354118
MED4	0.162416	0.181049	0.789372
LRCH1	0.517538	-0.231372	0.286058
SUCLA2	0.0679882	0.245069	1.16757
NBEA	0.72457	0.124499	0.139919
FAHD2B	0.422222	0.231335	0.374459
TC2N	0.0241732	-0.670462	1.61666
DCX	0.859889	-0.779679	0.0655575
CD82	0.0559973	1.17441	1.25183
CAPN6	0.90514	0.576852	0.0432843
SERTAD4-AS1	0.199769	-0.635908	0.699471
PELI3	0.332303	-0.385404	0.478466
TATDN3	0.655434	0.089713	0.183471
HES7	0.522536	-0.940674	0.281884
MAN2A1	0.712114	0.0896052	0.147451
ANKRD10	0.745511	-0.067615	0.127546
SREBF1	0.933652	-0.021662	0.0298148
MTRNR2L12	0.624631	0.115548	0.204377
KIF11	0.146302	0.167546	0.834748
SAV1	0.359114	0.145317	0.444768
AMN1	0.0634349	0.718279	1.19767
BICD1	0.97224	0.0147755	0.0122266
IGF1R	0.538414	0.123699	0.268884
TMEM43	0.908576	0.0206394	0.0416388
MTSS1	0.266085	0.726246	0.574979
KIAA0232	0.888805	0.0383213	0.0511934
OSR1	0.977911	-0.0504141	0.00970063
MAMLD1	0.759824	0.223006	0.119287
ST6GALNAC5	0.240373	-1.86474	0.619114
ZNF346	0.580757	0.131563	0.236006
UNC5A	0.0951668	-3.07835	1.02151
ARL13B	0.820121	-0.0597182	0.086122
TIGD7	0.151722	1.27443	0.818952
PDPK1	0.280229	-0.224281	0.552487
TM7SF3	0.574885	0.0916682	0.240419
CRADD	0.507715	0.218254	0.29438
DEF8	0.149484	0.177128	0.825404
MDK	0.00108859	-0.335712	2.96314
AMBRA1	0.707299	-0.0976103	0.150397
ST8SIA1	0.464149	2.15232	0.333342
CLEC4A	0.692853	1.58225	0.159359
CMAS	0.343178	0.112295	0.464481
HCFC2	0.45571	0.256601	0.341311
PRKAB1	0.458456	0.178655	0.338702
XYLT1	0.068017	-1.7321	1.16738
PSMD6-AS2	0.714151	-0.870528	0.14621
HS3ST6	0.849337	-0.766217	0.0709202
RERE	0.85978	-0.0389477	0.0656129
LHPP	0.769944	-0.0814226	0.113541
INHBA-AS1	0.92277	0.576584	0.0349067
TAX1BP1	0.429297	-0.08466	0.367242
ADAMTSL3	0.404306	-2.24222	0.39329
DPYSL2	0.284607	0.230622	0.545755
STEAP1B	0.823872	0.151789	0.0841405
MPRIP-AS1	0.861783	0.213956	0.0646019
ITGA1	0.225456	0.595188	0.646938
FOXO1	0.225069	0.301799	0.647684
RAB6C-AS1	0.446773	-0.853923	0.349913
FBXL5	0.478222	-0.151912	0.32037
ARHGEF17	0.487742	-0.830944	0.31181
KRTAP19-1	0.880273	-0.0969455	0.0553826
GUCD1	0.161	0.212282	0.793173
VSNL1	0.520477	1.59306	0.283599
KATNBL1	0.918892	0.0230181	0.0367357
EMC7	0.0855447	-0.214456	1.06781
SMG9	0.951965	-0.0147947	0.021379
UBE2D2	0.771255	0.0294775	0.112802
SLC30A9	0.713608	-0.04442	0.14654
DIAPH1	0.0956295	0.312225	1.01941
IER5	0.970575	0.00545119	0.0129711
COPS2	0.191372	-0.169155	0.718121
GABRB3	0.935113	-0.0223358	0.0291358
ANKHD1	0.0535189	0.670601	1.27149
OLAH	0.997171	-0.0107795	0.00123028
RPP38	0.852056	0.0369347	0.069532
NMT2	0.989652	-0.00252399	0.0045175
ANKRD20A1	0.684846	-0.874514	0.164407
TMEM45A	0.343862	-0.258895	0.463616
ZNF678	0.420293	-0.1655	0.376447
RYK	0.683357	-0.0774204	0.165353
TOPBP1	0.184628	0.201794	0.733702
SNRK	0.434931	-0.24155	0.36158
LDOC1	0.552235	0.100179	0.257876
EXT1	0.448797	-0.162811	0.34795
MAPK12	0.581197	-0.120172	0.235677
TMEM215	0.920072	0.59667	0.0361781
SHMT2	0.0774785	-0.174072	1.11082
RNFT2	0.585011	0.149412	0.232836
QRFPR	0.646692	0.386849	0.189302
POFUT2	0.76833	0.0717675	0.114452
FAM157C	0.416116	2.17183	0.380786
PDZD7	0.476069	-0.503306	0.32233
MAPT	0.723062	0.100419	0.140824
YAF2	0.506491	0.146206	0.295428
SLAIN1	0.213217	0.177675	0.671179
ISPD	0.688963	0.251759	0.161804
DIAPH3	0.372198	-0.159347	0.429226
NPIPA7	0.235302	0.551446	0.628375
MSL3	0.824166	-0.0528457	0.0839853
CLNS1A	0.327362	-0.0852085	0.484971
TRIB3	2.8284e-06	-1.13001	5.54846
PTPA	0.558006	0.100148	0.253361
TRAPPC8	0.0119907	0.401413	1.92116
CMC1	0.132304	-0.203503	0.878426
CCDC43	0.547148	0.0768416	0.261895
AKAP9	0.892153	0.0268336	0.0495608
GPM6A	0.262291	-0.358642	0.581217
ZKSCAN7	0.780174	1.56508	0.107808
OR8D1	0.920072	0.59667	0.0361781
HECA	0.609237	0.114837	0.215214
FAM237B	0.523629	-1.87038	0.280976
IFRD1	0.000434877	-0.499651	3.36163
CBX6	0.245434	0.129574	0.610066
TRMT44	0.986026	0.00667111	0.00611156
ISL2	0.669291	-0.103597	0.174385
PKD2L1	0.709433	-2.2114	0.149089
MOCS2	0.192475	0.182855	0.715625
ITGA2	0.841379	0.0879223	0.0750083
AKR1C4	0.663571	-2.57414	0.178113
COPS8	0.0991748	0.181796	1.0036
BARD1	0.200094	0.247092	0.698767
FSTL5	0.882852	0.593056	0.0541119
DHRS7	0.711943	0.0516042	0.147555
PPM1A	0.471388	0.136323	0.326622
MSX2	0.00769006	0.616247	2.11407
SAP30BP	0.618006	0.0851029	0.209007
VPS11	0.960815	0.0124671	0.0173601
WDR92	0.0224277	0.601641	1.64922
ZNF487	0.24626	-0.709058	0.608607
DDR1	0.318066	-0.388097	0.497483
LRCOL1	0.920072	0.59667	0.0361781
FLJ45513	0.734311	0.707923	0.13412
RPP25	0.339881	-0.171891	0.468673
GRINA	0.860227	0.0215295	0.0653869
MAT1A	0.844954	0.578364	0.073167
ARIH2	0.327023	-0.118779	0.485422
PLPPR3	0.440102	-1.29407	0.356446
WRNIP1	0.870308	0.0237243	0.0603272
MRS2	0.662703	-0.0654911	0.178681
DNAJC19	0.993749	-0.00104851	0.00272347
PARP2	0.10989	0.279694	0.959042
GSTP1	0.00404401	0.181998	2.39319
SMIM11A	0.361976	0.175658	0.44132
FDX2	0.691312	0.0771457	0.160326
EXOC3L1	0.906571	0.253667	0.0425982
TRIML2	0.920072	0.59667	0.0361781
RNA5S14	0.790641	-0.643371	0.102021
POU2F2	0.460272	-0.818107	0.336985
CLHC1	0.955619	0.0341784	0.019715
NEUROD1	0.258458	1.98633	0.58761
DLG5	0.997114	-0.000680693	0.00125523
DUSP19	0.56221	0.222536	0.250102
FRZB	0.590716	-2.5426	0.228621
NCK1	0.340118	-0.196392	0.468371
TMED6	0.952705	0.118249	0.0210417
FMOD	0.709433	-2.2114	0.149089
ZBED9	0.503587	0.291422	0.297926
TRMT1L	0.039056	0.384521	1.40831
IFI6	0.712969	-0.0780857	0.14693
AHDC1	0.107518	-0.670981	0.96852
CASC19	0.987998	0.0383665	0.0052438
LPP	0.131519	-0.36227	0.881011
PCOLCE	0.822576	-0.10402	0.0848241
DAXX	0.295194	0.160314	0.529893
RIMBP3C	0.15606	2.33611	0.806708
STK17B	0.785767	0.0649546	0.104706
CDC123	0.0534102	0.17994	1.27238
PHC3	0.0138053	0.754465	1.85995
AUTS2	0.591638	0.0674085	0.227944
PIAS1	0.974209	0.00540035	0.0113477
RALBP1	0.1947	0.241786	0.710635
MIS18A	0.55345	0.0611432	0.256922
PYCR3	0.802363	0.0646987	0.0956292
TSTA3	0.739478	0.0757027	0.131075
NUDT10	0.677003	0.112126	0.169409
ZNF300	0.891429	0.0687213	0.0499131
TNIP1	0.466591	0.153971	0.331064
G3BP1	0.137117	0.137758	0.862909
SUMF2	0.489802	-0.088133	0.309979
ZNF628	0.818898	0.102403	0.0867701
MMP2	0.403656	-0.481725	0.393988
EEF1D	0.0543922	-0.14526	1.26446
STRADB	0.851095	-0.036832	0.0700218
PDZK1	0.688164	0.767134	0.162308
YTHDC1	0.69072	0.0596434	0.160698
A4GALT	0.781696	-0.246435	0.106962
ATF4	0.615432	-0.0315442	0.21082
SLCO3A1	0.79775	0.584192	0.0981329
LANCL2	0.608548	0.119266	0.215705
DDC	0.931175	0.189961	0.0309687
FIGNL1	0.300262	0.194001	0.522499
SEC61G	0.00160616	-0.220379	2.79421
PACERR	0.850215	-0.781412	0.0704712
CBFA2T2	0.283154	0.334282	0.547978
NUCKS1	0.233082	0.0722168	0.632492
ABHD1	0.683797	-0.298331	0.165073
MEIS1	0.969932	-0.0106315	0.0132587
MAP2K4	0.781715	0.0502168	0.106952
EIF3H	0.0106423	-0.183905	1.97296
UTP23	0.0963473	0.329929	1.01616
SLC38A3	0.701942	-0.256256	0.153699
OLMALINC	0.437871	-0.191108	0.358654
MSANTD4	0.606987	-0.119095	0.21682
TNPO2	0.998059	-0.000398024	0.000843806
ZNF721	0.602321	-0.112679	0.220172
CCNI	0.379689	-0.100838	0.420572
TOMM7	0.846883	-0.0113534	0.0721767
EFR3A	0.955569	-0.0131518	0.0197381
ENOPH1	0.637706	-0.0650719	0.19538
LIN52	0.910462	0.0234636	0.0407381
E2F5	0.454351	0.130613	0.342608
ABCB8	0.506785	0.141103	0.295177
C2orf42	0.144574	0.639003	0.839909
TRAK2	0.957503	0.0160759	0.01886
MAPK4	0.824698	0.219833	0.0837051
ATF5	0.180505	0.499485	0.743512
MRPL57	0.55851	0.061498	0.252969
EIF4B	5.32584e-05	-0.339288	4.27361
ERVH48-1	0.92277	0.576583	0.0349066
BMP5	0.672752	2.17298	0.172145
NRXN3	0.898833	-0.036231	0.0463209
PPP1CB	0.996647	0.0004021	0.00145875
ADAT3	0.874613	-0.9108	0.0581843
ABCD1	0.769822	0.200785	0.11361
SLC25A38	0.573433	0.117507	0.241517
ESS2	0.917742	-0.0199788	0.0372795
CSRNP1	0.440271	-0.416842	0.35628
CRYBB3	0.529058	2.1619	0.276496
GRID2	0.325083	-1.5842	0.488005
TRIM59	0.262481	0.212318	0.580902
IQCH-AS1	0.260107	0.95374	0.584847
CRLS1	0.661278	-0.0575325	0.179616
ZNF394	0.954956	-0.0198281	0.0200166
UBAP2L	0.129831	0.154274	0.886623
PARD6A	0.915408	0.0673308	0.0383855
ZNF821	0.616902	0.21849	0.209784
STRAP	0.0877058	0.130039	1.05697
SLCO1C1	0.512425	-2.22674	0.29037
AEBP2	0.11915	0.272533	0.923906
DDX19A	0.782689	-0.0416325	0.106411
SLC9A6	0.705792	-0.0962354	0.151323
PRDX1	3.27365e-08	0.372984	7.48497
DDX58	0.371983	-0.798753	0.429477
DDX19B	0.727097	-0.0805595	0.138408
CMTM7	0.855183	-0.0376398	0.0679408
FBXL2	0.0999645	-0.5631	1.00015
EEF1AKMT3	0.154164	-0.622081	0.812016
TTC34	0.526645	-0.949456	0.278482
SYTL4	0.25151	-0.551048	0.599444
ATAD3C	0.352775	1.32821	0.452502
CTSK	0.51115	-0.742936	0.291451
MCL1	0.82094	-0.0241736	0.0856886
ADAMTSL4	0.910535	-0.296771	0.0407036
EHD2	0.204852	0.990848	0.688561
RNGTT	0.83382	0.0499564	0.0789279
HOTAIR	0.302698	-0.398471	0.51899
ROCR	0.985012	-0.0757327	0.00655862
C2-AS1	0.898838	-0.754229	0.0463184
ATG101	0.486251	0.194987	0.313139
CLIC4	0.785144	-0.0329407	0.105051
CCPG1	0.0295631	-0.573432	1.52925
SLC16A4	0.619838	0.360315	0.207722
CRYM-AS1	0.676192	-0.645268	0.16993
SLC9A3R2	0.819767	-0.0477747	0.0863095
LDLRAD4	0.649447	-0.326335	0.187456
KCTD19	0.859368	0.159349	0.0658206
ZNF573	0.433374	0.298811	0.363137
CLDN4	0.495149	-1.38493	0.305264
UGT3A2	0.328398	0.593852	0.4836
FAM84B	1.12789e-05	-0.693759	4.94773
HOXC-AS1	0.222829	-0.645945	0.652028
CCL5	0.920072	0.59667	0.0361782
PHF3	0.652812	-0.0873725	0.185212
CEP70	0.339778	-0.25221	0.468804
ICA1L	0.761337	-0.113255	0.118423
PPM1L	0.989996	-0.00408681	0.00436666
CTLA4	0.92277	0.576584	0.0349067
NCAPH2	0.105601	-0.290745	0.976333
TOMM34	0.446652	0.114457	0.350031
BMP3	0.928134	0.199485	0.0323891
PRDM8	0.112835	-1.44395	0.947557
GRIK4	0.502086	0.963851	0.299222
MITF	0.313378	-0.325669	0.503931
ENTPD5	0.443157	-0.229119	0.353443
PLCD1	0.90477	0.126206	0.0434617
AASS	0.28046	0.545933	0.55213
APOBEC3C	0.0782483	-0.288617	1.10652
LYPLA2	0.00505839	0.579492	2.29599
REV3L-IT1	0.852527	0.578113	0.0692918
ELOA	0.0479208	0.318908	1.31948
HIST2H2BE	0.522197	-0.291178	0.282165
RALYL	0.92277	0.576579	0.0349064
ZBTB40	0.642258	0.129593	0.19229
AMER1	0.944255	0.0269133	0.0249106
ORC5	0.610229	0.102018	0.214507
DNAAF5	0.189897	0.191454	0.721482
SLC25A45	0.829727	-0.149312	0.0810645
RPL29	0.0113815	-0.189643	1.9438
HSPA8	0.366549	0.129644	0.435868
CENPJ	0.186828	-0.378439	0.728559
PARD3-AS1	0.931906	0.191962	0.0306279
PPP1R9A	0.294362	0.731635	0.531119
COG6	0.386461	-0.183551	0.412894
PLEKHB2	0.869965	0.0232767	0.0604981
BIRC6	0.446631	-0.132469	0.350051
NOL10	0.998389	0.000330829	0.000700215
TSR2	0.274878	0.185995	0.56086
PRDM13	0.331678	-0.393008	0.479283
CTBP1	0.611689	-0.0519681	0.21347
FBXL4	0.971381	0.00865267	0.0126106
CCNC	0.700913	0.0453698	0.154336
TPTEP2-CSNK1E	0.25016	0.150004	0.601783
FBP1	0.656733	1.05376	0.182611
MORF4L1	0.169935	0.0987393	0.769718
TNIK	0.232026	0.26957	0.634463
ZMYND8	0.657487	-0.0937488	0.182113
FAM114A2	0.795596	-0.0584593	0.0993073
FAM167A	0.586038	-0.634361	0.232074
SGK2	0.692294	-2.2123	0.159709
PCMT1	0.642959	-0.0408686	0.191817
DAB1	0.413393	-1.18906	0.383636
CCDC170	0.788436	-0.269561	0.103234
GRAMD2A	0.663571	-2.57414	0.178113
RHOT1	0.326219	-0.201335	0.48649
ZNF74	0.85176	-0.0392195	0.0696829
PPIL6	0.140894	-1.27176	0.851109
CHRD	0.69173	0.426423	0.160063
THPO	0.26553	2.57556	0.575887
P3H2	0.546953	0.763629	0.26205
PURPL	0.0178531	-1.38379	1.74829
PPP1R14D	0.439651	2.15281	0.356892
LSM14A	0.670127	0.0486748	0.173843
CPLANE1	0.184802	-0.505966	0.733294
FAR1	0.843544	-0.0266429	0.073892
HMBS	0.604389	0.0795203	0.218683
KMT5A	0.817052	0.0377643	0.0877501
OTUD6B-AS1	0.466979	0.147796	0.330703
DLX6	0.766451	0.125292	0.115516
PCDHGA6	0.41055	1.66474	0.386634
NOL8	0.999155	-0.000184888	0.000367285
IRAK4	0.839516	-0.0687794	0.0759711
CCDC151	0.577543	0.550653	0.238416
KCNG3	0.702622	-0.217468	0.153278
TIMM10	0.909532	0.0134356	0.0411822
CHPF	0.0467995	-0.44433	1.32976
ACSL3	0.906362	-0.0130694	0.0426983
BAG6	0.644283	0.0472818	0.190924
MRPS23	0.162852	0.164308	0.788208
LUC7L	0.268381	0.180568	0.571247
PRRC2A	0.225067	0.201268	0.647688
HSD11B1L	0.134182	-0.639952	0.872305
TERT	0.399124	-0.892738	0.398892
CHML	0.712073	0.0657978	0.147476
AMBN	0.704637	0.339526	0.152035
RPL39L	0.231223	-0.188532	0.635969
IKZF5	0.0879476	-0.301535	1.05578
SYNPO2	0.763087	0.661517	0.117426
RNF223	0.709433	-2.2114	0.149089
XIAP-AS1	0.894301	-0.755186	0.0485164
ASXL3	0.708264	-0.190899	0.149805
SLC25A52	0.441987	1.42817	0.35459
ACTL6A	0.913161	0.0182281	0.0394528
SYNGAP1-AS1	0.482945	1.58217	0.316102
AFG3L2	0.984911	0.00308858	0.00660295
PPIE	0.157044	0.242486	0.803978
SMAP2	0.320352	0.206247	0.494372
SS18	0.345853	-0.128913	0.461108
WHRN	0.337332	0.481224	0.471943
ZNF529-AS1	0.647933	0.488558	0.18847
ZNF219	0.953236	0.0238076	0.0207994
C12orf50	0.65815	2.57334	0.181675
CASP7	0.742543	0.0651694	0.129279
PPP1R36	0.504955	2.18277	0.296747
ARHGEF40	0.632279	-0.217977	0.199091
NSMF	0.1054	0.38061	0.977159
CEBPD	0.0238861	-1.16272	1.62185
KDM4B	0.395017	0.204847	0.403384
TICAM1	0.610422	-0.392946	0.21437
CCDC32	0.830632	-0.0680294	0.0805914
ATP2B1	0.239352	-0.178919	0.620964
UHRF1	0.644093	-0.0575509	0.191051
ORAI1	0.732042	-0.105202	0.135464
HOOK3	0.830945	-0.0342022	0.0804276
DHRS11	0.478695	0.194747	0.319941
LHX1	0.879703	0.089783	0.0556638
DGLUCY	0.659839	-0.192022	0.180562
RPH3A	0.663571	-2.57414	0.178113
ARHGAP11A	0.02507	0.411226	1.60085
CHAMP1	0.961191	0.0091089	0.0171904
INPP5F	0.46084	-0.240173	0.33645
GRM3	0.377461	1.32194	0.423128
CHPF2	0.115193	-0.339517	0.938576
APPL1	0.972708	-0.00511194	0.0120173
MUM1L1	0.328533	0.759378	0.483421
BACE1-AS	0.3457	-0.378996	0.461301
PRR29	0.709432	-2.2114	0.149089
C4B	0.989669	-0.0494855	0.00451019
RBPMS-AS1	0.953566	0.204149	0.0206491
HOXD8	0.281722	0.3734	0.550178
SLC6A14	0.787159	1.58225	0.103938
CREG2	0.542184	-2.22357	0.265854
SYF2	0.0736346	-0.270507	1.13292
RSRP1	0.0501618	-0.406516	1.29963
OSBP	0.577087	-0.0944634	0.238759
UBB	0.513507	0.03634	0.289454
CDK1	0.236231	0.107965	0.626664
STX8	0.764373	0.0689781	0.116695
DTX4	0.709432	-2.2114	0.149089
ATG2A	0.782397	0.0913277	0.106573
EHD1	0.784845	0.0590691	0.105216
ZNF488	0.762058	0.181581	0.118012
OGDHL	0.5055	-0.227436	0.296278
CCNT1	0.948734	0.0111586	0.0228557
PUS7L	0.171536	0.284813	0.765644
ATG3	0.77574	-0.0354189	0.110284
LBR	0.353074	-0.0852647	0.452135
RABL3	0.699457	0.0881121	0.155239
ADPRH	0.888506	-0.271256	0.0513398
EPHX1	0.198474	0.267939	0.702296
DHH	0.92277	0.576584	0.0349067
ZNF638	0.671661	0.0777001	0.17285
TARBP2	0.0078843	0.512032	2.10324
WNT8B	0.663571	-2.57414	0.178113
FAM186B	0.238836	-3.5594	0.621899
RDH5	0.843283	0.447918	0.0740264
PGM1	0.201608	-0.15232	0.695491
HUNK	0.192071	0.493855	0.716537
AGAP2	0.657725	-0.369458	0.181955
GABRA4	0.610632	-2.55201	0.21422
MTF1	0.771151	-0.0892546	0.11286
ZNF548	0.171098	0.919029	0.766755
PPIAL4A	0.21254	-3.82003	0.67256
APOA1	0.369182	-0.770138	0.43276
GCH1	0.314336	0.255139	0.502605
UTRN	0.459641	-0.190263	0.337581
ARAF	0.32751	-0.187965	0.484775
PTPRJ	0.951819	0.0245464	0.0214456
C11orf49	0.674475	0.0950425	0.171034
IL21-AS1	0.92277	0.576584	0.0349067
LARP1B	0.201515	-0.251473	0.695692
KLK8	0.461473	-0.866485	0.335853
ITGB3BP	0.367093	-0.0997909	0.435224
KPNA4	0.10021	0.238942	0.999089
ASIC2	0.709433	-2.2114	0.149089
MCM3AP-AS1	0.563804	-0.36255	0.248872
PALM2-AKAP2	0.695007	0.10513	0.158011
TRDN	0.920072	0.59667	0.0361781
ZNF407	0.874391	-0.0775464	0.0582945
ZNF142	0.830195	-0.0741759	0.08082
RSPH9	0.665325	1.19421	0.176966
TTC36	0.833273	-0.784768	0.0792129
PPARD	0.710881	0.116697	0.148203
MTRF1L	0.112793	0.3715	0.947717
EFCAB3	0.789467	1.56496	0.102666
COPS9	0.276719	0.0858901	0.557961
MIA2	0.639689	-0.126667	0.194031
RAPGEFL1	0.884609	-0.121534	0.0532489
PDK3	0.970458	0.0122393	0.0130232
HGD	0.92277	0.576584	0.0349067
DLG3-AS1	0.54215	2.18327	0.265881
C2orf16	0.909109	-0.111367	0.0413841
NR2F1	0.0299322	0.279926	1.52386
TCEANC2	0.266708	-0.204696	0.573964
CHRAC1	0.890034	0.0214052	0.0505936
ZNF221	0.941015	-0.132744	0.0264034
TMEM59	0.812641	0.0278117	0.0901013
TMBIM6	0.0112025	-0.151621	1.95068
NF1	0.136142	-0.264816	0.866008
ALKAL1	0.00316615	-0.656937	2.49947
TBX3	0.0395246	0.396961	1.40313
VKORC1L1	0.95198	-0.00857969	0.021372
ANXA6	0.342082	-0.14431	0.46587
GMFB	0.523896	0.0938675	0.280755
ZNF441	0.762542	-0.31124	0.117736
NATD1	0.839383	-0.0704196	0.0760399
TMEM87A	0.761982	0.06921	0.118055
DYNC1I2	0.0417864	0.302349	1.37896
NIPSNAP3B	0.875117	-0.271376	0.0579341
SYCE1L	0.131672	-0.799906	0.880506
ABCA1	0.109911	-1.51773	0.958959
HIST2H2AA3	0.954408	0.0159245	0.020266
HIST2H3C	0.746426	0.210564	0.127013
HIST2H2BF	0.529746	0.732859	0.275932
MRPL14	0.212358	0.128316	0.672931
GPR137C	0.522606	0.281082	0.281826
HBEGF	0.228435	-0.744079	0.641237
LYSMD2	0.856083	-0.0896335	0.067484
FGF7	0.439488	-1.7614	0.357053
SLC27A2	0.776697	-0.102998	0.109749
FBXW11	0.359367	-0.13311	0.444462
SPAG5	0.119002	0.261201	0.924444
SPINK8	0.709433	-2.2114	0.149089
MAP3K20-AS1	0.676094	1.22028	0.169993
HAUS7	0.106646	0.417204	0.972056
ARHGAP19	0.050916	0.379722	1.29315
LCAT	0.777625	-0.261692	0.10923
IL1R1	0.746965	0.406159	0.1267
COL21A1	0.403692	2.16266	0.39395
EIF2D	0.929023	0.0126506	0.0319737
KLHL31	0.478857	1.40592	0.319794
NLN	0.222401	0.218369	0.652864
CENPK	0.963916	-0.007592	0.0159607
POLH-AS1	0.780297	-0.284207	0.10774
ATP2C1	0.869325	-0.0277328	0.0608176
CCDC190	0.787159	1.58225	0.103938
DUS1L	0.823767	-0.0236571	0.0841958
CNBP	0.595287	0.0526839	0.225274
ZNF829	0.448011	0.428912	0.348711
FASN	0.227312	0.115238	0.643378
GPR173	0.663571	-2.57414	0.178113
HES1	0.355014	0.112841	0.449755
GAS6	0.716609	-0.15471	0.144718
PIGR	0.92277	0.576583	0.0349066
CCDC82	0.375609	-0.213639	0.425264
DDX53	0.663571	-2.57414	0.178113
FAM110C	0.346291	-3.03385	0.460559
SRRM2	0.346856	0.0829747	0.459851
ABCA3	0.351085	-0.240786	0.454588
EIF4E3	0.208284	-0.283117	0.681343
KCTD5	0.189867	0.224851	0.721551
CLSPN	0.0766912	0.715534	1.11525
TEKT2	0.866338	-0.197679	0.0623124
BBS10	0.782157	-0.0641152	0.106706
FIZ1	0.963033	0.0219379	0.0163589
CNOT4	0.743788	-0.0698486	0.128551
FAHD2A	0.891294	-0.0328918	0.0499792
KCNIP3	0.79547	0.200523	0.0993763
NKX2-2	0.852122	0.124051	0.0694981
RBCK1	0.446713	-0.151174	0.349971
TMX4	0.282338	-0.176644	0.54923
SARNP	0.664088	0.172614	0.177774
HSP90B1	8.85619e-50	-1.07102	49.0528
CFAP52	0.791562	-0.784989	0.101515
FAM96B	0.0908943	0.166354	1.04146
RRAD	0.87581	0.577456	0.0575903
HIST1H2AL	0.922771	0.576571	0.0349059
MAPK9	0.266627	-0.155286	0.574096
GK-IT1	0.92277	0.576583	0.0349066
COG7	0.930243	0.0219911	0.0314037
CDC27	0.322162	0.124114	0.491926
FAM126B	0.932927	0.0198176	0.0301523
GJD2	0.713908	-0.941582	0.146358
ZNF732	0.8886	0.577165	0.0512936
RNF150	0.0781407	-0.548488	1.10712
HCG25	0.852194	-0.281301	0.0694617
HIVEP1	0.640892	0.186289	0.193215
USP49	0.726954	0.137201	0.138493
TOP1	0.462286	0.0776442	0.335089
TMEM11	0.616093	0.0816129	0.210354
KRT17	0.358566	-1.06545	0.445431
MAP3K3	0.0660082	0.400649	1.1804
BHLHB9	0.446523	0.209213	0.350156
TAF12	0.0423304	0.33	1.37335
MGAT4B	0.178119	0.215575	0.74929
ENOX1	0.313452	-0.357646	0.503829
MRNIP	0.486699	0.177956	0.312739
RPL8	0.462987	-0.0420796	0.334431
JMJD7-PLA2G4B	0.293812	-0.512008	0.53193
DOK4	0.457667	0.390933	0.33945
ZBED6	0.92277	0.576584	0.0349067
GABARAPL2	0.110972	-0.143543	0.954788
ATF7IP	0.523677	0.174064	0.280936
PLEKHG5	0.656583	-0.320177	0.18271
NPIPB5	0.850854	-0.0535906	0.070145
IQGAP3	0.796032	0.0746817	0.0990696
NPAS2	0.570196	-0.280774	0.243976
KIRREL1	0.172486	-0.466539	0.763246
TMEM116	0.194149	-0.459769	0.711864
UCKL1	0.433078	-0.170037	0.363434
DDX27	0.393597	-0.136452	0.404948
RNF114	0.516607	0.0897089	0.28684
PMEPA1	0.41792	-0.29629	0.378907
STX16	0.0877541	-0.246208	1.05673
GGN	0.943069	0.194055	0.0254567
TRAF5	0.589356	-0.168135	0.229622
FUCA1	0.128059	-0.294342	0.892588
GEMIN5	0.122928	-0.279529	0.910349
LEMD2	0.924232	0.0213673	0.0342191
MRPL22	0.0336148	0.256501	1.47347
SOS1-IT1	0.789181	-0.239199	0.102823
ZBED1	0.292874	0.285515	0.533319
LRP4-AS1	0.923397	0.0787216	0.0346115
MVD	0.25437	0.300642	0.594534
TMEM189	0.573791	0.0893156	0.241246
ARAP2	0.702376	-0.246532	0.153431
FAM13B	0.437864	-0.190378	0.35866
ZNF280B	0.506176	0.184342	0.295698
ANKRD18B	0.582677	-0.171697	0.234572
ASCC1	0.318053	-0.209484	0.4975
PDS5B	0.0939004	0.351221	1.02733
ZNF92	0.236598	-0.245555	0.625989
TRIM50	0.92277	0.576584	0.0349067
EID1	0.477692	0.0670599	0.320852
FAM13A-AS1	0.647526	-0.514471	0.188743
KANSL1L	0.900881	0.0633876	0.0453328
PLPP3	0.870169	0.0492492	0.0603964
TBC1D8B	0.800316	-0.123976	0.0967384
VPS4A	0.0551829	0.255668	1.2582
WDR44	0.0412523	0.453115	1.38455
FXYD6	0.372871	-0.24307	0.428441
MAGEA2	0.354471	0.330714	0.450419
BRIP1	0.168285	0.312696	0.773956
RHOXF2	0.838454	-1.10697	0.076521
RIF1	0.947369	0.0105934	0.023481
ATP8A2	0.740931	0.477172	0.130222
MIS18BP1	0.390638	0.202095	0.408226
NRL	0.178921	-1.54759	0.747338
LYRM9	0.474748	-0.313123	0.323537
PTPMT1	0.388804	0.116823	0.41027
HS6ST1	0.21502	-0.271594	0.667521
SLC29A2	0.76314	0.0878385	0.117396
OR7D4	0.92277	0.576584	0.0349067
GJC3	0.76469	0.786351	0.116514
WWOX	0.864933	-0.0485879	0.0630175
TOM1L1	0.963776	0.007541	0.0160239
ARHGEF16	0.581425	-0.39098	0.235506
SESN2	0.0262708	-0.286367	1.58053
PRH1	0.859565	-0.199674	0.0657214
TRAF3IP2-AS1	0.117794	-0.676423	0.928878
ZMIZ2	0.30356	0.231437	0.517755
SMPDL3B	0.505813	-0.20052	0.29601
MARC2	0.189253	-0.391459	0.722957
PMS2	0.692337	0.192005	0.159683
CTTN	0.429162	-0.082496	0.367378
DHX29	0.462772	0.134671	0.334633
TRAM1L1	0.34864	0.595142	0.457623
TBC1D15	0.931929	-0.014116	0.0306173
ATP2B3	0.621517	-1.61473	0.206547
GJA3	0.710029	0.191646	0.148724
FTSJ1	0.988665	0.00240817	0.00495082
TBC1D3K	0.463035	1.05815	0.334386
BOP1	0.0342707	0.295649	1.46508
STYK1	0.19181	2.58218	0.71713
PLTP	0.32693	-0.253674	0.485545
ZNF807	0.789467	1.56496	0.102666
EPDR1	0.996843	0.00146956	0.00137323
F2R	0.7812	0.0617252	0.107238
TTC21A	0.691006	-0.729799	0.160518
CXCL17	0.783979	-1.06618	0.105695
RCN1	0.0515757	-0.232136	1.28755
ACTB	3.93299e-06	0.265918	5.40528
XRN2	0.497965	-0.0743193	0.302802
BTBD11	0.307957	-0.454756	0.51151
MAN1B1-DT	0.930164	0.0710946	0.0314403
ZDHHC6	0.581235	0.0947701	0.235648
C6orf48	1.69429e-05	-0.534618	4.77101
CD22	0.89618	-0.774314	0.0476046
FLOT2	0.85369	0.0285222	0.0686999
SDF2	0.984515	0.00397849	0.00677751
BAIAP2-DT	0.975309	-0.0125011	0.0108576
IFT43	0.882178	-0.0280303	0.0544436
HOXC4	0.20008	-0.248923	0.698796
ADM	0.816173	0.0907118	0.0882179
BTBD10	0.18121	-0.329134	0.741819
C17orf97	0.585275	0.39135	0.23264
ZKSCAN4	0.763582	-0.142632	0.117145
RGPD1	0.911601	0.59592	0.0401951
ACAP3	0.571226	-0.23249	0.243192
OGT	0.0296793	-0.293225	1.52755
ITGB1BP2	0.96653	-0.163205	0.0147847
ARPC5	0.00663771	0.278957	2.17798
STX11	0.858697	0.162094	0.0661602
PLXNA1	0.610303	0.110671	0.214455
DDX21	0.527979	-0.0460779	0.277384
BMS1	0.106033	0.22782	0.974561
STOX1	0.83358	-0.0939	0.0790528
RET	0.831688	-0.145447	0.0800398
PPP1R7	0.310491	0.122114	0.507951
PASK	0.758563	0.087019	0.120008
CTNND2	0.709433	-2.2114	0.149089
P2RY1	0.512577	-0.174004	0.29024
CPLANE2	0.0256718	-1.98608	1.59054
STRN4	0.810745	0.0411415	0.0911155
MT1X	0.901129	-0.0277047	0.0452128
FECH	0.717144	-0.0711481	0.144394
CASC1	0.578967	1.14832	0.237346
ABRACL	0.0265813	0.230773	1.57542
LRMP	0.846176	-0.767119	0.0725392
TPRA1	0.191662	-0.318673	0.717463
KLLN	0.36875	-0.825273	0.433268
SMIM29	0.93455	-0.0208237	0.0293976
NF2	0.128841	0.211808	0.889944
UBTD2	0.338244	0.155351	0.47077
TBC1D22A-AS1	0.522241	-1.66164	0.282129
CREBRF	0.953287	0.0181996	0.0207764
DCBLD1	0.862679	-0.0550749	0.0641507
VTI1B	0.393724	0.119821	0.404809
SFXN1	0.0240773	0.214214	1.61839
PSMA3	0.165803	0.118148	0.780409
PIGH	0.637945	-0.0833157	0.195216
POU5F1B	0.784876	1.59937	0.105199
AFAP1	0.265767	0.384738	0.5755
COA4	0.16883	0.138643	0.77255
OR4P4	0.92277	0.576584	0.0349067
DICER1	0.562636	0.0818221	0.249773
STX17-AS1	0.970057	-0.0452265	0.013203
TSR3	0.207351	0.164615	0.683293
CAPN12	0.720421	1.21046	0.142414
EXOC7	0.0808391	0.251401	1.09238
VPS35	0.390916	-0.0774851	0.407917
RNF144A-AS1	0.965923	-0.0923838	0.0150574
ATRNL1	0.26484	-0.444792	0.577017
BMP4	0.96874	0.0125683	0.0137929
ATP5S	0.0971278	-0.281217	1.01266
KCNQ1	0.558527	-0.640066	0.252956
MTMR12	0.672069	0.105631	0.172586
BAHD1	0.959867	0.0120232	0.0177888
PCSK7	0.4633	0.171225	0.334138
DISP2	0.906386	0.0765633	0.0426867
CDAN1	0.731904	0.155154	0.135546
ZNF316	0.989711	-0.00409411	0.00449145
HSF1	0.386189	-0.123635	0.4132
C6orf120	0.905346	-0.0221276	0.0431855
[truncated: 14,050 more rows]
