# Supplementary material for: MLL-AF4 and a murinized pSer-variant thereof are turning on the nucleolar stress pathway
Source: Cell Biosci. 2022 Apr 25;12:47. doi: 10.1186/s13578-022-00781-y (PMC9036721; doi:10.1186/s13578-022-00781-y)
Supplement: Supplementary file 10 — Additional file 10: A4M volcano. [file 13578_2022_781_MOESM10_ESM.xlsx]

## Sheet: Sheet1
gene symbol	pvalue	log2	minus log 10
MADD	0.798142	0.0697943	0.0979199
MAST2	0.705023	0.103607	0.151797
STRN	0.992353	0.00200057	0.00333378
PCLAF	0.927849	-0.00833908	0.0325228
ZNF32	0.208526	0.227508	0.68084
HIST1H1E	0.826512	0.229459	0.0827508
LURAP1L	0.97877	-0.0342104	0.00931926
PDHB	0.00209494	0.284019	2.67883
MRPL49	0.672297	0.0597022	0.172439
SCP2	0.771858	-0.0316901	0.112463
CDC42EP2	0.411704	0.28327	0.385415
RGPD6	0.525323	-0.190292	0.279573
PROX1-AS1	0.911483	0.227341	0.0402513
ATP6V1E2	0.78655	-0.123495	0.104273
KLHL17	0.863356	0.077706	0.0638101
NUDT3	0.474118	0.0898851	0.324114
KIF26B	0.244753	0.703957	0.611271
KLHL35	0.754893	-1.68477	0.122115
MYOCOS	0.368514	0.818623	0.433546
EIF4ENIF1	0.386626	0.194874	0.412709
TRIM46	0.10647	-1.75023	0.972771
ARPC2	0.238323	-0.0873958	0.622835
TSACC	0.904332	-0.0565951	0.0436719
CCT3	0.244981	0.0600637	0.610867
NFIA	0.320472	0.169142	0.49421
SLC39A9	0.24164	-0.204696	0.616831
BCLAF1	0.00155179	0.260664	2.80917
DIRAS3	0.550034	-0.768295	0.259611
VAMP8	0.918724	0.0276571	0.0368148
ACTR1B	0.418138	-0.141068	0.37868
RSF1	0.730086	0.0636313	0.136626
EMP2	0.841017	0.0297311	0.075195
KCTD11	0.115627	-1.27286	0.936943
SZRD1	0.405832	0.0995157	0.391654
LRP5	0.572172	-0.164144	0.242474
TBCE	0.285233	0.14807	0.544801
PDZD9	0.899398	-0.377446	0.046048
RTKN2	0.708918	-0.0663898	0.149404
PNMA8A	0.694331	-0.0643352	0.158433
FARP2	0.818133	0.0404787	0.0871761
KIAA1324L	0.858589	-0.0584783	0.0662148
SP8	0.435867	0.427514	0.360646
MIOS	0.390126	0.205147	0.408795
MOB1A	0.575682	-0.063086	0.239817
ADGRA1-AS1	0.855237	0.990657	0.0679136
MAML1	0.198125	0.229393	0.703061
TIAL1	0.986391	-0.00167672	0.00595111
ARMC3	0.842096	0.495785	0.0746386
MELK	0.652503	-0.0680603	0.185417
SLITRK5	0.159789	-0.229361	0.796453
MYL12A	0.556919	-0.0668336	0.254208
MYOM1	0.855237	0.990657	0.0679136
ZNF778	0.403953	0.26635	0.393669
CNOT7	0.294276	0.12975	0.531246
TMEM184B	0.812488	-0.0348491	0.0901831
MTOR	0.503713	-0.110641	0.297817
ZNF768	0.768085	0.0490598	0.114591
ZNF521	0.300536	0.732137	0.522104
ZNF81	0.972499	0.0221254	0.0121109
KLHDC1	0.597089	-0.956038	0.223961
DRAP1	0.821446	-0.0339677	0.0854211
LONRF3	0.825705	-0.14793	0.083175
MCMBP	0.799998	0.0263995	0.096911
FAM171A2	0.598165	0.166722	0.223179
KLHL20	0.0890545	-0.434048	1.05034
SCHIP1	0.825873	-0.06594	0.0830866
TOB2	0.257559	-0.195499	0.589124
SNAI1	0.546218	0.635407	0.262634
MOCS3	0.417101	0.247566	0.379759
STAU1	0.379058	0.096971	0.421295
CDH26	0.749033	0.620086	0.125499
PTGIS	0.80248	0.990662	0.0955656
ZNF444	0.735336	0.0713582	0.133514
SPTY2D1OS	0.872585	0.0739689	0.0591921
RPL26	0.00345512	-0.18062	2.46154
PAQR5	0.607487	-0.164698	0.216463
UBE2J2	0.60999	0.0777963	0.214678
TBC1D23	0.910258	-0.0259064	0.0408354
OAZ1	0.144669	0.090314	0.839625
HS3ST1	0.176125	1.72214	0.75418
CD99	0.778659	-0.0244232	0.108653
RPS27	0.0114594	-0.176367	1.94084
BET1L	0.103133	-0.319665	0.986604
RPL23A	0.020038	-0.132451	1.69815
G2E3	0.720093	-0.0638793	0.142611
ITM2C	0.27562	-0.173574	0.55969
USP37	0.630956	0.110093	0.200001
TTLL4	0.648277	0.107017	0.188239
HECTD1	0.901417	0.0202589	0.0450741
PEX3	0.126884	0.305994	0.896595
SERPINE2	0.916847	-0.0247086	0.037703
PSMG3-AS1	0.867317	0.0961995	0.0618224
EID2	0.685978	-0.0656934	0.16369
CRLF3	0.0167344	0.51208	1.77639
RNPEP	0.778588	-0.0339901	0.108692
DMRTA1	0.340152	-1.97555	0.468327
NUFIP1	0.546195	0.145169	0.262652
MARS2	0.0505115	0.438944	1.29661
DHRS13	0.87669	-0.0599616	0.0571538
CACNB3	0.871208	-0.0751102	0.0598783
KLRG2	0.758661	0.125568	0.119953
CKMT1B	0.157224	0.233145	0.803481
CATIP-AS2	0.855237	0.990657	0.0679136
ADAMTS6	0.167294	-1.81477	0.776519
KPNA6	0.26623	-0.105257	0.574743
TMEM80	0.872286	-0.0287423	0.059341
TEP1	0.807518	0.123449	0.0928475
SIX5	0.986637	0.0057186	0.00584268
TOB1	0.329407	0.139593	0.482267
ZFAND4	0.0768048	0.766562	1.11461
ABI1	0.598732	0.0853234	0.222767
YME1L1	0.537914	-0.0571175	0.269287
NOTCH2NL	0.359629	-0.697593	0.444145
ZNF536	0.417069	-0.380791	0.379792
KISS1R	0.277712	-1.98078	0.556405
ARID3A	0.0603513	-0.300873	1.21931
EPAS1	0.607637	-0.176043	0.216356
STRC	0.519722	1.87566	0.284229
ANKRD20A3	0.91573	0.144653	0.0382324
MSRB3	0.546106	-0.172361	0.262723
VWA8-AS1	0.662003	-1.62514	0.17914
MTCH1	0.00773326	0.26706	2.11164
NRM	0.258465	-0.316064	0.587598
PPP1R3E	0.0631556	-0.652459	1.19959
YBX3	0.611802	-0.0343906	0.213389
MAP3K10	0.500649	0.493327	0.300467
NPAS1	0.37122	-0.455057	0.430369
GMFG	0.456775	-1.05044	0.340297
TENM1	0.262364	-0.522665	0.581096
PAUPAR	0.0596985	-1.8245	1.22404
FAM215B	0.622676	0.431604	0.205738
HPS5	0.107522	0.493646	0.968504
RANBP1	0.000921838	0.194605	3.03535
SPIRE1	0.955688	0.0146775	0.0196839
BTBD1	0.238364	0.173919	0.62276
LBHD1	0.340377	0.126303	0.468039
HSD17B10	0.0383692	0.199522	1.41602
AK1	0.254365	0.191883	0.594542
SMC1A	0.816563	0.0190506	0.0880101
GNAT2	0.770578	-1.32501	0.113183
PRPF38B	0.670454	0.0563667	0.173631
GSTM1	0.58538	-0.150704	0.232562
BCL2L2	0.279582	0.292596	0.553492
TUBG2	0.519869	0.301784	0.284106
ZCWPW1	0.404306	-0.662628	0.39329
AP2S1	0.985709	-0.00164101	0.0062511
ITGB8	0.978168	0.0327671	0.0095865
PON2	0.322307	0.178673	0.49173
COPZ1	0.820555	-0.0205635	0.0858921
HBP1	0.34712	-0.24771	0.459521
GEMIN7	0.336109	0.180571	0.47352
SEMA3B	0.97063	0.0447869	0.0129464
SMPD2	0.482949	-0.295254	0.316098
RPL31	0.00086416	-0.188032	3.06341
ZNF343	0.221077	0.477008	0.655457
MAB21L1	0.219296	-1.01345	0.65897
EMX1	0.5728	-0.347528	0.241997
YOD1	0.00825085	0.456237	2.0835
CHM	0.297313	-0.228516	0.526786
SMYD5	0.288646	0.314982	0.539634
RAB11FIP5	0.103926	-0.474124	0.983274
DYSF	0.558166	-1.27067	0.253237
CCDC142	0.933071	0.0471124	0.0300851
EBP	0.239204	-0.142997	0.621232
SLC7A11-AS1	0.855237	0.990657	0.0679136
NCBP2	0.0164138	0.320915	1.78479
HDLBP	0.000591382	-0.282445	3.22813
MMP25-AS1	0.433354	0.354355	0.363157
MEGF6	0.473453	-1.96891	0.324723
SMIM2-AS1	0.605949	-0.41611	0.217564
MIS18A-AS1	0.346348	-1.20362	0.460487
AURKC	0.86066	-0.668345	0.0651685
CGB1	0.646384	-2.44689	0.189509
AZIN2	0.72721	0.222947	0.13834
ANO7	0.0623149	1.43963	1.20541
GRIK2	0.807128	-1.32203	0.0930577
GJB7	0.892386	-0.380804	0.0494472
CGRRF1	0.0972126	-0.413815	1.01228
FAM76B	0.215005	0.327101	0.667551
KRTAP9-6	0.855237	0.990657	0.0679136
DPY30	0.376485	0.0926982	0.424252
PLEKHB1	0.352255	-0.337816	0.453142
EP300	0.0299009	-0.37323	1.52432
L3MBTL2	0.272644	0.19906	0.564405
FAM72A	0.265203	0.253423	0.576422
CACNA1H	0.572134	-0.273144	0.242503
SLC22A4	0.657535	1.11005	0.182081
CSNK1G3	0.849776	-0.0325231	0.0706957
AGPAT4	5.7158e-05	-0.987993	4.24292
LRRC37B	0.862502	0.0636003	0.0642399
MTHFS	0.224261	-0.180665	0.649247
MIXL1	0.703408	-0.463121	0.152793
BCL7B	0.5925	0.0905727	0.227311
YKT6	0.550564	0.0837855	0.259192
LMO7-AS1	0.805464	0.340595	0.093954
TBL2	0.512193	-0.110727	0.290566
CHN2	0.550236	0.29664	0.259451
CLEC4F	0.694967	-0.560692	0.158036
TTC13	0.347359	0.208993	0.459221
NQO2	0.485941	0.135191	0.313416
GALNT2	0.172515	0.161246	0.763172
PEX6	0.438342	0.567503	0.358187
TRIM68	0.279145	0.436294	0.55417
POMT2	0.261495	0.292543	0.582537
PSME2	0.783813	-0.0493601	0.105787
CYBC1	0.0916996	0.405107	1.03763
PFAS	0.321137	0.138083	0.49331
HYI	0.197628	-0.357394	0.704152
IRF2	0.248892	-0.538221	0.603988
MOBP	0.855238	0.990648	0.0679129
PFKFB4	0.937823	-0.0394805	0.0278791
PQLC2	0.44789	-0.184686	0.348829
AP1S3	0.81936	-0.0837455	0.0865253
MAMDC2-AS1	0.934568	-0.208805	0.029389
ANAPC1	0.777872	0.0541038	0.109092
WEE2-AS1	0.936303	0.0987171	0.0285835
PDIA3	8.52116e-06	-0.517011	5.0695
PLCG1-AS1	0.767399	0.99066	0.114979
WT1-AS	0.502416	1.03282	0.298937
CDC25A	0.982528	0.0026296	0.00765523
PRR36	0.212493	-0.886609	0.672656
EMC6	0.238407	0.135028	0.62268
RPS28	0.00101921	-0.199595	2.99174
TAF1L	0.75489	-1.68479	0.122116
ACO1	0.49052	0.133079	0.309343
ARNTL2-AS1	0.807129	-1.32203	0.0930573
MARCH8	0.506914	0.186709	0.295065
ADK	0.248719	-0.154287	0.604292
SYN1	0.897893	-0.148686	0.0467754
PSMB4	0.745039	0.0186772	0.127821
SSBP4	0.833117	0.0453809	0.0792938
GDF15	0.0517628	-1.29006	1.28598
PGPEP1	0.841727	0.0666777	0.074829
MED30	0.113606	0.364091	0.944597
RAD21	0.29854	0.0969967	0.524997
PEX2	0.551607	0.125464	0.25837
LAMC2	0.905303	0.145202	0.0432059
SYNJ1	0.337473	-0.265352	0.471761
LARP1	0.466089	-0.056301	0.331531
PAXBP1	0.0614867	0.364639	1.21122
QPCTL	0.394955	-0.338957	0.403453
ADH1B	0.807129	-1.32203	0.0930573
SSUH2	0.858712	-0.59985	0.0661525
PHLPP1	0.683249	-0.128656	0.165421
VPS16	0.866201	-0.0479043	0.0623812
ABCB4	0.396637	-1.58009	0.401607
FLT4	0.654084	0.117294	0.184367
CCDC58	0.128002	0.188773	0.892783
C1orf146	0.875461	-0.134574	0.057763
CATSPER1	0.754893	-1.68477	0.122115
TBC1D3I	0.98338	0.0357065	0.00727861
HLA-DPA1	0.11484	-0.474845	0.939908
GCNT4	0.0591842	3.20517	1.22779
FUT2	0.318777	-1.64445	0.496513
EFCAB5	0.77558	0.458652	0.110373
ZNF251	0.971811	0.0176843	0.0124183
SVIP	0.247035	0.147166	0.607242
ANKRD16	0.49985	0.241666	0.30116
MAN1A2	0.00967271	-0.423748	2.01445
MIER1	0.81259	0.034435	0.0901285
TSNARE1	0.512183	0.546401	0.290575
XKR6	0.532585	-0.37355	0.273611
ARL14	0.576362	1.8645	0.239305
RPRML	0.338302	-0.331741	0.470695
MCPH1	0.846645	-0.0589915	0.0722988
LYAR	0.400116	0.103387	0.397814
JSRP1	0.419137	0.821534	0.377644
MIDN	0.410654	-0.121248	0.386524
PCDHGA11	0.522629	-0.891436	0.281807
HDHD5	0.342614	0.124149	0.465195
HADHA	0.354467	-0.0958478	0.450425
PSMB9	0.345529	-1.13215	0.461516
SORBS1	0.133852	-0.815678	0.873374
SCARNA22	0.0152699	1.04244	1.81616
EAF1-AS1	0.94507	-0.120423	0.0245358
MAGED4B	0.968185	-0.00890375	0.0140416
KAAG1	0.730512	1.85993	0.136372
WDR31	0.518619	0.573828	0.285151
RNF128	0.811959	0.0690752	0.0904658
BEX2	0.0283391	-0.275208	1.54761
MORC4	0.0321206	-0.379624	1.49322
POLE3	0.0664802	0.175417	1.17731
PLA2G12B	0.607832	-2.72806	0.216216
PDK4	0.666776	-0.438948	0.17602
CTDSP1	0.233155	0.272169	0.632355
PDZD4	0.111277	-0.986819	0.953595
CREB5	0.80798	0.0432403	0.0925996
CES3	0.521558	0.31865	0.282697
KSR1	0.090033	0.694938	1.0456
HMGA1	0.724842	-0.0289292	0.139757
FGFR2	0.284727	-0.25425	0.545572
PARP14	0.637929	-2.11803	0.195227
DHX8	0.60897	-0.0923881	0.215404
MEF2D	0.141994	-0.383703	0.847731
CCDC183	0.770945	-0.204443	0.112977
SLC35C2	0.838666	-0.0429949	0.0764108
CDKN2B	0.925207	0.0255574	0.033761
CDKN2A	0.77972	0.0182155	0.108061
AMMECR1	0.549025	0.102413	0.260408
CHRDL1	0.286679	1.29484	0.542605
PLD6	0.786434	0.0600048	0.104338
HBZ	0.402173	-1.35474	0.395587
PNPLA7	0.961944	-0.0913969	0.0168504
DNTTIP2	0.49486	0.0912672	0.305518
SUB1	0.231855	0.0769917	0.634784
GOLPH3	0.773299	-0.0446227	0.111653
FMO4	0.791533	-0.185704	0.101531
MED14OS	0.896042	0.136666	0.0476716
SKIDA1	0.135268	0.550424	0.868806
SPAG4	0.600172	0.459444	0.221724
HIST1H2BC	0.479739	-0.712566	0.318995
SDHA	0.529222	0.0827539	0.276362
NPIPB12	0.196569	0.494081	0.706484
RPL6	0.0300477	-0.113285	1.52219
SNX5	0.517892	-0.0562911	0.285761
ORAI3	0.372552	-0.300075	0.428814
TRABD2B	0.927405	0.0656243	0.0327304
CDK18	0.0823759	-0.55482	1.0842
GPR89A	0.140889	-0.303371	0.851123
FGF8	0.570328	-1.54251	0.243875
NPM3	0.0356814	0.22677	1.44756
FBXO43	0.855238	0.990652	0.0679132
SUPV3L1	0.698393	0.0622337	0.1559
FAM122C	0.716933	-0.165956	0.144521
FAM122B	0.112441	0.222773	0.949075
LACTB	0.557025	-0.159636	0.254125
CORO2B	0.266255	2.01314	0.574702
ABCA7	0.462904	-0.442829	0.334509
NLRP2	0.855237	0.990657	0.0679136
ARHGEF1	0.980802	0.00745277	0.00841885
XAB2	0.767895	-0.119669	0.114698
TOR1AIP1	0.691242	0.064438	0.16037
RGS16	0.142481	-0.388804	0.846244
ROPN1	0.855237	0.990657	0.0679136
THAP9	0.838684	0.090374	0.0764018
TSPYL1	0.00738796	0.231496	2.13148
RNF187	0.117658	0.131194	0.92938
MAK	0.390419	-0.705209	0.408469
RSPH4A	0.431831	1.41705	0.364686
RWDD1	0.38643	0.0819909	0.412929
FOXP1-AS1	0.754893	-1.68477	0.122115
CFAP54	0.185095	2.28981	0.732606
FUNDC1	0.652768	0.0668968	0.185241
GSDMA	0.855237	0.990657	0.0679136
SCAMP5	0.42837	-0.243361	0.368181
SUPT7L	0.458377	-0.117179	0.338777
SPIN2A	0.660365	0.369056	0.180216
NTPCR	0.6493	-0.0504083	0.187554
ABCB10	0.0550398	-0.24276	1.25932
COG2	0.0771022	0.299355	1.11293
CAPN9	0.55694	1.87001	0.254192
KDM6A	0.718391	0.0846195	0.143639
ADGRA3	0.447772	0.224419	0.348943
EME2	0.985054	0.00864095	0.00653987
COMTD1	0.737684	0.0556002	0.13213
MR1	0.992291	0.00335403	0.00336092
PTRH1	0.672413	0.150168	0.172364
PARP11	0.626185	0.164824	0.203297
PNLIPRP1	0.757205	-1.32626	0.120787
PPP1R32	0.466403	-1.33181	0.331238
ZNF48	0.886727	-0.0315377	0.0522101
MTFR1	0.920131	-0.0158794	0.0361504
KCNIP4	0.742465	0.438749	0.129324
SPTLC1	0.67519	-0.0627318	0.170574
NFATC2	0.928339	0.204253	0.0322932
RIMS4	0.0330782	0.667704	1.48046
MAGEA12	0.882778	0.344215	0.0541485
VEGFA	0.634954	-0.0881949	0.197258
JMJD6	0.049916	0.327551	1.30176
GNPTG	0.551547	-0.127966	0.258417
SENP7	0.607014	-0.172585	0.216802
DDOST	0.000421577	-0.305461	3.37512
COG5	0.188482	-0.324451	0.724729
MYOZ3	0.855238	0.990652	0.0679132
DIRC2	0.829121	-0.0678979	0.081382
TCF4-AS2	0.855238	0.990652	0.0679132
SCG3	0.386689	-0.830444	0.412638
GABRA3	0.807129	-1.32203	0.0930573
SOX21	0.929328	0.051604	0.0318308
RNF41	0.807143	0.0489451	0.0930498
SLC2A4	0.42696	-0.632885	0.369613
TRIM49	0.75489	-1.68479	0.122116
TMEM129	0.98106	0.00467943	0.00830427
SPRY3	0.572252	0.780715	0.242412
PPIC	0.0117426	-0.364068	1.93023
SLC28A3	0.855237	0.990657	0.0679136
NUP214	0.19896	-0.258843	0.701233
FAM78A	0.909598	0.066411	0.0411504
GSAP	0.867192	-0.575906	0.0618848
RRBP1	0.11771	-0.314178	0.929185
FBXO48	0.419025	0.315689	0.37776
UQCC3	0.567762	-0.0861358	0.245833
ZNF155	0.722084	0.288396	0.141412
NFIX	0.510021	0.232337	0.292412
CEP97	0.109931	-0.437085	0.958881
TSFM	0.167912	0.171118	0.774918
SEMA6B	0.0135776	-2.73172	1.86718
DHDH	0.17438	-1.48504	0.758502
NUCB1	0.0495611	-0.319159	1.30486
TULP2	0.36762	1.27071	0.434601
TWF2	0.0220734	-0.468589	1.65613
ZNHIT1	0.283131	-0.12875	0.548012
CLDN15	0.989071	-0.00500422	0.00477266
IRX3	0.85738	-0.0503127	0.0668266
EIF4EBP1	0.374909	-0.0816521	0.426074
P2RX2	0.636176	-1.34212	0.196423
VTRNA1-3	0.455195	0.45777	0.341803
MXD4	0.673531	0.060703	0.171643
ABHD2	0.0562563	0.345358	1.24983
WDR93	0.711675	-0.751896	0.147718
FANCI	0.807908	-0.0254058	0.0926383
POLG	0.621521	0.0863786	0.206544
ACSF2	0.483508	-0.239269	0.315596
FAM102A	0.225462	0.488175	0.646926
TMEM92	0.503394	-1.20448	0.298092
PIP5KL1	0.550046	0.880306	0.259601
HPRT1	0.664103	0.0312355	0.177764
SAMD14	0.674816	-0.51552	0.170815
EIF1B-AS1	0.328882	-1.46896	0.482959
PLK1	0.0745393	0.200233	1.12761
RNU6-2	0.621723	-0.352846	0.206403
CLPX	0.215277	0.235103	0.667002
YY1AP1	0.6888	0.0772389	0.161907
KBTBD8	0.161636	0.52363	0.791463
FAM19A4	0.637775	1.0904	0.195333
EOGT	0.957617	0.0187227	0.0188083
IST1	0.663535	0.0630242	0.178136
RC3H2	0.0809441	0.229114	1.09181
INKA2-AS1	0.214027	-1.1442	0.669531
CGNL1	0.645503	0.397446	0.190102
DENND5A	0.301925	-0.175901	0.520101
MYADM	0.0928575	-0.411846	1.03218
VAX1	0.740715	0.203771	0.130349
ADD3	0.921755	-0.0154142	0.0353847
CHIC1	0.552872	0.266035	0.257375
DENND4C	0.0527527	-0.558691	1.27776
IGFBPL1	0.848066	-0.637992	0.0715704
CLCN3	0.399652	0.142487	0.398318
BAZ2B	0.323948	-0.254713	0.489524
YEATS2-AS1	0.797475	-1.32276	0.0982832
GRK3	0.987135	-0.00390708	0.00562362
SLC39A8	0.899946	-0.0210628	0.0457837
ENPP4	0.216852	-0.3029	0.663836
IFNGR2	0.995913	0.000709727	0.00177846
SLC25A16	0.0320475	0.548817	1.49421
SHLD3	0.719221	0.16631	0.143137
LOXL1	0.74139	-0.175743	0.129954
ANKRD29	0.959212	0.0264648	0.0180853
CCDC181	0.977586	-0.00774984	0.00984497
JAKMIP1	0.469279	-0.498682	0.328569
STAG3	0.543207	-1.27995	0.265035
CLVS2	0.269037	-0.896359	0.570188
SLC10A7	0.0848113	-0.602331	1.07155
C16orf87	0.325039	-0.155893	0.488065
TBC1D32	0.296458	0.309705	0.528037
MFAP3	0.340616	0.685078	0.467735
ELOVL6	0.606496	0.101328	0.217172
PFKFB3	0.595714	0.10277	0.224962
TRA2A	0.0076704	0.24788	2.11518
ZNF627	0.394079	-0.362401	0.404417
ZNF789	0.9236	0.0387441	0.034516
WDHD1	0.535964	0.115762	0.270864
SEMA3C	0.3697	0.275147	0.43215
UBE2Q1	0.293754	0.117651	0.532016
IL6R	0.830629	-0.172161	0.0805931
ADAR	0.456359	0.0744208	0.340693
ARPC5L	0.19487	-0.177595	0.710256
MRPS18A	0.345683	0.158167	0.461322
SART1	0.875079	-0.0249825	0.0579528
NAPA	0.941407	-0.361728	0.0262227
CDC37	0.323815	0.0864729	0.489704
RABAC1	0.310519	-0.135226	0.507912
GFPT2	0.433875	0.291814	0.362635
SLC19A3	0.564615	1.01676	0.248248
SYNGR2	0.599558	0.0597008	0.222169
NUP210	0.989515	-0.00198095	0.00457768
SIPA1L2	0.947147	-0.0207742	0.0235824
CACNG7	0.697802	-1.65093	0.156268
CCDC146	0.842017	-0.191448	0.0746792
LGALS3	0.230336	-0.678297	0.637638
UBQLN2	0.659566	-0.0610693	0.180742
RILPL1	0.792128	0.0868409	0.101204
CMTM1	0.378686	-0.969413	0.421721
TXLNA	0.266441	0.134829	0.574399
ARHGEF33	0.855238	0.990652	0.0679132
MTBP	0.555159	0.210662	0.255582
SNTB1	0.246224	-0.536155	0.60867
RNU4ATAC	0.679759	0.350056	0.167645
INPP5E	0.1103	0.387736	0.957425
MNAT1	0.192562	-0.192363	0.715428
MID1	0.262113	-0.124851	0.581512
CYP2C8	0.855237	0.990657	0.0679136
MFSD13A	0.957369	0.0134427	0.0189204
CBWD1	0.0245153	0.303405	1.61056
MYOF	0.649472	0.990663	0.18744
PTPRG	0.539182	0.157717	0.268265
ANKRD42	0.97403	0.0109208	0.0114278
PDLIM7	0.440722	-0.193253	0.355836
SRP72	0.443595	-0.0776464	0.353013
IL18BP	0.936792	0.108496	0.0283566
CNP	0.807248	-0.031231	0.0929932
CD3EAP	0.431193	-0.147283	0.365328
MNX1-AS2	0.932217	-0.0846479	0.030483
RAP1A	0.928999	0.0113392	0.0319845
MRPS30	0.628089	-0.067291	0.201979
GATD3B	0.524258	0.100116	0.280455
NNT	0.581369	0.0765615	0.235548
HDAC1	0.0120215	0.197852	1.92004
C1GALT1C1L	0.819071	0.229208	0.0866785
MADCAM1	0.790376	0.99066	0.102166
ANK3	0.495357	0.171537	0.305082
PALM	0.80679	0.0780611	0.0932397
GADD45B	0.949726	-0.0245397	0.0224015
SLC7A9	0.59455	-1.75182	0.225812
BUD31	0.508858	0.0763552	0.293403
PDAP1	0.606199	0.0575121	0.217385
ALDH3A2	0.454329	0.102167	0.34263
PTCD1	0.279417	0.256301	0.553747
STRADA	0.0462429	3.89356	1.33495
CD59	0.000647233	0.438559	3.18894
SNHG7	0.000676136	-0.37995	3.16997
C7orf31	0.802984	-0.101672	0.095293
FALEC	0.583119	0.913184	0.234243
SYTL1	0.830129	-0.170789	0.0808547
RARS	0.069405	0.186698	1.15861
WWC1	0.951352	0.0185927	0.0216586
SRGAP2	0.194948	0.247073	0.710082
H2AFY	0.82688	0.0184453	0.0825576
SCN9A	0.52233	-0.351541	0.282055
RASSF6	0.862751	-0.364922	0.0641144
SDC2	0.0652907	-0.228218	1.18515
UHRF1BP1L	0.875218	-0.0474611	0.057884
NOP2	0.307901	0.320427	0.511589
GAPDH	0.945606	0.00352926	0.0242896
CHD4	0.159365	-0.132184	0.797608
SLC47A1	0.880309	-0.0391336	0.0553647
KPNA1	0.754159	0.0497349	0.122537
RPGR	0.311235	0.342156	0.506911
CHIC2	0.320805	0.26959	0.493758
BRCA1	0.70643	0.0537333	0.150931
ORAOV1	0.392671	0.244209	0.405971
ALDH1A3	0.427173	-0.471507	0.369396
RNF185	0.504364	-0.159371	0.297256
SHISAL1	0.792878	-0.160547	0.100794
CDR1	0.754893	-1.68477	0.122115
BOLA3	0.15866	0.126018	0.799531
CDC42EP3	0.670643	0.120856	0.173509
ZSCAN21	0.386278	-0.276541	0.4131
YBEY	0.0405454	-0.668646	1.39206
PLSCR4	0.886158	-0.11299	0.0524889
SATL1	0.198969	-2.3568	0.701216
TCTE3	0.506548	-0.315683	0.295379
UBE2G2	0.004134	0.287951	2.38363
SMIM10	0.941515	0.0178929	0.0261728
TMEFF1	0.430433	-0.165237	0.366095
SETD2	0.913775	0.0224858	0.0391607
REEP4	0.476188	-0.161508	0.322222
TMEM30A	0.0196768	-0.31654	1.70604
COX7A2	0.284288	0.058202	0.546241
GMDS	0.485575	-0.122037	0.313743
WRB	0.385564	0.12525	0.413903
TNRC18	0.459327	-0.219958	0.337878
BLMH	0.694091	-0.0526578	0.158584
SLC6A4	0.782127	0.990659	0.106723
BBOX1-AS1	0.931199	-0.0550413	0.0309573
GALNT12	0.578997	-0.178885	0.237324
NTN4	0.097528	2.64553	1.01087
JKAMP	0.0735148	0.303847	1.13363
ENPP3	0.634839	0.978887	0.197336
ZNF35	0.842301	-0.125486	0.0745326
ABCA6	0.837224	-0.604878	0.0771584
ABCA5	0.895209	0.0365936	0.0480757
MYLPF	0.661399	0.260082	0.179537
WASHC5	0.926403	-0.0155529	0.0332
RSBN1L	0.523838	-0.0968189	0.280803
RPP25L	0.655717	-0.0613967	0.183284
ATP5MF	0.0161422	0.147339	1.79204
SETD6	0.661177	0.0869682	0.179682
SPTSSA	0.809161	0.034186	0.0919651
PABPC4	0.119531	0.132393	0.92252
LAMA1	0.0533583	-0.669255	1.2728
LRCH4	0.663497	-0.147882	0.178161
TNFAIP8L3	0.40196	1.7023	0.395817
ZNRF3	0.829605	-0.049794	0.0811284
ADPRHL2	0.130584	-0.296463	0.884109
ARSD	0.677121	1.86684	0.169333
PNPLA4	0.297398	-0.43405	0.526662
MPPE1	0.267879	-0.348387	0.572062
KIAA0895	0.415565	0.231338	0.381361
UBR1	0.883436	0.040231	0.0538247
SNAPC4	0.613396	-0.138496	0.212259
TCHH	0.65712	0.990665	0.182356
VCPKMT	0.899101	-0.0401001	0.0461916
SOS2	0.266912	-0.359402	0.573632
DAD1	0.76747	-0.0225228	0.114939
SEC23IP	0.289171	0.140598	0.538845
SPATA20	0.595872	-0.214428	0.224847
CACNA1G	0.786707	-0.449511	0.104187
SYCE3	0.994756	0.0101768	0.00228344
TOGARAM1	0.831603	-0.0818245	0.080084
SLC9B1	0.834247	-0.397705	0.0787055
EVL	0.97586	0.00529014	0.0106123
H2AFZ	0.0850822	0.0919148	1.07016
DNAJB14	0.555464	-0.136495	0.255344
MRPL33	0.14434	0.147474	0.840613
SNHG3	0.000773108	0.287398	3.11176
GLMP	0.718006	-0.0554036	0.143872
BDH2	0.801137	-0.0598779	0.0962934
PICK1	0.602393	-0.11784	0.22012
DEPDC5	0.864854	0.0598607	0.063057
GNA13	0.313064	0.158112	0.504367
TTC28	0.81886	-0.0447249	0.0867904
HOXB8	0.118903	0.432672	0.924806
SNRPD2	0.0554416	0.1174	1.25616
OPA3	0.0805075	0.418203	1.09416
FOSB	0.533535	-0.895624	0.272837
EML2	0.56485	-0.192065	0.248067
RTN2	0.253427	-0.405404	0.596147
TMC4	0.745797	-0.816494	0.127379
PEPD	0.895578	-0.0173743	0.0478966
CYP2S1	0.491561	-0.472875	0.308423
AXL	0.254766	-1.17037	0.593859
NFKBID	0.189709	0.908597	0.721912
URB1-AS1	0.527754	0.180435	0.277569
ACY1	0.960955	-0.0916751	0.0172969
SIRT1	0.898491	0.0217583	0.0464863
MOGS	0.803175	-0.0451107	0.0951897
GEMIN8	0.337619	0.29922	0.471573
C8orf31	0.539848	0.49697	0.267728
DLGAP1-AS1	0.505687	1.37299	0.296118
AVIL	0.772139	0.454279	0.112304
ZNF655	0.218641	0.214447	0.660269
ROR1-AS1	0.755928	0.864688	0.12152
CASC11	0.855237	0.990657	0.0679136
MASP1	0.855237	0.990657	0.0679136
RNU5D-1	0.698021	0.990661	0.156132
HSFX4	0.520636	1.87564	0.283466
CIB2	0.490597	-0.148384	0.309275
WASF2	0.658773	0.0612676	0.181264
PIGV	0.046668	0.795204	1.33098
HOXD3	0.911483	-0.146026	0.0402514
CHN1	0.69332	-0.108562	0.159066
MTX2	0.891419	0.0202052	0.0499182
PDE11A	0.491974	-0.608943	0.308058
GTF3A	0.748789	-0.031244	0.125641
RASL11A	0.83745	-0.114524	0.0770412
GMPPB	0.0015207	-0.68538	2.81796
STEAP2	0.393812	-0.329264	0.404711
ZNF622	0.0349348	-0.474593	1.45674
NEO1	0.848656	-0.0431066	0.0712682
SNX33	0.607586	-0.233811	0.216392
KLHL15	0.0936372	-0.329805	1.02855
FBXO45	0.227598	0.28826	0.642832
SPERT	0.855238	0.990652	0.0679132
KCNB1	0.44206	1.41042	0.354519
CUL7	0.586262	0.20491	0.231908
ZNF260	0.311008	0.288855	0.507229
TRIM36-IT1	0.82099	-0.532731	0.0856621
NCAN	0.400613	1.87703	0.397276
PIGS	0.925216	-0.0111188	0.033757
TSEN2	0.665752	-0.114339	0.176687
ZDHHC1	0.504968	0.583467	0.296737
TPPP3	0.908352	-0.0995571	0.041746
ADPRM	0.0859586	-0.687061	1.06571
SLC35B1	0.00021337	-0.414171	3.67087
CYSTM1	0.832626	-0.0310135	0.07955
ZNF584	0.920651	0.0399804	0.0359049
ENDOU	0.782118	-1.324	0.106728
SLC26A10	0.474552	0.77965	0.323716
ACVR1B	0.16198	-0.310829	0.79054
OS9	0.00790599	-0.312011	2.10204
IGF2	0.395011	-0.525198	0.40339
LSG1	0.420225	0.22351	0.376518
SPHAR	0.249915	0.271184	0.602207
VWA8	0.864429	-0.0433116	0.0632708
RGCC	0.960488	0.0199421	0.017508
ZXDB	0.24888	0.3621	0.60401
IRF9	0.71203	0.316773	0.147502
ZNF568	0.390593	0.688313	0.408276
KLHL5	0.777477	0.0801043	0.109312
ST18	0.728824	1.87178	0.137377
FAM149A	0.35592	0.661246	0.448647
EFHB	0.612789	-1.05533	0.212689
SNTG1	0.754893	-1.68477	0.122115
IFT80	0.454275	0.183622	0.342681
SLC2A8	0.512209	0.154133	0.290553
STXBP1	0.637836	-0.100559	0.195291
ANGPTL2	0.855238	0.990652	0.0679132
IK	0.420547	0.101727	0.376186
MOB3A	0.909169	-0.0401435	0.0413554
KRCC1	0.20007	-0.436748	0.698818
RAB5C	0.861006	0.0231979	0.0649937
KAT2A	0.140143	0.255939	0.853427
DHX58	0.856179	-0.401153	0.0674353
PM20D2	0.696384	-0.0437884	0.157151
RARS2	0.90008	-0.0268376	0.0457189
HAGH	0.820825	-0.0350489	0.0857495
ANP32C	0.786822	-0.485701	0.104123
ZNRD1	0.116105	0.247028	0.935151
EEFSEC	0.975313	-0.0097786	0.0108558
USP53	0.342287	0.210229	0.465609
SETD7	0.974106	0.00474017	0.0113938
ACTR3B	0.590635	0.107219	0.228681
ARHGAP24	0.863989	-0.19511	0.0634915
PELI2	0.656776	0.138352	0.182582
ZNF318	0.832747	0.0568136	0.0794867
ACTR5	0.520525	0.185742	0.283558
WFDC2	0.612534	-1.47309	0.212869
SHISAL2B	0.708552	-0.227935	0.149628
FAM83D	0.207025	0.24884	0.683976
PPP1R16B	0.775366	-0.221354	0.110493
TSPAN4	0.876748	0.0470386	0.057125
KNL1	0.843341	-0.0437882	0.0739969
ALG14	0.589147	0.100723	0.229776
HAUS2	0.799635	-0.0508029	0.0971081
RTF1	0.136438	-0.201055	0.865064
PARP6	0.474443	-0.187256	0.323816
POP7	0.929875	-0.0102435	0.0315755
BNC2	0.74274	-0.164123	0.129163
FAM222B	0.570712	0.121504	0.243583
HECTD4	0.937363	-0.0188941	0.028092
SLC12A9-AS1	0.234434	-1.38731	0.62998
ARHGAP4	0.830388	0.199987	0.0807188
NEDD8-MDP1	0.868046	-0.0393292	0.0614573
LRPPRC	0.16222	-0.128854	0.789897
MZF1-AS1	0.992201	-0.00766312	0.00340055
C19orf70	0.438441	0.0930883	0.358088
SH3RF3-AS1	0.304944	-2.42493	0.515781
ATRX	0.430901	-0.103913	0.365622
OGFR-AS1	0.807128	-1.32203	0.0930575
RALB	0.0524947	0.433483	1.27988
PDGFB	0.624678	1.92445	0.204344
TMEM218	0.752734	0.0642776	0.123359
ACR	0.74947	-1.32703	0.125246
CABP7	0.323803	-2.20363	0.489719
RPL3	8.11626e-08	-0.289674	7.09064
ZMAT5	0.652469	0.113238	0.18544
R3HCC1	0.264887	0.224085	0.576939
FANK1	0.0623265	3.46364	1.20533
SASS6	0.0595887	-0.341244	1.22484
CFAP65	0.550163	0.392302	0.259509
PRSS16	0.303959	-0.417653	0.517185
SRPRA	0.0672259	-0.249714	1.17246
DLX3	0.534915	-0.989997	0.271715
SPA17	0.200266	0.266505	0.698393
HUWE1	0.464732	-0.0825948	0.332797
FBXL19-AS1	0.125518	-1.38486	0.901294
HEXDC	0.851095	-0.0566836	0.0700222
TIAM1	0.428137	-0.179216	0.368418
SNHG15	0.150107	-0.200332	0.8236
DTYMK	0.0618151	0.175827	1.20891
ATG4B	0.279893	0.190594	0.553009
ING5	0.353042	0.179822	0.452174
TAP1	0.869391	0.0449958	0.0607849
OCLN	0.119635	0.465357	0.92214
CFAP299	0.685078	1.12039	0.16426
IFNA14	0.930858	-0.364941	0.0311165
C11orf71	0.977625	0.00944319	0.0098277
HARBI1	0.86756	-0.0851929	0.0617003
MPG	0.0325146	-0.31408	1.48792
C4orf33	0.547776	0.146346	0.261397
COL10A1	0.855237	0.990657	0.0679136
FRMD4A	0.771373	-0.112877	0.112735
HNRNPU	0.512644	0.0391541	0.290184
ANGEL1	0.323007	0.283531	0.490787
TUT1	0.98113	0.00591255	0.00827359
ACP4	0.855238	0.990652	0.0679132
IP6K2	0.920414	-0.0146191	0.0360168
MGAT5B	0.644138	-0.365507	0.191021
PRRT3	0.495729	0.284327	0.304756
TOP1MT	0.490065	-0.139247	0.309746
IL17RE	0.595172	0.844385	0.225357
CRELD1	0.000453733	-1.13508	3.3432
SRP68	0.339065	-0.102132	0.469717
MRPL43	0.228053	0.124716	0.641965
ST6GALNAC4	0.153338	-0.419832	0.814349
GDF2	0.855237	0.990657	0.0679136
KANTR	0.386064	-0.264434	0.413341
DNAJC27	0.602397	0.256669	0.220117
DAB2IP	0.339395	0.317279	0.469295
POMC	0.761121	0.453256	0.118546
RAD51	0.942251	-0.0733213	0.0258332
DDN-AS1	0.451164	0.901846	0.345666
EXOC3L4	0.855237	0.990657	0.0679136
GALNT8	0.209753	-1.92525	0.678292
CCNB2	0.750919	-0.0441601	0.124407
PLEKHF1	0.460154	-0.467339	0.337097
RNF111	0.797074	-0.0785086	0.0985015
MAP2K6	0.980924	0.00578588	0.00836474
CLMN	0.303908	-0.4115	0.517257
PLCH2	0.746625	-1.32732	0.126898
SGCE	0.577696	-0.155934	0.2383
RBM48	0.580648	0.168493	0.236087
CASD1	0.261553	-0.380736	0.582441
FLYWCH2	0.893713	-0.028086	0.048802
ZNF716	0.642142	1.86761	0.192369
SLFN5	0.944011	0.0420984	0.0250232
PAQR4	0.641489	0.100903	0.19281
AGAP1	0.567989	0.13768	0.24566
SKA3	0.36576	0.204809	0.436804
PRAP1	0.807128	-1.32203	0.0930574
MICU2	0.363888	0.144503	0.439032
SLITRK1	0.823964	-0.549184	0.0840916
GALNT11	0.656342	0.0694928	0.18287
TMEM151B	0.885685	-0.712443	0.0527207
ANGPT1	0.882936	-0.708395	0.0540709
TMED4	0.311351	-0.110964	0.506749
SETD4	0.997909	0.000758316	0.000909133
DNAJB11	3.16668e-14	-1.03694	13.4994
MASP2	0.90912	-0.373128	0.0413787
RORA-AS1	0.851775	0.387237	0.0696753
NEAT1	0.768361	-0.0502783	0.114435
PRPF6	0.149654	-0.228658	0.824911
CTSZ	0.148257	-0.975844	0.828985
ABCC11	0.728404	-0.766709	0.137627
TENT4B	0.6684	-0.0842039	0.174964
CTDSP2	0.592079	-0.102282	0.227621
CKAP5	0.556038	0.0665685	0.254895
HTR1D	0.996805	0.00578269	0.00138988
SLITRK4	0.553099	1.87013	0.257197
OR10A2	0.919326	0.294524	0.0365306
CHCHD7	0.479838	0.101352	0.318905
ZNF33B	0.156149	-0.297555	0.80646
FMC1	0.70645	-0.0333244	0.150918
IQSEC2	0.577292	-0.231463	0.238604
MFSD14B	0.781815	0.0377393	0.106896
ZNF682	0.816426	-0.565618	0.0880834
SRC	0.196515	-0.525381	0.706604
PGAP1	0.118133	-0.364705	0.92763
GRASP	0.679567	0.338492	0.167768
ZNF772	0.135588	0.93279	0.867779
NKX2-1-AS1	0.855237	0.990657	0.0679136
AP2B1	0.629027	0.074942	0.201331
LIAS	0.41928	0.248955	0.377496
TMEM156	0.754893	-1.68477	0.122115
TAC1	0.961944	-0.0732319	0.01685
PDS5A	0.776565	-0.0375203	0.109822
ZYG11A	0.266824	0.382505	0.573776
ARRDC1-AS1	0.472863	0.229641	0.325264
FAN1	0.595218	0.148808	0.225324
EIF1AY	0.807128	-1.32203	0.0930574
ZNF707	0.726568	0.248737	0.138724
CDK5R1	0.607175	-0.188992	0.216686
TNFRSF1B	0.637779	-1.34185	0.19533
ZNF135	0.855237	0.990657	0.0679136
PLPP1	0.94699	0.0193015	0.0236546
STX18-AS1	0.704098	0.328111	0.152367
PHGDH	0.58963	-0.0395321	0.22942
CSAG3	0.200797	-0.635527	0.697243
IREB2	0.0583726	-0.210366	1.23379
ZSWIM3	0.884026	0.0848735	0.0535348
ZNF750	0.397685	-2.18846	0.400461
RNF157	0.0573743	-0.428251	1.24128
ULK1	0.976763	-0.0080059	0.0102108
SECTM1	0.252374	-0.913169	0.597956
CBX8	0.158912	-0.335463	0.798844
BANP	0.963449	0.0112492	0.0161714
PPP1CA	0.840361	0.0190833	0.0755341
HCFC1	0.11684	0.169468	0.932409
TAS1R1	0.807129	-1.32203	0.0930573
UQCRH	0.807902	0.0124406	0.0926415
SLC39A4	0.267041	0.236403	0.573422
GPAM	0.271832	0.26396	0.565699
OBSCN-AS1	0.709186	0.364252	0.14924
MRPL55	0.149442	0.133532	0.825527
KIAA1191	0.655252	0.0463846	0.183592
CNOT6	0.802121	-0.0345682	0.0957599
PRKG1-AS1	0.628918	-1.47475	0.201406
TP63	0.75489	-1.68479	0.122116
SLC25A22	0.0502366	0.432077	1.29898
DDX24	0.83087	-0.0232961	0.0804667
C21orf91	0.269555	0.240963	0.569352
EPHA8	0.279826	-0.553324	0.553112
OSBPL3	0.1994	0.346383	0.700274
TEX15	0.487959	-0.434401	0.311617
HCN4	0.30353	-1.48745	0.517798
S100P	0.365545	-1.69784	0.437059
NTS	0.161056	-2.01573	0.793023
APOBEC3D	0.898729	-0.124626	0.0463713
FARS2	0.15614	-0.429999	0.806487
CD81	0.181309	0.111359	0.741581
ST6GAL2	0.753445	-1.17219	0.122948
DERA	0.235723	-0.227462	0.627598
KLHL12	0.249716	0.216952	0.602554
RGS4	0.188668	-1.84897	0.724301
CTBS	0.0958109	-0.483799	1.01859
SSX2IP	0.644794	0.0723336	0.190579
IGSF21	0.549525	-0.885686	0.260013
SHLD1	0.454947	-0.333457	0.342039
JMJD1C	0.594896	0.161576	0.225559
EEF2K	0.800324	-0.0645613	0.0967343
CRYM	0.76276	0.249927	0.117612
MTMR8	0.938509	0.0918038	0.0275616
ZNF416	0.207997	0.917835	0.681943
ASB9	0.855237	0.990657	0.0679136
MARCH3	0.614787	0.214371	0.211275
YPEL2	0.534129	-0.283201	0.272354
SYCP3	0.637182	0.782929	0.195737
NEDD1	0.634891	0.101126	0.197301
GAS2L3	0.704708	0.116878	0.151991
CHMP1A	0.264121	0.191848	0.578196
SUGP2	0.193654	0.188319	0.712974
CAMKMT	0.0759696	0.610537	1.11936
UGGT2	0.319316	-0.269295	0.495779
ZFP14	0.973769	-0.0171884	0.011544
COL25A1	0.224391	-0.451486	0.648995
SOCS6	0.712623	-0.122996	0.14714
LMNB2	0.080144	0.164474	1.09613
CPNE1	0.689152	-0.0566006	0.161685
MVK	0.216994	0.23732	0.663552
SEPSECS	0.222016	0.561654	0.653616
TTR	0.855237	0.990657	0.0679136
B4GALT6	0.727499	0.0682669	0.138168
GLB1L2	0.297173	-0.312475	0.526991
LRRC49	0.954322	0.0181287	0.0203052
PPP6R1	0.142144	-1.27687	0.847271
TUBGCP4	0.803089	-0.0460543	0.0952361
DGCR2	0.838051	0.0293384	0.0767296
CNTNAP4	0.754893	-1.68477	0.122115
FAM83F	0.902122	-0.376196	0.0447347
GGT2	0.855237	0.990657	0.0679136
ANKRD55	0.855237	0.990657	0.0679136
HINFP	0.400097	-0.208577	0.397834
BSG	0.5306	0.0509895	0.275233
PPL	0.385597	-1.47105	0.413866
EEF2KMT	0.786486	-0.0780295	0.104309
CYP4X1	0.706603	-0.621397	0.150825
ZNF75D	0.146329	0.533099	0.83467
ETFRF1	0.82037	0.0502297	0.0859901
UNC50	0.195045	-0.190643	0.709866
TIMMDC1	0.103796	0.187239	0.983818
CRYBA1	0.81292	0.990654	0.089952
NUFIP2	0.617673	0.060155	0.209241
KLHDC4	0.555457	-0.131021	0.25535
MCM4	0.789811	-0.0197743	0.102477
ARF3	0.573029	0.0609972	0.241823
PIK3R4	0.996529	0.000901739	0.00150984
ZNF775	0.802875	0.0846566	0.0953521
ZNF777	0.365823	-0.268145	0.436729
BLOC1S5-TXNDC5	0.00065171	-0.288861	3.18595
TRAPPC2	0.19735	0.243072	0.704764
ZNF605	0.0569761	-1.07594	1.24431
LRP10	0.648304	0.111473	0.188221
PEX11G	0.984	0.0128823	0.00700478
PIGT	0.44375	0.110275	0.352862
SVIL	0.560558	0.256892	0.251379
FSIP1	0.507158	1.02572	0.294857
MATN4	0.690213	-0.645285	0.161017
SLC17A7	0.971821	-0.0390291	0.0124137
PELI1	0.172204	-0.400867	0.763957
PCSK6-AS1	0.233359	-1.16562	0.631976
PHLDB1	0.634272	-0.162126	0.197724
ANKRD13A	0.426765	-0.168856	0.369811
EFCAB10	0.892152	0.0747566	0.0495612
C5orf47	0.855237	0.990657	0.0679136
APBA1	0.467492	-0.753689	0.330226
PAPOLB	0.985926	0.0165857	0.00615568
TCF7L1	0.559091	-0.263197	0.252518
TMEM245	0.808737	0.0364834	0.0921925
PRUNE2	0.0861908	-0.888938	1.06454
SMPD3	0.961288	-0.0683551	0.0171465
VTI1A	0.186224	0.332982	0.729964
COG4	0.885659	-0.0293566	0.0527333
PRAG1	0.750263	0.276207	0.124786
DNLZ	0.332491	0.261412	0.47822
GPATCH11	0.888439	-0.0303524	0.0513723
HSPB8	0.324732	-0.870466	0.488475
SFRP4	0.915368	-0.370564	0.0384041
NUP93	0.273328	0.14549	0.563315
CENPT	0.183439	0.337023	0.736509
TSNAXIP1	0.8299	0.259193	0.0809743
MEST	0.985201	0.0305437	0.00647528
CNTN1	0.603509	-0.158572	0.219316
MPI	0.264817	-0.135283	0.577054
CTTNBP2NL	0.528582	-0.16348	0.276888
SCARNA1	0.284719	1.80114	0.545584
ZNF550	0.0397161	-1.18031	1.40103
ZBED5-AS1	0.0328378	0.847455	1.48363
PPP2R3C	0.210225	0.220104	0.677315
NKAIN3	0.946961	-0.360241	0.023668
ZNF267	0.810138	-0.0690208	0.0914411
RNPC3	0.166962	-0.367101	0.777382
RACK1	0.00719452	-0.150017	2.143
DISP3	0.789295	-1.32341	0.102761
CDRT4	0.925393	-0.0330329	0.0336736
GNB4	0.506052	0.107587	0.295805
AWAT1	0.724778	1.90022	0.139795
SCN8A	0.556957	0.508729	0.254179
CCDC183-AS1	0.893426	0.338524	0.0489413
ADAMTS10	0.809968	-0.425525	0.0915324
ASB7	0.84565	-0.0557926	0.0728092
GTF2H2C	0.950146	-0.0135268	0.0222097
ANKZF1	0.453116	-0.234103	0.34379
HDAC11	0.535831	0.287161	0.270972
CWC22	0.529463	-0.144804	0.276165
AZI2	0.597147	0.0751692	0.223919
TGFBR2	0.142494	-0.539003	0.846204
SERF1B	0.672115	-0.0627356	0.172556
SMN2	0.844055	0.0275591	0.0736294
GRB10	0.151432	0.242786	0.819783
ADCY10	0.593073	-1.47092	0.226892
LAMB3	0.695866	-1.64962	0.157474
ABHD11	0.22924	0.400981	0.639709
ALG9-IT1	0.807129	-1.32203	0.0930573
ZNF436	0.443847	-0.320627	0.352767
HNRNPR	0.302257	0.0766684	0.519624
MAEA	0.844455	0.0271545	0.0734233
COBL	0.823444	-0.0773415	0.0843659
MGST1	0.213087	0.174567	0.671443
STK33	0.57084	0.22653	0.243485
PTGER3	0.376907	-2.14095	0.423766
FASTK	0.0111755	0.567329	1.95173
TMUB1	0.544885	-0.098815	0.263695
PHKA2	0.382015	0.272933	0.41792
XAGE2	0.855237	0.990657	0.0679136
C9orf85	0.49666	-0.159974	0.303941
TSKU	0.29786	-0.372314	0.525988
IGIP	0.930854	0.0390991	0.0311183
PIK3AP1	0.982753	0.0144841	0.00755551
KIF24	0.472939	-0.334824	0.325195
DPF1	0.621027	0.184085	0.20689
ARAP1	0.747893	-0.0815223	0.126161
FAT4	0.96534	-0.025431	0.0153196
S100A4	0.50027	-0.608133	0.300795
PLEKHG4	0.0957532	-0.473485	1.01885
ZNF250	0.917062	-0.0506744	0.0376011
WDSUB1	0.602412	-0.146861	0.220106
ZNF79	0.711645	-0.25014	0.147737
RAC2	0.64394	-0.717939	0.191154
LIF	0.663456	0.362184	0.178188
C22orf23	0.260132	-0.852847	0.584806
PLXDC2	0.140025	-0.591559	0.853796
URGCP-MRPS24	0.797799	-0.669801	0.0981063
PPP1R13L	0.218665	-0.730249	0.660221
ZNF25	0.818242	-0.138152	0.0871185
WWTR1-IT1	0.807129	-1.32203	0.0930573
EIF3F	0.0539768	-0.167898	1.26779
GTSE1-DT	0.279286	1.97996	0.55395
NUP62CL	0.86545	-0.0463085	0.0627582
SFI1	0.404124	0.266348	0.393485
PANX1	0.235207	0.561461	0.628549
UBAC2	0.622113	-0.077379	0.206131
CD2AP	0.93763	0.0136498	0.0279687
ZBTB14	0.652477	0.151112	0.185435
ARGLU1	0.903903	-0.0148129	0.0438782
SPRN	0.552555	-0.280544	0.257624
HYLS1	0.128979	-0.479635	0.889482
NBEAL2	0.839874	-0.0859479	0.0757859
CCDC12	0.0303032	0.361265	1.51851
HDHD2	0.992299	-0.00223609	0.00335757
CCDC57	0.873687	-0.0740112	0.058644
USP12-AS2	0.855237	0.990657	0.0679136
LGSN	0.854581	0.990652	0.0682469
TRIM21	0.830664	-0.124913	0.0805746
CSNK1G2	0.79461	0.0374243	0.0998462
REXO4	0.491815	-0.127893	0.308198
GTF3C5	0.367594	-0.136308	0.434632
HOOK2	0.87935	-0.0500747	0.0558381
STX6	0.665631	0.103347	0.176766
GLUL	0.944404	0.00538349	0.0248421
DHX9	0.554584	0.0456059	0.256033
RNASEL	0.744045	-0.145833	0.128401
PP7080	0.394067	-0.182382	0.404429
FLVCR1	0.744017	0.0530986	0.128417
PTPRG-AS1	0.663851	0.168454	0.177929
A1BG-AS1	0.36687	0.427491	0.435488
ZNF483	0.729717	0.577462	0.136845
CACYBP	0.011822	0.177468	1.92731
AQR	0.70592	0.0697818	0.151244
HOXA11-AS	0.660566	0.105971	0.180083
YWHAH	0.998945	-0.000121266	0.000458333
KCNN2	0.360088	1.26552	0.443592
AJM1	0.856387	-0.335645	0.0673297
SH3PXD2B	0.130511	0.470238	0.884353
SLC25A25-AS1	0.150224	0.699494	0.823261
C11orf94	0.807129	-1.32203	0.0930573
BNC2-AS1	0.730089	-0.568649	0.136624
NENF	0.689164	-0.0347838	0.161678
CHFR	0.286165	0.304119	0.543383
ST8SIA4	0.465754	0.545978	0.331844
NSL1	0.0588421	0.233453	1.23031
ITPKC	0.374498	0.423694	0.42655
RBMS2	0.236267	-0.377246	0.626597
ATP5MG	0.18713	0.0772418	0.727856
MCF2L-AS1	0.914873	0.0679411	0.0386392
FGF18	0.717275	0.563771	0.144314
RAB11B-AS1	0.873294	-0.0677913	0.0588397
DOLK	0.705677	-0.0862591	0.151394
ALOX5	0.162369	-2.45797	0.789496
SFXN2	0.748511	0.0663965	0.125802
TBC1D3F	0.471109	1.16012	0.326879
POU1F1	0.807128	-1.32203	0.0930575
VSIG10	0.813181	0.0810303	0.089813
GAN	0.0818693	0.362046	1.08688
UPK2	0.72873	-1.67034	0.137433
GNL2	0.969559	-0.00508603	0.0134259
MEI4	0.514127	-1.45948	0.28893
CDCA8	0.102169	0.240079	0.99068
NPNT	0.160947	-0.784267	0.793316
AGO4	0.532899	-0.207882	0.273355
DUSP3	0.705337	-0.0444159	0.151603
GALM	0.312985	0.20547	0.504477
VASH1	0.530777	0.163937	0.275088
ING3	0.278643	-0.193717	0.554953
MPP6	0.27756	-0.179742	0.556643
GSDME	0.414069	0.440572	0.382927
AHCY	0.0950752	-0.132597	1.02193
RIN2	0.82022	-0.151044	0.0860697
POLR3F	0.370177	0.22517	0.431591
YLPM1	0.66692	0.0675914	0.175926
PPP1R37	0.557242	-0.290891	0.253956
DCAF4	0.905556	-0.0355601	0.0430848
LPAR6	0.561478	2.45306	0.250668
ITPRIP	0.338337	0.435652	0.470651
PPRC1	0.796343	-0.0407335	0.0988997
PDCD11	0.687867	0.073157	0.162495
CNNM2	0.271691	0.358096	0.565925
ADAM12	0.248222	2.46935	0.605159
HNRNPA1L2	0.381263	0.137114	0.418775
LHX8	0.743981	0.212661	0.128438
SNX7	0.466698	0.132343	0.330965
LRRIQ3	0.979366	0.0102252	0.00905493
TYW3	0.0757924	0.271432	1.12037
ZDHHC9	0.425633	-0.137136	0.370964
ZBED6CL	0.557462	-0.192435	0.253785
SHC4	0.697161	0.990663	0.156667
TCEAL3	0.353395	-0.470148	0.45174
PRSS37	0.530365	-3.31858	0.275426
TMEM71	0.855237	0.990657	0.0679136
PBX1	0.91159	0.0170913	0.0402003
NDUFA4L2	0.869956	-0.19939	0.0605029
MAMDC2	0.878455	-0.388052	0.0562804
MROH8	0.149521	-1.71145	0.825297
TPST1	0.641415	0.161454	0.192861
TOR1AIP2	0.774558	0.0313402	0.110946
RCOR1	0.745137	-0.0739697	0.127764
PLD5	0.807533	0.272995	0.0928399
PRPH2	0.830695	-1.14582	0.0805583
TSNAX-DISC1	0.0867372	1.34284	1.06179
PTPRK	0.557668	-0.145275	0.253624
GSTCD	0.83951	-0.0410707	0.0759742
INTS12	0.623325	-0.101739	0.205286
ZC3H3	0.039497	0.678798	1.40344
STRN3	0.148345	0.21753	0.828726
ZNF239	0.298504	0.389346	0.52505
ATP6V1G2-DDX39B	0.0501123	0.16031	1.30006
CAGE1	0.807128	-1.32203	0.0930575
AQP12A	0.807129	-1.32203	0.0930573
PRIMPOL	0.0914846	0.529152	1.03865
ERAP1	0.0852859	-0.797154	1.06912
SERINC5	0.532349	0.239901	0.273804
ERAP2	0.260438	0.784546	0.584296
CMYA5	0.189863	1.78032	0.72156
RANGAP1	0.00551216	0.321762	2.25868
ZC3H7B	0.963506	0.00725977	0.0161458
GDAP1	0.158293	-0.397021	0.800539
RAB2A	0.332891	0.118195	0.477698
GATAD1	0.585318	-0.0938058	0.232608
MINDY4	0.586765	-0.407298	0.231536
HS3ST3B1	0.418047	0.171401	0.378775
SLC25A35	0.643753	0.23542	0.191281
SKA2	0.946976	-0.00653364	0.0236609
PLCB1	0.330957	0.259659	0.480229
NPIPA2	0.970014	0.0181683	0.0132221
CACNA2D2	0.794691	-0.132694	0.0998019
MPV17L2	0.238768	0.218134	0.622024
NOVA2	0.66721	0.57038	0.175738
AES	0.131366	-0.225559	0.881516
PTOV1	0.21519	0.129714	0.667178
KIF1B	0.407817	0.137423	0.389534
TXNDC5	0.807129	-1.32203	0.0930573
CLRN1-AS1	0.855237	0.990657	0.0679136
TXNDC12-AS1	0.704719	-1.65549	0.151984
ANKMY2	0.865464	-0.0491707	0.0627511
MED7	0.694624	0.0950664	0.15825
ACTR3C	0.323818	-1.02147	0.489699
RPS20	0.0560119	-0.104569	1.25172
CMTR2	0.598795	0.19305	0.222722
OXTR	0.937632	0.108064	0.0279678
TAOK1	0.555727	-0.0851075	0.255139
CCDC163	0.280035	-0.483185	0.552788
C4orf36	0.838087	0.404428	0.076711
IPO4	0.359428	0.113588	0.444388
MAP4K5	0.368737	0.179786	0.433283
CCDC74B	0.335497	0.362493	0.474311
PCSK9	0.855237	0.990657	0.0679136
LTC4S	0.858449	-0.362504	0.0662856
ATRIP	0.453737	0.20037	0.343195
PSMD5	0.381755	-1.25317	0.418215
L3MBTL1	0.512725	0.415352	0.290115
TMEM101	0.191629	-0.214115	0.71754
XK	0.289546	-0.493999	0.538282
CHAC1	0.00102167	-1.24007	2.99069
WWP1	0.830998	-0.0433377	0.0803999
SPARC	0.550935	-0.127225	0.2589
CLDN5	0.831229	0.990656	0.0802791
EIF3C	0.58312	-0.0476939	0.234242
ZCCHC4	0.649866	0.169322	0.187176
TGFA	0.95024	-0.0899484	0.0221665
CAMK2N1	0.379468	-0.22201	0.420824
TCP11L2	0.566894	-0.994995	0.246498
TMCO4	0.573413	0.312998	0.241532
SERINC2	0.0360118	0.720587	1.44356
SYNGAP1	0.639952	-0.145987	0.193852
HRH3	0.855238	0.990652	0.0679132
LYN	0.29383	-0.244193	0.531904
LMLN2	0.754893	-1.68477	0.122115
LRRC43	0.900796	-0.376801	0.0453736
SLTM	0.482291	-0.118749	0.316691
CTDSPL2	0.861107	-0.0345063	0.064943
TOMM40	0.0837016	0.188459	1.07727
NECTIN2	0.429572	-0.160364	0.366964
RNF216	0.823843	-0.0430628	0.0841554
SPPL3	0.79013	-0.0443437	0.102301
APOC1	3.88673e-05	-0.620393	4.41042
GAREM2	0.485774	-0.303408	0.313566
U2SURP	0.484749	-0.0624845	0.314483
TTC8	0.663617	-0.112378	0.178082
MFSD12	0.0899504	0.357833	1.046
DDX55	0.17441	-0.202673	0.758428
MED17	0.832815	-0.087449	0.0794516
PLEKHM3	0.66331	0.174325	0.178284
PRNP	0.618824	-0.0847458	0.208433
RNASEH1	0.441931	0.155046	0.354646
RPS7	0.0138162	-0.139852	1.85961
PSKH1	0.314477	-0.234231	0.502411
MRM3	0.312645	0.18462	0.504949
PARP3	0.957554	-0.0258312	0.0188368
FBXW8	0.861422	-0.0855224	0.0647843
RBM17	0.38179	0.0900254	0.418175
SCARNA14	0.524078	0.568049	0.280604
LRRC56	0.0937219	2.80555	1.02816
ZBTB11-AS1	0.693272	0.140615	0.159096
BSDC1	0.325269	-0.128744	0.487757
TMEM234	0.555583	0.180333	0.255251
STMP1	0.164057	0.136259	0.785006
CCDC28B	0.597326	-0.117235	0.223788
IQCC	0.893801	0.0424571	0.0487594
NEURL4	0.455187	1.39611	0.34181
AIFM2	0.675816	0.217688	0.170171
ST8SIA6-AS1	0.67895	-1.75578	0.168162
MRPL48	0.0988179	0.256033	1.00516
RAB6A	0.536239	-0.0997863	0.270642
CYP46A1	0.803788	0.990659	0.0948583
LCN15	0.407591	-1.02811	0.389776
PDE4A	0.803236	-0.119573	0.0951568
ASB8	0.483108	-0.118287	0.315956
TMSB15B-AS1	0.280439	-2.24554	0.552162
RPS6KB2	0.726727	-0.0605776	0.138629
MRAP2	0.265138	0.827022	0.576527
SF3B6	0.816343	-0.0167726	0.0881271
CETN2	0.783635	0.0333637	0.105886
NINJ1	0.294935	0.27234	0.530274
BARX1	0.59078	-0.239166	0.228574
CYP26B1	0.995193	0.00365613	0.00209269
OR2A1	0.754893	-1.68477	0.122115
INSL3	0.855237	0.990657	0.0679136
MRPL35	0.151587	0.203291	0.819337
CCNL2	0.51591	0.097117	0.287426
AMY1A	0.664527	-1.33758	0.177487
AGTRAP	0.746957	0.052125	0.126705
FAM200B	0.796878	0.0384172	0.0986082
SRRM3	0.348047	-0.732065	0.458362
THOP1	0.565353	-0.0639428	0.24768
ZNF554	0.250776	-0.579282	0.600714
RAB33B	0.535157	0.169499	0.271519
C15orf62	0.603883	-1.24386	0.219047
PNP	0.0325704	-0.266926	1.48718
NEDD4	0.848034	0.0726473	0.0715866
PDCD2	0.167993	0.124716	0.774709
WDR7	0.898369	0.0445095	0.0465452
DNAH7	0.494802	-1.20284	0.305569
SELENOI	0.828779	-0.0360199	0.0815612
FAM78B	0.693419	-0.616635	0.159004
RCBTB1	0.729089	0.0725306	0.137219
PHF11	0.92703	0.0550133	0.0329062
MED4	0.999867	-2.1437e-05	5.7685e-05
LRCH1	0.426978	-0.282592	0.369595
SUCLA2	0.114838	0.207662	0.939914
NBEA	0.479241	-0.25463	0.319446
FAHD2B	0.268238	0.313087	0.571479
TC2N	0.0848322	-0.500054	1.07144
DCX	0.927627	-0.366027	0.0326266
CD82	0.0276909	1.32855	1.55766
SERTAD4-AS1	0.749034	-0.150662	0.125499
PELI3	0.724549	-0.13564	0.139932
TATDN3	0.606151	0.101684	0.217419
HES7	0.471825	-1.05369	0.326219
MAN2A1	0.337481	0.227343	0.471751
ANKRD10	0.461239	0.148688	0.336074
DUX4L9	0.855237	0.990657	0.0679136
SREBF1	0.841445	0.0508536	0.0749742
TRPC5	0.855237	0.990657	0.0679136
MTRNR2L12	0.0689781	-0.400596	1.16129
KIF11	0.00992965	0.290028	2.00307
SAV1	0.835699	0.0325443	0.0779503
AMN1	0.031089	0.820499	1.50739
BICD1	0.962455	-0.0196879	0.0166197
IGF1R	0.114604	0.30595	0.940799
TMEM43	0.6544	0.0784076	0.184157
MTSS1	0.145994	0.928742	0.835666
KIAA0232	0.707875	0.101262	0.150043
OSR1	0.568794	-1.07794	0.245045
MAMLD1	0.802571	0.179425	0.0955165
ST6GALNAC5	0.858148	-0.235448	0.0664379
ZNF346	0.504159	-0.161169	0.297432
UNC5A	0.383242	-1.197	0.416527
ARL13B	0.491194	-0.177975	0.308747
TIGD7	0.146679	1.27378	0.833633
PDPK1	0.72032	0.0717413	0.142474
TM7SF3	0.907926	0.0186861	0.0419498
CRADD	0.138015	0.474847	0.860072
DEF8	0.127644	0.183834	0.893998
MDK	0.000646524	-0.338588	3.18942
AMBRA1	0.941965	-0.0186477	0.0259654
ST8SIA1	0.376391	2.44995	0.424361
CLEC4A	0.611393	1.89345	0.213679
CMAS	0.466498	0.0848924	0.33115
HCFC2	0.846069	0.067112	0.072594
PRKAB1	0.957851	-0.0127422	0.0187021
XYLT1	0.0371687	-2.00433	1.42982
PSMD6-AS2	0.798309	-0.574824	0.0978291
HS3ST6	0.920208	-0.368693	0.0361139
RERE	0.973258	-0.00726259	0.0117718
LHPP	0.20629	-0.353698	0.685522
TAX1BP1	0.424402	-0.0842904	0.372222
ADAMTSL3	0.873088	-0.391043	0.0589418
DPYSL2	0.526274	0.134964	0.278788
STEAP1B	0.205171	-0.961186	0.687884
MPRIP-AS1	0.560192	0.680613	0.251663
ITGA1	0.722561	0.176834	0.141125
FOXO1	0.750043	-0.0806824	0.124914
RAB6C-AS1	0.891531	-0.141721	0.0498634
FBXL5	0.918906	-0.0214365	0.0367288
ARHGEF17	0.658881	0.468693	0.181193
KRTAP19-1	0.731339	0.210893	0.135881
GUCD1	0.205848	0.187781	0.686453
VSNL1	0.429511	1.87855	0.367025
KATNBL1	0.884645	-0.0325843	0.0532308
EMC7	0.334668	-0.117511	0.475386
SMG9	0.980337	-0.0059427	0.00862444
UBE2D2	0.923859	-0.00947095	0.0343942
SLC30A9	0.78702	-0.0320655	0.104014
DIAPH1	0.0298781	0.398207	1.52465
IER5	0.0515619	-0.283625	1.28767
COPS2	0.224155	-0.153881	0.649452
GABRB3	0.456108	-0.20418	0.340932
ANKHD1	0.0167988	0.810394	1.77472
OLAH	0.836495	-0.602348	0.0775368
RPP38	0.679461	0.0805185	0.167836
NMT2	0.0779261	-0.348115	1.10832
ANKRD20A1	0.495211	-1.45592	0.30521
TMEM45A	0.630209	-0.128743	0.200515
ZNF678	0.262385	-0.226857	0.581062
RYK	0.494153	-0.128343	0.306139
TOPBP1	0.169522	0.204998	0.770773
SNRK	0.51963	-0.195433	0.284306
LDOC1	0.413762	0.13457	0.383249
EXT1	0.598175	-0.110538	0.223172
MAPK12	0.957079	-0.0114551	0.0190524
SHMT2	0.158177	-0.135283	0.800858
RNFT2	0.609984	0.138101	0.214682
QRFPR	0.530749	0.514308	0.275111
POFUT2	0.711751	-0.0900588	0.147672
FAM157C	0.251096	2.86744	0.60016
PDZD7	0.511814	-0.453682	0.290888
MAPT	0.466642	0.202309	0.331016
YAF2	0.212396	-0.28137	0.672854
SLAIN1	0.605475	0.0726039	0.217904
ISPD	0.946229	0.0428053	0.0240039
DIAPH3	0.222872	-0.214585	0.651944
NPIPA7	0.87719	0.0734424	0.0569064
MSL3	0.580062	-0.13079	0.236526
CLNS1A	0.22295	-0.103806	0.651792
TRIB3	5.19115e-06	-1.07412	5.28474
PTPA	0.636917	-0.0799368	0.195917
TRAPPC8	0.178544	0.213812	0.748256
CMC1	0.87723	0.0201701	0.0568865
CCDC43	0.21946	0.153391	0.658645
AKAP9	0.854308	-0.0358972	0.0683857
GPM6A	0.449746	-0.237324	0.347033
HECA	0.98472	0.00422951	0.00668706
FAM237B	0.358504	-2.431	0.445506
IFRD1	0.13729	-0.202006	0.862362
CBX6	0.102579	0.175892	0.988943
TRMT44	0.869118	0.0618125	0.0609211
ISL2	0.908089	0.0273444	0.0418717
PKD2L1	0.807129	-1.32203	0.0930573
MOCS2	0.176904	0.186178	0.752262
ITGA2	0.420963	-0.361906	0.375756
AKR1C4	0.754893	-1.68477	0.122115
SLC45A2	0.855237	0.990657	0.0679136
COPS8	0.0230538	0.244871	1.63726
BARD1	0.718753	0.0697793	0.14342
FSTL5	0.493973	2.45028	0.306297
DHRS7	0.469502	-0.100119	0.328362
PPM1A	0.982499	0.00414436	0.00766774
MSX2	0.078848	0.402503	1.10321
SAP30BP	0.963495	0.00773859	0.0161505
VPS11	0.618606	0.123945	0.208586
WDR92	0.335393	0.258192	0.474447
ZNF487	0.21351	-0.755078	0.670582
DDR1	0.00308068	-1.23211	2.51135
FLJ45513	0.99607	0.0101047	0.00171034
RPP25	0.793825	-0.0458446	0.100275
GRINA	0.754209	0.0374712	0.122508
ARIH2	0.432272	-0.0926714	0.364243
PLPPR3	0.673724	0.588277	0.171518
WRNIP1	0.435592	0.110904	0.36092
MRS2	0.305703	-0.152271	0.5147
DNAJC19	0.776019	0.0373243	0.110128
PARP2	0.357187	0.157803	0.447105
GSTP1	0.332856	0.0594003	0.477743
SMIM11A	0.512907	0.125001	0.289962
FDX2	0.522433	-0.124707	0.28197
EXOC3L1	0.935669	-0.169029	0.028878
RNA5S14	0.91015	0.250341	0.0408868
POU2F2	0.29044	-1.18977	0.536943
CLHC1	0.717053	0.217754	0.144449
NEUROD1	0.30113	1.80725	0.521246
DLG5	0.792853	-0.0487364	0.100808
DUSP19	0.249632	0.428836	0.602701
FRZB	0.70123	-1.65323	0.154139
NCK1	0.464087	-0.148053	0.3334
TMED6	0.829236	0.419997	0.0813218
FMOD	0.807129	-1.32203	0.0930573
ZBED9	0.768974	0.127853	0.114088
TRMT1L	0.321666	0.184231	0.492595
IFI6	0.506133	-0.139056	0.295735
AHDC1	0.0580437	-0.794891	1.23625
CASC19	0.824745	-0.553175	0.0836804
LPP	0.975253	-0.00712028	0.0108826
PCOLCE	0.599485	0.234445	0.222221
DAXX	0.869871	-0.0249866	0.0605452
RIMBP3C	0.127923	2.47313	0.89305
STK17B	0.610624	-0.122063	0.214226
CDC123	0.1266	0.137993	0.897565
PHC3	0.00105719	0.977493	2.97585
AUTS2	0.580927	0.068111	0.235878
PIAS1	0.484969	0.114422	0.314286
RALBP1	0.668494	0.0787761	0.174902
MIS18A	0.777517	0.0286982	0.10929
PYCR3	0.455708	-0.193006	0.341314
TSTA3	0.237692	-0.27446	0.623986
NUDT10	0.868331	0.0444734	0.0613147
ZNF300	0.316398	0.484156	0.499766
TNIP1	0.645962	-0.0972129	0.189793
G3BP1	0.0364015	0.187047	1.43888
SUMF2	0.43993	-0.0966085	0.356616
ZNF628	0.414599	-0.376063	0.382371
MMP2	0.155077	-0.856096	0.809452
EEF1D	0.171848	-0.100048	0.764856
STRADB	0.503409	0.127714	0.298079
PDZK1	0.212676	-2.5957	0.672282
YTHDC1	0.902768	0.018102	0.0444236
A4GALT	0.518511	-0.579174	0.285242
ATF4	0.0762139	-0.10561	1.11797
SLCO3A1	0.0796902	3.21683	1.0986
LANCL2	0.982643	-0.0050377	0.00760408
DDC	0.600783	1.06945	0.221282
FIGNL1	0.502399	0.124422	0.298952
SEC61G	0.00292916	-0.199563	2.53326
PACERR	0.922358	-0.367897	0.0351004
CBFA2T2	0.43078	0.244276	0.365744
NUCKS1	0.873115	-0.00910451	0.0589283
ABHD1	0.302585	-0.779378	0.519153
MEIS1	0.919024	0.0281916	0.0366733
MAP2K4	0.346487	0.166808	0.460312
EIF3H	0.00581678	-0.191435	2.23532
UTP23	0.683028	0.0813965	0.165561
SLC38A3	0.151809	-1.01248	0.818703
OLMALINC	0.473658	0.169409	0.324535
MSANTD4	0.154618	-0.33171	0.81074
TNPO2	0.787532	0.0431408	0.103732
ZNF721	0.64418	0.0966384	0.190993
CCNI	0.182033	-0.142058	0.73985
TOMM7	0.411476	-0.0461134	0.385655
EFR3A	0.707487	-0.0879578	0.150281
HHLA1	0.855237	0.990657	0.0679136
ENOPH1	0.655624	-0.0600489	0.183345
LIN52	0.325965	-0.206747	0.486829
E2F5	0.290201	0.18053	0.537301
ABCB8	0.215543	0.255617	0.666467
C2orf42	0.0696269	0.777525	1.15722
TRAK2	0.772325	-0.086592	0.1122
MAPK4	0.826489	-0.217642	0.0827627
GCC2-AS1	0.808337	0.990656	0.0924078
ATF5	0.22829	0.44279	0.641513
PRRX2-AS1	0.855237	0.990657	0.0679136
MRPL57	0.719125	0.0370464	0.143196
EIF4B	0.0055203	-0.224636	2.25804
BMP5	0.837098	0.990655	0.0772235
NRXN3	0.307579	0.281093	0.512043
PPP1CB	0.475229	0.0659777	0.323097
ADAT3	0.646384	-2.44689	0.189509
ABCD1	0.948897	-0.0446197	0.0227811
SLC25A38	0.732031	0.0706326	0.13547
ESS2	0.677835	-0.0794239	0.168876
CSRNP1	0.981218	-0.0121696	0.00823435
CRYBB3	0.765015	0.990657	0.11633
GRID2	0.0747874	-3.16998	1.12617
TRIM59	0.694055	0.0740588	0.158606
IQCH-AS1	0.0503386	1.58301	1.2981
CRLS1	0.869083	0.0210843	0.060939
ZNF394	0.964021	-0.0155334	0.0159134
UBAP2L	0.110393	0.159041	0.95706
PARD6A	0.141003	-1.02754	0.850772
ZNF821	0.414705	-0.368622	0.38226
STRAP	0.00739367	0.198062	2.13114
SLCO1C1	0.711052	1.10554	0.148099
AEBP2	0.361217	0.158716	0.442231
DDX19A	0.584984	0.0796386	0.232856
SLC9A6	0.546805	-0.152796	0.262168
PRDX1	8.44822e-06	0.28408	5.07323
DDX58	0.570963	-0.486419	0.243392
DDX19B	0.218061	0.273497	0.661423
CMTM7	0.510241	0.131661	0.292225
FBXL2	0.0557449	-0.649897	1.25379
EEF1AKMT3	0.0470989	-0.873321	1.32699
NAT2	0.85524	0.990639	0.0679122
TTC34	0.471581	-1.07286	0.326443
SYTL4	0.911173	-0.0507611	0.0403992
ATAD3C	0.587213	0.786492	0.231204
CTSK	0.679681	-0.444032	0.167695
MCL1	0.689733	-0.0416106	0.161319
ADAMTSL4	0.573176	-1.46847	0.241712
EHD2	0.850754	-0.155331	0.0701962
RNGTT	0.730292	0.0804537	0.136504
HOTAIR	0.198151	-0.496056	0.703004
ROCR	0.860183	-0.667325	0.0654094
C2-AS1	0.807129	-1.32203	0.0930573
ATG101	0.51192	-0.185298	0.290798
CLIC4	0.742194	-0.0388581	0.129483
CCPG1	0.0544329	-0.496372	1.26414
SLC16A4	0.541218	-0.475335	0.266628
CRYM-AS1	0.535338	-0.938187	0.271372
SLC9A3R2	0.914423	-0.0221881	0.0388531
LDLRAD4	0.838781	0.13894	0.0763516
KCTD19	0.598096	0.459897	0.223229
ZNF573	0.919416	-0.0392461	0.0364879
CLDN4	0.78133	-0.511122	0.107166
UGT3A2	0.681892	0.251447	0.166284
FAM84B	0.0312494	-0.323833	1.50516
HOXC-AS1	0.233012	-0.618594	0.632623
PHF3	0.449046	-0.14513	0.347709
CEP70	0.777175	0.0719097	0.109481
ICA1L	0.710515	-0.138202	0.148426
PPM1L	0.795654	0.0829489	0.0992759
NCAPH2	0.287633	-0.18694	0.541162
TOMM34	0.346702	0.138441	0.460044
BMP3	0.452126	1.51188	0.344741
PRDM8	0.761234	-0.242287	0.118482
GRIK4	0.583736	0.786332	0.233783
MITF	0.147152	-0.46751	0.832234
ENTPD5	0.943875	0.0203395	0.0250853
CCK	0.855237	0.990657	0.0679136
PLCD1	0.437841	-0.899764	0.358684
AASS	0.661873	0.223065	0.179226
APOBEC3C	0.00503885	-0.453131	2.29767
LYPLA2	0.104061	0.33492	0.982711
REV3L-IT1	0.359565	2.48677	0.444222
ELOA	0.127877	0.24172	0.893208
HIST2H2BE	0.181148	-0.615231	0.741968
ZBTB40	0.90613	0.0327919	0.0428093
AMER1	0.891374	0.0519074	0.04994
ORC5	0.749318	0.0632112	0.125334
DNAAF5	0.0976701	0.235507	1.01024
SLC25A45	0.816012	0.156022	0.0883035
RPL29	0.0918557	-0.116708	1.03689
HSPA8	0.545282	0.0798912	0.263379
CENPJ	0.936266	-0.0219524	0.0286009
PARD3-AS1	0.811925	0.514784	0.0904843
PPP1R9A	0.304751	0.705007	0.516054
COG6	0.246733	-0.243196	0.607773
PLEKHB2	0.640548	0.0651906	0.193448
BIRC6	0.230839	-0.205161	0.636691
NOL10	0.865908	-0.0272646	0.0625282
TSR2	0.0484378	0.328276	1.31482
PRDM13	0.0323118	-0.894004	1.49064
CTBP1	0.811548	-0.0236135	0.0906858
FBXL4	0.366405	-0.219735	0.436039
CCNC	0.94642	0.00777783	0.0239162
TPTEP2-CSNK1E	0.401841	-0.108282	0.395945
FBP1	0.677611	0.951565	0.16902
MORF4L1	0.147225	0.101042	0.832019
TNIK	0.815072	-0.0530488	0.0888041
ZMYND8	0.130244	-0.320719	0.885242
FAM114A2	0.527998	0.138357	0.277368
FAM167A	0.763236	-0.335311	0.117341
SGK2	0.943554	-0.361138	0.0252334
PCMT1	0.578249	-0.0475551	0.237885
DAB1	0.928086	0.11496	0.0324118
CCDC170	0.965016	0.0424369	0.0154657
GRAMD2A	0.754893	-1.68477	0.122115
PRDM7	0.855237	0.990657	0.0679136
RHOT1	0.58261	0.108469	0.234622
ZNF74	0.383244	0.177922	0.416525
PPIL6	0.307669	-0.831114	0.511916
CHRD	0.99372	-0.00869942	0.00273594
THPO	0.141938	3.2127	0.847902
P3H2	0.54356	0.751834	0.264752
PURPL	0.372317	-0.47009	0.429087
PPP1R14D	0.482845	1.89171	0.316192
LSM14A	0.466104	0.081256	0.331517
CPLANE1	0.290063	-0.397474	0.537508
FAR1	0.896511	-0.0172036	0.0474446
HMBS	0.205829	0.189414	0.686494
CACNA1C-AS2	0.855237	0.990657	0.0679136
KMT5A	0.38192	0.139074	0.418028
OTUD6B-AS1	0.767454	0.0587354	0.114948
DLX6	0.142395	0.590445	0.846504
PCDHGA6	0.626879	0.985632	0.202817
SLC43A3	0.729667	1.86586	0.136875
NOL8	0.696198	0.0667741	0.157267
IRAK4	0.858169	-0.0599157	0.066427
CCDC151	0.743181	0.324824	0.128906
KCNG3	0.164055	-0.829928	0.785011
TIMM10	0.9734	0.00387106	0.0117085
CHPF	0.022997	-0.503775	1.63833
ACSL3	0.645054	0.0500234	0.190404
BAG6	0.306591	0.101821	0.51344
MRPS23	0.153263	0.162065	0.814562
LUC7L	0.792353	-0.0426714	0.101081
PRRC2A	0.869868	0.0269202	0.0605467
HSD11B1L	0.764254	-0.120935	0.116762
TERT	0.659839	0.411673	0.180562
CHML	0.183551	0.228943	0.736244
AMBN	0.890693	-0.124584	0.0502721
RPL39L	0.0999939	-0.255886	1.00003
IKZF5	0.120519	-0.269413	0.918944
SYNPO2	0.643767	0.972997	0.191271
RNF223	0.807129	-1.32203	0.0930573
XIAP-AS1	0.798762	-1.32266	0.0975824
ASXL3	0.945311	0.0338553	0.0244253
SLC25A52	0.443367	1.40425	0.353236
ACTL6A	0.950865	0.0101604	0.0218813
SYNGAP1-AS1	0.162947	2.87389	0.787953
AFG3L2	0.493614	-0.109794	0.306613
PPIE	0.42662	0.135058	0.369959
SMAP2	0.61755	0.103329	0.209328
SS18	0.146979	-0.195174	0.832744
WHRN	0.379642	0.434659	0.420625
ZNF529-AS1	0.848867	-0.211386	0.0711606
ZNF219	0.738168	-0.136171	0.131845
CASP7	0.851411	0.0367992	0.0698606
PPP1R36	0.755191	0.99066	0.121943
ARHGEF40	0.976407	-0.0130722	0.0103689
NSMF	0.144304	0.339332	0.840721
CEBPD	0.302628	-0.491604	0.519091
KDM4B	0.917314	0.0249259	0.0374819
TICAM1	0.651315	-0.33824	0.186209
CCDC32	0.957631	0.0165712	0.0188019
ATP2B1	0.719985	0.0521834	0.142677
UHRF1	0.64901	-0.0556611	0.187749
ORAI1	0.507339	-0.201048	0.294702
HOOK3	0.578238	-0.0869957	0.237893
HRG	0.855237	0.990657	0.0679136
TMPRSS4	0.855237	0.990657	0.0679136
DHRS11	0.817744	0.063228	0.0873829
LHX1	0.744053	0.189286	0.128396
DGLUCY	0.958317	0.0221769	0.0184906
RPH3A	0.754893	-1.68477	0.122115
ARHGAP11A	0.0209124	0.414323	1.6796
CHAMP1	0.977571	-0.0051641	0.00985185
INPP5F	0.873942	-0.0501504	0.0585172
GRM3	0.768342	0.453625	0.114446
CHPF2	0.126226	-0.325493	0.898851
CD247	0.725606	1.89439	0.139299
APPL1	0.694568	0.0574161	0.158285
MUM1L1	0.62291	0.385403	0.205574
BACE1-AS	0.319966	-0.396735	0.494896
PRR29	0.807129	-1.32203	0.0930573
C4B	0.950399	0.221311	0.022094
RBPMS-AS1	0.910897	-0.372381	0.0405307
HOXD8	0.674988	0.146705	0.170704
SLC6A14	0.855237	0.990657	0.0679136
CREG2	0.875914	0.511362	0.0575388
SYF2	0.148963	-0.213631	0.826923
RSRP1	0.832854	-0.0415532	0.0794313
OSBP	0.911347	-0.0184276	0.0403164
UBB	0.450849	0.0390214	0.345969
CDK1	0.506867	0.0586884	0.295106
STX8	0.831294	0.0479383	0.0802452
DTX4	0.807128	-1.32203	0.0930574
ATG2A	0.463446	-0.249328	0.334001
EHD1	0.78937	0.0570678	0.102719
ZNF488	0.351944	0.535145	0.453527
OGDHL	0.907574	-0.0386068	0.042118
CCNT1	0.839263	-0.0346255	0.076102
PUS7L	0.18214	0.272657	0.739595
ATG3	0.501792	0.0811383	0.299476
LBR	0.598913	-0.046357	0.222636
RABL3	0.557525	-0.135352	0.253736
ADPRH	0.775615	-0.552328	0.110354
EPHX1	0.811341	0.049918	0.0907966
SLC39A5	0.855237	0.990657	0.0679136
ZNF638	0.434021	0.1404	0.362489
TARBP2	0.0100632	0.489295	1.99727
WNT8B	0.754893	-1.68477	0.122115
FAM186B	0.755735	-0.827405	0.121631
RDH5	0.300861	-2.42439	0.521635
PGM1	0.783968	-0.0318036	0.105702
HUNK	0.513973	0.249498	0.28906
AGAP2	0.377694	-0.760302	0.42286
GABRA4	0.715933	-1.66264	0.145128
MTF1	0.225612	0.355708	0.646638
ZNF548	0.035032	1.37316	1.45553
PPIAL4A	0.287802	-2.93065	0.540906
APOA1	0.88133	0.117089	0.0548616
GCH1	0.426297	0.199587	0.370288
UTRN	0.288809	-0.265821	0.539389
ARAF	0.512236	-0.123668	0.29053
PTPRJ	0.315343	-0.415971	0.501217
C11orf49	0.833069	-0.0477243	0.0793188
LARP1B	0.00382303	-0.579852	2.41759
KLK8	0.341103	-1.14332	0.467114
ITGB3BP	0.991757	-0.00111311	0.00359491
KPNA4	0.409184	0.119128	0.388082
ASIC2	0.807128	-1.32203	0.0930575
MCM3AP-AS1	0.537711	-0.381487	0.269451
PALM2-AKAP2	0.557187	0.155143	0.253999
ZNF407	0.335164	-0.487578	0.474743
ZNF142	0.934879	0.0278506	0.0292447
RSPH9	0.626333	-1.34383	0.203195
TTC36	0.694966	-1.33331	0.158037
PPARD	0.76948	0.0912859	0.113803
MTRF1L	0.081496	0.401212	1.08886
COPS9	0.486343	0.0533342	0.313057
MIA2	0.427632	-0.213784	0.36893
RAPGEFL1	0.815783	0.188506	0.0884252
PDK3	0.520851	0.206373	0.283287
DLG3-AS1	0.773542	0.990657	0.111516
C2orf16	0.891917	-0.131595	0.0496758
NR2F1	0.43239	0.100356	0.364125
TCEANC2	0.963042	0.00825669	0.0163547
CHRAC1	0.841386	0.0305735	0.0750047
ZNF221	0.729561	0.580184	0.136938
TMEM59	0.656715	-0.0508409	0.182623
TMBIM6	0.102743	-0.0929847	0.988248
NF1	0.300488	-0.179623	0.522173
ALKAL1	0.116486	-0.334665	0.933727
TBX3	0.285874	0.204927	0.543825
VKORC1L1	0.998282	-0.000299834	0.000746633
ANXA6	0.0839722	-0.259864	1.07586
GMFB	0.656447	0.0645345	0.182801
ZNF441	0.293676	-1.14479	0.532132
NATD1	0.829182	-0.0737869	0.0813499
TMEM87A	0.535708	0.137279	0.271072
DYNC1I2	0.610092	0.0753179	0.214605
NIPSNAP3B	0.593143	-0.958599	0.226841
SYCE1L	0.202334	-0.661092	0.693932
ABCA1	0.0747259	-1.79918	1.12653
HIST2H2AA3	0.097253	-0.475095	1.0121
HIST2H3C	0.161091	-0.988087	0.792928
HIST2H2BF	0.28789	-1.54537	0.540773
MRPL14	0.27303	0.110236	0.56379
GPR137C	0.423044	0.346133	0.373615
HBEGF	0.322642	-0.600708	0.491279
LYSMD2	0.543158	-0.29936	0.265074
FGF7	0.67703	-0.857607	0.169392
SLC27A2	0.147483	-0.538659	0.831258
FBXW11	0.535805	-0.08818	0.270993
SPAG5	0.116022	0.259187	0.935458
SPINK8	0.807128	-1.32203	0.0930575
MAP3K20-AS1	0.895815	-0.379136	0.0477816
HAUS7	0.221664	0.315326	0.654304
ARHGAP19	0.230215	0.230446	0.637866
LCAT	0.598041	0.457808	0.223269
IL1R1	0.696549	0.483834	0.157049
COL21A1	0.458124	1.87752	0.339017
EIF2D	0.972909	0.0046847	0.0119277
KLHL31	0.243604	2.19343	0.613315
NLN	0.378296	0.156384	0.422169
CENPK	0.449666	-0.125157	0.34711
POLH-AS1	0.539988	-0.628571	0.267616
ATP2C1	0.547038	0.098434	0.261982
DUS1L	0.372041	0.0916698	0.42941
CNBP	0.46889	0.0682915	0.328929
ZNF829	0.203415	0.695452	0.691617
ACTRT2	0.855237	0.990657	0.0679136
FASN	0.606566	0.047837	0.217122
GPR173	0.893425	-0.722985	0.0489419
HES1	0.672962	0.0503286	0.172009
GAS6	0.885913	0.0595404	0.052609
CCDC82	0.202051	-0.307898	0.694539
DDX53	0.754893	-1.68477	0.122115
FAM110C	0.365489	-2.62086	0.437125
SRRM2	0.333718	-0.0831152	0.47662
ABCA3	0.414105	-0.208182	0.382889
EIF4E3	0.716658	-0.0793278	0.144688
KCTD5	0.130976	0.252334	0.882808
CLSPN	0.667462	0.168015	0.175574
TEKT2	0.459924	-0.889313	0.337314
BBS10	0.898134	0.0290244	0.0466589
FIZ1	0.738744	0.154418	0.131506
CNOT4	0.955742	-0.0116929	0.0196593
FAHD2A	0.960036	-0.0118685	0.0177124
KCNIP3	0.721013	-0.277864	0.142057
NKX2-2	0.797043	0.167964	0.0985185
RBCK1	0.494627	-0.132853	0.305722
TMX4	0.186768	-0.214667	0.728697
SARNP	0.683711	0.159718	0.165127
HSP90B1	4.55537e-62	-1.13941	61.3415
CFAP52	0.84926	0.502766	0.0709593
FAM96B	0.219785	0.118557	0.658002
RRAD	0.769065	0.990661	0.114037
MAPK9	0.806689	0.0332034	0.0932937
GK-IT1	0.855237	0.990657	0.0679136
COG7	0.827591	0.0539072	0.082184
CDK11A	0.842358	0.990659	0.0745034
CDC27	0.172615	0.165362	0.762922
FAM126B	0.772223	-0.0677512	0.112257
GJD2	0.875263	0.355219	0.0578614
RNF150	0.465374	-0.21626	0.332198
HCG25	0.528167	-0.975223	0.277228
HIVEP1	0.695883	0.154624	0.157464
USP49	0.992329	0.00372111	0.00334447
CCDC169	0.848688	0.990653	0.0712521
TOP1	0.598842	0.0545428	0.222688
TMEM11	0.872924	-0.0257593	0.0590237
KRT17	0.118917	-1.97912	0.924756
MAP3K3	0.274926	0.237161	0.560785
BHLHB9	0.510678	-0.186156	0.291853
TAF12	0.189363	0.210876	0.722704
MGAT4B	0.152449	0.224966	0.816874
ENOX1	0.298052	-0.365705	0.525708
MRNIP	0.0510444	0.482233	1.29205
RPL8	0.103923	-0.0862917	0.98329
SNX32	0.527446	2.44969	0.277822
JMJD7-PLA2G4B	0.807021	0.111894	0.0931149
DOK4	0.905958	-0.0629574	0.0428921
GABARAPL2	0.653401	-0.0388181	0.18482
ATF7IP	0.531419	0.166213	0.274563
PLEKHG5	0.304717	-0.757341	0.516104
NPIPB5	0.654355	0.124455	0.184187
IQGAP3	0.933563	0.0236773	0.0298565
NPAS2	0.527805	0.295208	0.277526
KIRREL1	0.362652	-0.303535	0.44051
TMEM116	0.735497	0.112857	0.133419
UCKL1	0.593367	-0.113771	0.226676
DDX27	0.879259	0.0234533	0.0558833
RNF114	0.220364	0.165791	0.656858
PMEPA1	0.189572	-0.484102	0.722225
STX16	0.742485	-0.0458191	0.129312
GGN	0.545923	1.49411	0.262868
TRAF5	0.155604	-0.447633	0.807978
FUCA1	0.943797	-0.0131429	0.0251213
GEMIN5	0.499899	-0.118893	0.301118
LEMD2	0.306402	0.222404	0.513708
MRPL22	0.293078	0.124735	0.533017
SOS1-IT1	0.823303	-0.196573	0.0844401
ZBED1	0.135334	0.395001	0.868593
LRP4-AS1	0.531412	-0.533485	0.274569
MVD	0.486637	0.181496	0.312795
TMEM189	0.149458	-0.231032	0.82548
ARAP2	0.386322	0.520702	0.41305
FAM13B	0.165109	-0.340469	0.782228
ZNF280B	0.31371	0.273714	0.503471
ANKRD18B	0.652731	-0.137041	0.185266
ASCC1	0.875913	-0.0315527	0.0575389
PDS5B	0.238068	0.245448	0.6233
ZNF92	0.959817	-0.0101213	0.0178116
EID1	0.254474	0.104594	0.594356
FAM13A-AS1	0.716204	0.376062	0.144963
KANSL1L	0.758367	-0.1561	0.120121
PLPP3	0.837403	0.0608299	0.0770654
TBC1D8B	0.953434	0.0279457	0.0207094
VPS4A	0.335453	0.127398	0.474368
WDR44	0.0587934	0.412997	1.23067
FXYD6	0.562272	-0.154848	0.250054
MAGEA2	0.384023	0.309049	0.415643
BRIP1	0.0539579	0.427188	1.26794
RHOXF2	0.735333	-1.67417	0.133516
RIF1	0.778053	0.0437101	0.108991
ATP8A2	0.35427	1.26346	0.450666
MIS18BP1	0.482001	0.163897	0.316952
NRL	0.57978	-0.570651	0.236737
LYRM9	0.302283	-0.449781	0.519587
PTPMT1	0.802669	0.0331776	0.0954634
HS6ST1	0.549039	-0.127908	0.260396
SLC29A2	0.96048	0.0142379	0.0175119
GJC3	0.65526	1.10944	0.183586
WWOX	0.699762	0.106571	0.15505
TOM1L1	0.558518	-0.0960523	0.252962
ARHGEF16	0.621444	-0.344842	0.206598
SESN2	0.000469241	-0.440117	3.3286
PRH1	0.616063	-0.578192	0.210375
TRAF3IP2-AS1	0.0152185	-1.08844	1.81763
ZMIZ2	0.508442	0.148077	0.293759
SMPDL3B	0.918795	0.0297929	0.0367813
MARC2	0.107823	-0.474207	0.967288
PMS2	0.757663	-0.153412	0.120524
CTTN	0.641948	-0.0474162	0.1925
DHX29	0.515257	-0.118978	0.287976
TRAM1L1	0.289151	0.667838	0.538875
TBC1D15	0.581302	-0.090093	0.235598
ATP2B3	0.918961	-0.295414	0.036703
GJA3	0.280922	0.532449	0.551414
FTSJ1	0.515828	0.107209	0.287495
TBC1D3K	0.641293	0.674671	0.192943
BOP1	0.107032	0.222876	0.970488
STYK1	0.360767	1.87777	0.442773
PLTP	0.374488	-0.226283	0.426562
EPDR1	0.495522	-0.254234	0.304937
F2R	0.533295	0.135211	0.273032
TTC21A	0.572934	0.899454	0.241895
CXCL17	0.853843	-0.652797	0.0686222
RCN1	0.00428912	-0.333957	2.36763
ACTB	7.91715e-05	0.216283	4.10143
XRN2	0.746009	-0.0343433	0.127256
BTBD11	0.726364	-0.149137	0.138846
MAN1B1-DT	0.960006	0.0398024	0.0177262
ZDHHC6	0.201996	0.212802	0.694657
C6orf48	4.2738e-05	-0.486808	4.36919
CD22	0.807129	-1.32203	0.0930573
FLOT2	0.668789	-0.0656821	0.174711
SDF2	0.434075	-0.160367	0.362435
BAIAP2-DT	0.53961	-0.249827	0.26792
IFT43	0.786514	-0.0504279	0.104294
HOXC4	0.700162	0.0711973	0.154802
ADM	0.766263	-0.117127	0.115622
BTBD10	0.224202	-0.294944	0.649361
C17orf97	0.0518871	1.30681	1.28494
ZKSCAN4	0.560735	-0.277	0.251242
RGPD1	0.839845	0.990655	0.0758009
ACAP3	0.989133	-0.00541271	0.00474541
OGT	0.00489811	-0.365581	2.30997
ITGB1BP2	0.938249	-0.279491	0.027682
ARPC5	0.0507726	0.196872	1.29437
STX11	0.574766	-0.536857	0.240509
PLXNA1	0.508292	0.140366	0.293887
DDX21	0.16669	-0.09674	0.778091
BMS1	0.111035	0.219684	0.95454
STOX1	0.258869	-0.517206	0.58692
RET	0.44345	0.493997	0.353155
PPP1R7	0.350951	0.1104	0.454754
PASK	0.932836	-0.023854	0.0301947
CTNND2	0.94696	-0.360243	0.0236682
P2RY1	0.104156	-0.435101	0.982315
CPLANE2	0.222558	-0.950003	0.652557
STRN4	0.472418	0.120217	0.325674
MT1X	0.803237	0.0539698	0.0951561
FECH	0.788742	-0.0515593	0.103065
CASC1	0.510534	-1.45884	0.291975
ABRACL	0.0678597	0.185936	1.16839
LRMP	0.887602	0.503481	0.0517819
TPRA1	0.326915	-0.233966	0.485565
KLLN	0.857579	-0.152895	0.066726
SMIM29	0.575883	-0.141893	0.239666
NF2	0.110204	0.218959	0.957802
UBTD2	0.671531	0.0677535	0.172934
TBC1D22A-AS1	0.870692	-0.369267	0.0601354
CREBRF	0.51911	-0.202315	0.28474
DCBLD1	0.22137	-0.393191	0.65488
VTI1B	0.954401	0.00793925	0.020269
SFXN1	0.101883	0.150822	0.9919
PSMA3	0.0126934	0.205318	1.89642
PIGH	0.573908	-0.0976717	0.241157
AFAP1	0.516566	0.22374	0.286874
COA4	0.0305739	0.21065	1.51465
DICER1	0.315093	0.138515	0.501561
STX17-AS1	0.468434	-0.956214	0.329352
TSR3	0.495634	0.0879281	0.304839
CAPN12	0.909668	-0.372897	0.041117
EXOC7	0.128696	0.215428	0.890436
VPS35	0.829782	-0.018924	0.081036
RNF144A-AS1	0.921712	0.201784	0.0354049
ATRNL1	0.472653	-0.279165	0.325458
BMP4	0.343281	-0.308241	0.46435
ATP5S	0.114103	-0.260953	0.942702
KCNQ1	0.75274	-0.331021	0.123355
MTMR12	0.547075	0.147285	0.261953
BAHD1	0.973178	0.00796631	0.0118078
PCSK7	0.511727	0.151261	0.290962
DISP2	0.368933	-0.617224	0.433052
CDAN1	0.66038	0.194415	0.180206
ZNF316	0.717318	0.112049	0.144288
HSF1	0.35835	-0.127867	0.445692
C6orf120	0.912449	0.0200535	0.0397914
COL4A3	0.599268	-1.08961	0.222379
MAP2K1	0.441478	-0.108991	0.355091
SFTA3	0.166406	0.981242	0.77883
TINF2	0.246859	0.301854	0.607552
SOGA3	0.859104	0.298487	0.0659542
PLOD3	0.231493	-0.281184	0.635462
C1GALT1	0.803971	0.0628894	0.0947594
ZNF629	0.832385	-0.0466021	0.0796756
MAPK13	0.97504	0.0324281	0.0109774
MAP3K21	0.559634	-0.111653	0.252096
RPA3	0.518597	0.051961	0.28517
CORO1A	0.519393	-0.492224	0.284504
VTA1	0.181855	0.167335	0.740274
TMEM51-AS1	0.850188	0.990649	0.0704849
FBXO34	0.40246	-0.239557	0.395277
CTC1	0.509481	0.310229	0.292872
INSM2	0.840924	-0.617109	0.0752432
RAB8B	0.702916	0.108923	0.153097
GPT2	0.18983	-0.242437	0.721634
RNA5S6	0.780769	-0.55125	0.107477
[truncated: 13,869 more rows]
