# Supplementary material for: MLL-AF4 and a murinized pSer-variant thereof are turning on the nucleolar stress pathway
Source: Cell Biosci. 2022 Apr 25;12:47. doi: 10.1186/s13578-022-00781-y (PMC9036721; doi:10.1186/s13578-022-00781-y)
Supplement: Supplementary file 11 — Additional file 11: MA4_A4M volcano. [file 13578_2022_781_MOESM11_ESM.xlsx]

## Sheet: Sheet1
gene symbol	pvalue	log2	minus log 10
MADD	0.178083	0.407311	0.749377
MAST2	0.899857	0.0399837	0.0458267
STRN	0.406377	0.195722	0.391071
PCLAF	0.597294	0.0551427	0.223812
ZNF32	0.357237	-0.202625	0.447043
HIST1H1E	0.517413	0.733642	0.286163
LURAP1L	0.32638	-1.8353	0.486276
PDHB	0.0413338	0.215539	1.38369
MRPL49	0.326331	0.156595	0.486341
SCP2	0.00622913	0.330753	2.20557
CDC42EP2	0.71433	-0.15325	0.146101
RGPD6	0.435649	0.257004	0.360864
PROX1-AS1	0.807297	0.54987	0.0929666
ATP6V1E2	0.750392	0.162445	0.124712
KLHL17	0.494026	-0.379791	0.30625
DBET	0.736083	1.86202	0.133073
NUDT3	0.112246	-0.239099	0.949828
KIF26B	0.852493	0.13574	0.0693089
KLHL35	0.83439	-1.23725	0.0786309
MYOCOS	0.437296	-1.03471	0.359224
EIF4ENIF1	0.30791	0.26176	0.511577
TRIM46	0.190028	-1.76245	0.721183
ARPC2	0.200513	0.10699	0.697857
TSACC	0.991815	0.00556321	0.00356929
CCT3	0.940167	-0.00442988	0.0267951
NFIA	0.394046	-0.173549	0.404453
SLC39A9	0.544718	-0.121335	0.263828
BCLAF1	0.109888	0.152135	0.959051
DIRAS3	0.258713	-2.07092	0.587182
VAMP8	0.566615	0.176016	0.246712
ACTR1B	0.36685	-0.182729	0.435511
RSF1	0.978136	-0.00587462	0.00960078
EMP2	0.152843	-0.253758	0.815754
KCTD11	0.45848	-0.657962	0.33868
SZRD1	0.0368866	0.281073	1.43313
LRP5	0.418458	-0.276887	0.378349
TBCE	0.362248	0.14494	0.440994
PDZD9	0.876873	0.505002	0.0570632
RTKN2	0.766812	0.0601296	0.115311
PNMA8A	0.812272	0.0443994	0.0902988
FARP2	0.224427	0.240862	0.648925
KIAA1324L	0.488192	0.25348	0.311409
SP8	0.788789	-0.182218	0.103039
MIOS	0.688822	0.111249	0.161893
MOB1A	0.92089	0.012797	0.0357923
MAML1	0.324598	0.201942	0.488654
TIAL1	0.864421	-0.0193626	0.0632749
ARMC3	0.747946	-0.90175	0.12613
MELK	0.212155	-0.221159	0.673346
SLITRK5	0.00873946	-0.514488	2.05852
MYL12A	0.031327	0.272011	1.50408
ZNF778	0.545415	0.221919	0.263273
CNOT7	0.397103	-0.123972	0.401096
TMEM184B	0.869576	0.0275821	0.0606927
MTOR	0.251673	-0.223014	0.599163
ZNF768	0.712129	-0.0715766	0.147441
ZNF521	0.53417	0.495732	0.272321
ZNF81	0.920313	0.0737301	0.0360645
KLHDC1	0.269499	-2.36903	0.569443
DRAP1	0.666713	0.0739548	0.176061
LONRF3	0.964565	-0.0342055	0.0156686
MCMBP	0.762376	0.036145	0.117831
FAM171A2	0.727979	0.127447	0.137881
KLHL20	0.807802	-0.0694179	0.0926948
SCHIP1	0.902295	-0.0423699	0.0446514
TOB2	0.866847	-0.0329294	0.0620577
SNAI1	0.371307	1.02301	0.430266
MOCS3	0.828663	0.0771112	0.081622
STAU1	0.0972119	-0.21888	1.01228
CDH26	0.455116	-1.78768	0.341878
PTGIS	0.666326	1.86567	0.176313
ZNF444	0.592783	-0.134227	0.227104
SPTY2D1OS	0.609507	-0.286406	0.215021
RPL26	0.0125301	-0.170313	1.90205
PAQR5	0.562913	-0.21743	0.249559
UBE2J2	0.083407	0.296367	1.0788
TBC1D23	0.541991	0.158431	0.266008
OAZ1	0.0467394	0.136547	1.33032
HS3ST1	0.218285	1.7081	0.660976
CD99	0.789349	-0.026691	0.102731
RPS27	0.276845	0.0840886	0.557763
BET1L	0.0394089	-0.481135	1.40441
RPL23A	0.020683	-0.148249	1.68439
G2E3	0.370462	0.179508	0.431257
ITM2C	0.145423	-0.273451	0.837367
HTR2B	0.725645	2.0805	0.139276
USP37	0.681047	0.108508	0.166823
TTLL4	0.569415	-0.159847	0.244571
HECTD1	0.000569838	-0.723737	3.24425
PEX3	0.207253	0.289977	0.683498
SERPINE2	0.909169	0.0310859	0.0413553
PSMG3-AS1	0.600648	0.337748	0.22138
EID2	0.867868	-0.0311494	0.0615465
CRLF3	0.730654	0.0879003	0.136289
RNPEP	0.185416	0.180008	0.731852
DMRTA1	0.284759	-2.48982	0.545523
NUFIP1	0.866978	-0.0475786	0.0619917
MARS2	0.672657	-0.116284	0.172206
DHRS13	0.665899	-0.196675	0.176592
CACNB3	0.936228	0.0423455	0.0286183
KLRG2	0.277604	0.489618	0.556574
CKMT1B	0.584047	0.105173	0.233552
ADAMTS6	0.177546	-2.38723	0.750689
KPNA6	0.356674	0.098441	0.447728
TMEM80	0.162578	-0.299383	0.788939
TEP1	0.508314	0.37465	0.293868
SIX5	0.27015	-0.467185	0.568394
TOB1	0.234786	0.193104	0.629328
ZFAND4	0.556995	0.302429	0.254149
HEXDC-IT1	0.672352	1.8653	0.172404
ABI1	0.286682	0.196187	0.5426
YME1L1	0.594415	-0.0569118	0.22591
NOTCH2NL	0.0923052	-1.83493	1.03477
ZNF536	0.360193	0.452739	0.443464
KISS1R	0.801749	0.429893	0.0959614
ARID3A	0.0701163	0.314078	1.15418
EPAS1	0.000932108	1.14473	3.03053
STRC	0.533398	2.00826	0.272948
ANKRD20A3	0.787988	0.409242	0.10348
MSRB3	0.184951	0.409685	0.732943
VWA8-AS1	0.92334	0.390131	0.0346385
MTCH1	0.000151424	0.425774	3.81981
NRM	0.526185	-0.203492	0.278861
PPP1R3E	0.124859	-0.635043	0.903581
YBX3	0.119835	-0.12171	0.921415
MAP3K10	0.500541	0.556855	0.30056
NPAS1	0.948586	-0.0364611	0.0229232
GMFG	0.379489	-1.62379	0.420801
TENM1	0.155511	-0.810046	0.80824
PAUPAR	0.0498153	-3.12612	1.30264
FAM215B	0.963828	0.0474375	0.0160004
HPS5	0.0762734	0.610315	1.11763
RANBP1	0.950156	-0.00422667	0.0222051
SPIRE1	0.481649	0.20961	0.317269
BTBD1	0.799188	-0.0441285	0.0973509
LBHD1	0.0870919	0.256558	1.06002
HSD17B10	0.0186262	0.257362	1.72988
AK1	0.185166	0.253818	0.732438
SMC1A	0.72851	-0.0327231	0.137565
GNAT2	0.918368	0.509431	0.0369833
PRPF38B	0.895815	0.0199397	0.0477814
GSTM1	0.263565	-0.371987	0.579112
BCL2L2	0.142662	-0.505526	0.845692
TUBG2	0.917262	0.0570048	0.0375067
ZCWPW1	0.239056	-1.19371	0.6215
AP2S1	0.823653	0.0233294	0.0842556
ITGB8	0.405836	1.03618	0.391649
PON2	0.738837	0.07006	0.131451
COPZ1	0.612748	-0.053064	0.212718
HBP1	0.174272	0.386074	0.758774
GEMIN7	0.968034	0.00886304	0.0141095
SEMA3B	0.105304	-2.95978	0.977556
SMPD2	0.821359	-0.108389	0.0854668
RPL31	0.125586	-0.0954048	0.901059
ZNF343	0.89677	0.0607292	0.0473189
MAB21L1	0.515482	0.515086	0.287786
EMX1	0.488034	0.453388	0.31155
YOD1	0.0135414	0.48315	1.86834
CHM	0.182402	-0.345526	0.73897
SMYD5	0.939516	0.0266211	0.0270957
RAB11FIP5	0.636594	-0.155043	0.196137
DYSF	0.875154	-0.375536	0.0579157
CCDC142	0.0558029	1.10593	1.25334
EBP	0.574059	-0.0776662	0.241043
NCBP2	0.0753282	0.273165	1.12304
HDLBP	0.414342	0.0744291	0.382641
MMP25-AS1	0.843182	-0.108379	0.0740787
MEGF6	0.752948	-0.950752	0.123235
SMIM2-AS1	0.140769	-1.82429	0.851494
MIS18A-AS1	0.881673	-0.196523	0.0546924
AURKC	0.77719	-1.18261	0.109473
CGB1	0.732968	-1.99937	0.134915
AZIN2	0.630583	-0.384013	0.200258
ANO7	0.646458	0.434582	0.189459
GRIK2	0.931374	0.510365	0.0308759
GJB7	0.772018	-0.895064	0.112372
CGRRF1	0.289986	-0.30457	0.537624
FAM76B	0.227785	0.362613	0.642475
DPY30	0.0613948	0.221414	1.21187
PLEKHB1	0.154055	0.546133	0.812325
EP300	0.811436	-0.0459932	0.090746
L3MBTL2	0.492798	0.144032	0.307331
FAM72A	0.653076	-0.123458	0.185036
CACNA1H	0.803495	-0.13816	0.0950167
SLC22A4	0.756349	-0.899315	0.121278
CSNK1G3	0.91099	0.0220121	0.0404865
AGPAT4	0.000584837	-1.01121	3.23297
LRRC37B	0.251113	0.463769	0.600131
MTHFS	0.0141668	-0.436155	1.84873
MIXL1	0.591425	-0.807833	0.2281
BCL7B	0.659557	-0.0877969	0.180748
YKT6	0.268153	0.177108	0.571617
LMO7-AS1	0.400015	-1.64962	0.397924
TBL2	0.194707	-0.259159	0.710619
CHN2	0.149963	0.776411	0.824015
CLEC4F	0.419151	-1.54982	0.377629
TTC13	0.195837	0.325766	0.708106
NQO2	0.216832	-0.293722	0.663876
GALNT2	0.965753	-0.00593497	0.0151337
PEX6	0.213202	0.988279	0.671209
TRIM68	0.548915	-0.306287	0.260495
POMT2	0.18453	-0.435438	0.733934
PSME2	0.213654	-0.266116	0.670288
CYBC1	0.00852688	0.696714	2.06921
PFAS	0.203767	-0.212595	0.690867
HYI	0.936809	0.0244551	0.028349
IRF2	0.505568	-0.356829	0.296221
PFKFB4	0.750541	0.181299	0.124626
PQLC2	0.931372	0.0236961	0.0308767
AP1S3	0.970722	-0.0155454	0.0129052
MAMDC2-AS1	0.781139	-0.821089	0.107272
ANAPC1	0.961226	0.0107945	0.0171745
WEE2-AS1	0.495295	0.892903	0.305136
CAMP	0.754019	1.86127	0.122617
PDIA3	0.0116153	-0.33466	1.93497
WT1-AS	0.332233	1.59411	0.478557
CDC25A	0.909637	-0.015772	0.0411317
PRR36	0.552897	-0.473521	0.257356
EMC6	0.121157	0.200778	0.916652
RPS28	0.0979943	-0.113285	1.0088
TAF1L	0.834388	-1.23726	0.0786319
ACO1	0.907853	-0.0261975	0.0419843
ARNTL2-AS1	0.882853	-0.874504	0.0541114
MARCH8	0.946523	0.0221902	0.0238688
TSHR	0.754021	1.86126	0.122617
ADK	0.779453	-0.0427638	0.10821
SYN1	0.651422	-0.656028	0.186137
PSMB4	0.00400972	0.185089	2.39689
SSBP4	0.94971	0.0156824	0.0224088
GDF15	0.0850865	1.00395	1.07014
PGPEP1	0.808865	0.0929145	0.0921242
MED30	0.111175	-0.466653	0.953993
RAD21	0.370071	0.0955483	0.431714
PEX2	0.0888142	0.39977	1.05152
LAMC2	0.575747	-0.880345	0.239768
SYNJ1	0.108702	0.472329	0.963762
LARP1	0.0128945	-0.222881	1.8896
PAXBP1	0.466096	0.165038	0.331525
QPCTL	0.590802	-0.247727	0.228558
ADH1B	0.882853	-0.874504	0.0541114
SSUH2	0.873036	-0.600719	0.058968
MMP1	0.374844	3.4543	0.426149
PHLPP1	0.469583	0.252651	0.328287
VPS16	0.321209	0.31263	0.493213
ABCB4	0.177699	-2.98058	0.750316
FLT4	0.977659	0.00856986	0.00981263
CCDC58	0.788187	0.0387953	0.103371
C1orf146	0.411181	0.736814	0.385967
CATSPER1	0.98007	0.147624	0.00874287
TBC1D3I	0.359178	-1.95938	0.44469
HLA-DPA1	0.158767	-0.501282	0.79924
GCNT4	0.00332379	4.9183	2.47837
FUT2	0.414914	-1.60027	0.382042
EFCAB5	0.793834	-0.537595	0.10027
ZNF251	0.927083	-0.0535529	0.0328814
SVIP	0.214262	0.180508	0.669054
ANKRD16	0.541863	-0.265532	0.266111
MAN1A2	0.0193111	-0.449411	1.71419
MIER1	0.585183	0.0906643	0.232708
TSNARE1	0.34605	0.86166	0.460861
XKR6	0.983578	0.0137137	0.00719129
RPRML	0.0214581	-1.04596	1.66841
MCPH1	0.415245	-0.296036	0.381696
LYAR	0.118686	-0.226306	0.9256
JSRP1	0.659918	-0.615618	0.18051
MIDN	1.19534e-05	-0.828827	4.92251
PCDHGA11	0.4322	-1.4314	0.364316
HDHD5	0.109813	-0.248059	0.959346
HADHA	0.449286	-0.0904795	0.347477
PSMB9	0.336743	-1.42951	0.472701
SORBS1	0.290517	-0.672696	0.536828
SCARNA22	0.408587	0.422722	0.388715
EAF1-AS1	0.63154	0.878558	0.199599
MAGED4B	0.0357281	0.509793	1.44699
WDR31	0.46848	0.718502	0.329309
RNF128	0.721914	0.118516	0.141514
BEX2	0.000954161	-0.491822	3.02038
MORC4	0.308806	-0.206091	0.510315
POLE3	0.997535	0.000343718	0.00107205
PLA2G12B	0.696385	-2.28054	0.157151
PDK4	0.520489	-0.803028	0.283589
CTDSP1	0.219244	-0.348514	0.659071
PDZD4	0.329733	-0.692013	0.481837
CREB5	0.608015	0.103962	0.216086
CES3	0.372054	-0.577126	0.429394
KSR1	0.0674715	0.834033	1.17088
HMGA1	1.47554e-05	-0.421331	4.83105
FGFR2	0.934828	-0.0219868	0.0292684
PARP14	0.954173	-0.283655	0.0203729
DHX8	0.513611	0.132916	0.289365
MEF2D	0.705087	-0.111839	0.151757
CCDC183	0.271342	-0.985812	0.566483
SLC35C2	0.670321	-0.105107	0.173717
CDKN2B	4.7849e-22	2.42395	21.3201
IFNA16	0.725645	2.0805	0.139276
CDKN2A	0.133258	-0.112024	0.875306
AMMECR1	0.0454584	0.380595	1.34239
CHRDL1	0.502388	0.929711	0.298961
PLD6	0.584565	-0.141718	0.233167
HBZ	0.106631	-3.34784	0.972117
PNPLA7	0.297526	-2.48892	0.526474
DNTTIP2	0.0999889	0.247643	1.00005
SUB1	0.197708	0.0941563	0.703975
GOLPH3	0.585387	-0.0977508	0.232557
FMO4	0.411724	0.609113	0.385394
MED14OS	0.93011	0.10487	0.0314657
SKIDA1	3.25009e-08	2.01433	7.48811
SPAG4	0.103277	1.47514	0.985996
HIST1H2BC	0.741966	0.342562	0.129616
SDHA	0.265232	0.166682	0.576374
NPIPB12	0.882744	0.0676197	0.0541655
RPL6	0.146763	-0.0846965	0.833383
SNX5	0.629161	0.047866	0.201238
ORAI3	0.806843	0.091442	0.0932112
TRABD2B	0.791722	-0.227783	0.101427
CDK18	0.0702433	-0.702755	1.15339
GPR89A	0.416301	-0.192181	0.380593
FGF8	0.71396	-1.09497	0.146326
NPM3	0.000397134	-0.473932	3.40106
SUPV3L1	0.908011	-0.021593	0.0419089
FAM122C	0.26338	-0.63684	0.579417
FAM122B	0.432236	0.12762	0.364279
LACTB	0.174652	-0.446941	0.757826
CORO2B	0.482957	1.43773	0.316091
ABCA7	0.421278	-0.587228	0.375431
ARHGEF1	0.449458	0.262734	0.347311
XAB2	0.85169	-0.0879028	0.0697187
TOR1AIP1	0.413497	-0.157404	0.383527
RGS16	0.000238368	-1.30574	3.62275
ROPN1	0.754019	1.86127	0.122617
THAP9	0.892736	-0.0705315	0.049277
TSPYL1	0.0133195	0.243682	1.87551
RNF187	0.366121	0.0869299	0.436375
MAK	0.976103	-0.0265315	0.0105041
RSPH4A	0.846211	0.42775	0.0725214
RWDD1	0.464286	-0.0800915	0.333215
FOXP1-AS1	0.83439	-1.23725	0.078631
CFAP54	0.807842	0.531647	0.0926738
FUNDC1	0.0607588	0.311877	1.21639
KCNF1	0.75402	1.86127	0.122617
SCAMP5	0.00939525	-1.05637	2.02709
SUPT7L	0.730695	0.0617113	0.136264
HGF	0.595215	3.10802	0.225326
SPIN2A	0.981367	0.0234489	0.00816871
NTPCR	0.892798	-0.0170541	0.0492469
ABCB10	0.190197	-0.191696	0.720797
COG2	0.00191521	0.582218	2.71778
CAPN9	0.596114	1.87069	0.224671
KDM6A	0.10057	0.426752	0.997531
ADGRA3	0.192534	0.431718	0.715492
EME2	0.0863134	-1.09665	1.06392
COMTD1	0.249194	-0.226762	0.603463
MR1	0.23362	0.452965	0.63149
PTRH1	0.875126	-0.0658204	0.0579294
PARP11	0.25512	0.42915	0.593256
PNLIPRP1	0.85178	-0.878735	0.0696728
PPP1R32	0.234262	1.89788	0.630298
ZNF48	0.216475	-0.331111	0.664592
MTFR1	0.258509	-0.212555	0.587524
KCNIP4	0.127938	-2.96904	0.893
SPTLC1	0.163156	-0.247079	0.787398
NFATC2	0.420568	-2.20066	0.376163
RIMS4	0.0927928	0.600096	1.03249
MAGEA12	0.86573	0.441786	0.0626177
VEGFA	9.04566e-05	-0.947417	4.04356
JMJD6	3.47623e-05	0.754056	4.45889
GNPTG	0.533681	0.149882	0.272718
SENP7	0.571249	0.210606	0.243174
DDOST	0.50544	-0.0648004	0.29633
COG5	0.51069	-0.186256	0.291843
DIRC2	0.931298	0.0310298	0.0309112
SCG3	0.379324	-1.03988	0.420989
GABRA3	0.882853	-0.874504	0.0541114
SOX21	0.231423	0.743068	0.635594
RNF41	0.764286	-0.0703415	0.116744
SLC2A4	0.119113	-1.73501	0.924039
TRIM49	0.834388	-1.23726	0.0786319
TMEM129	0.0823673	-0.42042	1.08424
SPRY3	0.483714	1.05888	0.315411
PPIC	0.067144	-0.306328	1.17299
SLC28A3	0.725645	2.0805	0.139276
NUP214	0.560805	-0.13465	0.251188
FAM78A	0.486926	-0.51267	0.312537
GSAP	0.605211	-1.99282	0.218094
RRBP1	0.783351	-0.0621949	0.106043
FBXO48	0.409528	0.366887	0.387717
UQCC3	0.733228	-0.0590499	0.134761
ZNF155	0.232398	-1.51781	0.633767
NFIX	0.729963	0.141137	0.136699
CEP97	0.283222	0.312619	0.547873
TSFM	0.72727	-0.0510748	0.138304
SEMA6B	0.0720542	-2.32529	1.14234
DHDH	0.49305	-0.818652	0.307109
NUCB1	0.339232	-0.176818	0.469504
TULP2	0.487477	1.09894	0.312046
TWF2	0.116089	-0.372458	0.93521
ZNHIT1	0.544003	0.0819893	0.264399
CLDN15	0.511408	-0.284064	0.291233
IRX3	0.244838	-0.397213	0.611122
EIF4EBP1	9.6121e-09	-0.652632	8.01718
P2RX2	0.469661	2.08726	0.328215
VTRNA1-3	0.0819988	1.13276	1.08619
MXD4	0.0714566	0.29122	1.14596
ABHD2	0.0308834	0.440844	1.51027
WDR93	0.775225	-0.665829	0.110572
FANCI	0.58953	0.0643551	0.229494
POLG	0.679881	0.0829797	0.167567
ACSF2	0.277095	-0.444819	0.557371
FAM102A	0.8227	-0.11151	0.0847587
TMEM92	0.924676	-0.17818	0.0340105
PIP5KL1	0.322906	1.53809	0.490924
HPRT1	0.487878	-0.0575695	0.311689
SAMD14	0.940806	0.0991301	0.0264998
EIF1B-AS1	0.770904	-0.45176	0.113
PLK1	0.179914	0.17246	0.744935
RNU6-2	0.443796	-0.670718	0.352816
CLPX	0.901182	0.0275862	0.0451876
YY1AP1	0.762067	-0.0680576	0.118007
KBTBD8	0.839074	0.0909748	0.0761999
FAM19A4	0.737816	-0.904838	0.132052
EOGT	0.306061	0.398063	0.514193
IST1	0.0347809	0.341113	1.45866
RC3H2	0.000137604	0.552895	3.86137
INKA2-AS1	0.727946	0.313829	0.137901
CGNL1	0.972554	0.0354459	0.0120861
MKRN2OS	0.725643	2.08051	0.139277
DENND5A	0.241448	-0.234123	0.617177
TMPRSS2	0.754019	1.86127	0.122617
MYADM	0.038705	-0.611547	1.41223
VAX1	0.827552	-0.160378	0.082205
ADD3	0.688638	0.0713907	0.162009
CHIC1	0.773803	-0.155923	0.11137
DENND4C	0.747148	0.100402	0.126593
IGFBPL1	0.752691	-1.15225	0.123383
CLCN3	0.924376	-0.0188287	0.0341516
BAZ2B	0.47467	0.203187	0.323608
YEATS2-AS1	0.876881	-0.875234	0.0570594
GRK3	0.174489	0.363802	0.758232
SLC39A8	0.28736	0.200307	0.541574
ENPP4	0.424616	-0.226543	0.372004
IFNGR2	0.297408	-0.170218	0.526648
SLC25A16	0.0404313	0.592843	1.39328
SHLD3	0.70207	0.202494	0.15362
LOXL1	0.937565	-0.0478309	0.0279988
ANKRD29	0.540604	-0.387219	0.267121
CCDC181	0.292529	-0.351974	0.533831
JAKMIP1	0.640949	-0.374122	0.193176
STAG3	0.444262	-1.79421	0.352361
CLVS2	0.306911	-1.01495	0.512988
SLC10A7	0.015186	-1.09444	1.81856
C16orf87	0.869601	-0.0297737	0.06068
TBC1D32	0.379083	0.298993	0.421265
MFAP3	0.295518	0.835513	0.529417
ELOVL6	0.661901	-0.101652	0.179207
PFKFB3	0.943866	-0.0159631	0.0250896
TRA2A	0.410763	0.0883864	0.386408
ZNF627	0.932889	-0.0401722	0.0301702
ZNF789	0.499548	-0.331665	0.301423
WDHD1	0.222224	0.258588	0.653209
SEMA3C	0.462118	0.258326	0.335247
UBE2Q1	0.0584045	0.239831	1.23355
IL6R	0.0553559	1.49385	1.25684
ADAR	0.547316	0.0688478	0.261762
ARPC5L	0.453873	0.114872	0.343066
MRPS18A	0.780135	-0.0554154	0.10783
SART1	0.992645	0.00168178	0.003206
NAPA	0.870991	-0.875992	0.0599861
CDC37	0.6159	-0.0508758	0.21049
RABAC1	0.0654588	-0.28733	1.18403
GFPT2	0.709867	-0.167985	0.148823
SLC19A3	0.167221	2.42153	0.776708
SYNGR2	0.528209	0.0823474	0.277194
NUP210	0.420591	0.137384	0.37614
SIPA1L2	0.840804	0.0720337	0.0753055
CACNG7	0.816124	1.06222	0.0882438
CCDC146	0.672666	-0.4862	0.172201
LGALS3	0.620105	-0.3146	0.207535
UBQLN2	0.746917	-0.0517851	0.126728
RILPL1	0.824456	-0.0862827	0.0838324
CMTM1	0.946792	0.076241	0.0237454
TXLNA	0.00376894	0.391725	2.42378
MTBP	0.329779	-0.435179	0.481777
SNTB1	0.101524	-0.946826	0.993431
RNU4ATAC	0.552518	0.560875	0.257654
INPP5E	0.507382	0.188513	0.294665
MNAT1	0.224267	-0.208567	0.649234
MID1	0.0179064	-0.30941	1.74699
CYP2C8	0.725645	2.0805	0.139276
MFSD13A	0.777723	0.0811483	0.109175
CBWD1	0.156718	0.220272	0.804882
MYOF	0.0220122	4.55508	1.65734
PTPRG	0.129445	-0.493365	0.887914
ANKRD42	0.751764	0.121101	0.123919
PDLIM7	0.31111	0.278608	0.507086
SRP72	0.414074	-0.0949536	0.382922
IL18BP	0.734088	0.510349	0.134252
CNP	0.642972	0.0671958	0.191808
CD3EAP	0.283875	-0.236244	0.546872
MNX1-AS2	0.499526	0.711684	0.301442
RAP1A	0.410759	0.119056	0.386413
MRPS30	0.663907	-0.0696249	0.177892
GATD3B	0.413798	-0.152282	0.383212
NNT	0.144939	-0.242452	0.838815
HDAC1	0.0983769	0.149525	1.00711
C1GALT1C1L	0.69421	-0.494996	0.158509
ANK3	0.665708	-0.130637	0.176716
PALM	0.484311	0.251931	0.314875
GADD45B	0.70346	-0.175084	0.15276
SLC7A9	0.533483	-2.26609	0.272879
BUD31	0.999392	0.00010149	0.000263955
PDAP1	0.668336	0.0547197	0.175005
ALDH3A2	0.405636	-0.134157	0.391863
PTCD1	0.540679	-0.176441	0.267061
CD59	9.34693e-05	0.563097	4.02933
SNHG7	2.29066e-11	-0.93799	10.64
C7orf31	0.993037	0.00406117	0.00303449
FALEC	0.848896	-0.406559	0.0711454
SYTL1	0.907193	-0.106778	0.0423001
RARS	0.0180448	0.274544	1.74365
WWC1	0.112874	-0.615714	0.947405
SRGAP2	0.0223338	0.485699	1.65104
H2AFY	0.391947	0.0822072	0.406773
SCN9A	0.496044	-0.444736	0.30448
RASSF6	0.805886	0.549087	0.0937266
SDC2	0.237264	-0.168516	0.624768
UHRF1BP1L	0.658749	0.15084	0.18128
NOP2	0.765627	0.11004	0.115983
GAPDH	0.0143097	-0.141375	1.84437
CHD4	0.328349	-0.105591	0.483665
AQP9	0.725645	2.0805	0.139276
SLC47A1	0.228209	-0.378784	0.641668
KPNA1	0.0683394	0.322417	1.16533
RPGR	0.0794535	0.653651	1.09989
CHIC2	0.331158	0.300818	0.479965
BRCA1	0.448922	0.123035	0.347829
ORAOV1	0.586617	0.179638	0.231645
ALDH1A3	0.993776	-0.00511649	0.00271147
RNF185	0.292173	0.276912	0.534359
SHISAL1	0.984439	-0.0136253	0.00681114
CDR1	0.83439	-1.23725	0.078631
BOLA3	0.507002	-0.0691703	0.294991
CDC42EP3	0.622447	-0.167924	0.205897
DLEC1	0.754019	1.86127	0.122617
ZSCAN21	0.92559	0.0334638	0.0335816
YBEY	0.0991683	-0.635533	1.00363
PLSCR4	0.552976	0.504556	0.257293
SATL1	0.777082	-0.519768	0.109533
TCTE3	0.327257	-0.560883	0.485111
UBE2G2	0.880226	-0.017795	0.0554061
SMIM10	0.950563	0.0174453	0.0220193
TMEFF1	0.0226173	-0.594149	1.64556
SETD2	0.181302	-0.334709	0.741597
REEP4	0.541396	-0.160156	0.266485
TMEM30A	0.419546	0.121001	0.37722
COX7A2	0.01578	0.14757	1.80189
GMDS	0.393991	-0.173457	0.404513
WRB	0.229763	0.197463	0.63872
TNRC18	0.00535693	0.850482	2.27108
BLMH	0.728792	0.0529253	0.137397
BBOX1-AS1	0.867538	-0.124006	0.0617113
GALNT12	0.209237	-0.491696	0.679362
NTN4	0.137297	2.53749	0.862338
JKAMP	0.44977	0.149762	0.347009
ENPP3	0.674873	-1.02664	0.170778
ZNF35	0.665467	-0.324683	0.176873
ABCA6	0.931214	0.277793	0.0309505
ABCA5	0.310215	0.314463	0.508337
MYLPF	0.385948	-0.673039	0.413472
WASHC5	0.385347	0.165197	0.414148
RSBN1L	0.216026	-0.220038	0.665494
RPP25L	0.176731	-0.219863	0.752688
ATP5MF	0.000102759	0.267226	3.98818
SETD6	0.959269	0.0117705	0.0180597
SPTSSA	0.00157573	-0.562397	2.80252
PABPC4	0.562766	0.0568653	0.249672
LAMA1	0.495995	-0.263453	0.304523
LRCH4	0.114974	-0.67265	0.939399
TNFAIP8L3	0.567075	1.30625	0.24636
ZNRF3	0.538972	-0.167358	0.268434
ADPRHL2	0.317094	-0.227807	0.498811
ARSD	0.573	2.73963	0.241845
PNPLA4	0.148041	-0.746083	0.829619
MPPE1	0.502097	-0.244127	0.299213
KIAA0895	0.81847	-0.0778829	0.086997
UBR1	0.811388	0.0752506	0.0907713
SNAPC4	0.459937	-0.238325	0.337301
TCHH	0.042386	4.21859	1.37278
VCPKMT	0.524939	-0.238446	0.279891
SOS2	0.417859	-0.303502	0.378971
DAD1	0.0154289	0.206842	1.81166
SEC23IP	0.298025	0.158328	0.525747
SPATA20	0.796998	0.116096	0.0985426
CACNA1G	0.476046	1.13793	0.322351
SYCE3	0.6455	-0.921858	0.190104
TOGARAM1	0.695383	-0.177579	0.157776
SLC9B1	0.750366	0.628333	0.124727
EVL	0.287277	-0.219135	0.5417
H2AFZ	0.00158898	0.186833	2.79888
DNAJB14	0.123071	-0.431991	0.909846
MRPL33	0.0397952	0.233109	1.40017
SNHG3	0.00419651	-0.294021	2.37711
GLMP	0.00801305	0.44387	2.0962
BDH2	0.1625	0.365309	0.789147
PICK1	0.677333	-0.108945	0.169197
DEPDC5	0.916803	-0.0431126	0.037724
GNA13	0.507626	-0.123689	0.294456
TTC28	0.136907	0.321695	0.863575
HOXB8	0.0823747	0.541754	1.08421
SNRPD2	0.213766	0.0855005	0.670061
OPA3	0.10611	0.439737	0.974244
FOSB	0.517267	0.903521	0.286285
EML2	0.791309	-0.101878	0.101654
RTN2	0.689505	0.15456	0.161462
TMC4	0.441266	-2.21238	0.3553
PEPD	0.409755	0.123796	0.387476
CYP2S1	0.546464	0.43452	0.262438
AXL	0.512255	-0.757882	0.290513
NFKBID	0.290032	0.82747	0.537553
URB1-AS1	0.357368	-0.324634	0.446884
ACY1	0.665467	-0.999279	0.176874
SIRT1	0.000387572	0.651506	3.41165
MOGS	0.713472	0.0757954	0.146623
GEMIN8	0.88117	0.0548931	0.0549402
C8orf31	0.585682	0.502864	0.232338
DLGAP1-AS1	0.501508	1.5158	0.299722
AVIL	0.81634	0.416158	0.0881291
ZNF655	0.910309	-0.0232568	0.0408114
ROR1-AS1	0.895224	0.415977	0.0480684
RNU5D-1	0.261722	2.92291	0.58216
HSFX4	0.240186	3.56723	0.619452
CIB2	0.256577	-0.28867	0.590782
WASF2	0.435254	0.122973	0.361257
PIGV	0.025054	0.987542	1.60112
HOXD3	0.667294	0.602983	0.175683
CHN1	0.794418	-0.082705	0.0999511
MTX2	0.704754	0.0639751	0.151962
PDE11A	0.466817	-0.780594	0.330854
GTF3A	0.250953	-0.129843	0.600408
RASL11A	0.575654	-0.376174	0.239839
GMPPB	0.192532	-0.316445	0.715498
STEAP2	0.436841	-0.353946	0.359676
NEU4	0.754019	1.86127	0.122617
ZNF622	0.0626122	-0.49435	1.20334
NEO1	0.817312	-0.0606395	0.0876123
SNX33	0.188163	0.628692	0.725466
KLHL15	0.708097	0.0816899	0.149907
FBXO45	0.984578	-0.00546628	0.00674996
KCNB1	0.501726	1.36749	0.299534
CUL7	0.590337	-0.247134	0.2289
ZNF260	0.532897	-0.217974	0.273357
TRIM36-IT1	0.686022	-1.04699	0.163662
NCAN	0.226878	2.8157	0.644207
PIGS	0.0967149	0.220808	1.01451
TSEN2	0.822162	0.0672536	0.0850424
ZDHHC1	0.822344	0.232476	0.0849467
TPPP3	0.623648	-0.523263	0.20506
ADPRM	0.482994	-0.315239	0.316058
SLC35B1	0.0025695	-0.392136	2.59015
CYSTM1	0.6666	0.0720831	0.176134
ZNF584	0.781527	0.1273	0.107056
ENDOU	0.922474	0.509747	0.035046
SLC26A10	0.971201	0.0481106	0.0126908
ACVR1B	0.254666	-0.294994	0.594029
OS9	0.199795	0.165502	0.699416
IGF2	0.51793	0.4169	0.285729
LSG1	0.105928	0.49808	0.97499
SPHAR	0.25126	0.308666	0.599877
VWA8	0.000796484	-1.17892	3.09882
RGCC	0.874176	-0.0745485	0.058401
ZXDB	0.880478	0.0561961	0.0552815
IRF9	0.0942168	1.46254	1.02587
ZNF568	0.143324	1.25355	0.84368
KLHL5	0.749751	-0.107273	0.125083
FAM149A	0.843028	0.170471	0.0741579
EFHB	0.653584	-1.08158	0.184699
SNTG1	0.83439	-1.23725	0.0786309
IFT80	0.159596	0.386638	0.796977
SLC2A8	0.44397	-0.218654	0.352647
STXBP1	0.220445	0.289472	0.656701
IK	0.17914	0.193155	0.746808
MOB3A	0.68633	0.160825	0.163467
KRCC1	0.957474	0.0200683	0.0188729
RAB5C	0.259336	0.168409	0.586137
KAT2A	0.372567	0.177672	0.428796
DHX58	0.330542	2.0754	0.480774
PM20D2	0.00367422	-0.389161	2.43483
RARS2	0.901576	-0.0306102	0.0449975
HAGH	0.10648	0.278022	0.972732
ANP32C	0.264241	-2.49142	0.577999
ZNRD1	0.969658	0.00705872	0.0133812
EEFSEC	0.421375	0.283368	0.375331
USP53	0.583578	0.140258	0.233901
SETD7	0.00290339	-0.540601	2.53709
ACTR3B	0.842332	0.0460296	0.0745166
ARHGAP24	0.906419	-0.155003	0.042671
PELI2	0.429511	0.278614	0.367026
ZNF318	0.642419	0.142761	0.192182
ACTR5	0.52937	0.208558	0.276241
WFDC2	0.536947	-1.98734	0.270069
SHISAL2B	0.25393	0.724256	0.595286
FAM83D	0.201004	0.287648	0.696796
PPP1R16B	0.985464	-0.0159819	0.0063594
TSPAN4	0.642205	-0.167852	0.192326
KNL1	0.140228	0.360329	0.853164
ALG14	0.203983	0.266892	0.690405
HAUS2	0.657075	-0.103812	0.182385
RTF1	0.037919	-0.328425	1.42114
PARP6	0.100361	-0.519625	0.998436
POP7	0.307334	-0.13853	0.512389
BNC2	0.424874	-0.484308	0.37174
FAM222B	0.306453	0.248979	0.513635
HECTD4	0.557849	0.159486	0.253483
SLC12A9-AS1	0.333499	-1.36524	0.476906
ARHGAP4	0.695236	0.408935	0.157868
NEDD8-MDP1	0.311787	0.267031	0.506142
LRPPRC	0.00570109	-0.299486	2.24404
MZF1-AS1	0.620564	-0.478758	0.207213
C19orf70	0.175319	0.184778	0.756171
SH3RF3-AS1	0.548046	1.39346	0.261183
ATRX	0.354617	0.13717	0.45024
OGFR-AS1	0.882854	-0.874501	0.0541112
RALB	0.228342	0.311358	0.641414
TMEM218	0.47691	0.165739	0.321563
ACR	0.910859	0.5088	0.0405487
CABP7	0.62253	-1.21554	0.205839
RPL3	0.000182748	-0.226337	3.73815
ZMAT5	0.828889	0.0631259	0.0815035
R3HCC1	0.442828	0.17805	0.353765
FANK1	0.396218	1.94079	0.402066
SASS6	0.223937	-0.254844	0.649875
UCKL1-AS1	0.354331	2.9265	0.450591
CFAP65	0.697582	-0.319437	0.156405
PRSS16	0.621094	-0.229304	0.206843
SRPRA	0.726361	-0.0540831	0.138847
DLX3	0.146357	-2.97428	0.834585
SPA17	0.152172	0.338446	0.817664
HUWE1	0.150281	-0.188249	0.823095
FBXL19-AS1	0.26056	-1.19064	0.584093
HEXDC	0.307984	-0.37451	0.511472
TIAM1	0.411084	0.206023	0.386069
SNHG15	0.00690763	-0.450357	2.16067
DTYMK	0.257859	0.12283	0.588617
ATG4B	0.49218	-0.144738	0.307876
ING5	0.27885	-0.255215	0.554629
TAP1	0.543907	-0.198313	0.264476
OCLN	0.0789325	0.589237	1.10274
CFAP299	0.777912	-0.893563	0.10907
IFNA14	0.848783	-0.879205	0.0712035
C11orf71	0.268167	-0.459628	0.571594
HARBI1	0.966383	0.0246397	0.0148505
MPG	0.675897	-0.0692353	0.17012
C4orf33	0.100212	0.444908	0.99908
FRMD4A	0.695889	-0.178783	0.15746
HNRNPU	0.37175	0.0599595	0.429749
ANGEL1	0.457557	0.24445	0.339555
TUT1	0.895411	0.0379424	0.0479776
SIGLEC10	0.754019	1.86127	0.122617
IP6K2	0.704801	0.0630486	0.151933
MGAT5B	0.687932	-0.37235	0.162455
FANCD2OS	0.721851	1.86267	0.141552
PRRT3	0.152438	0.655744	0.816905
TOP1MT	0.0901934	-0.412853	1.04483
IL17RE	0.269103	-2.36929	0.570082
CRELD1	0.0498723	-0.714558	1.30214
SRP68	0.200673	-0.15773	0.697511
MRPL43	0.0142723	0.28527	1.84551
ST6GALNAC4	0.0413652	-0.729657	1.38337
KANTR	0.822109	-0.0780871	0.0850706
DNAJC27	0.747073	0.183316	0.126637
DAB2IP	0.749772	0.123588	0.125071
POMC	0.330734	1.49163	0.480522
RAD51	0.960474	0.056906	0.0175142
DDN-AS1	0.230248	1.52273	0.637804
GALNT8	0.966102	0.0605935	0.014977
CCNB2	0.0484234	0.304078	1.31494
PLEKHF1	0.0537389	-1.78963	1.26971
RNF111	0.486709	0.236922	0.312731
MAP2K6	0.476051	-0.205146	0.322346
CLMN	0.152835	-0.708773	0.815778
PLCH2	0.845128	-0.879792	0.0730777
SGCE	0.857584	0.0568721	0.0667235
RBM48	0.838585	0.0722365	0.0764527
CASD1	0.746053	-0.124121	0.12723
FLYWCH2	0.627512	0.115936	0.202378
SLFN5	0.987032	-0.0114003	0.00566871
PAQR4	0.538262	-0.157944	0.269006
AGAP1	0.882937	0.0414525	0.0540703
SKA3	0.438529	0.201461	0.358002
PRAP1	0.882853	-0.874505	0.0541114
MICU2	0.378434	0.160173	0.42201
SLITRK1	0.899071	0.341687	0.0462062
GALNT11	0.255773	0.201249	0.592145
TMEM151B	0.821435	-1.22671	0.0854266
ANGPT1	0.816768	-1.22266	0.0879013
TMED4	0.321656	-0.125127	0.492609
SETD4	0.640671	0.153099	0.193365
DNAJB11	2.8516e-10	-1.02034	9.54491
MASP2	0.852465	0.661477	0.0693235
RORA-AS1	0.214372	2.4934	0.668833
NEAT1	0.64306	0.0890286	0.191748
PRPF6	0.268737	0.193894	0.570672
CTSZ	0.617765	0.336777	0.209177
ABCC11	0.787028	-0.679545	0.10401
TENT4B	0.263039	0.244623	0.57998
RASGRP4	0.641689	2.73302	0.192675
CTDSP2	0.300334	0.220235	0.522395
CKAP5	0.686952	-0.0531209	0.163074
HTR1D	0.490612	1.03349	0.309262
OR10A2	0.730895	-1.12143	0.136145
CHCHD7	0.000158255	0.590584	3.80064
ZNF33B	0.23433	-0.291278	0.630173
FMC1	0.00365191	-0.306065	2.43748
IQSEC2	0.695075	0.180145	0.157968
MFSD14B	0.0331084	0.32336	1.48006
ZNF682	0.476833	-1.98077	0.321634
SRC	0.935077	-0.0365295	0.0291527
PGAP1	0.0280801	-0.617647	1.5516
GRASP	0.644701	0.427988	0.190642
ZNF772	0.92341	0.0746563	0.0346054
AP2B1	0.294137	0.185073	0.531451
LIAS	0.704599	0.135706	0.152058
TMEM156	0.83439	-1.23725	0.078631
TAC1	0.22024	-2.49585	0.657105
PDS5A	0.0279163	-0.349705	1.55414
ZYG11A	0.279468	0.422655	0.553668
ARRDC1-AS1	0.791529	-0.101931	0.101533
FAN1	0.292656	-0.361808	0.533642
EIF1AY	0.882853	-0.874505	0.0541114
ZNF707	0.807323	0.198643	0.0929528
CDK5R1	0.640235	-0.200886	0.19366
TNFRSF1B	0.497677	1.97485	0.303053
PLPP1	0.805985	-0.0833345	0.0936729
STX18-AS1	0.607392	0.496943	0.216531
PHGDH	2.07885e-07	-0.449032	6.68218
CSAG3	0.714621	-0.20234	0.145924
IREB2	0.139658	-0.189309	0.854934
ZSWIM3	0.437192	0.496518	0.359327
ZNF750	0.750611	0.845119	0.124585
RNF157	0.0194736	-0.636337	1.71055
ULK1	0.189227	0.3973	0.723016
SECTM1	0.967262	-0.0346571	0.0144559
CBX8	0.10329	-0.462302	0.985941
BANP	0.0104124	-0.819822	1.98245
PPP1CA	0.147485	0.154947	0.831251
HCFC1	0.108334	0.197325	0.965237
TAS1R1	0.882853	-0.874504	0.0541114
UQCRH	0.612975	0.0290734	0.212557
SLC39A4	0.139215	-0.395765	0.856313
GPAM	0.162438	0.378719	0.789313
OBSCN-AS1	0.451492	-1.02646	0.34535
MRPL55	0.815447	-0.0250701	0.0886044
KIAA1191	0.763377	-0.0361404	0.117261
CNOT6	0.452431	0.117141	0.344447
PRKG1-AS1	0.859477	-0.594551	0.0657659
TP63	0.834388	-1.23726	0.0786319
SLC25A22	0.7347	0.0889559	0.13389
DDX24	0.826853	0.0272615	0.0825717
C21orf91	0.671286	0.108125	0.173092
EPHA8	0.136856	-0.948341	0.863736
OSBPL3	0.405682	0.25892	0.391814
TEX15	0.501106	-0.494743	0.300071
HCN4	0.281081	-2.02553	0.551168
S100P	0.909572	0.210743	0.0411628
NTS	0.629361	0.593648	0.2011
APOBEC3D	0.375791	0.899245	0.425053
FARS2	0.686999	0.133203	0.163044
CD81	0.253697	0.107884	0.595684
ST6GAL2	0.681382	-1.68645	0.16661
DERA	0.501918	0.143142	0.299367
KLHL12	0.152816	0.305155	0.815831
RGS4	0.529597	0.741328	0.276055
CTBS	0.00290658	-1.13096	2.53662
SSX2IP	0.361243	-0.170752	0.4422
IGSF21	0.820604	-0.370954	0.0858661
SHLD1	0.895361	-0.0664155	0.0480019
JMJD1C	0.596352	0.184397	0.224497
EEF2K	0.455424	-0.226307	0.341584
MEFV	0.725645	2.0805	0.139276
CRYM	0.0549595	1.59844	1.25996
MTMR8	0.648862	-0.689098	0.187848
ZNF416	0.449077	0.636299	0.347679
MARCH3	0.344583	0.449987	0.462707
YPEL2	0.529516	-0.337393	0.276121
SYCP3	0.798663	-0.544783	0.0976362
NEDD1	0.126151	0.363449	0.899109
GAS2L3	0.760112	-0.111884	0.119122
CHMP1A	0.0130457	0.473194	1.88453
SUGP2	0.45737	0.124371	0.339733
CAMKMT	0.111121	0.618214	0.954204
UGGT2	0.0306259	-0.731472	1.51391
ZFP14	0.611978	0.294671	0.213264
COL25A1	0.0105208	-1.26621	1.97795
SOCS6	0.13543	-0.620728	0.868286
LMNB2	0.486305	-0.076689	0.313091
CPNE1	0.520171	-0.10575	0.283854
MVK	0.0250336	0.478628	1.60148
SEPSECS	0.341708	0.49833	0.466344
B4GALT6	0.0495069	0.425484	1.30533
GLB1L2	0.15003	-0.523063	0.823821
LRRC49	0.676844	-0.155612	0.169512
PPP6R1	0.135105	-1.68055	0.869328
TUBGCP4	0.190962	0.268651	0.719053
DGCR2	0.0782947	0.28283	1.10627
CNTNAP4	0.83439	-1.23725	0.078631
FAM83F	0.845553	0.647937	0.0728591
HINFP	0.537851	-0.176485	0.269338
BSG	0.86768	-0.0155026	0.0616402
PPL	0.752093	0.511799	0.123729
EEF2KMT	0.645671	-0.155458	0.189989
CYP4X1	0.924386	-0.17356	0.0341467
ZNF75D	0.116956	0.644853	0.931976
ETFRF1	0.686721	-0.104857	0.16322
UNC50	0.0810284	-0.301895	1.09136
TIMMDC1	0.678406	0.0555113	0.16851
NUFIP2	0.946805	0.00933007	0.0237395
KLHDC4	0.544929	-0.156955	0.26366
MCM4	0.656456	-0.0376957	0.182794
ARF3	0.254445	0.140448	0.594407
PIK3R4	0.124107	0.353161	0.906205
ZNF775	0.232236	0.447628	0.63407
PIWIL1	0.517559	2.00092	0.286041
ZNF777	0.94367	0.0235644	0.02518
BLOC1S5-TXNDC5	6.15328e-06	-0.448616	5.21089
TRAPPC2	0.838354	0.0451467	0.0765728
ZNF605	0.278223	-0.695039	0.555606
LRP10	0.583332	0.153899	0.234084
PEX11G	0.772472	-0.222847	0.112117
PIGT	0.00102111	0.519186	2.99093
SVIL	0.387946	0.428132	0.411229
FSIP1	0.793321	-0.536772	0.100551
MATN4	0.149029	-3.06365	0.82673
SLC17A7	0.725489	0.424796	0.139369
PELI1	0.147009	0.448525	0.832657
PCSK6-AS1	0.184427	-1.7562	0.734176
PHLDB1	0.525882	0.239119	0.279112
ANKRD13A	0.591732	0.127508	0.227875
EFCAB10	0.0491268	-1.63186	1.30868
APBA1	0.746799	-0.376392	0.126796
PAPOLB	0.956082	0.0589512	0.0195049
TCF7L1	0.547057	-0.317865	0.261967
TMEM245	0.012617	0.414904	1.89904
PRUNE2	0.772802	-0.160593	0.111932
SMPD3	0.801695	-0.424241	0.095991
VTI1A	0.447104	0.222544	0.349591
COG4	0.0223671	0.50626	1.65039
PRAG1	0.738079	0.327851	0.131897
DNLZ	0.25388	-0.383705	0.595371
GPATCH11	0.54302	-0.154694	0.265185
HSPB8	0.395531	0.72762	0.40282
SFRP4	0.817026	-0.884825	0.0877641
NUP93	0.724928	0.0542626	0.139705
CENPT	0.00868565	0.727438	2.0612
TSNAXIP1	0.950559	0.0870028	0.0220207
MEST	0.788611	0.483237	0.103137
CNTN1	0.397041	-0.305426	0.401164
MPI	0.0361378	-0.297406	1.44204
CTTNBP2NL	0.655809	0.129686	0.183223
SCARNA1	0.238784	2.11137	0.621994
ZNF550	0.107974	-1.09976	0.966683
ZBED5-AS1	0.0316061	0.948416	1.50023
PPP2R3C	0.000106124	0.738073	3.97419
NKAIN3	0.882853	-0.874504	0.0541114
ZNF267	0.853376	0.0607413	0.0688594
RNPC3	0.469955	-0.220688	0.327944
RACK1	0.0295469	-0.134013	1.52949
DISP3	0.871808	-0.875884	0.0595793
CDRT4	0.0743811	-0.810818	1.12854
GNB4	0.770854	0.0546219	0.113028
HHLA2	0.754019	1.86127	0.122618
SCN8A	0.143665	1.33367	0.842649
CCDC183-AS1	0.705055	-1.08022	0.151777
ADAMTS10	0.129324	2.43565	0.88832
ASB7	0.316591	0.317669	0.499502
GTF2H2C	0.891425	0.0338638	0.0499153
ANKZF1	0.624451	-0.176812	0.204502
HDAC11	0.945223	0.0377577	0.0244659
CWC22	0.534536	-0.16688	0.272023
AZI2	0.715161	0.0597497	0.145596
TGFBR2	0.479717	-0.296507	0.319015
SERF1B	0.963986	0.0076753	0.0159293
SMN2	0.20216	-0.211153	0.694305
GRB10	0.808678	0.0479828	0.0922246
ADCY10	0.515063	-1.98518	0.288139
LAMB3	0.795161	-1.2021	0.099545
ABHD11	0.0494932	0.720863	1.30545
ALG9-IT1	0.882853	-0.874504	0.0541114
ZNF436	0.366	-0.453721	0.436519
HNRNPR	0.705655	0.0321692	0.151407
MAEA	0.406818	0.130946	0.3906
COBL	0.607126	0.199665	0.216721
MGST1	0.709664	0.0608654	0.148947
STK33	0.428119	0.357896	0.368436
PTGER3	0.326733	-2.65521	0.485808
FASTK	0.0363896	0.53155	1.43902
TMUB1	0.257261	-0.217922	0.589626
PHKA2	0.438106	-0.301471	0.358421
C9orf85	0.159812	-0.396045	0.79639
TSKU	0.365262	-0.381963	0.437395
IGIP	0.402126	0.416589	0.395638
PIK3AP1	0.93928	-0.0598934	0.0272047
KIF24	0.413449	0.40711	0.383579
DPF1	0.69835	-0.173715	0.155927
ARAP1	0.319235	0.280169	0.495889
FAT4	0.555984	-0.422304	0.254938
S100A4	0.0871112	-2.76023	1.05993
PLEKHG4	0.0173128	-0.838365	1.76163
ZNF250	0.46955	0.386533	0.328318
WDSUB1	0.819885	-0.0741197	0.0862471
ZNF79	0.841074	0.150291	0.0751657
RAC2	0.614225	0.787246	0.211673
LIF	0.0636193	1.57425	1.19641
C22orf23	0.402689	-0.742513	0.395031
PLXDC2	0.22316	-0.578071	0.651383
URGCP-MRPS24	0.382674	-2.66515	0.417171
PPP1R13L	0.879068	0.0956547	0.0559773
ZNF25	0.980734	-0.0165965	0.00844887
WWTR1-IT1	0.882853	-0.874504	0.0541114
EIF3F	0.484578	-0.0692449	0.314637
GTSE1-DT	0.663047	-1.00459	0.178456
NUP62CL	0.549835	-0.191932	0.259768
SFI1	0.399514	0.306834	0.398468
PANX1	0.195398	0.68502	0.70908
UBAC2	0.529594	-0.114898	0.276057
CD2AP	0.329112	-0.202089	0.482656
ZBTB14	0.81752	0.0897172	0.0875017
ARGLU1	0.186732	-0.190249	0.728782
SPRN	0.277846	0.541616	0.556196
MYL4	0.75402	1.86126	0.122617
HYLS1	0.872385	-0.0563938	0.0592919
NBEAL2	0.738697	-0.167325	0.131534
CCDC12	0.6359	0.0929906	0.196611
HDHD2	0.745075	-0.088273	0.1278
MTRNR2L5	0.25122	3.45764	0.599946
CCDC57	0.934032	-0.0445851	0.0296383
LGSN	0.72447	2.08018	0.13998
TRIM21	0.822262	-0.153139	0.0849898
CSNK1G2	0.549989	-0.100777	0.259646
REXO4	0.178489	0.276473	0.748387
GTF3C5	0.169227	0.230684	0.771531
HOOK2	0.202943	-0.519042	0.692627
STX6	0.544883	-0.173601	0.263696
GLUL	0.00310915	-0.267781	2.50736
DHX9	0.769701	-0.0259821	0.113678
RNASEL	0.664642	0.214838	0.177412
PP7080	0.10932	-0.411637	0.961302
FLVCR1	0.718679	0.0673203	0.143465
PTPRG-AS1	0.552506	0.261815	0.257663
A1BG-AS1	0.216955	0.650113	0.66363
ZNF483	0.262493	1.91525	0.580883
CACYBP	0.894301	0.0108598	0.0485163
AQR	0.35201	-0.206347	0.453445
HOXA11-AS	0.301281	0.281584	0.521028
YWHAH	0.287194	-0.113426	0.541824
KCNN2	0.785467	-0.522139	0.104872
AJM1	0.566351	-1.32497	0.246914
SH3PXD2B	0.214601	0.441003	0.668369
SLC25A25-AS1	0.981847	-0.0136026	0.00795602
C11orf94	0.882853	-0.874504	0.0541114
BNC2-AS1	0.460092	-1.56568	0.337155
NENF	0.991035	-0.00111698	0.00391103
CHFR	0.359787	0.298391	0.443955
ST8SIA4	0.758585	0.270611	0.119996
NSL1	0.00766775	0.370177	2.11533
ITPKC	0.348768	0.505101	0.457464
RBMS2	0.399419	0.288743	0.398572
ATP5MG	1.35341e-05	0.284031	4.86857
MCF2L-AS1	0.613904	-0.393204	0.2119
FGF18	0.467727	1.20279	0.330008
RAB11B-AS1	0.779816	0.134121	0.108008
DOLK	0.656072	-0.117694	0.183049
ALOX5	0.7581	-0.532151	0.120274
SFXN2	0.510682	0.155065	0.29185
TBC1D3F	0.844953	-0.411198	0.0731676
POU1F1	0.882854	-0.874501	0.0541112
VSIG10	0.352142	0.355678	0.453282
GAN	0.224741	0.291082	0.648318
UPK2	0.975297	0.163288	0.010863
GNL2	0.406149	-0.128755	0.391315
MEI4	0.818417	-0.566914	0.0870252
CDCA8	0.33163	0.164444	0.479346
NPNT	0.0847714	-1.22858	1.07175
AGO4	0.661963	-0.169109	0.179166
DLGAP1-AS2	0.725645	2.0805	0.139276
DUSP3	0.319137	0.132466	0.496022
GALM	0.620194	0.117375	0.207472
VASH1	0.674414	-0.131278	0.171073
ING3	0.110333	-0.3406	0.957294
MPP6	0.0952336	-0.327193	1.02121
GSDME	0.217345	0.733923	0.66285
AHCY	0.00384287	-0.269349	2.41534
RIN2	0.799862	-0.197779	0.0969849
POLR3F	0.706604	-0.113434	0.150824
YLPM1	0.0111439	0.4396	1.95296
PPP1R37	0.321711	-0.602985	0.492534
DCAF4	0.664504	0.147122	0.177502
ITPRIP	0.149323	0.723479	0.825872
PPRC1	0.165651	-0.260483	0.780806
PDCD11	0.947096	0.0139708	0.0236061
CNNM2	0.152624	0.521582	0.816376
ADAM12	0.223433	2.8172	0.650852
HNRNPA1L2	0.477043	-0.132379	0.321442
LHX8	0.381204	0.624363	0.418843
SNX7	0.651831	-0.0971346	0.185865
LRRIQ3	0.502846	0.295676	0.298565
TYW3	0.0201771	0.400475	1.69514
ZDHHC9	0.093654	0.316944	1.02847
ZBED6CL	0.121762	-0.630909	0.914489
SHC4	0.28509	2.79415	0.545018
TCEAL3	0.446229	-0.457431	0.350442
PRSS37	0.621784	-2.87105	0.20636
PBX1	0.521099	-0.116047	0.283079
NDUFA4L2	0.522266	-0.989281	0.282108
MAMDC2	0.856052	0.501737	0.0674999
MROH8	0.594625	0.556012	0.225757
TPST1	0.241699	0.451161	0.616725
TOR1AIP2	0.777994	-0.0357719	0.109024
RCOR1	0.800746	0.0652625	0.0965054
PLD5	0.837538	0.26238	0.0769956
PRPH2	0.777824	-1.66008	0.109119
TSNAX-DISC1	0.455733	0.690451	0.34129
PTPRK	0.596217	-0.152941	0.224596
GSTCD	0.41084	-0.1977	0.386328
INTS12	0.761334	-0.0728525	0.118425
ZC3H3	0.0505278	0.72388	1.29647
STRN3	0.0227179	0.385459	1.64363
ZNF239	0.395567	0.363858	0.40278
ATP6V1G2-DDX39B	0.14043	0.137463	0.85254
CAGE1	0.882854	-0.874501	0.0541112
AQP12A	0.882853	-0.874504	0.0541114
PRIMPOL	0.892036	-0.0520046	0.0496178
ERAP1	0.258942	-0.603837	0.586797
SERINC5	0.507007	0.290275	0.294986
ERAP2	0.420403	0.644535	0.376334
CMYA5	0.785867	-0.522998	0.104651
RANGAP1	0.0148905	0.321398	1.82709
ZC3H7B	0.0526691	-0.371644	1.27844
GDAP1	0.125356	-0.513933	0.901854
RAB2A	0.697977	0.0547295	0.156159
GATAD1	0.307325	-0.204362	0.512403
MINDY4	0.657741	0.352458	0.181945
HS3ST3B1	0.00186022	0.712178	2.73043
SLC25A35	0.978912	0.015929	0.00925626
SKA2	0.00115457	0.352958	2.93758
PLCB1	0.0649789	0.546546	1.18723
NPIPA2	0.749316	-0.181996	0.125335
CACNA2D2	0.817588	-0.136165	0.0874656
MPV17L2	0.61545	-0.111476	0.210807
NOVA2	0.648838	0.675937	0.187864
AES	0.163205	-0.242156	0.787266
PTOV1	0.948454	-0.00788884	0.0229837
KIF1B	0.112312	0.297661	0.949573
TXNDC5	0.882853	-0.874504	0.0541114
TXNDC12-AS1	0.801013	-1.20797	0.0963607
ANKMY2	0.508455	-0.228776	0.293747
MED7	0.743782	0.091403	0.128554
ACTR3C	0.833468	-0.233144	0.0791109
RPS20	0.839165	-0.0123304	0.0761528
CMTR2	0.433136	0.325391	0.363376
OXTR	0.761247	-0.513317	0.118475
TAOK1	0.974592	-0.00527635	0.011177
CCDC163	0.181854	-0.721247	0.740278
C4orf36	0.851661	0.419679	0.0697331
IPO4	0.815222	-0.0338998	0.088724
MAP4K5	0.267842	-0.267293	0.572121
CCDC74B	0.98215	-0.010107	0.00782237
LTC4S	0.447731	-1.7921	0.348983
ATRIP	0.309166	0.308557	0.509808
PSMD5	0.336085	-1.79321	0.473551
L3MBTL1	0.184594	0.910044	0.733783
TMEM101	0.157211	-0.272163	0.803517
XK	0.297649	-0.5832	0.526296
CHAC1	6.19802e-05	-2.03215	4.20775
WWP1	0.356727	-0.220631	0.447664
SPARC	0.294341	-0.2666	0.53115
EIF3C	0.117066	-0.155687	0.93157
ZCCHC4	0.825822	0.0950167	0.0831136
TGFA	0.574366	-1.07724	0.240812
CAMK2N1	0.358075	-0.271898	0.446026
TCP11L2	0.743005	-0.6389	0.129008
TMCO4	0.93628	-0.0534639	0.0285945
SERINC2	0.00111717	1.20306	2.95188
SYNGAP1	0.416193	-0.301555	0.380706
LYN	0.273785	0.277953	0.56259
LMLN2	0.83439	-1.23725	0.078631
LRRC43	0.788179	-0.891062	0.103375
SLTM	0.860289	-0.0340397	0.0653556
CTDSPL2	0.388528	0.191226	0.410577
TOMM40	0.618303	-0.0636002	0.208799
NECTIN2	0.0674106	-0.450228	1.17127
RNF216	0.733847	0.0746931	0.134395
SPPL3	0.623603	0.0929644	0.205092
APOC1	0.000954084	-0.578946	3.02041
GAREM2	0.297694	-0.555368	0.52623
U2SURP	0.208708	-0.13076	0.680461
TTC8	0.124493	-0.488503	0.904854
MFSD12	0.496354	0.167988	0.304208
DDX55	0.0110549	-0.458704	1.95645
MED17	0.893912	0.0630878	0.048705
PLEKHM3	0.891315	0.0637731	0.0499686
PRNP	0.0865052	-0.348407	1.06296
RNASEH1	0.155108	0.323058	0.809367
RPS7	0.0597834	-0.119334	1.22342
PSKH1	0.209276	0.318061	0.67928
MRM3	0.46104	0.1558	0.336261
C3AR1	0.754019	1.86127	0.122617
PARP3	0.608873	-0.298598	0.215474
FBXW8	0.952451	0.0335093	0.0211572
RBM17	0.445533	0.0897203	0.351121
SCARNA14	0.483691	0.6974	0.315432
LRRC56	0.458459	1.44935	0.338699
ZBTB11-AS1	0.93602	-0.0337723	0.0287151
BSDC1	0.230401	-0.183678	0.637515
TMEM234	0.953396	0.0210348	0.0207267
STMP1	0.862087	-0.0198026	0.0644488
CCDC28B	0.116962	0.380073	0.931956
IQCC	0.650713	0.163644	0.186611
NEURL4	0.837577	0.463961	0.0769755
AIFM2	0.124718	0.854108	0.90407
ST8SIA6-AS1	0.849867	-0.882539	0.0706493
MRPL48	0.860157	0.0320968	0.0654222
RAB6A	0.130188	-0.287396	0.885428
CYP46A1	0.636673	2.05136	0.196083
LCN15	0.976782	-0.0377754	0.0102024
PDE4A	0.963917	0.0247778	0.0159603
ASB8	0.74272	-0.0639367	0.129175
TMSB15B-AS1	0.52292	1.27293	0.281565
RPS6KB2	0.896829	-0.0259136	0.0472902
MRAP2	0.419029	0.684144	0.377756
SF3B6	0.373673	-0.0735599	0.427509
CETN2	0.528072	0.0878099	0.277307
NINJ1	0.317266	0.296379	0.498577
BARX1	0.515771	-0.343346	0.287543
CYP26B1	0.356403	-0.708266	0.448059
OR2A1	0.83439	-1.23725	0.078631
MRPL35	0.00105842	0.513945	2.97534
CCNL2	0.762988	-0.0524689	0.117482
AMY1A	0.792528	-0.89005	0.100986
AGTRAP	0.694195	-0.0744215	0.158519
FAM200B	0.112342	-0.285563	0.949458
SRRM3	0.690806	-0.348007	0.160644
THOP1	0.972378	-0.0043836	0.012165
ZNF554	0.667361	-0.244214	0.175639
RAB33B	0.973356	-0.0106757	0.0117282
C15orf62	0.893228	-0.354059	0.0490377
PNP	0.0224828	-0.33228	1.64815
NEDD4	0.259944	-0.5391	0.58512
PDCD2	0.942389	0.00755633	0.0257697
WDR7	0.345716	0.364882	0.461281
DNAH7	0.562811	-1.20064	0.249638
SELENOI	0.960989	0.00935301	0.0172816
FAM78B	0.811006	0.391077	0.0909762
RCBTB1	0.211521	-0.318354	0.674647
PHF11	0.438242	0.509229	0.358286
MED4	0.997925	-0.000386491	0.000902145
LRCH1	0.769857	0.115467	0.11359
SUCLA2	0.343349	0.143771	0.464264
NBEA	0.586724	0.215015	0.231566
FAHD2B	0.39805	0.274708	0.400063
TC2N	0.0082503	-0.978837	2.08353
DCX	0.842072	-0.880288	0.0746509
CD82	0.168773	0.951829	0.772696
CAPN6	0.563809	2.74064	0.248868
SERTAD4-AS1	0.694097	-0.218	0.15858
PELI3	0.509743	-0.302087	0.292649
TATDN3	0.906097	0.0269924	0.0428251
HES7	0.706491	-0.617384	0.150893
MAN2A1	0.0135497	0.640517	1.86807
ANKRD10	0.784929	-0.0650028	0.10517
SREBF1	0.402865	-0.254946	0.39484
MTRNR2L12	0.132517	0.361089	0.877727
KIF11	0.135954	0.193941	0.866608
SAV1	0.321125	-0.184795	0.493326
AMN1	0.0299636	0.919009	1.52341
BICD1	0.242102	-0.616046	0.616002
IGF1R	0.0299614	0.470659	1.52344
TMEM43	0.073124	-0.382588	1.13594
MTSS1	0.0384626	1.41449	1.41496
KIAA0232	0.15295	0.428167	0.815451
OSR1	0.645519	-1.00956	0.190091
MAMLD1	0.195086	-1.37763	0.709774
ST6GALNAC5	0.73556	0.477415	0.133382
ZNF346	0.859358	0.0484604	0.0658259
UNC5A	0.851109	0.255745	0.070015
ARL13B	0.314522	-0.305573	0.502348
TIGD7	0.226437	1.18352	0.645053
PDPK1	0.870652	-0.0381809	0.0601552
TM7SF3	0.0228001	0.405593	1.64206
CRADD	0.0209861	0.810407	1.67807
DEF8	0.00169264	0.422659	2.77143
MDK	4.32907e-07	-0.594669	6.36361
AMBRA1	0.381091	-0.270295	0.418971
CLEC4A	0.618665	2.0445	0.208545
CMAS	0.83517	0.0281092	0.0782253
HCFC2	0.183624	0.503619	0.736071
PRKAB1	0.348733	0.252918	0.457506
XYLT1	0.219938	-1.28565	0.6577
PSMD6-AS2	0.444779	-1.97633	0.351856
HS3ST6	0.864798	0.682688	0.0630855
RERE	0.687752	0.0992768	0.162568
LHPP	0.558149	-0.187389	0.25325
TAX1BP1	0.0759756	0.209187	1.11933
ADAMTSL3	0.367383	2.17445	0.434881
DPYSL2	0.656788	0.109054	0.182575
STEAP1B	0.366341	-0.808814	0.436115
MPRIP-AS1	0.763196	-0.455998	0.117364
ITGA1	0.878209	0.0889089	0.0564022
FOXO1	0.000943564	0.872049	3.02523
RAB6C-AS1	0.669725	0.478856	0.174104
FBXL5	0.125443	0.356695	0.901554
ARHGEF17	0.847674	-0.251904	0.071771
KRTAP19-1	0.210091	-1.04063	0.677593
GABRE	0.725645	2.0805	0.139276
GUCD1	0.226392	0.20506	0.64514
KATNBL1	0.859219	-0.0463062	0.0658963
EMC7	0.370081	0.122768	0.431703
SMG9	0.137501	-0.438901	0.861693
UBE2D2	0.409773	-0.0947881	0.387457
SLC30A9	0.667798	0.0581348	0.175355
DIAPH1	0.422605	0.172219	0.374065
IER5	0.0150624	0.382508	1.82211
COPS2	0.000881851	-0.511099	3.0546
GABRB3	0.370416	-0.289141	0.43131
ANKHD1	0.00931453	0.973641	2.03084
OLAH	0.727705	-1.11661	0.138045
RPP38	0.745148	0.0731506	0.127757
NMT2	0.920992	-0.0219567	0.0357441
ANKRD20A1	0.825778	0.473921	0.0831365
TMEM45A	0.0347839	-0.719049	1.45862
ZNF678	0.127205	-0.365372	0.895497
RYK	0.530667	-0.136786	0.275178
TOPBP1	0.263476	0.191411	0.579259
SNRK	0.862932	0.0589592	0.0640236
LDOC1	0.401821	-0.164323	0.395968
EXT1	0.218517	-0.305824	0.660515
MAPK12	0.572925	-0.14109	0.241902
SHMT2	2.69412e-05	-0.48504	4.56958
RNFT2	0.0934076	0.500915	1.02962
QRFPR	0.635128	-0.505462	0.197138
POFUT2	0.507023	-0.190631	0.294972
FAM157C	0.517156	1.87855	0.286378
PDZD7	0.507567	0.481898	0.294506
MAPT	0.568969	-0.192202	0.244911
YAF2	0.921487	-0.0251487	0.0355108
SLAIN1	0.508364	0.106336	0.293825
ISPD	0.370013	0.61417	0.431783
DIAPH3	0.454884	-0.151547	0.3421
NPIPA7	0.827586	0.119068	0.0821871
MSL3	0.395313	0.223254	0.403059
CLNS1A	0.0031227	-0.297854	2.50547
TRIB3	0.000607402	-0.941949	3.21652
PTPA	0.0786239	-0.356841	1.10445
TRAPPC8	0.000224034	0.641237	3.64969
CMC1	0.77579	-0.0431534	0.110256
CCDC43	0.871666	-0.023714	0.0596497
AKAP9	0.69757	0.0864744	0.156412
GPM6A	0.92636	-0.0329809	0.0332204
HECA	0.401894	0.207958	0.395889
FAM237B	0.87415	-0.459814	0.0584139
IFRD1	1.04933e-06	-0.840683	5.97909
CBX6	0.917635	-0.0129286	0.0373301
TRMT44	0.947464	0.0286964	0.0234375
ISL2	0.132871	-0.439712	0.876569
PKD2L1	0.882853	-0.874504	0.0541114
MOCS2	0.31573	0.159185	0.500684
ITGA2	0.160769	-0.794854	0.793799
AKR1C4	0.83439	-1.23725	0.078631
COPS8	0.0388121	0.254318	1.41103
BARD1	0.00391954	0.605543	2.40676
DHRS7	0.624865	-0.0780531	0.204214
OR13G1	0.725645	2.0805	0.139276
PPM1A	0.635946	0.102251	0.19658
MSX2	0.00238069	0.76258	2.6233
SAP30BP	0.335346	0.184119	0.474507
VPS11	0.304247	0.288859	0.516774
WDR92	0.0496528	0.581314	1.30406
ZNF487	0.305818	-0.735291	0.514537
ACOXL-AS1	0.725645	2.0805	0.139276
DDR1	0.317807	-0.445273	0.497836
FLJ45513	0.423736	-1.97295	0.372905
RPP25	0.0428454	-0.433213	1.3681
GRINA	0.0460843	-0.28654	1.33645
ARIH2	0.732979	0.0456342	0.134909
PLPPR3	0.349588	1.38214	0.456443
WRNIP1	0.571525	0.0928546	0.242964
MRS2	0.199344	-0.223649	0.700397
DNAJC19	0.460199	-0.113894	0.337055
PARP2	0.211817	0.24215	0.67404
GSTP1	0.720161	0.0250886	0.14257
SMIM11A	0.127605	-0.360035	0.894132
FDX2	0.813512	0.0522562	0.089636
EXOC3L1	0.387153	-2.17704	0.412117
RNA5S14	0.891408	-0.356225	0.0499234
POU2F2	0.14352	-2.49906	0.843087
SLC34A3	0.641689	2.73302	0.192675
CLHC1	0.425063	0.530638	0.371547
NEUROD1	0.167319	2.51341	0.776454
DLG5	0.856858	-0.0386493	0.0670909
DUSP19	0.669716	-0.196069	0.17411
FRZB	0.798705	-1.2057	0.0976136
NCK1	0.176196	-0.325845	0.754004
ITGAL	0.75402	1.86126	0.122617
TMED6	0.278378	2.06198	0.555365
FMOD	0.882853	-0.874504	0.0541114
ZBED9	0.971037	0.0184916	0.0127641
TRMT1L	0.132027	0.316485	0.879339
IFI6	0.817208	0.054657	0.0876673
AHDC1	0.897328	-0.0580577	0.0470489
CASC19	0.872301	0.436239	0.0593338
LPP	0.918892	0.0268056	0.0367353
PCOLCE	0.651218	-0.247264	0.186274
DAXX	0.690321	0.0694067	0.160949
RIMBP3C	0.134674	2.57996	0.870717
STK17B	0.305494	0.271648	0.514997
CDC123	0.211871	-0.132176	0.673928
PHC3	0.000904874	1.09384	3.04341
AUTS2	0.0742774	0.248067	1.12914
PIAS1	0.842165	0.0380221	0.074603
RALBP1	0.0445458	0.409088	1.35119
MIS18A	0.804135	0.0290315	0.094671
PYCR3	0.361784	-0.277468	0.441551
TSTA3	0.67279	0.10914	0.17212
NUDT10	0.351658	0.280577	0.45388
ZNF300	0.173961	0.727252	0.759548
TNIP1	0.757432	0.0741084	0.120656
G3BP1	0.325228	0.100814	0.487812
SUMF2	0.284763	-0.155745	0.545516
ZNF628	0.773115	0.14549	0.111756
MMP2	0.33966	0.566302	0.468955
EEF1D	0.130462	-0.127698	0.884517
STRADB	0.14972	-0.336995	0.824719
PDZK1	0.356947	-2.14817	0.447396
YTHDC1	0.151846	0.238672	0.818598
A4GALT	0.179233	-1.75448	0.746582
ATF4	4.34517e-14	-0.524003	13.362
SLCO3A1	0.070472	3.53096	1.15198
LANCL2	0.8989	-0.0341623	0.0462888
DDC	0.223188	2.53098	0.651329
FIGNL1	0.305842	0.216214	0.514503
SEC61G	0.109392	-0.121842	0.961014
PACERR	0.831225	-0.882154	0.0802815
CBFA2T2	0.0455802	0.676727	1.34122
NUCKS1	0.683217	-0.0260811	0.165441
ABHD1	0.46229	-0.648491	0.335085
MEIS1	0.55621	-0.194343	0.254761
MAP2K4	0.946008	0.0140681	0.0241054
EIF3H	0.322475	0.0766488	0.491504
UTP23	0.0709191	0.399609	1.14924
SLC38A3	0.345533	-0.768683	0.461511
OLMALINC	0.427319	-0.227528	0.369247
MSANTD4	0.930984	-0.0226716	0.0310576
TNPO2	0.873382	0.029415	0.0587957
ZNF721	0.24063	0.276259	0.61865
CCNI	0.247653	-0.13656	0.606157
TOMM7	0.689647	-0.0253563	0.161373
EFR3A	0.314663	-0.281336	0.502154
ENOPH1	0.202267	-0.200849	0.694076
LIN52	0.536735	0.144859	0.27024
E2F5	0.184243	0.257355	0.734609
ABCB8	0.432067	0.186484	0.364448
C2orf42	0.0748029	0.852238	1.12608
TRAK2	0.655455	0.1502	0.183457
MAPK4	0.760176	-0.356864	0.119086
ATF5	0.974594	-0.0140919	0.0111763
MRPL57	0.17892	0.156958	0.747342
EIF4B	0.0044608	-0.266484	2.35059
NRXN3	0.703559	-0.127258	0.152699
PPP1CB	0.47262	-0.076961	0.325488
ADAT3	0.732968	-1.99937	0.134915
ABCD1	0.674602	-0.357826	0.170953
SLC25A38	0.466532	0.171002	0.331119
ESS2	0.742867	0.0712578	0.129089
CSRNP1	0.309487	0.567745	0.509358
GRID2	0.258155	-2.26964	0.588119
TRIM59	0.435411	0.167297	0.3611
IQCH-AS1	0.758846	0.310286	0.119846
CRLS1	0.617106	0.073123	0.20964
ZNF394	0.279269	-0.456765	0.553977
UBAP2L	0.289643	0.121335	0.538137
PARD6A	0.491889	0.469733	0.308133
ZNF821	0.307612	0.485967	0.511997
STRAP	0.129278	0.128999	0.888474
SLCO1C1	0.793498	-0.889828	0.100454
AEBP2	0.978112	0.00559991	0.00961138
DDX19A	0.49535	-0.116334	0.305088
SLC9A6	0.729133	-0.101625	0.137193
PRDX1	2.51323e-06	0.334642	5.59977
DDX58	0.0795884	-2.7936	1.09915
DDX19B	0.331936	0.24756	0.478946
CMTM7	0.752397	-0.0742487	0.123553
FBXL2	0.151239	-0.568471	0.820338
EEF1AKMT3	0.0265135	-1.23261	1.57653
TTC34	0.827162	0.329012	0.0824096
SYTL4	0.61851	-0.27032	0.208654
ATAD3C	0.240858	1.75743	0.61824
CTSK	0.309336	-1.4727	0.509569
MCL1	0.700966	0.0455595	0.154303
ADAMTSL4	0.4929	-1.98273	0.307242
EHD2	0.501403	0.590522	0.299813
RNGTT	0.449517	0.200125	0.347254
HOTAIR	0.0396139	-1.01966	1.40215
ROCR	0.776298	-1.18158	0.109971
C2-AS1	0.882853	-0.874504	0.0541114
ATG101	0.620641	-0.162042	0.20716
CLIC4	0.637454	-0.0642925	0.195551
CCPG1	0.904918	-0.0340606	0.0433908
SLC16A4	0.152475	1.08692	0.816802
CRYM-AS1	0.346877	-1.87227	0.459825
SLC9A3R2	0.211827	-0.310874	0.674018
LDLRAD4	0.905584	0.0936412	0.0430711
KCTD19	0.638545	0.466798	0.194809
ZNF573	0.951506	-0.0273945	0.0215885
CLDN4	0.630572	-1.0801	0.200266
UGT3A2	0.747637	-0.243222	0.126309
FAM84B	4.75203e-05	-0.7548	4.32312
HOXC-AS1	0.107264	-1.04765	0.969546
CCL5	0.725645	2.0805	0.139276
PHF3	0.535811	-0.137533	0.270988
CEP70	0.261716	-0.348505	0.58217
ICA1L	0.179981	0.534308	0.744774
PPM1L	0.827229	-0.082612	0.0823745
NCAPH2	0.716085	0.0719325	0.145036
TOMM34	0.952289	-0.0102792	0.0212312
BMP3	0.490201	1.5271	0.309626
PRDM8	0.549008	-0.58223	0.260421
GRIK4	0.353904	1.41051	0.451115
MITF	0.441418	-0.284273	0.35515
ENTPD5	0.239703	-0.417201	0.620326
PLCD1	0.680476	0.472593	0.167187
AASS	0.545843	0.348501	0.262933
APOBEC3C	0.987371	-0.00282456	0.00551948
LYPLA2	0.147028	0.340826	0.832599
ELOA	0.387992	0.158261	0.411177
HIST2H2BE	0.0326975	-1.3047	1.48549
RALYL	0.75402	1.86126	0.122617
ZBTB40	0.165658	0.424851	0.780787
AMER1	0.957163	0.0237031	0.0190141
ORC5	0.605528	-0.12085	0.217866
DNAAF5	0.892672	-0.022559	0.0493083
SLC25A45	0.759095	-0.250691	0.119704
RPL29	0.0280472	-0.16867	1.55211
HSPA8	0.529332	0.0915141	0.276272
CENPJ	0.107866	-0.549661	0.967117
PARD3-AS1	0.318778	2.15704	0.496511
PPP1R9A	0.996042	0.00419156	0.00172248
COG6	0.442606	-0.186491	0.353983
PLEKHB2	0.400298	0.134201	0.397616
BIRC6	0.351497	-0.184342	0.454079
NOL10	0.31318	-0.192415	0.504206
TSR2	0.0041061	0.532856	2.38657
CPA5	0.75402	1.86126	0.122617
PRDM13	0.180268	-0.642262	0.744082
CTBP1	0.177454	-0.155086	0.750913
KHDRBS2	0.725645	2.0805	0.139276
FBXL4	0.93786	0.0214422	0.0278621
CCNC	0.0117822	-0.351124	1.92877
TPTEP2-CSNK1E	0.23708	0.170586	0.625105
FBP1	0.613192	1.26258	0.212404
MORF4L1	0.0639266	0.146635	1.19432
TNIK	0.616631	-0.132906	0.209975
ZMYND8	0.131346	-0.376858	0.881582
FAM114A2	0.686189	0.102335	0.163556
FAM167A	0.220315	-2.12714	0.656955
SGK2	0.875565	-0.875396	0.0577118
PCMT1	0.176993	-0.133612	0.752045
DAB1	0.967087	0.0605681	0.0145346
CCDC170	0.390522	0.87637	0.408355
GRAMD2A	0.83439	-1.23725	0.078631
RHOT1	0.0895711	-0.414738	1.04783
ZNF74	0.674929	-0.102255	0.170742
PPIL6	0.205323	-1.31461	0.687563
CHRD	0.355278	1.04956	0.449432
P3H2	0.761423	0.435649	0.118374
PURPL	0.0238374	-1.71901	1.62274
PPP1R14D	0.532272	1.87682	0.273866
LSM14A	0.15334	-0.188893	0.814344
CPLANE1	0.854079	0.0761374	0.0685019
FAR1	0.960954	0.00744238	0.0172975
HMBS	0.245141	0.19926	0.610583
KMT5A	0.923907	0.017692	0.034372
OTUD6B-AS1	0.113848	0.348891	0.943674
DLX6	0.0934737	-0.965682	1.02931
PCDHGA6	0.869716	0.39176	0.0606224
NOL8	0.509494	-0.133542	0.292861
IRAK4	0.713068	0.139339	0.146869
CCDC151	0.9121	0.128613	0.0399578
KCNG3	0.300755	-0.725625	0.521787
TIMM10	0.30458	0.135225	0.516298
CHPF	0.0450974	-0.5237	1.34585
ACSL3	0.819387	-0.0288278	0.0865112
BAG6	0.0759672	0.200193	1.11937
MRPS23	0.52862	0.08179	0.276856
LUC7L	0.56668	0.105252	0.246662
PRRC2A	0.96963	-0.00723242	0.0133937
HSD11B1L	0.279872	-0.535844	0.553041
TERT	0.193842	-2.13884	0.712553
CHML	0.381879	-0.180212	0.418074
AMBN	0.958555	-0.0541289	0.0183831
RPL39L	0.576171	-0.0991521	0.239449
IKZF5	0.20039	-0.258499	0.698124
SYNPO2	0.878307	0.377763	0.0563537
RNF223	0.882853	-0.874504	0.0541114
XIAP-AS1	0.877678	-0.875141	0.0566647
ASXL3	0.168402	0.727082	0.773654
SLC25A52	0.301643	1.99822	0.520506
ACTL6A	0.582744	0.103451	0.234522
SYNGAP1-AS1	0.19559	2.91869	0.708653
AFG3L2	0.178764	-0.252965	0.747721
PPIE	0.692771	0.0777705	0.15941
SMAP2	0.301944	0.242276	0.520073
SS18	0.11624	-0.246612	0.934643
WHRN	0.504429	0.378264	0.2972
ZNF529-AS1	0.922394	-0.124707	0.0350834
ZNF219	0.338352	0.423177	0.470632
CASP7	0.333969	-0.227906	0.476294
ARHGEF40	0.203958	-0.722557	0.69046
NSMF	0.732243	-0.0963719	0.135345
CEBPD	0.156436	-0.841561	0.805662
KDM4B	0.114382	0.417673	0.941643
TICAM1	0.429998	-0.719819	0.366534
CCDC32	0.248758	0.397048	0.604223
ATP2B1	0.822915	0.0372823	0.0846448
UHRF1	0.0157734	-0.355307	1.80207
ORAI1	0.671729	-0.148041	0.172806
HOOK3	0.614875	0.0888029	0.211213
DHRS11	0.700767	-0.125148	0.154426
LHX1	0.941165	0.0499671	0.0263344
DGLUCY	0.803905	-0.124408	0.0947951
RPH3A	0.83439	-1.23725	0.078631
ARHGAP11A	0.228537	0.24978	0.641044
CHAMP1	0.607024	-0.110332	0.216794
INPP5F	0.942822	-0.0261419	0.0255703
GRM3	0.334537	-1.95241	0.475556
CHPF2	0.4029	0.194786	0.394802
APPL1	0.855981	-0.0309115	0.0675359
MUM1L1	0.447261	0.65906	0.349439
BACE1-AS	0.409787	-0.386004	0.387441
PRR29	0.901833	0.729596	0.0448738
C4B	0.767297	-1.17088	0.115036
RBPMS-AS1	0.808064	-0.886643	0.0925542
HOXD8	0.232487	0.46327	0.633601
CREG2	0.807969	-0.886661	0.0926053
SYF2	0.281438	-0.184548	0.550617
RSRP1	0.797047	0.057389	0.098516
OSBP	0.5659	-0.110982	0.24726
UBB	0.393209	0.0490974	0.405376
CDK1	0.0414479	0.202796	1.3825
STX8	0.761405	0.0781491	0.118385
DTX4	0.882853	-0.874505	0.0541114
ATG2A	0.0353702	0.739525	1.45136
EHD1	0.759875	0.0752342	0.119258
ZNF488	0.973071	-0.0234645	0.0118554
OGDHL	0.373877	-0.358887	0.427272
CCNT1	0.820514	0.0442561	0.085914
PUS7L	0.435917	0.183771	0.360596
ATG3	0.241036	-0.167765	0.617918
LBR	0.179126	-0.136094	0.74684
RABL3	0.879337	0.0399021	0.0558449
ADPRH	0.385613	-1.96563	0.413848
EPHX1	0.3762	0.209617	0.424581
ZNF638	0.507095	0.136825	0.29491
TARBP2	0.133271	0.330591	0.875265
WNT8B	0.950404	0.366853	0.022092
FAM186B	0.462047	-2.22249	0.335314
RDH5	0.854067	-0.473152	0.0685082
PGM1	0.531829	0.0824995	0.274228
HUNK	0.277275	0.464938	0.557089
AGAP2	0.782343	0.246882	0.106603
GABRA4	0.808443	-1.21511	0.0923506
MTF1	0.863255	-0.0611146	0.0638608
ZNF548	0.0362216	1.48774	1.44103
PPIAL4A	0.754008	-0.950123	0.122624
APOA1	0.158585	-1.76543	0.799738
GCH1	0.335326	0.274993	0.474532
UTRN	0.0896476	-0.504591	1.04746
ARAF	0.710567	-0.0809241	0.148395
PTPRJ	0.208027	0.54524	0.68188
C11orf49	0.611675	0.130349	0.213479
LARP1B	0.897159	0.0281701	0.0471305
KLK8	0.699624	-0.505903	0.155135
ITGB3BP	0.443451	-0.0962621	0.353154
KPNA4	0.197123	0.211861	0.705262
ASIC2	0.882854	-0.874501	0.0541112
MCM3AP-AS1	0.372648	-0.673873	0.428701
PALM2-AKAP2	0.861009	-0.0548794	0.0649923
ZNF407	0.608264	-0.298233	0.215908
ZNF142	0.826174	0.086147	0.0829282
RSPH9	0.86718	0.503585	0.0618906
TTC36	0.856577	0.66894	0.0672335
PPARD	0.715823	-0.135013	0.145194
MTRF1L	0.28787	0.282992	0.540804
COPS9	0.041757	0.17591	1.37927
MIA2	0.196754	-0.418789	0.706076
RAPGEFL1	0.20637	1.0707	0.685354
PDK3	0.148682	0.514039	0.827742
C2orf16	0.848619	0.205917	0.0712872
NR2F1	0.00134908	0.452483	2.86996
TCEANC2	0.391757	-0.180188	0.406983
CHRAC1	0.757284	0.054415	0.120741
ZNF221	0.864855	-0.358972	0.0630565
TMEM59	0.281068	0.138599	0.551188
TMBIM6	0.124696	-0.0994048	0.904146
NF1	0.793222	0.0512565	0.100605
ALKAL1	0.000366161	-0.977785	3.43633
TBX3	0.890395	-0.031308	0.0504175
VKORC1L1	0.185095	-0.218288	0.732605
ANXA6	0.9449	0.011681	0.024614
GMFB	0.0411328	0.330645	1.38581
ZNF441	0.502143	-0.837296	0.299173
NATD1	0.20699	0.468974	0.68405
TMEM87A	0.378627	0.221003	0.421789
DYNC1I2	0.0138906	0.402564	1.85728
NIPSNAP3B	0.667627	-0.898514	0.175466
SYCE1L	0.244447	-0.721333	0.611815
ABCA1	0.827626	-0.207333	0.0821657
HIST2H2AA3	0.725501	0.109485	0.139362
HIST2H3C	0.34871	-0.764311	0.457535
HIST2H2BF	0.712343	0.481732	0.147311
MRPL14	0.819949	0.0264799	0.0862133
GPR137C	0.650041	0.227415	0.187059
HBEGF	0.473536	-0.509922	0.324647
LYSMD2	0.119402	-0.994927	0.92299
FGF7	0.252357	-2.8556	0.597985
SLC27A2	0.599563	-0.220162	0.222165
FBXW11	0.623764	-0.0808188	0.20498
SPAG5	0.0300276	0.4028	1.52248
SPINK8	0.882854	-0.874501	0.0541112
MAP3K20-AS1	0.778562	-0.8934	0.108707
HAUS7	0.601403	0.157861	0.220834
ARHGAP19	0.0494044	0.422375	1.30623
LCAT	0.479071	0.68258	0.3196
IL1R1	0.0886894	2.09867	1.05213
COL21A1	0.480726	1.98327	0.318102
EIF2D	0.477649	-0.113663	0.320891
KLHL31	0.534432	1.33687	0.272107
NLN	0.973856	-0.00684585	0.0115053
CENPK	0.726299	-0.0665078	0.138884
POLH-AS1	0.73378	0.365368	0.134434
ATP2C1	0.538728	0.114967	0.26863
DUS1L	0.591701	0.0631992	0.227898
CNBP	0.0519305	-0.211484	1.28458
ZNF829	0.505176	0.423118	0.296558
FASN	0.502906	0.0709485	0.298514
GPR173	0.83439	-1.23725	0.0786309
HES1	0.1846	0.178739	0.733769
GAS6	0.469322	0.335222	0.328529
CCDC82	0.320164	-0.280581	0.494627
DDX53	0.83439	-1.23725	0.078631
FAM110C	0.330663	-3.13512	0.480615
SRRM2	0.192351	-0.128935	0.715905
ABCA3	0.561456	0.164428	0.250685
EIF4E3	0.461747	-0.189406	0.335596
KCTD5	0.768823	-0.0580633	0.114174
CLSPN	0.0897047	0.721464	1.04718
TEKT2	0.219965	-2.15945	0.657646
BBS10	0.842309	0.051887	0.0745287
FIZ1	0.125033	-0.983227	0.902975
CNOT4	0.885251	0.0350386	0.0529337
FAHD2A	0.398551	-0.238619	0.399516
KCNIP3	0.649553	0.38139	0.187385
NKX2-2	0.588133	0.395438	0.230525
RBCK1	0.0430781	-0.477319	1.36574
TMX4	0.280687	-0.204107	0.551778
SARNP	0.872724	-0.074494	0.0591231
HSP90B1	7.00855e-43	-1.07228	42.1544
CFAP52	0.864766	0.503205	0.0631016
FAM96B	0.029185	0.23839	1.53484
MAPK9	0.831436	-0.0335958	0.0801709
COG7	0.667076	-0.12609	0.175825
CDK11A	0.732473	1.86218	0.135208
CDC27	0.776443	-0.0400773	0.10989
FAM126B	0.73423	-0.0925223	0.134168
GJD2	0.552865	1.40023	0.257381
ZNF732	0.617685	2.04413	0.209233
RNF150	0.11195	-0.567404	0.950975
HCG25	0.430522	-1.55474	0.366004
HIVEP1	0.234899	0.517945	0.629118
USP49	0.472548	-0.333879	0.325554
TOP1	0.0592652	0.220578	1.2272
TMEM11	0.308075	-0.193858	0.511343
KRT17	0.275182	-1.59223	0.56038
MAP3K3	0.00623018	0.650191	2.2055
BHLHB9	0.0403499	0.612209	1.39416
TAF12	0.0100508	0.460499	1.9978
MGAT4B	0.310488	0.183541	0.507955
ENOX1	0.24091	-0.49312	0.618146
MRNIP	0.808734	0.0716129	0.0921941
RPL8	0.00667458	-0.159778	2.17558
JMJD7-PLA2G4B	0.616258	-0.279919	0.210238
DOK4	0.375534	0.511368	0.425351
GABARAPL2	0.828407	0.0212659	0.0817563
ATF7IP	0.371608	0.267865	0.429915
PLEKHG5	0.0988956	-1.74131	1.00482
NPIPB5	0.278341	-0.37334	0.555422
IQGAP3	0.48082	-0.238475	0.318017
NPAS2	0.823351	-0.12662	0.0844149
KIRREL1	0.702882	-0.145503	0.153117
TMEM116	0.864069	-0.0675438	0.0634517
UCKL1	0.0825611	-0.451087	1.08322
DDX27	0.621739	-0.0885365	0.206392
RNF114	0.268754	0.171586	0.570645
PMEPA1	0.521691	-0.270456	0.282586
STX16	0.524468	-0.103154	0.280281
GGN	0.756572	-0.899252	0.12115
TRAF5	0.509438	-0.23746	0.292909
FUCA1	0.604257	-0.113084	0.218779
GEMIN5	0.0628929	-0.394982	1.2014
LEMD2	0.466858	-0.190798	0.330815
MRPL22	0.124551	0.206662	0.904652
SOS1-IT1	0.680514	-0.43739	0.167163
ZBED1	0.0153941	0.705794	1.81265
LRP4-AS1	0.911778	0.102223	0.0401107
MVD	0.802553	-0.0773311	0.0955262
TMEM189	0.753039	0.0566154	0.123183
ARAP2	0.358138	-0.752354	0.445949
FAM13B	0.610608	-0.1423	0.214237
ZNF280B	0.0910022	0.511456	1.04095
ANKRD18B	0.0781844	-0.665711	1.10688
ASCC1	0.832338	0.048676	0.0797003
PDS5B	0.281333	0.256599	0.55078
ZNF92	0.1503	-0.350358	0.823041
EID1	0.341552	0.0999108	0.466543
FAM13A-AS1	0.621032	0.570453	0.206886
KANSL1L	0.824111	0.126313	0.0840141
PLPP3	0.18216	0.436188	0.739546
TBC1D8B	0.470299	-0.426861	0.327626
VPS4A	0.0274533	0.327453	1.56141
WDR44	0.0642884	0.457761	1.19187
FXYD6	0.653339	-0.139204	0.184861
MAGEA2	0.397327	0.343352	0.400852
BRIP1	0.369442	0.231768	0.432453
RHOXF2	0.82134	-1.22664	0.0854773
RIF1	0.552485	-0.106885	0.257679
ATP8A2	0.149298	2.04945	0.825947
MIS18BP1	0.615821	0.135134	0.210546
NRL	0.445323	-0.969069	0.351325
LYRM9	0.187064	-0.700644	0.72801
PTPMT1	0.44878	-0.117431	0.347967
HS6ST1	0.0493799	-0.514907	1.30645
SLC29A2	0.892886	-0.0449215	0.049204
GJC3	0.829905	0.611482	0.0809715
WWOX	0.448197	-0.251068	0.348531
TOM1L1	0.416816	-0.155458	0.380055
ARHGEF16	0.526651	0.468708	0.278477
SESN2	0.224649	-0.171589	0.648495
PRH1	0.524274	-0.920064	0.280441
TRAF3IP2-AS1	0.0671751	-0.971064	1.17279
ZMIZ2	0.121816	0.387553	0.914295
SMPDL3B	0.193406	0.418912	0.713531
MARC2	0.10815	-0.561993	0.965972
PMS2	0.347963	0.500452	0.458467
CTTN	0.33338	0.111626	0.477061
DHX29	0.705432	0.0780784	0.151545
TRAM1L1	0.0127257	1.61793	1.89532
TBC1D15	0.371635	-0.170843	0.429883
ATP2B3	0.921615	-0.320371	0.0354502
GJA3	0.907197	0.0685965	0.0422985
FTSJ1	0.847087	-0.0371788	0.0720721
TBC1D3K	0.232617	1.77774	0.633359
BOP1	0.206737	0.200873	0.684581
STYK1	0.0555136	3.80838	1.2556
PLTP	0.0505015	-0.616022	1.2967
EPDR1	0.336545	-0.429002	0.472957
F2R	0.433642	-0.203871	0.362869
TTC21A	0.840648	-0.416259	0.0753856
CXCL17	0.764192	-1.16706	0.116797
RCN1	0.000947073	-0.454891	3.02362
ACTB	0.000678186	0.209341	3.16865
XRN2	0.172357	-0.168103	0.763571
BTBD11	0.295182	-0.541283	0.52991
MAN1B1-DT	0.782312	-0.261483	0.10662
ZDHHC6	0.965501	0.00844447	0.0152471
C6orf48	3.06462e-08	-0.781392	7.51362
CD22	0.882853	-0.874504	0.0541114
FLOT2	0.333704	0.166982	0.476638
SDF2	0.467388	0.166214	0.330323
BAIAP2-DT	0.527987	-0.303069	0.277377
IFT43	0.260463	-0.248786	0.584254
HOXC4	0.00631703	-0.627834	2.19949
ADM	0.655723	0.196303	0.183279
BTBD10	0.554876	-0.164549	0.255804
C17orf97	0.0159081	1.72869	1.79838
ZKSCAN4	0.824235	0.117405	0.083949
ACAP3	0.791633	-0.123133	0.101476
OGT	0.00461289	-0.424532	2.33603
ITGB1BP2	0.579992	-2.26051	0.236578
ARPC5	0.0133429	0.282238	1.87475
STX11	0.488634	0.672751	0.311017
PLXNA1	0.427312	-0.20161	0.369255
DDX21	0.000123666	-0.311156	3.90775
BMS1	0.428005	0.126183	0.368551
STOX1	0.717829	-0.186322	0.143979
RET	0.556214	-0.495556	0.254758
PPP1R7	0.00066085	0.445858	3.1799
PASK	0.482516	-0.238264	0.316488
CTNND2	0.882854	-0.874501	0.0541112
P2RY1	0.106591	-0.513614	0.972281
CPLANE2	0.761193	-0.255882	0.118505
STRN4	0.841065	-0.0392207	0.0751705
MT1X	0.00815406	-0.732627	2.08863
FECH	0.492513	-0.154532	0.307582
CASC1	0.791822	0.589312	0.101372
ABRACL	0.0101251	0.295641	1.9946
LRMP	0.823292	-0.88362	0.0844463
TPRA1	0.216085	-0.349043	0.665376
KLLN	0.288983	-1.21896	0.539128
SMIM29	0.597377	0.15013	0.223751
NF2	0.710155	0.0595701	0.148647
UBTD2	0.572751	-0.105863	0.242034
TBC1D22A-AS1	0.817703	0.555509	0.0874043
CREBRF	0.369086	0.307934	0.432872
DCBLD1	0.548763	-0.220494	0.260615
VTI1B	0.129096	0.236397	0.889089
SFXN1	0.03372	0.221315	1.47211
PSMA3	0.250776	0.108812	0.600714
PIGH	0.683105	-0.0817817	0.165512
AFAP1	0.225249	0.466511	0.647337
COA4	0.657991	0.0499189	0.18178
DICER1	0.133226	0.234681	0.875411
STX17-AS1	0.529907	0.788395	0.275801
TSR3	0.12856	0.222115	0.890894
CAPN12	0.805619	-0.887157	0.0938705
EXOC7	0.6742	0.0695473	0.171211
VPS35	0.535147	0.0622502	0.271527
RNF144A-AS1	0.469931	-1.77907	0.327966
ATRNL1	0.17532	-0.651448	0.75617
BMP4	0.460419	0.261055	0.336847
ATP5S	0.185367	-0.252935	0.731967
KCNQ1	0.209016	-2.1201	0.679821
MTMR12	0.964761	0.0126243	0.0155804
SIDT1-AS1	0.754019	1.86127	0.122617
BAHD1	0.526244	0.170371	0.278813
PCSK7	0.807255	0.0654307	0.092989
DISP2	0.718813	0.260004	0.143384
CDAN1	0.399852	0.415954	0.3981
ZNF316	0.682051	0.145134	0.166183
HSF1	0.670005	-0.0679167	0.173922
C6orf120	0.285535	0.219274	0.544341
COL4A3	0.302975	-2.48856	0.518594
MAP2K1	0.971154	0.00585012	0.0127119
SFTA3	0.170573	1.07538	0.768089
TINF2	0.118772	0.457321	0.925286
SOGA3	0.328478	-2.10962	0.483494
PLOD3	0.269327	-0.302503	0.56972
C1GALT1	0.482511	-0.213223	0.316493
ZNF629	0.258952	-0.298497	0.58678
MAPK13	0.216055	-2.09765	0.665436
MAP3K21	0.593366	0.115113	0.226677
RPA3	0.00054963	0.310376	3.25993
CORO1A	0.900648	-0.106607	0.0454447
VTA1	0.541817	0.0880942	0.266147
FBXO34	0.657929	-0.146385	0.181821
CTC1	0.673888	0.228829	0.171413
INSM2	0.737648	-1.13137	0.132151
RAB8B	0.685645	0.132831	0.1639
GPT2	0.00986255	-0.580556	2.00601
RNA5S6	0.858772	0.372125	0.0661222
DLGAP5	0.844188	0.0331433	0.0735609
TEX41	0.862161	0.502783	0.0644117
TNRC6C-AS1	0.520768	1.34966	0.283356
BABAM2	0.110932	0.382759	0.954943
SLC30A2	0.83439	-1.23725	0.078631
UBR2	0.641435	0.11462	0.192847
DMAC1	0.0479078	-0.319473	1.31959
CHKB-CPT1B	0.735142	0.113884	0.133629
LDLRAP1	0.422841	0.236965	0.373823
TDRD12	0.401097	-1.50591	0.39675
JUP	0.940197	-0.0163365	0.0267811
HAP1	0.763	0.238056	0.117475
CRYL1	0.578366	-0.278935	0.237797
GJB2	0.668189	0.475861	0.175101
REEP3	0.998138	-0.000459022	0.000809378
MYH9	0.527764	0.0791063	0.27756
ZNF549	0.947908	-0.0425515	0.0232338
PEX19	0.0105788	0.395035	1.97556
RASA4B	0.249403	-1.32051	0.603097
ANLN	0.493049	0.172698	0.30711
PLAUR	0.14957	0.569564	0.825154
DCTD	0.148721	-0.245314	0.827627
RAD21-AS1	0.752742	-0.404144	0.123354
AZIN1-AS1	0.659326	-0.433168	0.1809
PSENEN	0.0520816	0.340386	1.28332
LMOD1	0.364542	0.750521	0.438253
IFT22	0.904246	0.0284261	0.0437134
MKLN1	0.196055	-0.258159	0.707621
PLS1	0.0712881	0.555122	1.14698
LRGUK	0.871845	0.504288	0.0595607
USP13	0.090377	-0.423459	1.04394
SHMT1	0.262885	0.18676	0.580234
FIBIN	0.981077	-0.023825	0.00829683
FAM89B	0.849112	0.0509468	0.0710352
DPP7	0.502518	0.624419	0.298848
CYP2J2	0.072524	-1.2068	1.13952
IGF1	0.92287	0.390559	0.0348594
MYRF	0.850624	0.131223	0.0702623
FNDC3B	0.780305	-0.0982046	0.107735
AP2M1	0.0121113	0.287037	1.91681
ABCF3	0.863233	0.0892306	0.0638719
PTCH2	0.151385	1.53393	0.819918
RAB30-AS1	0.020406	0.536211	1.69024
[truncated: 13,514 more rows]
