# Supplementary material for: MLL-AF4 and a murinized pSer-variant thereof are turning on the nucleolar stress pathway
Source: Cell Biosci. 2022 Apr 25;12:47. doi: 10.1186/s13578-022-00781-y (PMC9036721; doi:10.1186/s13578-022-00781-y)
Supplement: Supplementary file 12 — Additional file 12: MA4m_A4M volcano. [file 13578_2022_781_MOESM12_ESM.xlsx]

## Sheet: Sheet1
gene symbol	pvalue	log2	minus log 10
MADD	0.114591	0.401693	0.940849
MAST2	0.750385	-0.0841626	0.124716
STRN	0.691162	0.0785597	0.16042
PCLAF	0.539198	0.0545806	0.268252
ZNF32	0.385597	0.150861	0.413867
LDB2	0.953967	0.313249	0.0204665
HIST1H1E	0.51276	0.635139	0.290086
LURAP1L	0.315911	-1.35542	0.500436
PDHB	0.0643921	0.165922	1.19117
MRPL49	0.857852	0.0244544	0.0665878
SCP2	0.0144831	0.25212	1.83914
CDC42EP2	0.456333	0.246832	0.340718
RGPD6	0.665109	-0.122573	0.177107
PROX1-AS1	0.796544	-0.53114	0.0987903
ATP6V1E2	0.950495	0.026693	0.02205
KLHL17	0.669334	-0.18721	0.174357
WDR64	0.770353	1.57131	0.11331
NUDT3	0.539565	-0.0745354	0.267957
KIF26B	0.546066	-0.376546	0.262755
KLHL35	0.809261	-1.30112	0.0919114
MYOCOS	0.661414	-0.414466	0.179527
EIF4ENIF1	0.225591	0.259437	0.646678
TRIM46	0.54644	-0.539141	0.262457
ARPC2	0.538362	0.0433678	0.268925
TSACC	0.71795	0.159482	0.143906
CCT3	0.323577	0.0495339	0.490022
NFIA	0.732541	-0.056566	0.135168
SLC39A9	0.295026	-0.174764	0.530139
BCLAF1	0.0296871	0.173095	1.52743
DIRAS3	0.108743	-2.24697	0.963598
VAMP8	0.0590718	0.477254	1.22862
ACTR1B	0.371151	-0.149122	0.430449
RSF1	0.716419	0.0640649	0.144833
EMP2	0.59017	-0.0768019	0.229023
KCTD11	0.992094	-0.00674811	0.00344716
SZRD1	0.290678	0.121063	0.536587
LRP5	0.774567	-0.0789848	0.110941
TBCE	0.252762	0.151848	0.597288
PDZD9	0.725145	-1.04731	0.139575
RTKN2	0.596337	0.0889006	0.224508
PNMA8A	0.741011	-0.0515405	0.130175
FARP2	0.855286	0.0306393	0.0678884
KIAA1324L	0.75814	-0.0965436	0.120251
SP8	0.230011	0.625453	0.638252
MIOS	0.802554	0.0575137	0.095526
MOB1A	0.85552	-0.0195965	0.0677698
MAML1	0.229025	0.205654	0.640118
TIAL1	0.791727	-0.0249082	0.101425
ARMC3	0.96375	-0.112465	0.0160358
MELK	0.774918	0.041252	0.110744
SLITRK5	0.0299702	-0.340967	1.52331
MYL12A	0.098079	0.177265	1.00842
MYOM1	0.939375	0.412517	0.0271611
ZNF778	0.465091	0.22415	0.332462
CNOT7	0.874287	-0.0189417	0.0583462
TMEM184B	0.336392	0.13415	0.473155
MTOR	0.966862	-0.00652013	0.0146353
ZNF768	0.649333	0.0724942	0.187533
ZNF521	0.452358	0.525273	0.344518
ZNF81	0.992574	0.00569922	0.00323698
MAGEB3	0.807793	1.3121	0.0927
KLHDC1	0.83305	-0.344542	0.0793289
DRAP1	0.865253	-0.0243461	0.0628571
LONRF3	0.829023	-0.137658	0.0814333
MCMBP	0.958014	0.00527333	0.0186282
FAM171A2	0.386565	0.259754	0.412777
KLHL20	0.275794	-0.259514	0.559416
SCHIP1	0.942592	-0.0205883	0.0256763
TOB2	0.222782	-0.200671	0.65212
SNAI1	0.859775	0.183407	0.0656153
MOCS3	0.990764	0.00343613	0.00402976
STAU1	0.770451	-0.0310488	0.113255
CDH26	0.740053	-0.66772	0.130737
PTGIS	0.93631	0.316082	0.0285804
ZNF444	0.811452	-0.0483397	0.0907374
SPTY2D1OS	0.902448	-0.0543224	0.0445779
RPL26	0.0929239	-0.103166	1.03187
PAQR5	0.379613	-0.269588	0.420659
UBE2J2	0.365099	0.131493	0.437589
TBC1D23	0.617378	0.108617	0.209449
OAZ1	0.000395764	0.216719	3.40256
HS3ST1	0.249205	1.4456	0.603443
CD99	0.633317	0.0396807	0.198379
RPS27	0.177978	0.0915142	0.749633
BET1L	0.432275	-0.145217	0.36424
RPL23A	0.090827	-0.0944522	1.04178
G2E3	0.273738	-0.187008	0.562665
ITM2C	0.962744	-0.00700129	0.016489
USP37	0.369795	0.195463	0.432039
TTLL4	0.451309	-0.171513	0.345526
HECTD1	0.136124	-0.236854	0.866066
PEX3	0.635597	0.0920589	0.196818
SERPINE2	0.284586	-0.244247	0.545786
PSMG3-AS1	0.710025	0.202328	0.148726
EID2	0.372671	-0.138773	0.428675
CRLF3	0.970755	0.00777037	0.0128903
RNPEP	0.906692	0.0135268	0.04254
DMRTA1	0.850037	0.336141	0.0705622
NUFIP1	0.793047	0.0605959	0.100701
MARS2	0.72636	0.0769659	0.138848
DHRS13	0.641013	0.169749	0.193133
CACNB3	0.910863	0.0489831	0.0405472
KLRG2	0.894191	-0.0522548	0.0485698
CKMT1B	0.668479	0.0682146	0.174912
ADAMTS6	0.262139	-1.29969	0.581468
KPNA6	0.7919	-0.0237615	0.10133
TMEM80	0.134748	-0.25901	0.870478
TEP1	0.851417	0.0906167	0.0698579
SIX5	0.990539	0.00385749	0.00412845
TOB1	0.0177435	0.324408	1.75096
ZFAND4	0.331997	0.412701	0.478866
HEXDC-IT1	0.920286	0.403165	0.0360771
GAD2	0.785959	1.46328	0.1046
ABI1	0.288442	0.163927	0.539941
YME1L1	0.0558763	0.167918	1.25277
NOTCH2NL	0.583161	-0.389485	0.234212
ZNF536	0.965275	0.0186893	0.015349
KISS1R	0.932775	-0.127629	0.0302229
ARID3A	0.163922	0.205996	0.785363
EPAS1	0.253781	0.358818	0.595542
STRC	0.913726	0.321143	0.0391838
ANKRD20A3	0.797386	-0.346812	0.0983313
MSRB3	0.477302	0.187144	0.321207
VWA8-AS1	0.918937	-0.372937	0.0367145
MTCH1	0.0116593	0.243925	1.93333
NRM	0.264047	-0.297042	0.57832
PPP1R3E	0.0163786	-0.804598	1.78572
YBX3	0.735752	-0.0220626	0.133268
MAP3K10	0.261293	0.779893	0.582872
NPAS1	0.220608	-0.593238	0.656378
GMFG	0.586303	-0.698111	0.231878
TENM1	0.00196899	-1.48655	2.70576
PAUPAR	0.486153	-0.554308	0.313227
FAM215B	0.882122	0.127156	0.0544714
HPS5	0.00537511	0.806866	2.26961
RANBP1	0.878297	0.0088142	0.0563584
SPIRE1	0.579322	0.138663	0.23708
BTBD1	0.753223	-0.0450739	0.123076
LBHD1	0.537103	0.0784286	0.269943
HSD17B10	0.00303902	0.273779	2.51727
AK1	0.0173674	0.380346	1.76026
SMC1A	0.622177	-0.039208	0.206086
GNAT2	0.834769	-0.946249	0.0784337
PRPF38B	0.0983182	-0.213857	1.00737
GSTM1	0.992102	0.00256897	0.00344368
BCL2L2	0.733122	-0.0905937	0.134824
TUBG2	0.426842	-0.373262	0.369733
ZCWPW1	0.113891	-1.24731	0.94351
AP2S1	0.370069	0.0787939	0.431718
ITGB8	0.225649	-1.60574	0.646566
PON2	0.593312	0.0927381	0.226717
COPZ1	0.50442	-0.0581033	0.297207
HBP1	0.755155	-0.0770223	0.121964
GEMIN7	0.365093	0.162427	0.437596
SEMA3B	0.829443	0.248256	0.0812132
SMPD2	0.307329	-0.409825	0.512397
RPL31	0.152553	-0.0801767	0.816578
ZNF343	0.657022	0.169018	0.18242
METTL21C	0.953967	0.313249	0.0204665
MAB21L1	0.227702	0.79839	0.642634
EMX1	0.524841	-0.371355	0.279972
YOD1	0.0847587	0.288867	1.07182
CHM	0.605298	-0.10713	0.218031
SMYD5	0.897252	0.0374034	0.0470853
RAB11FIP5	0.0858734	-0.472694	1.06614
DYSF	0.510355	1.23986	0.292128
CCDC142	0.205752	0.653476	0.686656
EBP	0.795001	-0.0303441	0.0996324
SLC7A11-AS1	0.939375	0.412517	0.0271611
NCBP2	0.00297755	0.380148	2.52614
HDLBP	0.0232287	-0.179372	1.63397
MMP25-AS1	0.630083	0.210793	0.200602
MEGF6	0.347001	-2.57246	0.459669
SMIM2-AS1	0.724293	-0.266325	0.140085
MIS18A-AS1	0.754495	0.327208	0.122344
AURKC	0.550346	-2.27399	0.259364
CGB1	0.698525	-2.06325	0.155818
AZIN2	0.459522	0.447439	0.337694
ANO7	0.814203	0.187877	0.0892673
GRIK2	0.847943	-1.03766	0.0716334
GJB7	0.893324	0.362244	0.0489908
CGRRF1	0.0319915	-0.510794	1.49496
FAM76B	0.379794	0.222978	0.420452
DPY30	0.678954	0.0418312	0.16816
PLEKHB1	0.0840962	0.569938	1.07522
CHADL	0.939375	0.412517	0.0271611
EP300	0.839594	0.0320751	0.0759306
L3MBTL2	0.219128	0.212959	0.659303
FAM72A	0.616404	0.109888	0.210134
CACNA1H	0.936263	0.0358816	0.0286023
SLC22A4	0.830229	0.536185	0.0808024
CSNK1G3	0.841718	-0.0327776	0.0748333
AGPAT4	0.0423201	-0.451117	1.37345
LRRC37B	0.461205	0.253854	0.336106
MTHFS	0.0118164	-0.361983	1.92751
MIXL1	0.924619	0.105543	0.034037
BCL7B	0.732424	0.0554702	0.135237
YKT6	0.849358	-0.0256193	0.0709092
LMO7-AS1	0.306447	-1.53724	0.513645
TBL2	0.152893	-0.231932	0.815613
CHN2	0.53264	0.297576	0.273566
CLEC4F	0.904332	-0.160353	0.0436721
TTC13	0.0714503	0.379595	1.146
NQO2	0.082751	0.317895	1.08223
GALNT2	0.327746	0.111342	0.484462
PEX6	0.211147	0.863867	0.675415
OR51E2	0.939375	0.412517	0.0271611
TRIM68	0.243868	0.449982	0.612844
POMT2	0.91951	-0.0257502	0.0364433
PSME2	0.176618	-0.234897	0.752966
CYBC1	0.00417384	0.657232	2.37946
PFAS	0.287844	-0.144114	0.540843
HYI	0.573443	-0.146698	0.24151
IRF2	0.859339	-0.0758242	0.0658355
MOBP	0.872824	0.866282	0.0590731
PFKFB4	0.617578	-0.243617	0.209308
PQLC2	0.902845	0.0279697	0.0443868
AP1S3	0.554618	0.201286	0.256006
MAMDC2-AS1	0.373912	-2.37402	0.427231
ANAPC1	0.992025	-0.00184043	0.00347751
WEE2-AS1	0.887174	0.167347	0.051991
PDIA3	0.000140415	-0.418207	3.85259
PLCG1-AS1	0.566326	1.86156	0.246933
WT1-AS	0.637748	-0.786904	0.195351
CDC25A	0.0968879	-0.192658	1.01373
PRR36	0.207585	-0.834157	0.682805
EMC6	0.175461	0.150004	0.755818
RPS28	0.246694	-0.0682847	0.607841
MARCH10	0.812561	1.09519	0.0901441
TAF1L	0.809259	-1.30114	0.0919126
ACO1	0.222255	0.22449	0.653149
ARNTL2-AS1	0.990457	-0.0643446	0.00416453
MARCH8	0.156955	0.376352	0.804224
ADK	0.394686	-0.108496	0.403749
PKD1L1	0.953969	0.313235	0.0204656
SYN1	0.547738	0.637823	0.261427
IQCN	0.811495	1.28655	0.0907143
PSMB4	0.0617518	0.103816	1.20935
SSBP4	0.825303	-0.0457838	0.0833864
GDF15	0.2104	0.646859	0.676954
PGPEP1	0.338273	0.30113	0.470733
MED30	0.871537	0.036448	0.059714
SLC30A8	0.939375	0.412518	0.0271611
RAD21	0.307265	0.0919032	0.512487
PEX2	0.151234	0.28546	0.820351
LAMC2	0.938037	-0.0929131	0.0277801
SYNJ1	0.64562	0.116856	0.190023
LARP1	0.00102938	-0.247592	2.98742
PAXBP1	0.158844	0.266397	0.79903
QPCTL	0.240665	-0.445997	0.618587
HFE	0.939375	0.412515	0.027161
ADH1B	0.716583	-1.96588	0.144733
SSUH2	0.367079	-3.08366	0.435241
PHLPP1	0.434614	0.228237	0.361896
TEX11	0.953968	0.313241	0.020466
VPS16	0.0576503	0.497157	1.2392
ABCB4	0.279361	-1.96463	0.553835
FLT4	0.402194	-0.213759	0.395565
CCDC58	0.431597	-0.095228	0.364922
C1orf146	0.618013	0.388946	0.209002
CATSPER1	0.666103	-2.32862	0.176458
TBC1D3I	0.615224	0.796529	0.210967
HLA-DPA1	0.318271	-0.280354	0.497202
GCNT4	0.00725826	4.32271	2.13917
FUT2	0.623	-0.701649	0.205512
EFCAB5	0.999113	0.00176527	0.000385221
ZNF251	0.906065	0.0560702	0.0428405
SVIP	0.404079	0.101898	0.393533
ANKRD16	0.707289	-0.132125	0.150403
MAN1A2	0.0399393	-0.317766	1.3986
MIER1	0.114478	0.217379	0.941279
TSNARE1	0.163503	1.08415	0.786474
XKR6	0.849421	0.104331	0.0708772
ARL14	0.740837	1.10424	0.130278
RPRML	0.275219	-0.359402	0.560322
MCPH1	0.994558	0.0019832	0.00236988
LYAR	0.274351	-0.131347	0.561693
JSRP1	0.543726	0.602855	0.26462
MIDN	0.00423628	-0.410034	2.37302
PCDHGA11	0.651472	0.538037	0.186104
HDHD5	0.235779	-0.151993	0.627494
HADHA	0.904829	-0.0117739	0.0434337
PSMB9	0.0475687	-2.62153	1.32268
SORBS1	0.816422	-0.112014	0.0880855
SCARNA22	0.243507	0.498299	0.613489
EAF1-AS1	0.947427	0.109233	0.0234542
MAGED4B	0.330483	0.203937	0.480851
WDR31	0.47918	0.604981	0.319501
RNF128	0.233693	0.325272	0.631354
BEX2	0.000206218	-0.451519	3.68567
MORC4	0.535559	-0.102307	0.271193
POLE3	0.529519	-0.0586293	0.276118
PLA2G12B	0.525895	-3.37191	0.279101
PDK4	0.934323	-0.07862	0.0295031
CTDSP1	0.792964	0.0582012	0.100747
PDZD4	0.614884	-0.275375	0.211207
CREB5	0.201304	-0.221697	0.696147
CES3	0.890334	-0.0672514	0.0504469
KSR1	0.0667207	0.721483	1.17574
HMGA1	4.83713e-05	-0.328351	4.31541
FGFR2	0.535115	-0.138842	0.271553
PARP14	0.68363	-1.83237	0.165179
DHX8	0.417775	-0.139811	0.379058
MEF2D	0.258041	-0.27685	0.588311
CAMK2A	0.953968	0.313241	0.020466
CCDC183	0.59122	-0.366047	0.228251
SLC35C2	0.724641	0.07033	0.139877
CDKN2B	1.63084e-15	1.86775	14.7876
CDKN2A	0.059487	-0.120126	1.22558
AMMECR1	0.349084	0.152816	0.45707
CHRDL1	0.181337	1.57073	0.741513
PLD6	0.100608	-0.358391	0.99737
HBZ	0.230844	-1.92385	0.636682
PNPLA7	0.600588	-1.01948	0.221423
DNTTIP2	0.0511426	0.24891	1.29122
SUB1	0.0949413	0.104142	1.02254
GOLPH3	0.594842	-0.0792826	0.225598
FMO4	0.447282	0.483513	0.349419
MED14OS	0.815359	-0.240474	0.0886511
SKIDA1	2.87793e-06	1.56935	5.54092
SPAG4	0.629161	0.40675	0.201238
HIST1H2BC	0.910467	0.100364	0.0407356
SDHA	0.971539	0.00451819	0.0125399
NPIPB12	0.60396	-0.198894	0.218992
RPL6	0.0125747	-0.128359	1.9005
SNX5	0.711559	0.0306936	0.147789
ORAI3	0.0520815	0.586061	1.28332
TRABD2B	0.579039	-0.393529	0.237292
CDK18	0.591814	-0.156294	0.227815
GPR89A	0.483498	-0.136123	0.315605
FGF8	0.768271	0.751686	0.114486
NPM3	0.021371	-0.245884	1.67017
SUPV3L1	0.572732	0.0865758	0.242048
FAM122C	0.565099	-0.252275	0.247875
FAM122B	0.668972	0.0581062	0.174592
LACTB	0.619137	-0.128343	0.208214
CORO2B	0.518119	1.17908	0.285571
ABCA7	0.817398	-0.128013	0.0875662
ARHGEF1	0.978254	0.0080124	0.00954851
XAB2	0.460984	0.276979	0.336314
TOR1AIP1	0.919128	0.0157952	0.0366238
RGS16	3.96005e-06	-1.24441	5.4023
ROPN1	0.939375	0.412518	0.0271611
THAP9	0.848615	-0.0817409	0.0712891
TSPYL1	0.140733	0.123273	0.851603
RNF187	0.581505	0.0447567	0.235446
MAK	0.635435	-0.354076	0.196929
RSPH4A	0.30253	1.78297	0.519232
RWDD1	0.189802	-0.121346	0.721698
FOXP1-AS1	0.666103	-2.32862	0.176458
CFAP54	0.176767	2.29286	0.752599
FUNDC1	0.0152172	0.340318	1.81767
SCAMP5	0.324431	-0.289124	0.488877
SUPT7L	0.64915	-0.0681758	0.187655
HGF	0.953967	0.313249	0.0204665
SPIN2A	0.905474	-0.0983074	0.0431242
NTPCR	0.924171	0.0101427	0.0342474
ABCB10	0.0098057	-0.31219	2.00852
COG2	0.018937	0.378587	1.72269
CAPN9	0.634036	1.50399	0.197886
KDM6A	0.265924	0.245499	0.575243
ADGRA3	0.858122	-0.0512851	0.066451
EME2	0.460623	-0.33182	0.336655
COMTD1	0.164143	-0.225581	0.784777
MR1	0.0259136	0.703895	1.58647
PTRH1	0.508299	-0.230327	0.293881
PARP11	0.858685	-0.0582932	0.0661662
PNLIPRP1	0.896125	0.549433	0.0476312
PPP1R32	0.474364	1.05986	0.323889
ZNF48	0.990246	-0.00257191	0.00425678
GOLGA8M	0.939375	0.412517	0.0271611
MTFR1	0.824956	-0.0334492	0.0835694
KCNIP4	0.159739	-2.22147	0.796588
SPTLC1	0.0862866	-0.248227	1.06406
NFATC2	0.346832	-2.29749	0.459881
RIMS4	0.0457285	0.603862	1.33981
MAGEA12	0.657693	0.975431	0.181977
VEGFA	2.58782e-06	-0.883003	5.58707
JMJD6	0.00144223	0.504277	2.84097
ZNF578	0.953968	0.313241	0.020466
GNPTG	0.767872	0.059737	0.114711
SENP7	0.850059	0.0593131	0.0705507
DDOST	0.017473	-0.197047	1.75763
COG5	0.118326	-0.366221	0.926919
MYOZ3	0.953968	0.313242	0.020466
DIRC2	0.833798	0.062398	0.078939
TCF4-AS2	0.939375	0.412516	0.027161
SCG3	0.613411	-0.442798	0.212249
GABRA3	0.716583	-1.96588	0.144733
SOX21	0.785274	-0.152945	0.104979
RNF41	0.694305	-0.0759154	0.15845
SLC2A4	0.262073	-0.865157	0.581578
TRIM49	0.666101	-2.32864	0.17646
TMEM129	0.634437	-0.0899478	0.197612
SPRY3	0.173112	1.74012	0.761673
PPIC	0.1689	-0.187021	0.77237
NUP214	0.342405	-0.180316	0.46546
FAM78A	0.771898	0.160667	0.11244
GSAP	0.552455	-2.07065	0.257703
RRBP1	0.811402	-0.0450931	0.0907639
FBXO48	0.891277	0.0518391	0.0499875
UQCC3	0.273614	-0.158807	0.562862
ZNF155	0.596132	0.409288	0.224657
NFIX	0.718179	0.12265	0.143767
CEP97	0.962603	0.0116763	0.0165528
TSFM	0.971217	0.00433157	0.0126837
SEMA6B	0.185818	-1.08458	0.730913
DHDH	0.218117	-1.23348	0.66131
NUCB1	0.176085	-0.209455	0.754278
TULP2	0.577645	0.779404	0.238339
TWF2	0.236823	-0.225853	0.625576
ZNHIT1	0.81937	-0.0260889	0.08652
CLDN15	0.421314	-0.287143	0.375394
IRX3	0.551339	-0.159828	0.258581
EIF4EBP1	1.37913e-10	-0.584817	9.8604
P2RX2	0.951729	0.166135	0.0214866
VTRNA1-3	0.419349	0.474386	0.377425
MXD4	0.330499	0.133319	0.48083
ABHD2	0.266067	0.194649	0.575009
WDR93	0.762694	-0.580331	0.11765
FANCI	0.249165	-0.115722	0.603513
POLG	0.674146	-0.0711436	0.171246
ACSF2	0.446327	-0.247584	0.350346
FAM102A	0.408012	0.322466	0.389327
TMEM92	0.486046	-1.17657	0.313322
PIP5KL1	0.203862	1.75269	0.690664
HPRT1	0.0626709	-0.130241	1.20293
SAMD14	0.767982	-0.340403	0.114649
EIF1B-AS1	0.654133	0.529719	0.184334
PLK1	0.0684363	0.197045	1.16471
RNU6-2	0.5724	-0.384268	0.2423
CLPX	0.633033	0.0877813	0.198574
YY1AP1	0.58726	-0.10163	0.23117
KBTBD8	0.277226	0.393706	0.557166
FAM19A4	0.687098	0.917038	0.162982
EOGT	0.658854	0.146959	0.181211
IST1	0.423236	0.110342	0.373417
RC3H2	0.00199758	0.385419	2.6995
INKA2-AS1	0.687316	-0.318633	0.162843
CGNL1	0.99054	-0.0100699	0.00412795
DENND5A	0.0497556	-0.320885	1.30316
MYADM	0.190099	-0.30228	0.72102
SLC45A1	0.872824	0.866287	0.0590735
VAX1	0.774616	-0.173146	0.110913
ADD3	0.836804	-0.0311582	0.0773762
CHIC1	0.453128	0.321525	0.343779
DENND4C	0.335311	-0.25543	0.474552
IGFBPL1	0.912147	-0.360859	0.0399351
CLCN3	0.523749	0.10352	0.280876
BAZ2B	0.161151	0.330935	0.792768
YEATS2-AS1	0.85507	-0.940332	0.0679986
GRK3	0.828377	0.0499281	0.081772
SLC39A8	0.854077	-0.0294644	0.0685032
ENPP4	0.697663	-0.0891351	0.156354
IFNGR2	0.262054	-0.149982	0.581609
SLC25A16	0.0509034	0.48122	1.29325
SHLD3	0.897272	0.0574717	0.0470757
LOXL1	0.770738	0.144084	0.113093
ANKRD29	0.930597	-0.0432266	0.0312383
CCDC181	0.551741	-0.158152	0.258265
JAKMIP1	0.472012	0.436659	0.326047
STAG3	0.478359	1.28055	0.320246
CLVS2	0.828122	-0.155777	0.0819057
SLC10A7	0.497468	-0.217178	0.303235
C16orf87	0.712024	-0.0551314	0.147505
TBC1D32	0.326016	0.27945	0.48676
MFAP3	0.262079	0.773288	0.581567
ELOVL6	0.937287	0.0148804	0.0281275
PFKFB3	0.192607	-0.246397	0.715328
TRA2A	0.0899306	0.153096	1.04609
PRH2	0.819054	0.891525	0.0866873
ZNF627	0.848083	0.0750386	0.0715614
ZNF789	0.768776	-0.114436	0.1142
WDHD1	0.898392	-0.0229639	0.0465341
SEMA3C	0.836886	0.0613337	0.0773336
CHRNB2	0.939375	0.412516	0.027161
UBE2Q1	0.0573221	0.203598	1.24168
IL6R	0.44128	0.555083	0.355286
ADAR	0.807153	-0.0236027	0.093044
ARPC5L	0.702237	-0.0495139	0.153516
GRHL2	0.953967	0.313249	0.0204665
MRPS18A	0.0987037	0.263154	1.00567
SART1	0.993122	-0.00131112	0.00299759
TBC1D10C	0.872823	0.866295	0.059074
NAPA	0.832746	-1.03848	0.0794875
CDC37	0.971421	-0.00304673	0.0125924
RABAC1	0.135269	-0.192204	0.868802
GFPT2	0.35458	0.331114	0.450286
SLC19A3	0.116586	2.52096	0.933355
SYNGR2	0.764218	-0.0328071	0.116783
NUP210	0.988047	-0.00216685	0.00522251
SIPA1L2	0.459699	0.217586	0.337526
CACNG7	0.925246	-0.39461	0.0337429
CCDC146	0.112719	-1.64071	0.948003
LGALS3	0.24436	-0.619601	0.61197
UBQLN2	0.489265	-0.0914735	0.310456
RILPL1	0.883607	-0.046415	0.0537408
CMTM1	0.536902	-0.619033	0.270105
KRBOX1	0.939375	0.412517	0.0271611
TXLNA	0.173473	0.158151	0.760769
ARHGEF33	0.872824	0.866287	0.0590735
MTBP	0.631666	-0.167872	0.199513
SNTB1	0.0360939	-0.947573	1.44257
RNU4ATAC	0.79954	-0.214	0.0971599
INPP5E	0.459396	0.174211	0.337813
MNAT1	0.977042	0.0040088	0.0100866
MID1	0.0214621	-0.247991	1.66833
MFSD13A	0.947599	0.0158092	0.0233755
CBWD1	0.101741	0.213101	0.992506
MYOF	0.0984716	3.15476	1.00669
PTPRG	0.628049	0.119121	0.202007
ANKRD42	0.89638	0.0414968	0.0475081
PDLIM7	0.664664	0.101382	0.177398
SRP72	0.0241476	-0.222054	1.61713
DUX4	0.939375	0.412517	0.0271611
IL18BP	0.176971	-2.13376	0.752099
CNP	0.259416	0.138305	0.586003
CD3EAP	0.771101	0.0511139	0.112889
MNX1-AS2	0.646143	0.422988	0.189671
CD81-AS1	0.785957	1.46329	0.104601
RAP1A	0.660475	-0.0536928	0.180144
MRPS30	0.118541	-0.209366	0.926131
GATD3B	0.990848	0.001739	0.00399274
NNT	0.869398	-0.022003	0.0607813
HDAC1	0.00140882	0.241633	2.85114
C1GALT1C1L	0.375556	0.833645	0.425326
MADCAM1	0.522396	2.30854	0.282
ANK3	0.0212097	0.542181	1.67347
PALM	0.413442	0.246851	0.383586
GADD45B	0.631819	-0.179457	0.199408
SLC7A9	0.474635	-2.34631	0.32364
BUD31	0.786636	-0.0303134	0.104226
PDAP1	0.649003	0.0489341	0.187754
ALDH3A2	0.545178	-0.0800911	0.263461
PTCD1	0.442783	0.174791	0.353809
STRADA	0.330969	1.98691	0.480213
CD59	2.55677e-07	0.632385	6.59231
SNHG7	1.79964e-14	-0.84446	13.7448
C7orf31	0.284427	-0.425152	0.546029
FALEC	0.690498	0.651378	0.160838
SYTL1	0.894171	0.0994871	0.0485792
RARS	0.537337	0.0615958	0.269753
WWC1	0.561447	-0.170626	0.250691
SRGAP2	0.152403	0.260506	0.817005
H2AFY	0.510046	0.0533561	0.292391
SCN9A	0.539545	0.30714	0.267972
RASSF6	0.69506	0.757543	0.157978
SDC2	0.784179	-0.0320081	0.105585
UHRF1BP1L	0.265115	0.313975	0.576565
NOP2	0.898205	-0.0393473	0.0466245
GAPDH	0.0636584	-0.0951582	1.19614
CHD4	0.780281	-0.0249748	0.107749
SLC47A1	0.244512	-0.293627	0.6117
KPNA1	0.0956106	0.251886	1.01949
RPGR	0.459865	0.240818	0.337369
CHIC2	0.154146	0.369175	0.812067
BRCA1	0.949386	-0.00872238	0.0225574
ORAOV1	0.117662	0.423722	0.929362
ALDH1A3	0.811652	0.128197	0.0906302
RNF185	0.454128	0.165947	0.342822
SHISAL1	0.914491	0.0613832	0.0388206
CDR1	0.666103	-2.32862	0.176458
BOLA3	0.201325	0.110323	0.696103
CDC42EP3	0.213716	-0.34779	0.670162
DLEC1	0.939375	0.412518	0.0271611
ZSCAN21	0.509337	0.193103	0.292995
YBEY	0.321166	-0.296499	0.49327
PLSCR4	0.612119	-0.386774	0.213164
SATL1	0.679606	-0.634393	0.167743
TCTE3	0.106065	-0.75425	0.97443
UBE2G2	0.885352	0.0141715	0.0528841
SMIM10	0.353441	-0.219415	0.451683
TMEFF1	0.119842	-0.312596	0.92139
SETD2	0.208483	-0.254394	0.68093
REEP4	0.794895	0.0556983	0.0996904
TMEM30A	0.951383	-0.00769267	0.0216448
COX7A2	0.000141275	0.200297	3.84994
GMDS	0.26113	-0.188894	0.583143
WRB	0.199069	0.177029	0.700997
TNRC18	0.0889645	0.45757	1.05078
BLMH	0.379041	-0.112956	0.421314
SLC6A4	0.664138	1.52509	0.177742
BBOX1-AS1	0.640169	-0.288786	0.193706
GALNT12	0.0916215	-0.530422	1.038
NTN4	0.0629615	2.90635	1.20092
JKAMP	0.0147575	0.394624	1.83099
TIGD4	0.953967	0.313249	0.0204665
ENPP3	0.590443	1.07358	0.228822
ZNF35	0.148307	-0.922342	0.828837
ABCA6	0.664332	-1.2746	0.177615
ABCA5	0.867774	0.0441838	0.0615934
MYLPF	0.685445	-0.23782	0.164028
WASHC5	0.208516	0.199603	0.680861
RSBN1L	0.232623	-0.174499	0.633347
RPP25L	0.199755	-0.169627	0.699501
ATP5MF	7.72877e-06	0.264324	5.11189
SETD6	0.914262	-0.0205724	0.0389294
SPTSSA	0.561463	-0.0790754	0.250679
PABPC4	0.566196	-0.0473412	0.247033
LAMA1	0.0776514	-0.57163	1.10985
LRCH4	0.306723	-0.334898	0.513254
TNFAIP8L3	0.826301	0.457367	0.0828619
ZNRF3	0.935994	0.0176309	0.0287267
ADPRHL2	0.245603	-0.213873	0.609767
PNPLA4	0.98221	0.00851985	0.00779587
MPPE1	0.990923	0.00330193	0.00395999
KIAA0895	0.259706	0.305494	0.585518
UBR1	0.757886	0.0805494	0.120396
SNAPC4	0.31577	-0.264035	0.500629
TCHH	0.136173	2.94983	0.86591
VCPKMT	0.378548	-0.269865	0.421879
SOS2	0.108227	-0.499478	0.965665
DAD1	0.186692	0.0958963	0.728874
SEC23IP	0.15163	0.181578	0.819214
SPATA20	0.945697	-0.0258508	0.0242479
CACNA1G	0.332484	1.34101	0.478229
SYCE3	0.831731	0.311527	0.0800173
TOGARAM1	0.863955	-0.0625307	0.0635088
SLC9B1	0.775272	0.489443	0.110546
EVL	0.161843	-0.238349	0.790905
H2AFZ	0.0376193	0.109664	1.42459
DNAJB14	0.560226	-0.128425	0.251637
MRPL33	0.0965022	0.163499	1.01546
SNHG3	0.542167	-0.0513428	0.265867
GLMP	0.208647	0.181478	0.680588
BDH2	0.178269	0.297737	0.748925
PICK1	0.61601	0.106847	0.210412
DEPDC5	0.42225	0.265466	0.37443
GNA13	0.811351	-0.0362305	0.0907911
TTC28	0.650548	0.0833966	0.186721
HOXB8	0.365414	0.24374	0.437215
SNRPD2	0.822187	-0.0135822	0.0850295
OPA3	0.105814	0.372	0.975458
FOSB	0.731107	-0.447979	0.136019
EML2	0.441736	0.236533	0.354837
RTN2	0.124945	0.483609	0.90328
TMC4	0.57187	-1.4161	0.242702
PEPD	0.956749	-0.00685701	0.019202
CYP2S1	0.822213	0.139635	0.0850158
AXL	0.723218	-0.323375	0.140731
NFKBID	0.653616	0.309776	0.184677
URB1-AS1	0.637664	0.129039	0.195408
ACY1	0.211278	-2.59604	0.675145
SIRT1	0.0369326	0.33536	1.43259
MOGS	0.763604	0.0515446	0.117132
GEMIN8	0.875522	0.0476016	0.0577329
C8orf31	0.208269	0.956515	0.681375
DLGAP1-AS1	0.83063	0.447234	0.0805926
AVIL	0.752965	0.474172	0.123225
ZNF655	0.840031	0.0340202	0.0757047
ROR1-AS1	0.447167	-2.20637	0.349531
CASC11	0.939375	0.412517	0.0271611
MASP1	0.953967	0.313249	0.0204665
RNU5D-1	0.452494	1.81606	0.344387
CIB2	0.253722	-0.23551	0.595643
WASF2	0.298471	0.138565	0.525097
PIGV	0.140827	0.573777	0.851313
HOXD3	0.266778	-1.57254	0.573849
CHN1	0.669923	-0.11214	0.173975
MTX2	0.420383	-0.115571	0.376355
PDE11A	0.487506	-0.580336	0.31202
GTF3A	0.0731922	-0.169527	1.13554
RASL11A	0.890637	0.0723317	0.050299
GMPPB	0.00849389	-0.528977	2.07089
STEAP2	0.863964	-0.0613592	0.0635043
NEU4	0.953967	0.313249	0.0204665
ZNF622	0.0713216	-0.381075	1.14678
NEO1	0.932939	0.0180234	0.0301465
SNX33	0.75618	0.130046	0.121375
KLHL15	0.645224	-0.0840364	0.19029
FBXO45	0.762708	-0.0707215	0.117642
KCNB1	0.545695	1.09112	0.26305
CUL7	0.584281	0.1974	0.233378
SMIM5	0.939375	0.412516	0.027161
ZNF260	0.926603	0.0255522	0.0331064
TRIM36-IT1	0.555052	1.25549	0.255666
NCAN	0.652223	1.01062	0.185604
PIGS	0.327101	0.110218	0.485318
TSEN2	0.356966	-0.234892	0.447374
ZDHHC1	0.676506	0.355395	0.169728
TPPP3	0.704476	0.30584	0.152134
ADPRM	0.0966916	-0.621875	1.01461
SLC35B1	0.000641372	-0.362607	3.19289
CYSTM1	0.63087	0.0670134	0.20006
ZNF584	0.947809	-0.0251101	0.023279
ENDOU	0.828086	-1.03875	0.0819246
SLC26A10	0.868205	0.180388	0.0613776
ACVR1B	0.0164644	-0.513267	1.78345
OS9	0.244026	-0.12949	0.612564
IGF2	0.881409	0.0831013	0.0548227
LSG1	0.406401	0.220281	0.391045
SPHAR	0.605771	0.117351	0.217691
VWA8	0.00306819	-0.754083	2.51312
RGCC	0.486527	-0.272318	0.312893
ZXDB	0.501046	0.204131	0.300122
IRF9	0.235561	0.939103	0.627897
ZNF568	0.383272	0.673405	0.416493
KLHL5	0.486493	0.186661	0.312923
FAM149A	0.474337	0.497333	0.323913
EFHB	0.624441	-0.973407	0.204508
SNTG1	0.907896	-0.621063	0.0419639
GH1	0.729194	1.85846	0.137157
IFT80	0.422942	0.188333	0.373719
SLC2A8	0.848674	-0.0433338	0.0712592
STXBP1	0.96241	0.00948778	0.0166399
IK	0.255274	0.137061	0.592993
MOB3A	0.131288	0.487885	0.881776
KRCC1	0.587136	0.170018	0.231261
RAB5C	0.442293	0.0978139	0.35429
KAT2A	0.685965	0.0682899	0.163698
DHX58	0.351563	1.81261	0.453997
PM20D2	0.0414502	-0.222479	1.38247
RARS2	0.520798	-0.131663	0.283331
SCML4	0.939375	0.412517	0.0271611
HAGH	0.176666	0.197093	0.752847
ANP32C	0.880512	-0.256898	0.0552646
ZNRD1	0.562714	0.0880125	0.249712
EEFSEC	0.943599	0.0212785	0.0252127
USP53	0.564096	-0.124813	0.248647
SETD7	0.0248888	-0.319774	1.604
ACTR3B	0.677183	-0.0801754	0.169294
ARHGAP24	0.521127	0.665517	0.283056
PELI2	0.280443	0.316998	0.552155
ZNF318	0.957236	0.0137793	0.0189811
ACTR5	0.728121	0.0964484	0.137796
WFDC2	0.28983	-3.07873	0.537856
SHISAL2B	0.788557	-0.153649	0.103167
FAM83D	0.935665	-0.0154789	0.0288795
PPP1R16B	0.472821	-0.542658	0.325303
GZMA	0.953967	0.313249	0.0204665
TSPAN4	0.785278	0.0785908	0.104977
KNL1	0.334044	0.2003	0.476196
ALG14	0.954268	0.0103036	0.0203296
HAUS2	0.760561	-0.0580632	0.118866
RTF1	0.0553371	-0.248868	1.25698
PARP6	0.183499	-0.336284	0.736367
POP7	0.247609	-0.130164	0.606234
BNC2	0.0721363	-0.905192	1.14185
FAM222B	0.639563	0.0956146	0.194116
HECTD4	0.335068	0.21764	0.474867
SLC12A9-AS1	0.533195	-0.635538	0.273114
ARHGAP4	0.410039	0.722004	0.387175
NEDD8-MDP1	0.687389	0.0898375	0.162798
LRPPRC	0.00325598	-0.262469	2.48732
MZF1-AS1	0.851912	0.138733	0.0696053
C19orf70	0.287637	0.122522	0.541155
SH3RF3-AS1	0.589554	-1.22985	0.229476
ATRX	0.218096	-0.155731	0.661353
OGFR-AS1	0.847944	-1.03765	0.0716328
RALB	0.01199	0.536322	1.92118
PDGFB	0.919282	0.402591	0.0365514
TMEM218	0.331359	0.186989	0.479701
ACR	0.635302	-1.97088	0.197019
CABP7	0.409409	-1.75077	0.387843
RPL3	0.00412425	-0.151655	2.38465
ZMAT5	0.459565	0.176631	0.337653
R3HCC1	0.691881	0.0768444	0.159968
FANK1	0.0312595	3.89708	1.50502
SASS6	0.473701	-0.121222	0.324496
UCKL1-AS1	0.489977	2.00511	0.309824
CFAP65	0.842701	0.127073	0.0743265
WFDC10B	0.839714	1.09258	0.0758688
PRSS16	0.16375	-0.540895	0.785819
SRPRA	0.257338	-0.14671	0.589496
DLX3	0.621322	-0.736992	0.206683
SPA17	0.0412944	0.403504	1.38411
HUWE1	0.385011	-0.0947599	0.414527
FBXL19-AS1	0.289389	-0.855098	0.538519
HEXDC	0.14228	-0.43232	0.846857
TIAM1	0.162574	0.292015	0.788948
SNHG15	0.00246783	-0.407863	2.60768
DTYMK	0.586146	0.049523	0.231994
ATG4B	0.942236	-0.0124073	0.0258405
ING5	0.642018	-0.0875631	0.192453
TAP1	0.965485	0.0113201	0.0152546
OCLN	0.427185	0.230918	0.369384
CFAP299	0.895421	0.364993	0.0479727
IFNA14	0.988	-0.0625538	0.00524312
C11orf71	0.962271	0.0152153	0.0167026
HARBI1	0.843126	0.0950806	0.0741077
MPG	0.260645	-0.156389	0.58395
C4orf33	0.0423351	0.461126	1.3733
FRMD4A	0.756919	0.112267	0.120951
HNRNPU	0.64581	0.0269525	0.189895
ANGEL1	0.725994	0.0975809	0.139067
TUT1	0.913286	-0.0259168	0.0393932
IP6K2	0.385315	0.121424	0.414184
MGAT5B	0.874072	-0.117108	0.058453
FANCD2OS	0.947612	0.314153	0.0233694
PRRT3	0.11413	0.616684	0.942601
TOP1MT	0.411195	-0.158012	0.385952
IL17RE	0.757114	-0.509827	0.120839
CRELD1	0.0405751	-0.593256	1.39174
SRP68	0.443106	-0.0788894	0.353492
MRPL43	0.943078	0.00714345	0.0254525
ST6GALNAC4	0.0131735	-0.708356	1.8803
KANTR	0.449636	-0.218136	0.347139
DNAJC27	0.363175	-0.44957	0.439884
DAB2IP	0.217421	0.392566	0.662698
POMC	0.248879	1.57117	0.604011
RAD51	0.962297	0.0456141	0.0166908
DDN-AS1	0.926724	0.110988	0.0330494
GALNT8	0.435298	-1.00704	0.361213
CCNB2	0.350024	0.123807	0.455903
PLEKHF1	0.0250977	-1.46291	1.60037
RNF111	0.234704	0.335814	0.62948
MAP2K6	0.727744	0.0800261	0.138022
CLMN	0.87046	-0.0600086	0.0602512
PLCH2	0.764591	1.19536	0.116571
SGCE	0.249247	0.298595	0.60337
RBM48	0.409669	0.239763	0.387567
CASD1	0.605053	-0.164262	0.218207
FLYWCH2	0.971639	0.00710353	0.0124949
ZNF716	0.937935	0.315773	0.0278274
SLFN5	0.790807	0.149706	0.101929
PAQR4	0.700693	-0.0807834	0.154472
AGAP1	0.155327	0.323464	0.808754
SKA3	0.613187	-0.111632	0.212407
PRAP1	0.862271	-0.938382	0.0643561
MICU2	0.803096	-0.0385186	0.0952323
SLITRK1	0.664523	0.984053	0.17749
GALNT11	0.00461818	0.415197	2.33553
TMEM151B	0.779045	-1.38928	0.108438
FAR1-IT1	0.953967	0.313249	0.0204665
ANGPT1	0.788369	-1.28953	0.10327
TMED4	0.0862326	-0.181421	1.06433
SETD4	0.66375	0.11921	0.177996
DNAJB11	3.32911e-12	-0.888607	11.4777
MASP2	0.765885	-0.970478	0.115836
RORA-AS1	0.625892	0.938839	0.203501
NEAT1	0.0551462	-0.321026	1.25848
PRPF6	0.556211	0.08681	0.25476
CTSZ	0.84443	-0.114998	0.0734363
ABCC11	0.525075	-1.39473	0.279779
TENT4B	0.512147	0.12176	0.290605
CTDSP2	0.508724	0.11863	0.293518
CKAP5	0.841007	-0.0218613	0.0752006
HTR1D	0.61766	0.665859	0.209251
SLITRK4	0.68849	1.26048	0.162102
OR10A2	0.682468	-1.20984	0.165918
CHCHD7	8.66878e-06	0.600889	5.06204
ZNF33B	0.503843	-0.131708	0.297705
FMC1	0.769039	0.0248664	0.114051
IQSEC2	0.909066	0.0440075	0.0414048
MFSD14B	0.634973	0.0618774	0.197245
ZNF682	0.866584	-0.394213	0.0621892
SRC	0.790959	0.0977135	0.101846
PGAP1	0.0258937	-0.500158	1.58681
GRASP	0.449964	0.584181	0.346823
ZNF772	0.224618	0.740643	0.648555
AP2B1	0.246047	0.17091	0.608981
LIAS	0.678572	0.123296	0.168404
TMEM156	0.666103	-2.32862	0.176458
TAC1	0.766137	0.428732	0.115694
PDS5A	0.0678843	-0.233601	1.16823
ZYG11A	0.199105	0.423997	0.700918
ARRDC1-AS1	0.0739849	0.536296	1.13086
FAN1	0.751122	0.0855147	0.124289
EIF1AY	0.862271	-0.938382	0.0643561
ZNF707	0.979257	-0.0180791	0.00910314
MAGEB6	0.808169	1.28648	0.092498
CDK5R1	0.569636	-0.198197	0.244402
TNFRSF1B	0.894357	0.36361	0.0484892
PLPP1	0.756176	0.0858553	0.121377
RIIAD1	0.953967	0.313249	0.0204665
STX18-AS1	0.731365	-0.295843	0.135866
PHGDH	2.95054e-06	-0.337282	5.5301
CSAG3	0.95712	0.0238805	0.0190337
IREB2	0.0345753	-0.2251	1.46123
ZSWIM3	0.366576	0.487874	0.435836
ZNF750	0.904973	0.286489	0.0433643
RNF157	0.0145526	-0.525545	1.83706
ULK1	0.572619	0.146949	0.242135
SECTM1	0.539102	-0.445298	0.268329
CBX8	0.0572216	-0.432255	1.24244
BANP	0.618966	-0.117696	0.208333
PPP1CA	0.245874	0.105412	0.609287
HCFC1	0.131898	0.157179	0.879762
TAS1R1	0.716583	-1.96588	0.144733
UQCRH	0.992451	0.000474652	0.00329075
SLC39A4	0.832432	-0.0438353	0.0796514
GPAM	0.576232	0.129757	0.239403
OBSCN-AS1	0.877624	0.146557	0.0566914
MRPL55	0.34926	-0.0846349	0.456851
KIAA1191	0.524367	-0.064052	0.280364
CNOT6	0.194655	0.170069	0.710734
PRKG1-AS1	0.312786	-3.0804	0.504753
TP63	0.666101	-2.32864	0.17646
SLC25A22	0.101629	0.348378	0.992981
DDX24	0.45121	-0.0791519	0.345621
C21orf91	0.0806511	0.362267	1.09339
EPHA8	0.0555573	-0.95854	1.25526
OSBPL3	0.882809	-0.0390392	0.0541331
TEX15	0.400605	-0.504393	0.397284
HCN4	0.114803	-2.32458	0.940048
S100P	0.328666	-1.73769	0.483245
NTS	0.961174	0.0532104	0.0171979
APOBEC3D	0.347613	0.833081	0.458903
FARS2	0.685952	-0.113089	0.163706
CD81	0.702054	-0.0311329	0.15363
ST6GAL2	0.731853	-1.2688	0.135576
DERA	0.373499	0.158419	0.427711
KLHL12	0.239812	0.21285	0.620129
RGS4	0.913658	-0.115529	0.0392163
CTBS	0.00840757	-0.738224	2.07533
SSX2IP	0.795017	0.0390015	0.0996235
IGSF21	0.911707	-0.147335	0.0401445
SHLD1	0.323532	0.396915	0.490083
JMJD1C	0.414802	0.236129	0.38216
EEF2K	0.641604	-0.113322	0.192733
CRYM	0.254268	0.871605	0.594709
MTMR8	0.708989	-0.440571	0.14936
ZNF416	0.808294	0.177753	0.0924306
MARCH3	0.240468	0.469428	0.618943
YPEL2	0.921964	0.0414837	0.035286
SYCP3	0.832458	-0.361784	0.0796375
NEDD1	0.560498	0.118361	0.251426
GAS2L3	0.751111	-0.0946301	0.124296
CHMP1A	0.166842	0.227979	0.777694
SUGP2	0.329631	0.135828	0.481972
CAMKMT	0.879913	-0.0520113	0.0555601
UGGT2	0.23665	-0.304781	0.625894
ZFP14	0.466985	-0.372368	0.330697
COL25A1	0.113474	-0.563569	0.945103
SOCS6	0.303309	-0.332296	0.518115
LMNB2	0.847941	-0.0175438	0.0716344
CPNE1	0.0832017	-0.236897	1.07987
MVK	0.0901678	0.313767	1.04495
SEPSECS	0.590493	0.242505	0.228786
TTR	0.785957	1.46329	0.104601
B4GALT6	0.159979	0.258894	0.795936
GLB1L2	0.571639	-0.158549	0.242878
LRRC49	0.861075	0.0528576	0.064959
PPP6R1	0.210708	-0.996109	0.67632
TUBGCP4	0.54234	0.106824	0.265728
DGCR2	0.482649	0.0958412	0.316369
CNTNAP4	0.666103	-2.32862	0.176458
FAM83F	0.710936	1.07687	0.148169
ANKRD55	0.953967	0.313249	0.0204665
HINFP	0.321736	-0.234681	0.492501
BSG	0.323476	-0.078276	0.490158
PPL	0.332937	-1.53771	0.477638
EEF2KMT	0.242587	-0.32541	0.615133
CYP4X1	0.409365	-1.37345	0.38789
ZNF75D	0.687641	0.144878	0.162638
ETFRF1	0.905718	0.025099	0.0430068
UNC50	0.180989	-0.187925	0.742349
TIMMDC1	0.0284301	0.241567	1.54622
CRYBA1	0.791351	1.09753	0.101631
NUFIP2	0.827728	0.0251116	0.0821126
KLHDC4	0.499262	-0.142846	0.301672
MCM4	0.996145	-0.000346645	0.00167725
ARF3	0.523977	0.0660941	0.280688
PIK3R4	0.829819	-0.0425409	0.0810164
ZNF775	0.21534	0.391249	0.666875
PIWIL1	0.233861	3.15643	0.631043
ZNF777	0.950904	-0.0169724	0.0218634
BLOC1S5-TXNDC5	2.37709e-10	-0.523528	9.62395
TRAPPC2	0.717846	-0.0665043	0.143969
ZNF605	0.318677	-0.498021	0.496649
LRP10	0.281316	0.248842	0.550805
PEX11G	0.998964	-0.000793415	0.000450157
PIGT	0.00216777	0.41647	2.66399
SVIL	0.162212	0.580229	0.789917
C17orf102	0.953968	0.313241	0.020466
FSIP1	0.681165	0.628436	0.166748
MATN4	0.513186	-1.04326	0.289725
SLC17A7	0.660923	0.451659	0.179849
PELI1	0.449295	0.201016	0.347469
PCSK6-AS1	0.911411	-0.0941141	0.0402857
RC3H1-IT1	0.872823	0.866295	0.059074
PHLDB1	0.0727292	0.556105	1.13829
ANKRD13A	0.069333	-0.372282	1.15906
EFCAB10	0.0546873	-1.10545	1.26211
APBA1	0.472202	-0.697407	0.325872
PAPOLB	0.562224	-0.541928	0.250091
TCF7L1	0.590498	-0.230536	0.228782
TMEM245	0.837882	0.0293834	0.0768169
PRUNE2	0.763475	0.134755	0.117205
SMPD3	0.876603	0.207734	0.0571969
VTI1A	0.11464	0.378922	0.940665
COG4	0.124709	0.292034	0.904102
PRAG1	0.5389	-0.539271	0.268492
DNLZ	0.89254	0.0354314	0.0493725
GPATCH11	0.922133	-0.0201753	0.0352066
HSPB8	0.900514	0.0952849	0.0455094
SFRP4	0.97943	-0.0884444	0.00902638
NUP93	0.418088	0.103291	0.378732
CENPT	0.123863	0.37154	0.907059
TSNAXIP1	0.745957	0.374506	0.127286
MEST	0.654549	0.678772	0.184058
CNTN1	0.649717	-0.13222	0.187276
MPI	0.0597358	-0.220918	1.22377
ADORA2A-AS1	0.939375	0.412516	0.027161
CTTNBP2NL	0.145478	0.346643	0.837202
H1FOO	0.939375	0.412517	0.0271611
SCARNA1	0.183443	2.15617	0.736499
ZNF550	0.143617	-0.752724	0.842796
ZBED5-AS1	0.00163146	1.18968	2.78742
PPP2R3C	0.130704	0.254379	0.88371
NKAIN3	0.716583	-1.96588	0.144733
ZNF267	0.539803	0.164283	0.267765
RNPC3	0.623367	-0.121236	0.205256
RACK1	0.0239922	-0.125349	1.61993
DISP3	0.992531	-0.0459861	0.00325597
CDRT4	0.0448069	-0.708836	1.34866
GNB4	0.253464	0.17594	0.596083
SCN8A	0.411463	0.68072	0.385669
CCDC183-AS1	0.812566	0.577306	0.0901413
ADAMTS10	0.971824	0.0565695	0.0124124
ASB7	0.78791	0.0726919	0.103523
GTF2H2C	0.457851	-0.154898	0.339275
ANKZF1	0.270918	-0.328069	0.567163
HDAC11	0.27206	0.482281	0.565336
CWC22	0.945673	0.014769	0.024259
AZI2	0.618674	0.067901	0.208538
TGFBR2	0.142432	-0.504913	0.846394
SERF1B	0.714561	0.0513841	0.145961
SMN2	0.37941	-0.119255	0.420892
GRB10	0.877185	0.0254187	0.0569087
ADCY10	0.78295	-0.726323	0.106266
LAMB3	0.926557	-0.384667	0.0331281
ABHD11	0.202582	0.408047	0.6934
ALG9-IT1	0.716583	-1.96588	0.144733
ZNF436	0.879283	-0.0590177	0.0558712
HNRNPR	0.908285	0.00829849	0.0417778
MAEA	0.282943	0.140727	0.548301
COBL	0.700926	0.124999	0.154328
MGST1	0.0694719	0.24253	1.15819
STK33	0.512248	0.249884	0.29052
PTGER3	0.391504	-2.01564	0.407264
FASTK	0.0300359	0.469928	1.52236
TMUB1	0.4416	0.118192	0.354971
PHKA2	0.176577	0.400624	0.753066
C9orf85	0.162115	-0.317021	0.790176
TSKU	0.366074	-0.302964	0.436431
IGIP	0.884977	0.0620865	0.0530681
PIK3AP1	0.400407	0.519596	0.397498
KIF24	0.632616	-0.209092	0.19886
DPF1	0.986939	0.00589624	0.00570961
ARAP1	0.204422	0.29906	0.689472
FAT4	0.89418	-0.0744279	0.048575
S100A4	0.984234	0.0162955	0.00690176
PLEKHG4	0.00833493	-0.724075	2.0791
ZNF250	0.501003	-0.317606	0.30016
WDSUB1	0.704617	0.0996733	0.152047
ZNF79	0.65492	0.279114	0.183812
RAC2	0.465195	-1.10634	0.332365
LIF	0.0868825	1.31106	1.06107
C22orf23	0.846763	-0.130877	0.0722383
PLXDC2	0.262959	-0.415771	0.580113
URGCP-MRPS24	0.170981	-3.75654	0.767051
PPP1R13L	0.169641	0.699585	0.77047
ZNF25	0.618095	-0.287932	0.208945
WWTR1-IT1	0.716583	-1.96588	0.144733
EIF3F	0.921406	0.00820859	0.0355491
GTSE1-DT	0.345411	1.70736	0.461664
NUP62CL	0.0857821	-0.461294	1.0666
SFI1	0.123613	0.465387	0.907935
PANX1	0.669512	0.197925	0.174242
UBAC2	0.40805	-0.124185	0.389287
CD2AP	0.60963	0.0848066	0.214934
ZBTB14	0.26631	-0.368878	0.574612
ARGLU1	0.0730492	-0.213462	1.13638
SPRN	0.65518	0.193652	0.183639
HYLS1	0.11024	-0.474181	0.957662
NBEAL2	0.630033	0.190795	0.200636
CCDC12	0.210624	0.20236	0.676491
HDHD2	0.909287	-0.0251625	0.0412989
MTRNR2L5	0.541421	1.7355	0.266465
CCDC57	0.753962	-0.139225	0.122651
TRIM21	0.907466	0.0638143	0.0421696
CSNK1G2	0.0204104	-0.326128	1.69015
REXO4	0.979002	-0.00461395	0.0092166
SERPINA5	0.652799	2.18395	0.185221
GTF3C5	0.92218	-0.0139587	0.0351842
HOOK2	0.242184	-0.376123	0.615854
STX6	0.392472	0.194048	0.406191
GLUL	0.00253267	-0.22805	2.59642
DHX9	0.631996	0.0357316	0.199286
RNASEL	0.994186	0.00308038	0.00253248
PP7080	0.549594	-0.121406	0.259958
FLVCR1	0.502211	-0.105391	0.299114
SSX2	0.939375	0.412517	0.0271611
PTPRG-AS1	0.760357	0.113266	0.118982
A1BG-AS1	0.203266	0.573286	0.691935
ZNF483	0.972645	0.0568631	0.0120457
CACYBP	0.611394	0.0348354	0.213679
AQR	0.604835	0.091205	0.218363
HOXA11-AS	0.458128	0.169885	0.339013
PCDHB16	0.939375	0.412517	0.0271611
YWHAH	0.811652	-0.0210564	0.09063
KCNN2	0.832654	0.297429	0.0795353
AJM1	0.637913	-0.869159	0.195238
SH3PXD2B	0.357281	0.277454	0.44699
SLC25A25-AS1	0.779048	0.135637	0.108436
C11orf94	0.716583	-1.96588	0.144733
BNC2-AS1	0.436206	-1.29099	0.360309
NENF	0.782328	0.0230548	0.106611
CHFR	0.157036	0.385929	0.804
ST8SIA4	0.171131	0.964606	0.76667
NSL1	0.106338	0.192761	0.973311
NCBP2L	0.732896	1.55867	0.134957
ITPKC	0.78942	0.124162	0.102692
RBMS2	0.50648	0.192309	0.295438
ATP5MG	0.00295281	0.168555	2.52976
MCF2L-AS1	0.898859	-0.0779714	0.0463085
SOX30	0.931683	0.409092	0.030732
FGF18	0.416625	1.18373	0.380255
RAB11B-AS1	0.906429	-0.0475997	0.0426662
DOLK	0.647931	-0.100053	0.188471
ALOX5	0.74248	-0.467396	0.129315
F13B	0.953967	0.313249	0.0204665
SFXN2	0.370297	-0.180237	0.431449
TBC1D3F	0.930387	-0.145921	0.0313365
POU1F1	0.862272	-0.938379	0.0643558
VSIG10	0.904201	-0.0397068	0.043735
GAN	0.179131	0.269269	0.74683
UPK2	0.773468	-1.38516	0.111558
GNL2	0.879717	0.0193896	0.055657
MEI4	0.350198	-2.07783	0.455686
CDCA8	0.0567824	0.26852	1.24579
NPNT	0.0808813	-0.931801	1.09215
AGO4	0.940986	-0.023142	0.0264166
DUSP3	0.163164	0.154358	0.787376
ZFPM2-AS1	0.571281	1.98598	0.24315
GALM	0.676013	0.0818709	0.170045
VASH1	0.872547	-0.040632	0.0592113
ING3	0.114158	-0.269083	0.942493
MPP6	0.0424526	-0.323	1.3721
GSDME	0.0427753	1.01583	1.36881
AHCY	0.0441287	-0.153497	1.35528
RIN2	0.569651	0.34813	0.244391
POLR3F	0.963227	-0.0112462	0.0162713
ARHGAP26-AS1	0.953967	0.313249	0.0204665
YLPM1	0.422236	0.120483	0.374445
PPP1R37	0.940938	-0.0342258	0.0264389
DCAF4	0.50885	-0.190301	0.29341
LPAR6	0.941585	0.31513	0.0261405
ITPRIP	0.757725	0.137229	0.120488
PPRC1	0.0582622	-0.289878	1.23461
PDCD11	0.730192	-0.0607068	0.136563
CNNM2	0.163981	0.434169	0.785206
ADAM12	0.192492	2.69217	0.715588
HNRNPA1L2	0.454954	-0.113754	0.342033
LHX8	0.383702	0.532343	0.416006
SNX7	0.344821	0.164171	0.462406
LRRIQ3	0.490458	0.256074	0.309398
TYW3	0.0211261	0.336411	1.67518
ZDHHC9	0.762722	0.0487957	0.117634
ZBED6CL	0.341392	-0.298844	0.466747
SHC4	0.440983	1.85356	0.355578
TCEAL3	0.476294	0.320058	0.322125
PRSS37	0.453747	-3.96243	0.343187
PBX1	0.900957	0.0182945	0.0452958
NDUFA4L2	0.115435	-2.17765	0.937662
MAMDC2	0.916355	-0.259314	0.037936
MROH8	0.594343	0.480709	0.225963
TM4SF4	0.953967	0.313249	0.0204665
TPST1	0.543666	0.200238	0.264668
TOR1AIP2	0.667379	0.0450497	0.175627
RCOR1	0.92352	0.0207569	0.0345535
PLD5	0.452043	0.793761	0.34482
PRPH2	0.607656	-2.75146	0.216342
TSNAX-DISC1	0.100392	1.25612	0.9983
PTPRK	0.870295	-0.0381783	0.0603335
GSTCD	0.0335022	-0.421046	1.47493
INTS12	0.605624	0.100385	0.217797
ZC3H3	0.0503521	0.62375	1.29798
STRN3	0.239059	0.170086	0.621495
ZNF239	0.697949	-0.144	0.156177
ATP6V1G2-DDX39B	0.265532	0.0884912	0.575883
CAGE1	0.862272	-0.938379	0.0643558
AQP12A	0.716583	-1.96588	0.144733
PRIMPOL	0.814658	0.0725268	0.0890246
ERAP1	0.176878	-0.578212	0.752326
SERINC5	0.553252	0.218519	0.257077
ENPP6	0.939375	0.412518	0.0271611
ERAP2	0.0353349	1.37397	1.4518
CMYA5	0.16721	1.83578	0.776738
RANGAP1	0.00889623	0.292612	2.05079
ZC3H7B	0.187567	-0.202886	0.726843
GDAP1	0.0671766	-0.491524	1.17278
RAB2A	0.706126	0.0443594	0.151118
GATAD1	0.186625	-0.219743	0.729031
MINDY4	0.529247	0.417522	0.276341
HS3ST3B1	0.0272481	0.4398	1.56466
SLC25A35	0.470686	0.348453	0.327268
SKA2	0.0880031	0.159625	1.0555
PLCB1	0.461207	0.188756	0.336104
NPIPA2	0.224405	-0.584928	0.648968
CACNA2D2	0.96647	-0.020353	0.0148117
MPV17L2	0.369639	-0.162738	0.432222
NOVA2	0.488285	0.875069	0.311327
AES	0.606321	-0.0729912	0.217297
PTOV1	0.552959	0.0598273	0.257307
KIF1B	0.421328	0.127468	0.37538
TXNDC5	0.716583	-1.96588	0.144733
TXNDC12-AS1	0.930911	0.371115	0.031092
ANKMY2	0.861939	0.0476563	0.0645237
MED7	0.964847	-0.0102391	0.0155418
ACTR3C	0.193216	-1.29447	0.713957
RPS20	0.535674	0.0334137	0.2711
CMTR2	0.940452	0.0264267	0.0266633
OXTR	0.516336	-0.920576	0.287068
TAOK1	0.890872	-0.0188121	0.0501847
CCDC163	0.0503617	-0.855001	1.2979
C4orf36	0.313578	1.78372	0.503654
IPO4	0.319067	-0.119922	0.496118
MAP4K5	0.823017	0.0433883	0.0845912
CCDC74B	0.466016	0.264325	0.331599
PCSK9	0.839714	1.09258	0.0758688
LTC4S	0.784691	0.509104	0.105301
ATRIP	0.42561	0.203382	0.370989
PSMD5	0.551899	-0.771199	0.25814
L3MBTL1	0.820236	0.140383	0.0860614
TMEM101	0.0661676	-0.287881	1.17935
XK	0.397418	-0.367404	0.400752
CHAC1	7.27134e-07	-1.8653	6.13839
WWP1	0.940717	-0.0144431	0.0265411
SPARC	0.744909	0.0648968	0.127897
CLDN5	0.946026	0.314399	0.0240971
EIF3C	0.401077	0.0708195	0.396772
ZCCHC4	0.842304	-0.0721177	0.0745314
TGFA	0.675069	0.558103	0.170652
CAMK2N1	0.695356	0.0924978	0.157793
TCP11L2	0.361992	-1.57654	0.4413
TMCO4	0.968021	0.0216992	0.0141152
SERINC2	0.000678461	1.10304	3.16848
SYNGAP1	0.923001	0.0283925	0.0347978
LYN	0.540259	0.131306	0.267398
LMLN2	0.666103	-2.32862	0.176458
LRRC43	0.967104	0.121316	0.0145269
SLTM	0.70502	-0.0609569	0.151799
CTDSPL2	0.964085	-0.00845977	0.0158845
TOMM40	0.400388	0.0888922	0.397519
NECTIN2	0.189959	-0.254645	0.721339
RNF216	0.888224	-0.0260523	0.0514776
SPPL3	0.951006	-0.00974585	0.0218169
APOC1	0.00235376	-0.432693	2.62824
GAREM2	0.730054	-0.1399	0.136645
U2SURP	0.905886	0.0100871	0.0429266
TTC8	0.0993622	-0.412972	1.00278
MFSD12	0.499791	0.138175	0.301211
DDX55	0.138398	-0.210144	0.85887
BCL2L14	0.953967	0.313249	0.0204665
MED17	0.779941	0.108041	0.107938
PLEKHM3	0.495553	0.259805	0.30491
PRNP	0.0356538	-0.348169	1.44789
RNASEH1	0.471937	0.138707	0.326116
RPS7	0.409134	-0.0461684	0.388134
PSKH1	0.267579	0.237292	0.572548
MRM3	0.230006	0.20902	0.638261
PARP3	0.679861	-0.192925	0.16758
FBXW8	0.981175	0.0108576	0.00825351
RBM17	0.551324	-0.0595761	0.258593
SCARNA14	0.884595	-0.129754	0.0532554
LRRC56	0.148143	2.40772	0.82932
ZBTB11-AS1	0.63529	-0.164464	0.197028
BSDC1	0.894207	-0.0164532	0.0485619
TMEM234	0.668101	0.12556	0.175158
STMP1	0.0763364	0.166843	1.11727
GRID2IP	0.939375	0.412517	0.0271611
CCDC28B	0.173029	0.280435	0.76188
IQCC	0.907578	0.0352719	0.0421162
NEURL4	0.308915	1.82709	0.510161
AIFM2	0.11732	0.754805	0.930628
ST8SIA6-AS1	0.428128	-3.36142	0.368426
MRPL48	0.517581	0.0972406	0.286022
RAB6A	0.567671	-0.0885162	0.245903
CYP46A1	0.936758	0.315994	0.0283726
LCN15	0.908844	-0.125453	0.0415107
PDE4A	0.664933	-0.198253	0.177222
ASB8	0.221922	-0.196604	0.6538
TMSB15B-AS1	0.860626	0.321615	0.0651854
RPS6KB2	0.495324	0.111549	0.305111
MRAP2	0.168186	0.981077	0.774209
SF3B6	0.64437	-0.0323337	0.190865
CETN2	0.938656	0.00894933	0.0274936
NINJ1	0.602179	-0.133205	0.220274
BARX1	0.759164	0.126231	0.119664
CYP26B1	0.876996	-0.0906762	0.0570026
OR2A1	0.666103	-2.32862	0.176458
INSL3	0.953967	0.313249	0.0204665
MRPL35	0.00534925	0.374352	2.27171
CCNL2	0.181505	-0.195307	0.741112
AMY1A	0.760536	0.896954	0.11888
AGTRAP	0.910148	-0.0174989	0.040888
CD163L1	0.953968	0.313241	0.020466
FAM200B	0.129958	-0.219451	0.886197
SRRM3	0.673521	-0.300778	0.171649
THOP1	0.00570497	0.292084	2.24375
ZNF554	0.194972	-0.61664	0.710028
RAB33B	0.834661	-0.0554953	0.0784899
C15orf62	0.986696	0.0368547	0.00581683
PNP	0.00334821	-0.352792	2.47519
NEDD4	0.976802	0.0105623	0.0101933
PDCD2	0.654871	-0.0393303	0.183844
WDR7	0.322706	0.323795	0.491193
DNAH7	0.44268	-1.27524	0.35391
FAM3D-AS1	0.953967	0.313249	0.0204665
SELENOI	0.878136	-0.024395	0.0564385
FAM78B	0.513396	-0.996404	0.289547
RCBTB1	0.559116	-0.118245	0.252498
PHF11	0.215993	0.680843	0.665561
MED4	0.15883	0.171842	0.799066
LRCH1	0.20603	-0.430034	0.68607
SUCLA2	0.0895814	0.214808	1.04778
NBEA	0.809702	0.0802992	0.091675
FAHD2B	0.518154	0.176384	0.285541
TC2N	0.294339	-0.282846	0.531152
DCX	0.812612	-0.953385	0.0901166
CD82	0.015683	1.4117	1.80457
CAPN6	0.802561	1.09627	0.0955221
TONSL-AS1	0.953967	0.313249	0.0204665
SERTAD4-AS1	0.660693	-0.196648	0.18
PELI3	0.318933	-0.370523	0.496301
TATDN3	0.396282	0.159749	0.401996
HES7	0.549504	-0.809103	0.26003
MAN2A1	0.0243659	0.503896	1.61322
ANKRD10	0.367715	-0.177502	0.434489
SREBF1	0.729041	0.0841406	0.137248
MTRNR2L12	0.740884	0.0717369	0.13025
PDE6H	0.953967	0.313249	0.0204665
KIF11	0.174309	0.147784	0.758681
SAV1	0.834326	0.0313741	0.0786643
AMN1	0.416552	0.306188	0.380331
BICD1	0.127979	-0.634111	0.892862
IGF1R	0.0502401	0.36549	1.29895
TMEM43	0.182366	-0.228129	0.739056
MTSS1	0.365343	0.568023	0.4373
KIAA0232	0.420148	0.206145	0.376598
OSR1	0.384289	-1.62095	0.415342
MAMLD1	0.877885	0.106179	0.0565623
ST6GALNAC5	0.576252	-0.726837	0.239387
PCDH9-AS1	0.939375	0.412517	0.0271611
ZNF346	0.733601	-0.0773563	0.13454
UNC5A	0.841673	-0.237959	0.0748566
ARL13B	0.304886	-0.255	0.515862
TIGD7	0.917424	0.09397	0.0374301
PDPK1	0.691362	-0.076636	0.160294
TM7SF3	0.00522683	0.422206	2.28176
CRADD	0.175532	0.41726	0.755645
DEF8	0.00353897	0.334768	2.45112
MDK	3.19432e-05	-0.398985	4.49562
AMBRA1	0.63369	0.114982	0.198123
ST8SIA1	0.58342	1.53535	0.234019
CMAS	0.220259	0.136405	0.657067
HCFC2	0.436952	0.252676	0.359567
PRKAB1	0.5085	0.150352	0.293709
XYLT1	0.0388974	-1.81517	1.41008
PSMD6-AS2	0.700072	-0.846806	0.154858
HS3ST6	0.793759	-0.959966	0.100311
RERE	0.313836	0.205808	0.503297
LHPP	0.897768	-0.0334514	0.0468356
TAX1BP1	0.611589	-0.0509607	0.21354
ADAMTSL3	0.665343	-1.05509	0.176954
DPYSL2	0.174327	0.275097	0.758636
STEAP1B	0.384037	0.548323	0.415627
MPRIP-AS1	0.670417	-0.515867	0.173655
ITGA1	0.269859	0.515081	0.568863
FOXO1	0.00697996	0.62388	2.15615
RAB6C-AS1	0.946299	0.0661634	0.0239715
FBXL5	0.198358	0.252649	0.70255
ARHGEF17	0.695432	0.402981	0.157745
KRTAP19-1	0.00688614	-1.90859	2.16202
GUCD1	0.0443583	0.285403	1.35303
VSNL1	0.225658	2.70814	0.646549
KATNBL1	0.663056	0.092323	0.17845
EMC7	0.318248	-0.115947	0.497235
SMG9	0.749789	-0.0737981	0.125061
UBE2D2	0.396596	-0.0810029	0.401651
SLC30A9	0.667121	0.0485954	0.175795
DIAPH1	0.0816005	0.308187	1.08831
IER5	0.172891	0.186711	0.762227
COPS2	0.0810225	-0.211962	1.09139
GABRB3	0.667405	-0.111273	0.17561
ANKHD1	0.0735303	0.592191	1.13353
OLAH	0.678345	-1.2061	0.168549
RPP38	0.42663	0.147244	0.369949
NMT2	0.723092	0.0645279	0.140806
ANKRD20A1	0.519634	-1.32019	0.284302
TMEM45A	0.135539	-0.386139	0.867936
ZNF678	0.346884	-0.181056	0.459816
RYK	0.350227	-0.167359	0.45565
TOPBP1	0.177603	0.193158	0.750549
SNRK	0.28216	-0.313081	0.549504
LDOC1	0.948096	-0.0103704	0.0231475
EXT1	0.636147	-0.0948575	0.196442
MAPK12	0.873579	-0.0323638	0.0586976
SHMT2	7.7013e-09	-0.544204	8.11344
RNFT2	0.0855387	0.436896	1.06784
QRFPR	0.804621	0.198934	0.0944085
POFUT2	0.778087	-0.0651614	0.108972
PDZD7	0.821788	-0.145231	0.0852401
MAPT	0.781106	0.0743437	0.10729
YAF2	0.893996	-0.027913	0.0486644
SLAIN1	0.311367	0.13607	0.506728
ISPD	0.854873	0.10967	0.0680984
DIAPH3	0.183562	-0.223288	0.736216
NPIPA7	0.522668	0.285228	0.281774
MSL3	0.499314	-0.151927	0.301626
CLNS1A	0.0733339	-0.146414	1.1347
TRIB3	5.14231e-08	-1.22523	7.28884
PTPA	0.644539	-0.0747248	0.190751
TRAPPC8	0.005487	0.418472	2.26067
CMC1	0.75957	0.0382348	0.119432
CCDC43	0.466403	0.0874206	0.331239
AKAP9	0.933359	0.0155593	0.0299513
GPM6A	0.954417	-0.0167497	0.0202618
ZKSCAN7	0.675912	2.14254	0.17011
OR8D1	0.939375	0.412518	0.0271611
HECA	0.587963	0.114203	0.23065
FAM237B	0.822202	-0.564216	0.0850214
IFRD1	3.238e-09	-0.8011	8.48972
CBX6	0.882092	0.0155716	0.0544863
ACSM2A	0.953967	0.313249	0.0204665
TRMT44	0.787638	0.0960688	0.103673
ISL2	0.156353	-0.327778	0.805894
PKD2L1	0.847945	-1.03765	0.0716324
MOCS2	0.0209261	0.303249	1.67931
ITGA2	0.576693	0.228905	0.239056
AKR1C4	0.666103	-2.32862	0.176458
COPS8	0.147972	0.150428	0.829821
BARD1	0.103882	0.295517	0.983461
FSTL5	0.80522	0.899177	0.0940852
DHRS7	0.492272	0.0898974	0.307795
PPM1A	0.368406	0.160221	0.433673
MSX2	0.00737841	0.58611	2.13204
SAP30BP	0.418537	0.129574	0.378267
VPS11	0.534161	0.147365	0.272328
WDR92	0.203069	0.323465	0.692356
ZNF487	0.538555	-0.341613	0.26877
ACOXL-AS1	0.811495	1.28655	0.0907142
DDR1	0.204498	-0.462272	0.689311
FLJ45513	0.344852	-2.07783	0.462368
RPP25	0.116664	-0.26649	0.933065
GRINA	0.47193	-0.0830487	0.326122
MAT1A	0.116611	3.87153	0.93326
ARIH2	0.62574	-0.0551224	0.203606
PLPPR3	0.671043	0.574882	0.173249
WRNIP1	0.998694	0.000223996	0.000567472
MRS2	0.911988	-0.0155285	0.0400106
DNAJC19	0.221654	-0.15507	0.654325
PARP2	0.396187	0.140267	0.4021
GSTP1	0.74185	-0.0196437	0.129684
SMIM11A	0.819233	-0.0420777	0.0865928
FDX2	0.598955	-0.0971827	0.222606
EXOC3L1	0.309312	-2.27961	0.509603
RNA5S14	0.766635	-0.668594	0.115412
POU2F2	0.582106	-0.556929	0.234998
CLHC1	0.969561	0.0221222	0.013425
NEUROD1	0.317221	1.71041	0.498638
DLG5	0.321056	0.173727	0.493419
DUSP19	0.792735	0.0958491	0.100872
FRZB	0.925851	-0.396802	0.033459
NCK1	0.179678	-0.260068	0.745504
TMED6	0.279331	1.87373	0.55388
FMOD	0.716583	-1.96588	0.144733
ZBED9	0.809615	-0.101467	0.0917214
TRMT1L	0.0422807	0.357795	1.37386
IFI6	0.731677	0.0677019	0.135681
AHDC1	0.781518	-0.103784	0.107061
CASC19	0.834032	0.489938	0.078817
LPP	0.452371	-0.166761	0.344505
PCOLCE	0.749189	0.137391	0.125409
DAXX	0.584517	0.0791303	0.233203
RIMBP3C	0.0850029	2.73385	1.07057
STK17B	0.0649729	0.40763	1.18727
CDC123	0.493549	0.0600243	0.30667
PHC3	0.000655907	0.984098	3.18316
AUTS2	0.472965	0.08468	0.325171
PIAS1	0.58613	0.085215	0.232006
RALBP1	0.413688	0.143907	0.383327
MIS18A	0.775933	0.0276497	0.110176
PYCR3	0.200391	-0.317958	0.698122
TSTA3	0.365777	-0.197294	0.436784
NUDT10	0.928392	0.0229422	0.0322687
ZNF300	0.514988	0.304954	0.288203
TNIP1	0.958196	-0.0105195	0.0185455
G3BP1	0.424684	0.0694475	0.371934
SUMF2	0.253665	-0.136896	0.595739
ZNF628	0.517714	0.269902	0.28591
MMP2	0.331776	0.493747	0.479155
EEF1D	0.0987127	-0.116353	1.00563
STRADB	0.900652	0.0229385	0.045443
PDZK1	0.858353	0.323174	0.0663339
YTHDC1	0.659377	0.0621497	0.180866
A4GALT	0.599913	0.422355	0.221912
ATF4	1.42532e-10	-0.377111	9.84609
SLCO3A1	0.0958943	3.00775	1.01821
LANCL2	0.97737	0.00625799	0.00994084
DDC	0.738333	0.673773	0.131748
FIGNL1	0.427674	0.140436	0.368887
SEC61G	0.0609573	-0.121283	1.21497
PACERR	0.601091	-1.97354	0.22106
CBFA2T2	0.83066	0.0639964	0.0805768
NUCKS1	0.572674	0.0316044	0.242092
ABHD1	0.467974	-0.503957	0.329779
MEIS1	0.522776	-0.17118	0.281684
MAP2K4	0.960241	-0.00853473	0.0176199
EIF3H	0.418634	-0.0539371	0.378165
UTP23	0.581479	0.104573	0.235466
SLC38A3	0.583008	-0.345306	0.234325
OLMALINC	0.569609	-0.130983	0.244423
MSANTD4	0.140471	-0.324663	0.852413
TNPO2	0.552358	-0.0917706	0.257779
ZNF721	0.988629	0.00287219	0.00496646
CCNI	0.104868	-0.171166	0.979356
TOMM7	0.0650811	0.10043	1.18655
EFR3A	0.54884	0.131941	0.260554
ENOPH1	0.51703	-0.0838905	0.286484
LIN52	0.938173	0.0152358	0.0277173
E2F5	0.667208	-0.0714191	0.175739
ABCB8	0.482381	0.140365	0.31661
C2orf42	0.146354	0.605428	0.834595
TRAK2	0.668953	0.120513	0.174604
MAPK4	0.399421	-0.834118	0.398569
GCC2-AS1	0.700871	1.54503	0.154362
ATF5	0.466804	-0.26843	0.330865
MRPL57	0.682325	0.0404275	0.166009
EIF4B	0.00633441	-0.2123	2.19829
ERVH48-1	0.872823	0.866294	0.059074
NRXN3	0.421947	0.212285	0.374742
PPP1CB	0.732493	-0.0306336	0.135196
ADAT3	0.562243	-3.09074	0.250076
ABCD1	0.202029	0.802542	0.694586
SLC25A38	0.701486	0.0754929	0.153981
ESS2	0.557426	-0.107132	0.253813
CSRNP1	0.355693	-0.469075	0.448925
GRID2	0.247296	-1.73089	0.606783
TRIM59	0.591835	-0.0974305	0.227799
IQCH-AS1	0.471977	0.591413	0.326079
CRLS1	0.468969	-0.0893347	0.328855
ZNF394	0.396377	0.275212	0.401891
UBAP2L	0.0204332	0.221187	1.68966
PARD6A	0.703034	0.225193	0.153024
ZNF821	0.949792	-0.0262564	0.0223714
STRAP	0.507312	0.0475925	0.294725
SLCO1C1	0.932352	-0.258513	0.0304203
AEBP2	0.572468	0.0940836	0.242249
DDX19A	0.123385	-0.219851	0.908736
SLC9A6	0.978175	0.00651232	0.00958351
PRDX1	0.000506431	0.218418	3.29548
DDX58	0.648974	0.354001	0.187773
DDX19B	0.485619	0.149294	0.313704
CMTM7	0.483344	-0.136507	0.315744
FBXL2	0.0659032	-0.587816	1.18109
EEF1AKMT3	0.00107558	-1.41973	2.96836
NAT2	0.939375	0.412514	0.0271609
TTC34	0.244256	-1.73384	0.612155
SYTL4	0.866247	-0.0731846	0.0623583
ATAD3C	0.503528	0.928114	0.297976
CTSK	0.161714	-1.56716	0.791253
MCL1	0.612646	-0.0507091	0.21279
ADAMTSL4	0.596552	-1.34543	0.224352
EHD2	0.827072	0.167703	0.0824568
RNGTT	0.342646	0.21056	0.465154
HOTAIR	0.243771	-0.42203	0.613017
ROCR	0.548536	-2.27297	0.260795
C2-AS1	0.716583	-1.96588	0.144733
ATG101	0.478792	-0.190531	0.319853
CLIC4	0.885285	0.0162951	0.0529169
CCPG1	0.320402	-0.23899	0.494304
SLC16A4	0.117406	1.04378	0.930311
CRYM-AS1	0.585252	-0.786147	0.232657
SLC9A3R2	0.768335	-0.0580809	0.114449
LDLRAD4	0.812985	-0.157363	0.0899175
KCTD19	0.256139	0.9284	0.591524
ZNF573	0.378956	0.316774	0.421411
CLDN4	0.793523	-0.463165	0.10044
UGT3A2	0.288802	0.61033	0.539399
FAM84B	0.00205361	-0.445852	2.68748
HOXC-AS1	0.406142	-0.403511	0.391322
PHF3	0.665904	-0.0786162	0.176588
CEP70	0.721962	0.0863382	0.141485
ICA1L	0.413437	0.280082	0.38359
PPM1L	0.894926	0.0404135	0.0482129
NCAPH2	0.478037	-0.118093	0.320538
TOMM34	0.908604	0.016315	0.0416253
BMP3	0.833093	0.433054	0.0793067
PRDM8	0.418557	-0.631264	0.378246
GRIK4	0.193392	1.73713	0.713561
MITF	0.277935	-0.327893	0.556057
ENTPD5	0.417265	-0.227243	0.379588
PLCD1	0.451877	0.726329	0.34498
AASS	0.267187	0.531853	0.573184
APOBEC3C	0.725587	0.0527868	0.13931
WDR72	0.683281	2.18466	0.165401
LYPLA2	0.0286177	0.430877	1.54336
REV3L-IT1	0.266656	2.94228	0.574048
ELOA	0.0788193	0.267674	1.10337
HIST2H2BE	0.0262846	-0.994766	1.5803
ZBTB40	0.739199	0.0877748	0.131239
AMER1	0.2376	-0.442331	0.624154
ORC5	0.470207	-0.138051	0.327711
DNAAF5	0.948138	-0.00902075	0.0231284
SLC25A45	0.618198	0.316335	0.208872
RPL29	0.0903233	-0.116394	1.0442
HSPA8	0.851204	0.0246857	0.0699661
CENPJ	0.437168	-0.206077	0.359352
PARD3-AS1	0.609298	1.03704	0.21517
PPP1R9A	0.343946	0.629659	0.46351
COG6	0.213354	-0.248252	0.670899
PLEKHB2	0.766022	-0.0399388	0.115759
BIRC6	0.40162	-0.136699	0.396185
NOL10	0.159205	-0.219585	0.798043
TSR2	0.0944133	0.267576	1.02497
PRDM13	0.00927566	-1.03029	2.03266
CTBP1	0.416022	-0.0779035	0.380883
FBXL4	0.234706	-0.274614	0.629476
CCNC	0.770533	0.0323415	0.113209
TPTEP2-CSNK1E	0.373333	0.109075	0.427904
FBP1	0.971358	-0.0838292	0.0126205
MORF4L1	0.233334	0.0803284	0.632022
TNIK	0.619076	0.106517	0.208256
ZMYND8	0.307007	-0.203898	0.512852
FAM114A2	0.69135	0.0835099	0.160302
FAM167A	0.339064	-1.07127	0.469718
SGK2	0.853479	-0.94077	0.0688072
CST6	0.770353	1.57132	0.11331
PCMT1	0.387038	-0.0713896	0.412246
DAB1	0.615759	-0.644294	0.21059
CCDC170	0.950883	0.0568425	0.0218727
GRAMD2A	0.666103	-2.32862	0.176458
RHOT1	0.713197	-0.0701347	0.14679
ZNF74	0.219283	-0.246037	0.658996
PPIL6	0.131964	-1.19494	0.879545
CHRD	0.300037	1.02785	0.522825
THPO	0.413373	1.84074	0.383658
P3H2	0.741092	0.402647	0.130128
PURPL	0.0809523	-0.902605	1.09177
PPP1R14D	0.679586	1.11457	0.167755
LSM14A	0.982884	-0.00230682	0.00749773
CPLANE1	0.699703	-0.134052	0.155086
FAR1	0.877797	0.0194264	0.056606
HMBS	0.295401	0.150495	0.529587
KMT5A	0.978069	-0.00422656	0.00963044
OTUD6B-AS1	0.457401	0.141584	0.339703
DLX6	0.284798	0.418702	0.545462
PCDHGA6	0.810715	0.481851	0.0911317
NOL8	0.512824	-0.108069	0.290032
IRAK4	0.706862	0.118717	0.150665
CCDC151	0.283165	0.987116	0.547961
KCNG3	0.460965	-0.397756	0.336332
TIMM10	0.814584	0.0260183	0.0890643
CHPF	0.0387838	-0.431	1.41135
ACSL3	0.680561	0.0428187	0.167133
BAG6	0.0318552	0.204558	1.49682
MRPS23	0.64034	0.0516607	0.193589
LUC7L	0.173507	-0.213188	0.760682
PRRC2A	0.690654	0.062513	0.160739
HSD11B1L	0.342259	-0.371153	0.465645
TERT	0.79087	0.241157	0.101895
CHML	0.959733	-0.00847922	0.0178496
AMBN	0.34422	-0.862892	0.463164
RPL39L	0.261178	-0.16549	0.583064
IKZF5	0.0564051	-0.31579	1.24868
SYNPO2	0.965803	0.0914395	0.0151116
SPACA4	0.939375	0.412517	0.0271611
RNF223	0.716583	-1.96588	0.144733
XIAP-AS1	0.954478	0.293085	0.0202341
ASXL3	0.545109	-0.29137	0.263516
SLC25A52	0.571444	1.02303	0.243027
ACTL6A	0.538602	0.0962277	0.268732
SYNGAP1-AS1	0.156417	2.85729	0.805715
AFG3L2	0.570038	-0.0872727	0.244096
PPIE	0.79009	0.0434736	0.102323
SMAP2	0.819803	0.0450548	0.0862903
SS18	0.300386	-0.132645	0.52232
WHRN	0.227946	0.569638	0.642168
ZNF529-AS1	0.684705	0.411707	0.164497
ZNF219	0.690514	0.151024	0.160828
C12orf50	0.953967	0.31325	0.0204665
CASP7	0.732039	0.0639736	0.135466
PPP1R36	0.572071	1.73896	0.24255
ARHGEF40	0.362481	-0.393733	0.440715
NSMF	0.278017	0.242881	0.555928
CEBPD	0.272919	-0.49404	0.563966
KDM4B	0.810365	0.0548827	0.0913191
TICAM1	0.570699	-0.408066	0.243593
CCDC32	0.90159	0.0367294	0.0449907
ATP2B1	0.856763	0.0253871	0.0671393
UHRF1	0.0422269	-0.24003	1.37441
ORAI1	0.74289	0.0934337	0.129076
HOOK3	0.977999	-0.00412852	0.00966175
TMPRSS4	0.953967	0.313249	0.0204665
DHRS11	0.886938	0.03721	0.0521065
LHX1	0.394298	0.466558	0.404176
DGLUCY	0.382422	0.346694	0.417458
RPH3A	0.666103	-2.32862	0.176458
ARHGAP11A	0.29548	0.183086	0.529472
CHAMP1	0.576314	0.0977149	0.23934
INPP5F	0.932667	0.0253785	0.0302734
GRM3	0.491856	0.991929	0.308162
CHPF2	0.765376	-0.0591582	0.116125
CD247	0.939375	0.412517	0.0271611
SUCNR1	0.953967	0.313249	0.0204665
APPL1	0.72245	-0.0499906	0.141192
MUM1L1	0.728667	0.262273	0.137471
BACE1-AS	0.296621	-0.393016	0.527798
PRR29	0.862271	-0.938381	0.064356
C4B	0.834376	-0.747207	0.078638
RBPMS-AS1	0.877152	0.498325	0.0569253
HOXD8	0.318942	0.328101	0.496288
CREG2	0.770205	-0.96879	0.113394
TMEM270	0.953967	0.313249	0.0204665
SYF2	0.194298	-0.182725	0.711533
RSRP1	0.31118	-0.19372	0.506989
OSBP	0.339883	-0.1522	0.46867
UBB	0.574513	0.0287511	0.2407
CDK1	0.331585	0.0828724	0.479405
STX8	0.143275	0.312374	0.84383
DTX4	0.967247	0.220414	0.0144628
ATG2A	0.105069	0.494419	0.978527
EHD1	0.486749	0.140994	0.312695
ANO3	0.953968	0.313241	0.020466
ZNF488	0.722648	0.200305	0.141073
OGDHL	0.394354	-0.273823	0.404113
CCNT1	0.332232	-0.159486	0.478559
PUS7L	0.132142	0.295362	0.878958
ATG3	0.966971	0.00481923	0.0145864
LBR	0.0805023	-0.149957	1.09419
RABL3	0.928008	-0.0195702	0.0324483
ADPRH	0.680683	0.712856	0.167055
EPHX1	0.220238	0.241426	0.657107
DHH	0.939375	0.412518	0.0271611
ZNF638	0.494025	0.117675	0.306251
TARBP2	0.0618762	0.343729	1.20848
WNT8B	0.666103	-2.32862	0.176458
FAM186B	0.754131	-0.811334	0.122553
RDH5	0.895739	-0.283029	0.0478185
PGM1	0.41625	-0.0905493	0.380646
HUNK	0.142523	0.525785	0.846116
AGAP2	0.800195	0.191026	0.0968043
TH	0.939375	0.412517	0.0271611
GABRA4	0.989437	0.05959	0.00461181
CATSPER4	0.939375	0.412517	0.0271611
MTF1	0.513931	0.185304	0.289095
ZNF548	0.0156512	1.51896	1.80545
PPIAL4A	0.530507	-1.683	0.275309
APOA1	0.476862	-0.558656	0.321607
GCH1	0.757113	0.0747483	0.120839
UTRN	0.186999	-0.318769	0.728161
ARAF	0.0568065	-0.346827	1.2456
PTPRJ	0.980006	-0.00957584	0.00877124
C11orf49	0.492208	0.145988	0.307852
LARP1B	0.29606	-0.191961	0.52862
KLK8	0.876816	-0.161965	0.0570914
ITGB3BP	0.555641	-0.061003	0.255206
KPNA4	0.803579	-0.0346188	0.0949715
ASIC2	0.928452	-0.484608	0.0322406
MCM3AP-AS1	0.950074	-0.0360646	0.0222424
PALM2-AKAP2	0.956528	0.0138598	0.0193025
ZNF407	0.472904	-0.336786	0.325227
ZNF142	0.575624	0.179412	0.239861
RSPH9	0.97564	0.0815913	0.0107106
TTC36	0.963	0.154333	0.0163735
PPARD	0.431397	0.231901	0.365123
MTRF1L	0.139256	0.328162	0.856187
EFCAB3	0.939375	0.412517	0.0271611
COPS9	0.0180687	0.173993	1.74307
MIA2	0.722045	-0.0901685	0.141436
RAPGEFL1	0.653893	-0.359271	0.184493
PDK3	0.567744	0.176041	0.245847
DLG3-AS1	0.926256	0.318123	0.0332692
C2orf16	0.894112	0.120326	0.0486078
NR2F1	0.00679454	0.327785	2.16784
TCEANC2	0.665471	-0.0740876	0.176871
CHRAC1	0.89962	0.0183796	0.0459408
ZNF221	0.590052	0.864304	0.22911
TMEM59	0.215409	0.135321	0.666737
TMBIM6	0.113896	-0.0876227	0.943492
NF1	0.980594	-0.00398491	0.00851091
ALKAL1	0.0171056	-0.488743	1.76686
TBX3	0.21642	0.22699	0.664703
VKORC1L1	0.140569	-0.199017	0.85211
ANXA6	0.360521	-0.129982	0.443069
GMFB	0.527081	0.0876372	0.278122
ZNF441	0.471744	-0.708612	0.326294
NATD1	0.394933	0.272386	0.403476
TMEM87A	0.537898	0.131582	0.2693
RNF103-CHMP3	0.939375	0.412517	0.0271611
DYNC1I2	0.00614959	0.381681	2.21115
NIPSNAP3B	0.725852	0.5456	0.139152
SYCE1L	0.202106	-0.62118	0.69442
ABCA1	0.385304	0.650141	0.414197
HIST2H2AA3	0.377651	-0.234317	0.422909
HIST2H3C	0.16019	-0.919354	0.795364
HIST2H2BF	0.684388	-0.479142	0.164698
MRPL14	0.926883	0.0089187	0.0329752
GPR137C	0.212224	0.512054	0.673205
HBEGF	0.330489	-0.551571	0.480843
LYSMD2	0.246447	-0.552413	0.608277
FGF7	0.174088	-3.00617	0.759232
SLC27A2	0.333522	-0.334069	0.476876
FBXW11	0.936037	-0.0108538	0.0287071
SPAG5	0.00888924	0.410364	2.05114
SPINK8	0.862272	-0.938379	0.0643558
MAP3K20-AS1	0.629721	1.31122	0.200852
HAUS7	0.139263	0.363295	0.856164
ARHGAP19	0.094136	0.307825	1.02624
LCAT	0.326202	0.802448	0.486513
IL1R1	0.598399	0.621623	0.223009
COL21A1	0.380497	2.13588	0.419649
EIF2D	0.433247	-0.104737	0.363264
KLHL31	0.426401	1.49965	0.370182
NLN	0.769485	0.0499717	0.1138
CENPK	0.934081	0.0129989	0.0296155
POLH-AS1	0.789748	-0.25326	0.102511
ATP2C1	0.723376	-0.0560445	0.140636
DUS1L	0.182477	-0.133408	0.738792
CNBP	0.114645	-0.146369	0.940647
ZNF829	0.895806	0.0714655	0.0477862
FASN	0.172371	-0.123323	0.763535
GPR173	0.809261	-1.30112	0.0919114
HES1	0.589664	0.0618408	0.229396
GAS6	0.529569	0.24575	0.276078
PIGR	0.953967	0.313249	0.0204665
CCDC82	0.760229	-0.0684145	0.119056
DDX53	0.666103	-2.32862	0.176458
FAM110C	0.34618	-2.68957	0.460698
APOBR	0.872824	0.866287	0.0590735
SRRM2	0.153614	-0.118628	0.81357
ABCA3	0.578014	-0.133783	0.238062
EIF4E3	0.208199	-0.265079	0.681521
KCTD5	0.313846	0.162863	0.503283
CLSPN	0.100158	0.620349	0.999313
TEKT2	0.457215	-0.844452	0.33988
BBS10	0.838503	-0.044333	0.0764955
FIZ1	0.857689	-0.0804325	0.0666701
CNOT4	0.504311	-0.134801	0.297302
FAHD2A	0.395244	-0.194224	0.403135
KCNIP3	0.737397	-0.248774	0.132298
NKX2-2	0.566307	0.355036	0.246948
RBCK1	0.675044	-0.077694	0.170668
TMX4	0.650491	-0.069359	0.186759
SARNP	0.816832	-0.0881213	0.087867
HSP90B1	7.03836e-65	-1.13333	64.1525
CFAP52	0.977975	0.0723111	0.00967227
FAM96B	0.126078	0.14167	0.89936
RRAD	0.447841	2.45592	0.348876
MAPK9	0.683486	-0.053142	0.16527
GK-IT1	0.953967	0.313249	0.0204665
COG7	0.68356	0.0959482	0.165224
CDK11A	0.825107	1.09393	0.0834899
CDC27	0.984373	-0.00231334	0.00684044
FAM126B	0.892301	0.0299686	0.0494888
GJD2	0.807126	0.52789	0.0930584
ZNF732	0.635215	1.7455	0.197079
RNF150	0.242872	-0.334394	0.614622
HCG25	0.24902	-1.81432	0.603766
HIVEP1	0.912266	0.0418717	0.0398786
USP49	0.742286	-0.122937	0.129429
CCDC169	0.72403	1.81124	0.140244
TOP1	0.857268	-0.0179387	0.0668834
TMEM11	0.483669	-0.108298	0.315452
KRT17	0.561188	-0.606935	0.250892
MAP3K3	0.0197397	0.478386	1.70466
BHLHB9	0.102546	0.419069	0.98908
TAF12	0.00702819	0.411393	2.15316
MGAT4B	0.308698	0.154052	0.510466
ENOX1	0.0141522	-0.846767	1.84918
MRNIP	0.621463	-0.121537	0.206585
RPL8	0.174996	-0.0714159	0.756971
SNX32	0.91897	0.40241	0.0366985
JMJD7-PLA2G4B	0.882722	-0.0651703	0.0541762
DOK4	0.104932	0.791233	0.979091
GABARAPL2	0.765988	-0.024868	0.115778
ATF7IP	0.172031	0.347043	0.764392
PLEKHG5	0.283077	-0.743698	0.548096
NPIPB5	0.930443	-0.0233607	0.0313101
IQGAP3	0.412806	-0.226075	0.384254
NPAS2	0.51339	-0.303989	0.289553
KIRREL1	0.17141	-0.436273	0.765963
TMEM116	0.705021	0.120662	0.151798
UCKL1	0.158597	-0.28914	0.799706
DDX27	0.267063	-0.166419	0.573387
RNF114	0.838739	0.0265798	0.0763732
PMEPA1	0.0892521	-0.595267	1.04938
STX16	0.0321804	-0.290023	1.49241
GGN	0.741897	0.816778	0.129656
TRAF5	0.164865	-0.412204	0.782872
FUCA1	0.570993	-0.101407	0.243369
GEMIN5	0.0305695	-0.369221	1.51471
LEMD2	0.821029	-0.0479554	0.0856413
MRPL22	0.0841885	0.196402	1.07475
SOS1-IT1	0.604241	0.419273	0.21879
ZBED1	0.192234	0.332977	0.716169
LRP4-AS1	0.459034	-0.596035	0.338156
MVD	0.368629	0.224346	0.433411
TMEM189	0.862522	-0.0260171	0.06423
ARAP2	0.131942	-0.970944	0.879618
FAM13B	0.0647636	-0.431727	1.18867
ZNF280B	0.768457	0.0774685	0.114381
ANKRD18B	0.614458	-0.147053	0.211508
ASCC1	0.778033	-0.0548356	0.109002
PDS5B	0.10833	0.318518	0.96525
ZNF92	0.435117	-0.150891	0.361394
EID1	0.460469	0.0653584	0.3368
FAM13A-AS1	0.618626	-0.524541	0.208572
KANSL1L	0.774015	-0.138771	0.11125
PLPP3	0.0679029	0.505604	1.16811
TBC1D8B	0.761213	-0.140084	0.118494
VPS4A	0.106504	0.20339	0.972634
WDR44	0.0181194	0.494785	1.74186
FXYD6	0.209347	0.311112	0.679134
MAGEA2	0.126711	0.51155	0.897187
BRIP1	0.191495	0.280439	0.717844
RHOXF2	0.866085	-0.831749	0.0624397
RIF1	0.538151	-0.0928104	0.269096
ATP8A2	0.195002	1.69224	0.709961
MIS18BP1	0.861515	0.0391159	0.064737
NRL	0.0913699	-1.84823	1.0392
LYRM9	0.679114	-0.167994	0.168057
PTPMT1	0.758335	0.0392597	0.120139
HS6ST1	0.0473325	-0.410857	1.32484
SLC29A2	0.567653	-0.158727	0.245917
GJC3	0.919275	-0.259102	0.0365547
WWOX	0.750912	-0.0851856	0.124411
ARPP21	0.953967	0.313249	0.0204665
TOM1L1	0.551179	-0.0934174	0.258707
ARHGEF16	0.833401	-0.137278	0.079146
SESN2	0.00171635	-0.377845	2.76539
PRH1	0.801837	-0.266491	0.0959142
TRAF3IP2-AS1	0.227231	-0.479775	0.643533
ZMIZ2	0.0779353	0.371618	1.10827
SMPDL3B	0.994848	-0.00180352	0.00224328
MARC2	0.0108261	-0.726009	1.96553
PMS2	0.414221	0.37052	0.382768
CTTN	0.709972	0.0361422	0.148759
DHX29	0.893375	0.0232214	0.0489661
TRAM1L1	0.0403332	1.20664	1.39434
TBC1D15	0.12536	-0.241082	0.901841
ATP2B3	0.343531	-2.80746	0.464034
GJA3	0.680669	-0.204371	0.167064
FTSJ1	0.268956	-0.177812	0.570318
TBC1D3K	0.776158	-0.425565	0.11005
BOP1	0.966776	0.00558228	0.0146742
STYK1	0.0645693	3.41325	1.18997
PLTP	0.0902815	-0.415226	1.0444
EPDR1	0.4096	-0.292787	0.38764
F2R	0.445165	-0.161601	0.351479
TTC21A	0.544226	0.938059	0.264221
CXCL17	0.877018	-0.541389	0.0569914
RCN1	0.00263545	-0.336683	2.57915
ACTB	0.000304816	0.193842	3.51596
XRN2	0.399157	-0.0864398	0.398856
BTBD11	0.410557	-0.340026	0.386626
MAN1B1-DT	0.213535	-1.02072	0.670531
ZDHHC6	0.749126	0.0517373	0.125445
C6orf48	3.58013e-08	-0.638207	7.4461
CD22	0.716583	-1.96588	0.144733
FLOT2	0.1046	0.233387	0.980468
SDF2	0.974566	-0.00614764	0.0111887
FGF14	0.953968	0.313241	0.020466
BAIAP2-DT	0.403593	0.311601	0.394057
IFT43	0.995501	0.000999598	0.00195836
HOXC4	0.0814232	-0.317278	1.08925
ADM	0.786359	0.0996559	0.104379
BTBD10	0.912841	0.0246833	0.0396046
C17orf97	0.0554542	1.25281	1.25607
ZKSCAN4	0.54726	-0.270465	0.261806
RGPD1	0.933278	0.40984	0.0299892
ACAP3	0.543898	-0.233614	0.264483
OGT	0.0131146	-0.311035	1.88225
ITGB1BP2	0.79657	-0.931403	0.0987758
ARPC5	0.00827015	0.255449	2.08249
STX11	0.943034	-0.0620463	0.0254724
PLXNA1	0.63144	0.0979493	0.199668
DDX21	2.05676e-05	-0.291921	4.68682
BMS1	0.281308	0.143428	0.550818
STOX1	0.835928	0.085969	0.077831
RET	0.859716	-0.113496	0.0656452
PPP1R7	0.0390904	0.232346	1.40793
PASK	0.205299	0.333337	0.687613
CTNND2	0.716583	-1.96588	0.144733
P2RY1	0.318151	-0.249721	0.497367
CPLANE2	0.937827	-0.0534854	0.0278772
STRN4	0.443672	0.123034	0.352938
MT1X	0.0134648	-0.532777	1.8708
FECH	0.592084	-0.0988554	0.227617
CASC1	0.53496	-1.32585	0.271678
ABRACL	0.0237752	0.221197	1.62388
LRMP	0.913105	0.384269	0.0394791
TPRA1	0.00535564	-0.651133	2.27119
KLLN	0.676178	-0.345256	0.169939
SMIM29	0.500805	0.158908	0.300331
NF2	0.156925	0.186292	0.804307
UBTD2	0.919275	-0.0155935	0.0365543
TBC1D22A-AS1	0.887138	-0.309389	0.052009
CREBRF	0.959906	0.0147058	0.0177714
DCBLD1	0.84268	-0.0592695	0.0743374
VTI1B	0.347643	0.123978	0.458867
SFXN1	0.033115	0.189676	1.47998
PSMA3	0.408292	0.0662376	0.389029
PIGH	0.776423	-0.0470346	0.109902
AFAP1	0.149534	0.469022	0.825259
COA4	0.575381	0.0531134	0.240044
[truncated: 14,276 more rows]
